# Supplementary material
Source: publisher figshare collection journal article supplement (https://acs.figshare.com/ndownloader/files/3717841)
Supplement: Supplementary file 1 [file 3717841]

 
data_shelxl 
  
_audit_creation_method            'SHELXL-2014/7' 
_shelx_SHELXL_version_number      '2014/7' 
_chemical_name_systematic         ? 
_chemical_name_common             ? 
_chemical_melting_point           ? 
_chemical_formula_moiety          'C31 H48 O4' 
_chemical_formula_sum 
 'C31 H48 O4' 
_chemical_formula_weight          484.69 
  
loop_ 
 _atom_type_symbol 
 _atom_type_description 
 _atom_type_scat_dispersion_real 
 _atom_type_scat_dispersion_imag 
 _atom_type_scat_source 
 'C'  'C'   0.0181   0.0091 
 'International Tables Vol C Tables 4.2.6.8 and 6.1.1.4' 
 'H'  'H'   0.0000   0.0000 
 'International Tables Vol C Tables 4.2.6.8 and 6.1.1.4' 
 'O'  'O'   0.0492   0.0322 
 'International Tables Vol C Tables 4.2.6.8 and 6.1.1.4' 
  
_space_group_crystal_system       orthorhombic 
_space_group_IT_number            19 
_space_group_name_H-M_alt         'P 21 21 21' 
_space_group_name_Hall            'P 2ac 2ab' 
  
_shelx_space_group_comment 
; 
The symmetry employed for this shelxl refinement is uniquely defined 
by the following loop, which should always be used as a source of 
symmetry information in preference to the above space-group names. 
They are only intended as comments. 
; 
  
loop_ 
 _space_group_symop_operation_xyz 
 'x, y, z' 
 'x+1/2, -y+1/2, -z' 
 '-x, y+1/2, -z+1/2' 
 '-x+1/2, -y, z+1/2' 
  
_cell_length_a                    11.738(3) 
_cell_length_b                    13.856(3) 
_cell_length_c                    17.106(3) 
_cell_angle_alpha                 90 
_cell_angle_beta                  90 
_cell_angle_gamma                 90 
_cell_volume                      2782.1(11) 
_cell_formula_units_Z             4 
_cell_measurement_temperature     173(2) 
_cell_measurement_reflns_used     2062 
_cell_measurement_theta_min       30.10 
_cell_measurement_theta_max       78.00 
  
_exptl_crystal_description        prism 
_exptl_crystal_colour             colorless 
_exptl_crystal_density_meas       ? 
_exptl_crystal_density_method     'not measured' 
_exptl_crystal_density_diffrn     1.157 
_exptl_crystal_F_000              1064 
_exptl_transmission_factor_min    ? 
_exptl_transmission_factor_max    ? 
_exptl_crystal_size_max           0.240 
_exptl_crystal_size_mid           0.220 
_exptl_crystal_size_min           0.200 
_exptl_absorpt_coefficient_mu     0.580 
_shelx_estimated_absorpt_T_min    0.873 
_shelx_estimated_absorpt_T_max    0.893 
_exptl_absorpt_correction_type    multi-scan 
_exptl_absorpt_correction_T_min   0.752 
_exptl_absorpt_correction_T_max   0.890 
_exptl_absorpt_process_details    'REQAB (Rigaku, 1998)' 
_exptl_absorpt_special_details    ? 
_diffrn_ambient_temperature       173(2) 
_diffrn_radiation_wavelength      1.54187 
_diffrn_radiation_type            CuK\a 
_diffrn_source                    ? 
_diffrn_measurement_device_type   'Rigaku XtaLAB P200' 
_diffrn_measurement_method        \w 
_diffrn_detector_area_resol_mean  5.814 
_diffrn_reflns_number             26375 
_diffrn_reflns_av_unetI/netI      0.0342 
_diffrn_reflns_av_R_equivalents   0.0464 
_diffrn_reflns_limit_h_min        -14 
_diffrn_reflns_limit_h_max        11 
_diffrn_reflns_limit_k_min        -17 
_diffrn_reflns_limit_k_max        16 
_diffrn_reflns_limit_l_min        -21 
_diffrn_reflns_limit_l_max        21 
_diffrn_reflns_theta_min          4.106 
_diffrn_reflns_theta_max          79.738 
_diffrn_reflns_theta_full         67.687 
_diffrn_measured_fraction_theta_max   0.989 
_diffrn_measured_fraction_theta_full  0.999 
_diffrn_reflns_Laue_measured_fraction_max    0.989 
_diffrn_reflns_Laue_measured_fraction_full   0.999 
_diffrn_reflns_point_group_measured_fraction_max   0.978 
_diffrn_reflns_point_group_measured_fraction_full  0.997 
_reflns_number_total              5917 
_reflns_number_gt                 5178 
_reflns_threshold_expression      'I > 2\s(I)' 
_reflns_Friedel_coverage          0.764 
_reflns_Friedel_fraction_max      0.965 
_reflns_Friedel_fraction_full     0.995 
  
_reflns_special_details 
; 
 Reflections were merged by SHELXL according to the crystal 
 class for the calculation of statistics and refinement. 
  
 _reflns_Friedel_fraction is defined as the number of unique 
 Friedel pairs measured divided by the number that would be 
 possible theoretically, ignoring centric projections and 
 systematic absences. 
; 
  
_computing_data_collection        'CrystalClear-SM Expert 2.1 b29 (Rigaku, 2013)' 
_computing_cell_refinement        'CrystalClear-SM Expert 2.1 b29' 
_computing_data_reduction         'CrystalClear-SM Expert 2.1 b29' 
_computing_structure_solution     'SIR2011 (Burla, et al., 2012)' 
_computing_structure_refinement 'SHELXL-2014/7 (Sheldrick, 2014)' 
_computing_molecular_graphics     'CrystalStructure 4.1' 
_computing_publication_material   'CrystalStructure 4.1 (Rigaku, 2014)' 
_refine_special_details            
; 
    ENTER TEXT OF LETTER 
; 
_refine_ls_structure_factor_coef  Fsqd 
_refine_ls_matrix_type            full 
_refine_ls_weighting_scheme       calc 
_refine_ls_weighting_details 
'w=1/[\s^2^(Fo^2^)+(0.0823P)^2^] where P=(Fo^2^+2Fc^2^)/3' 
_atom_sites_solution_primary      direct 
_atom_sites_solution_secondary    difmap 
_atom_sites_solution_hydrogens    geom 
_refine_ls_hydrogen_treatment     constr 
_refine_ls_extinction_method      none 
_refine_ls_extinction_coef        . 
_refine_ls_abs_structure_details 
; 
 Flack x determined using 2081 quotients [(I+)-(I-)]/[(I+)+(I-)] 
 (Parsons, Flack and Wagner, Acta Cryst. B69 (2013) 249-259). 
; 
_refine_ls_abs_structure_Flack    0.17(8) 
_chemical_absolute_configuration  rmad 
_refine_ls_number_reflns          5917 
_refine_ls_number_parameters      325 
_refine_ls_number_restraints      0 
_refine_ls_R_factor_all           0.0501 
_refine_ls_R_factor_gt            0.0424 
_refine_ls_wR_factor_ref          0.1145 
_refine_ls_wR_factor_gt           0.1094 
_refine_ls_goodness_of_fit_ref    1.028 
_refine_ls_restrained_S_all       1.028 
_refine_ls_shift/su_max           0.001 
_refine_ls_shift/su_mean          0.000 
  
loop_ 
 _atom_site_label 
 _atom_site_type_symbol 
 _atom_site_fract_x 
 _atom_site_fract_y 
 _atom_site_fract_z 
 _atom_site_U_iso_or_equiv 
 _atom_site_adp_type 
 _atom_site_occupancy 
 _atom_site_site_symmetry_order 
 _atom_site_calc_flag 
 _atom_site_refinement_flags_posn 
 _atom_site_refinement_flags_adp 
 _atom_site_refinement_flags_occupancy 
 _atom_site_disorder_assembly 
 _atom_site_disorder_group 
O1 O 0.35556(14) 0.17865(14) 0.97522(10) 0.0442(4) Uani 1 1 d . . . . . 
O2 O 0.63553(15) 0.38554(13) 1.07809(13) 0.0495(4) Uani 1 1 d . . . . . 
H2 H 0.6443 0.4189 1.1187 0.059 Uiso 1 1 calc R U . . . 
O3 O 0.17055(12) 0.17470(11) 1.13825(9) 0.0345(3) Uani 1 1 d . . . . . 
O4 O -0.27210(14) -0.14044(12) 1.41557(12) 0.0457(4) Uani 1 1 d . . . . . 
H4 H -0.2285 -0.1877 1.4086 0.055 Uiso 1 1 calc R U . . . 
C1 C 0.42365(18) 0.19306(17) 1.02790(13) 0.0361(5) Uani 1 1 d . . . . . 
C2 C 0.5218(2) 0.2611(2) 1.01686(16) 0.0488(6) Uani 1 1 d . . . . . 
H2A H 0.5035 0.3072 0.9745 0.059 Uiso 1 1 calc R U . . . 
H2B H 0.5901 0.2241 1.0009 0.059 Uiso 1 1 calc R U . . . 
C3 C 0.54760(18) 0.31627(17) 1.09077(15) 0.0402(5) Uani 1 1 d . . . . . 
H3 H 0.4772 0.3536 1.1038 0.048 Uiso 1 1 calc R U . . . 
C4 C 0.57135(17) 0.25034(17) 1.16099(15) 0.0384(5) Uani 1 1 d . . . . . 
C5 C 0.48211(17) 0.17034(16) 1.16515(14) 0.0352(4) Uani 1 1 d . . . . . 
C6 C 0.46625(18) 0.12001(18) 1.24280(15) 0.0415(5) Uani 1 1 d . . . . . 
H6A H 0.5285 0.1393 1.2786 0.050 Uiso 1 1 calc R U . . . 
H6B H 0.4715 0.0494 1.2348 0.050 Uiso 1 1 calc R U . . . 
C7 C 0.35059(18) 0.14415(18) 1.28122(13) 0.0381(5) Uani 1 1 d . . . . . 
H7A H 0.3578 0.1365 1.3385 0.046 Uiso 1 1 calc R U . . . 
H7B H 0.3319 0.2126 1.2705 0.046 Uiso 1 1 calc R U . . . 
C8 C 0.25197(16) 0.08033(14) 1.25207(12) 0.0310(4) Uani 1 1 d . . . . . 
H8 H 0.2780 0.0124 1.2606 0.037 Uiso 1 1 calc R U . . . 
C9 C 0.23112(17) 0.08879(15) 1.16405(12) 0.0312(4) Uani 1 1 d . . . . . 
C10 C 0.32959(19) 0.06306(17) 1.11054(14) 0.0372(5) Uani 1 1 d . . . . . 
H10A H 0.3674 0.0042 1.1306 0.045 Uiso 1 1 calc R U . . . 
H10B H 0.2995 0.0483 1.0578 0.045 Uiso 1 1 calc R U . . . 
C11 C 0.41680(18) 0.14331(16) 1.10410(14) 0.0344(4) Uani 1 1 d . . . . . 
C12 C 0.11399(17) 0.08108(16) 1.13292(13) 0.0337(4) Uani 1 1 d . . . . . 
H12 H 0.1081 0.0538 1.0789 0.040 Uiso 1 1 calc R U . . . 
C13 C 0.01068(17) 0.06420(17) 1.18463(12) 0.0339(4) Uani 1 1 d . . . . . 
H13A H -0.0416 0.0182 1.1587 0.041 Uiso 1 1 calc R U . . . 
H13B H -0.0306 0.1258 1.1921 0.041 Uiso 1 1 calc R U . . . 
C14 C 0.04638(16) 0.02362(14) 1.26463(12) 0.0291(4) Uani 1 1 d . . . . . 
C15 C 0.14142(16) 0.09031(15) 1.30009(12) 0.0296(4) Uani 1 1 d . . . . . 
C16 C 0.15148(18) 0.05129(17) 1.38374(13) 0.0356(5) Uani 1 1 d . . . . . 
H16A H 0.1843 0.1005 1.4191 0.043 Uiso 1 1 calc R U . . . 
H16B H 0.1999 -0.0072 1.3853 0.043 Uiso 1 1 calc R U . . . 
C17 C 0.02742(19) 0.02728(17) 1.40706(13) 0.0368(5) Uani 1 1 d . . . . . 
H17A H -0.0026 0.0772 1.4429 0.044 Uiso 1 1 calc R U . . . 
H17B H 0.0243 -0.0359 1.4340 0.044 Uiso 1 1 calc R U . . . 
C18 C -0.04484(17) 0.02412(15) 1.33065(12) 0.0296(4) Uani 1 1 d . . . . . 
H18 H -0.0876 0.0864 1.3269 0.036 Uiso 1 1 calc R U . . . 
C19 C -0.13311(17) -0.05822(15) 1.33183(13) 0.0317(4) Uani 1 1 d . . . . . 
H19 H -0.0898 -0.1202 1.3353 0.038 Uiso 1 1 calc R U . . . 
C20 C -0.20934(18) -0.05219(16) 1.40493(14) 0.0345(4) Uani 1 1 d . . . . . 
H20 H -0.1594 -0.0423 1.4516 0.041 Uiso 1 1 calc R U . . . 
C21 C -0.29792(19) 0.02837(17) 1.40319(14) 0.0385(5) Uani 1 1 d . . . . . 
H21A H -0.3668 0.0050 1.3756 0.046 Uiso 1 1 calc R U . . . 
H21B H -0.2670 0.0836 1.3733 0.046 Uiso 1 1 calc R U . . . 
C22 C -0.3318(2) 0.0630(2) 1.48557(16) 0.0489(6) Uani 1 1 d . . . . . 
H22 H -0.3378 0.0049 1.5199 0.059 Uiso 1 1 calc R U . . . 
C23 C -0.2406(3) 0.1273(3) 1.51894(19) 0.0660(9) Uani 1 1 d . . . . . 
C24 C -0.1748(4) 0.0986(5) 1.5772(2) 0.0955(15) Uani 1 1 d . . . . . 
H24A H -0.1174 0.1404 1.5970 0.115 Uiso 1 1 calc R U . . . 
H24B H -0.1849 0.0363 1.5993 0.115 Uiso 1 1 calc R U . . . 
C25 C 0.68936(19) 0.2025(2) 1.1550(2) 0.0535(7) Uani 1 1 d . . . . . 
H25A H 0.7487 0.2521 1.1579 0.064 Uiso 1 1 calc R U . . . 
H25B H 0.6955 0.1681 1.1051 0.064 Uiso 1 1 calc R U . . . 
H25C H 0.6991 0.1567 1.1982 0.064 Uiso 1 1 calc R U . . . 
C26 C 0.5683(3) 0.3141(2) 1.23468(18) 0.0568(7) Uani 1 1 d . . . . . 
H26A H 0.6190 0.3696 1.2275 0.068 Uiso 1 1 calc R U . . . 
H26B H 0.5937 0.2764 1.2799 0.068 Uiso 1 1 calc R U . . . 
H26C H 0.4904 0.3369 1.2436 0.068 Uiso 1 1 calc R U . . . 
C27 C 0.09010(18) -0.08024(15) 1.25211(14) 0.0364(4) Uani 1 1 d . . . . . 
H27A H 0.1197 -0.1057 1.3016 0.044 Uiso 1 1 calc R U . . . 
H27B H 0.1510 -0.0799 1.2129 0.044 Uiso 1 1 calc R U . . . 
H27C H 0.0274 -0.1211 1.2339 0.044 Uiso 1 1 calc R U . . . 
C28 C 0.10311(18) 0.19657(15) 1.30683(13) 0.0342(4) Uani 1 1 d . . . . . 
H28A H 0.0929 0.2237 1.2544 0.041 Uiso 1 1 calc R U . . . 
H28B H 0.1612 0.2336 1.3350 0.041 Uiso 1 1 calc R U . . . 
H28C H 0.0308 0.1998 1.3354 0.041 Uiso 1 1 calc R U . . . 
C29 C -0.20636(18) -0.06332(17) 1.25781(14) 0.0381(5) Uani 1 1 d . . . . . 
H29A H -0.2681 -0.1100 1.2656 0.046 Uiso 1 1 calc R U . . . 
H29B H -0.1591 -0.0837 1.2136 0.046 Uiso 1 1 calc R U . . . 
H29C H -0.2388 0.0005 1.2469 0.046 Uiso 1 1 calc R U . . . 
C30 C -0.4491(3) 0.1115(3) 1.4835(2) 0.0695(9) Uani 1 1 d . . . . . 
H30A H -0.5068 0.0640 1.4680 0.083 Uiso 1 1 calc R U . . . 
H30B H -0.4481 0.1645 1.4456 0.083 Uiso 1 1 calc R U . . . 
H30C H -0.4674 0.1369 1.5355 0.083 Uiso 1 1 calc R U . . . 
C31 C -0.2268(5) 0.2252(4) 1.4829(3) 0.1034(16) Uani 1 1 d . . . . . 
H31A H -0.2990 0.2604 1.4862 0.124 Uiso 1 1 calc R U . . . 
H31B H -0.2048 0.2181 1.4279 0.124 Uiso 1 1 calc R U . . . 
H31C H -0.1675 0.2610 1.5109 0.124 Uiso 1 1 calc R U . . . 
  
loop_ 
 _atom_site_aniso_label 
 _atom_site_aniso_U_11 
 _atom_site_aniso_U_22 
 _atom_site_aniso_U_33 
 _atom_site_aniso_U_23 
 _atom_site_aniso_U_13 
 _atom_site_aniso_U_12 
O1 0.0387(8) 0.0493(10) 0.0445(8) -0.0064(7) 0.0040(7) -0.0024(7) 
O2 0.0360(8) 0.0367(9) 0.0758(12) 0.0060(8) 0.0023(8) -0.0099(7) 
O3 0.0333(7) 0.0295(8) 0.0407(7) 0.0074(6) -0.0011(6) -0.0016(6) 
O4 0.0351(8) 0.0283(8) 0.0737(11) 0.0073(8) 0.0125(8) -0.0035(6) 
C1 0.0308(10) 0.0349(12) 0.0425(11) -0.0059(9) 0.0091(8) 0.0021(9) 
C2 0.0379(12) 0.0562(16) 0.0524(14) 0.0071(12) 0.0097(10) -0.0103(11) 
C3 0.0259(9) 0.0312(12) 0.0635(14) 0.0038(10) 0.0044(9) -0.0020(8) 
C4 0.0259(10) 0.0324(11) 0.0569(13) 0.0005(10) 0.0014(9) -0.0019(8) 
C5 0.0246(9) 0.0287(11) 0.0522(12) 0.0003(9) 0.0029(8) 0.0019(8) 
C6 0.0272(10) 0.0411(13) 0.0561(13) 0.0088(10) -0.0073(9) -0.0036(9) 
C7 0.0292(10) 0.0420(12) 0.0432(11) 0.0030(9) -0.0056(8) -0.0072(9) 
C8 0.0270(9) 0.0226(9) 0.0433(11) 0.0044(8) -0.0027(8) -0.0004(7) 
C9 0.0292(9) 0.0231(9) 0.0413(10) -0.0002(8) 0.0008(8) -0.0035(8) 
C10 0.0333(10) 0.0294(11) 0.0490(12) -0.0064(9) 0.0040(9) -0.0054(9) 
C11 0.0272(9) 0.0266(10) 0.0493(11) -0.0029(9) 0.0078(8) -0.0004(8) 
C12 0.0329(10) 0.0312(11) 0.0370(10) 0.0015(8) -0.0037(8) -0.0037(8) 
C13 0.0285(9) 0.0363(11) 0.0368(10) 0.0029(9) -0.0048(8) -0.0023(8) 
C14 0.0262(9) 0.0220(9) 0.0392(10) 0.0025(7) -0.0037(8) -0.0010(7) 
C15 0.0272(9) 0.0243(9) 0.0372(10) 0.0035(8) -0.0037(7) -0.0018(7) 
C16 0.0321(10) 0.0367(11) 0.0381(11) 0.0072(9) -0.0069(8) -0.0048(8) 
C17 0.0349(11) 0.0377(12) 0.0379(10) 0.0075(9) -0.0024(8) -0.0040(9) 
C18 0.0279(9) 0.0219(9) 0.0392(10) 0.0025(8) -0.0028(8) -0.0007(7) 
C19 0.0294(9) 0.0215(9) 0.0443(10) 0.0010(8) 0.0014(8) -0.0008(7) 
C20 0.0298(10) 0.0272(10) 0.0466(11) 0.0038(9) 0.0020(8) -0.0039(8) 
C21 0.0352(11) 0.0320(11) 0.0483(12) 0.0027(9) 0.0058(9) 0.0012(8) 
C22 0.0461(13) 0.0474(14) 0.0534(14) -0.0004(11) 0.0157(11) 0.0028(11) 
C23 0.0645(18) 0.076(2) 0.0579(17) -0.0273(15) 0.0192(15) -0.0043(16) 
C24 0.074(2) 0.152(4) 0.061(2) -0.041(2) 0.0090(17) 0.001(3) 
C25 0.0287(11) 0.0431(14) 0.089(2) 0.0145(13) -0.0015(11) 0.0002(10) 
C26 0.0530(15) 0.0546(17) 0.0628(16) -0.0087(12) 0.0007(12) -0.0214(13) 
C27 0.0322(9) 0.0242(10) 0.0527(12) -0.0002(9) 0.0033(9) -0.0017(8) 
C28 0.0353(10) 0.0250(10) 0.0421(11) -0.0004(8) 0.0017(8) -0.0026(8) 
C29 0.0328(10) 0.0328(11) 0.0488(12) -0.0061(9) -0.0014(8) -0.0053(8) 
C30 0.0581(17) 0.074(2) 0.076(2) -0.0053(16) 0.0246(15) 0.0165(15) 
C31 0.125(4) 0.071(3) 0.115(3) -0.040(2) 0.029(3) -0.034(3) 
  
_geom_special_details 
; 
 All esds (except the esd in the dihedral angle between two l.s. planes) 
 are estimated using the full covariance matrix.  The cell esds are taken 
 into account individually in the estimation of esds in distances, angles 
 and torsion angles; correlations between esds in cell parameters are only 
 used when they are defined by crystal symmetry.  An approximate (isotropic) 
 treatment of cell esds is used for estimating esds involving l.s. planes. 
; 
  
loop_ 
 _geom_bond_atom_site_label_1 
 _geom_bond_atom_site_label_2 
 _geom_bond_distance 
 _geom_bond_site_symmetry_2 
 _geom_bond_publ_flag 
O1 C1 1.221(3) . ? 
O2 C3 1.426(3) . ? 
O2 H2 0.8400 . ? 
O3 C9 1.455(3) . ? 
O3 C12 1.460(3) . ? 
O4 C20 1.439(3) . ? 
O4 H4 0.8400 . ? 
C1 C11 1.477(3) . ? 
C1 C2 1.501(3) . ? 
C2 C3 1.508(4) . ? 
C2 H2A 0.9900 . ? 
C2 H2B 0.9900 . ? 
C3 C4 1.535(3) . ? 
C3 H3 1.0000 . ? 
C4 C5 1.527(3) . ? 
C4 C25 1.539(3) . ? 
C4 C26 1.540(4) . ? 
C5 C11 1.348(3) . ? 
C5 C6 1.512(3) . ? 
C6 C7 1.545(3) . ? 
C6 H6A 0.9900 . ? 
C6 H6B 0.9900 . ? 
C7 C8 1.540(3) . ? 
C7 H7A 0.9900 . ? 
C7 H7B 0.9900 . ? 
C8 C9 1.530(3) . ? 
C8 C15 1.542(3) . ? 
C8 H8 1.0000 . ? 
C9 C12 1.478(3) . ? 
C9 C10 1.517(3) . ? 
C10 C11 1.515(3) . ? 
C10 H10A 0.9900 . ? 
C10 H10B 0.9900 . ? 
C12 C13 1.519(3) . ? 
C12 H12 1.0000 . ? 
C13 C14 1.538(3) . ? 
C13 H13A 0.9900 . ? 
C13 H13B 0.9900 . ? 
C14 C27 1.543(3) . ? 
C14 C18 1.556(3) . ? 
C14 C15 1.570(3) . ? 
C15 C16 1.534(3) . ? 
C15 C28 1.544(3) . ? 
C16 C17 1.546(3) . ? 
C16 H16A 0.9900 . ? 
C16 H16B 0.9900 . ? 
C17 C18 1.559(3) . ? 
C17 H17A 0.9900 . ? 
C17 H17B 0.9900 . ? 
C18 C19 1.541(3) . ? 
C18 H18 1.0000 . ? 
C19 C29 1.532(3) . ? 
C19 C20 1.540(3) . ? 
C19 H19 1.0000 . ? 
C20 C21 1.526(3) . ? 
C20 H20 1.0000 . ? 
C21 C22 1.541(4) . ? 
C21 H21A 0.9900 . ? 
C21 H21B 0.9900 . ? 
C22 C23 1.504(5) . ? 
C22 C30 1.532(4) . ? 
C22 H22 1.0000 . ? 
C23 C24 1.322(6) . ? 
C23 C31 1.499(7) . ? 
C24 H24A 0.9500 . ? 
C24 H24B 0.9500 . ? 
C25 H25A 0.9800 . ? 
C25 H25B 0.9800 . ? 
C25 H25C 0.9800 . ? 
C26 H26A 0.9800 . ? 
C26 H26B 0.9800 . ? 
C26 H26C 0.9800 . ? 
C27 H27A 0.9800 . ? 
C27 H27B 0.9800 . ? 
C27 H27C 0.9800 . ? 
C28 H28A 0.9800 . ? 
C28 H28B 0.9800 . ? 
C28 H28C 0.9800 . ? 
C29 H29A 0.9800 . ? 
C29 H29B 0.9800 . ? 
C29 H29C 0.9800 . ? 
C30 H30A 0.9800 . ? 
C30 H30B 0.9800 . ? 
C30 H30C 0.9800 . ? 
C31 H31A 0.9800 . ? 
C31 H31B 0.9800 . ? 
C31 H31C 0.9800 . ? 
  
loop_ 
 _geom_angle_atom_site_label_1 
 _geom_angle_atom_site_label_2 
 _geom_angle_atom_site_label_3 
 _geom_angle 
 _geom_angle_site_symmetry_1 
 _geom_angle_site_symmetry_3 
 _geom_angle_publ_flag 
C3 O2 H2 109.5 . . ? 
C9 O3 C12 60.94(13) . . ? 
C20 O4 H4 109.5 . . ? 
O1 C1 C11 122.7(2) . . ? 
O1 C1 C2 120.8(2) . . ? 
C11 C1 C2 116.5(2) . . ? 
C1 C2 C3 111.53(19) . . ? 
C1 C2 H2A 109.3 . . ? 
C3 C2 H2A 109.3 . . ? 
C1 C2 H2B 109.3 . . ? 
C3 C2 H2B 109.3 . . ? 
H2A C2 H2B 108.0 . . ? 
O2 C3 C2 111.0(2) . . ? 
O2 C3 C4 112.85(19) . . ? 
C2 C3 C4 113.0(2) . . ? 
O2 C3 H3 106.5 . . ? 
C2 C3 H3 106.5 . . ? 
C4 C3 H3 106.5 . . ? 
C5 C4 C3 110.12(19) . . ? 
C5 C4 C25 107.91(19) . . ? 
C3 C4 C25 111.6(2) . . ? 
C5 C4 C26 111.27(19) . . ? 
C3 C4 C26 107.2(2) . . ? 
C25 C4 C26 108.8(2) . . ? 
C11 C5 C6 118.83(19) . . ? 
C11 C5 C4 123.8(2) . . ? 
C6 C5 C4 117.4(2) . . ? 
C5 C6 C7 112.46(18) . . ? 
C5 C6 H6A 109.1 . . ? 
C7 C6 H6A 109.1 . . ? 
C5 C6 H6B 109.1 . . ? 
C7 C6 H6B 109.1 . . ? 
H6A C6 H6B 107.8 . . ? 
C8 C7 C6 113.49(19) . . ? 
C8 C7 H7A 108.9 . . ? 
C6 C7 H7A 108.9 . . ? 
C8 C7 H7B 108.9 . . ? 
C6 C7 H7B 108.9 . . ? 
H7A C7 H7B 107.7 . . ? 
C9 C8 C7 113.26(17) . . ? 
C9 C8 C15 112.51(16) . . ? 
C7 C8 C15 114.12(18) . . ? 
C9 C8 H8 105.3 . . ? 
C7 C8 H8 105.3 . . ? 
C15 C8 H8 105.3 . . ? 
O3 C9 C12 59.70(13) . . ? 
O3 C9 C10 112.43(17) . . ? 
C12 C9 C10 118.32(18) . . ? 
O3 C9 C8 116.06(17) . . ? 
C12 C9 C8 119.84(17) . . ? 
C10 C9 C8 117.00(18) . . ? 
C11 C10 C9 112.71(18) . . ? 
C11 C10 H10A 109.0 . . ? 
C9 C10 H10A 109.0 . . ? 
C11 C10 H10B 109.0 . . ? 
C9 C10 H10B 109.0 . . ? 
H10A C10 H10B 107.8 . . ? 
C5 C11 C1 121.5(2) . . ? 
C5 C11 C10 122.1(2) . . ? 
C1 C11 C10 116.3(2) . . ? 
O3 C12 C9 59.36(13) . . ? 
O3 C12 C13 117.61(18) . . ? 
C9 C12 C13 122.95(18) . . ? 
O3 C12 H12 115.1 . . ? 
C9 C12 H12 115.1 . . ? 
C13 C12 H12 115.1 . . ? 
C12 C13 C14 110.91(16) . . ? 
C12 C13 H13A 109.5 . . ? 
C14 C13 H13A 109.5 . . ? 
C12 C13 H13B 109.5 . . ? 
C14 C13 H13B 109.5 . . ? 
H13A C13 H13B 108.0 . . ? 
C13 C14 C27 107.95(18) . . ? 
C13 C14 C18 117.17(16) . . ? 
C27 C14 C18 109.50(16) . . ? 
C13 C14 C15 108.80(16) . . ? 
C27 C14 C15 111.48(16) . . ? 
C18 C14 C15 101.88(16) . . ? 
C16 C15 C8 113.61(16) . . ? 
C16 C15 C28 106.79(18) . . ? 
C8 C15 C28 111.74(16) . . ? 
C16 C15 C14 101.98(16) . . ? 
C8 C15 C14 109.83(17) . . ? 
C28 C15 C14 112.52(16) . . ? 
C15 C16 C17 104.12(16) . . ? 
C15 C16 H16A 110.9 . . ? 
C17 C16 H16A 110.9 . . ? 
C15 C16 H16B 110.9 . . ? 
C17 C16 H16B 110.9 . . ? 
H16A C16 H16B 109.0 . . ? 
C16 C17 C18 107.59(17) . . ? 
C16 C17 H17A 110.2 . . ? 
C18 C17 H17A 110.2 . . ? 
C16 C17 H17B 110.2 . . ? 
C18 C17 H17B 110.2 . . ? 
H17A C17 H17B 108.5 . . ? 
C19 C18 C14 117.96(17) . . ? 
C19 C18 C17 112.06(17) . . ? 
C14 C18 C17 103.55(16) . . ? 
C19 C18 H18 107.6 . . ? 
C14 C18 H18 107.6 . . ? 
C17 C18 H18 107.6 . . ? 
C29 C19 C20 110.34(17) . . ? 
C29 C19 C18 113.61(18) . . ? 
C20 C19 C18 111.17(17) . . ? 
C29 C19 H19 107.1 . . ? 
C20 C19 H19 107.1 . . ? 
C18 C19 H19 107.1 . . ? 
O4 C20 C21 105.98(17) . . ? 
O4 C20 C19 110.73(18) . . ? 
C21 C20 C19 114.82(18) . . ? 
O4 C20 H20 108.4 . . ? 
C21 C20 H20 108.4 . . ? 
C19 C20 H20 108.4 . . ? 
C20 C21 C22 112.7(2) . . ? 
C20 C21 H21A 109.1 . . ? 
C22 C21 H21A 109.1 . . ? 
C20 C21 H21B 109.1 . . ? 
C22 C21 H21B 109.1 . . ? 
H21A C21 H21B 107.8 . . ? 
C23 C22 C30 112.9(3) . . ? 
C23 C22 C21 110.4(2) . . ? 
C30 C22 C21 110.3(2) . . ? 
C23 C22 H22 107.7 . . ? 
C30 C22 H22 107.7 . . ? 
C21 C22 H22 107.7 . . ? 
C24 C23 C31 121.3(4) . . ? 
C24 C23 C22 121.6(4) . . ? 
C31 C23 C22 117.1(4) . . ? 
C23 C24 H24A 120.0 . . ? 
C23 C24 H24B 120.0 . . ? 
H24A C24 H24B 120.0 . . ? 
C4 C25 H25A 109.5 . . ? 
C4 C25 H25B 109.5 . . ? 
H25A C25 H25B 109.5 . . ? 
C4 C25 H25C 109.5 . . ? 
H25A C25 H25C 109.5 . . ? 
H25B C25 H25C 109.5 . . ? 
C4 C26 H26A 109.5 . . ? 
C4 C26 H26B 109.5 . . ? 
H26A C26 H26B 109.5 . . ? 
C4 C26 H26C 109.5 . . ? 
H26A C26 H26C 109.5 . . ? 
H26B C26 H26C 109.5 . . ? 
C14 C27 H27A 109.5 . . ? 
C14 C27 H27B 109.5 . . ? 
H27A C27 H27B 109.5 . . ? 
C14 C27 H27C 109.5 . . ? 
H27A C27 H27C 109.5 . . ? 
H27B C27 H27C 109.5 . . ? 
C15 C28 H28A 109.5 . . ? 
C15 C28 H28B 109.5 . . ? 
H28A C28 H28B 109.5 . . ? 
C15 C28 H28C 109.5 . . ? 
H28A C28 H28C 109.5 . . ? 
H28B C28 H28C 109.5 . . ? 
C19 C29 H29A 109.5 . . ? 
C19 C29 H29B 109.5 . . ? 
H29A C29 H29B 109.5 . . ? 
C19 C29 H29C 109.5 . . ? 
H29A C29 H29C 109.5 . . ? 
H29B C29 H29C 109.5 . . ? 
C22 C30 H30A 109.5 . . ? 
C22 C30 H30B 109.5 . . ? 
H30A C30 H30B 109.5 . . ? 
C22 C30 H30C 109.5 . . ? 
H30A C30 H30C 109.5 . . ? 
H30B C30 H30C 109.5 . . ? 
C23 C31 H31A 109.5 . . ? 
C23 C31 H31B 109.5 . . ? 
H31A C31 H31B 109.5 . . ? 
C23 C31 H31C 109.5 . . ? 
H31A C31 H31C 109.5 . . ? 
H31B C31 H31C 109.5 . . ? 
  
loop_ 
 _geom_torsion_atom_site_label_1 
 _geom_torsion_atom_site_label_2 
 _geom_torsion_atom_site_label_3 
 _geom_torsion_atom_site_label_4 
 _geom_torsion 
 _geom_torsion_site_symmetry_1 
 _geom_torsion_site_symmetry_2 
 _geom_torsion_site_symmetry_3 
 _geom_torsion_site_symmetry_4 
 _geom_torsion_publ_flag 
O1 C1 C2 C3 143.8(2) . . . . ? 
C11 C1 C2 C3 -38.0(3) . . . . ? 
C1 C2 C3 O2 -175.8(2) . . . . ? 
C1 C2 C3 C4 56.2(3) . . . . ? 
O2 C3 C4 C5 -172.94(19) . . . . ? 
C2 C3 C4 C5 -45.9(2) . . . . ? 
O2 C3 C4 C25 -53.1(3) . . . . ? 
C2 C3 C4 C25 73.9(3) . . . . ? 
O2 C3 C4 C26 65.9(2) . . . . ? 
C2 C3 C4 C26 -167.1(2) . . . . ? 
C3 C4 C5 C11 19.7(3) . . . . ? 
C25 C4 C5 C11 -102.4(3) . . . . ? 
C26 C4 C5 C11 138.3(2) . . . . ? 
C3 C4 C5 C6 -159.7(2) . . . . ? 
C25 C4 C5 C6 78.3(3) . . . . ? 
C26 C4 C5 C6 -41.0(3) . . . . ? 
C11 C5 C6 C7 -68.7(3) . . . . ? 
C4 C5 C6 C7 110.7(2) . . . . ? 
C5 C6 C7 C8 84.6(2) . . . . ? 
C6 C7 C8 C9 -60.2(3) . . . . ? 
C6 C7 C8 C15 169.34(17) . . . . ? 
C12 O3 C9 C10 110.7(2) . . . . ? 
C12 O3 C9 C8 -110.84(19) . . . . ? 
C7 C8 C9 O3 -77.6(2) . . . . ? 
C15 C8 C9 O3 53.7(2) . . . . ? 
C7 C8 C9 C12 -146.0(2) . . . . ? 
C15 C8 C9 C12 -14.8(3) . . . . ? 
C7 C8 C9 C10 59.0(2) . . . . ? 
C15 C8 C9 C10 -169.74(17) . . . . ? 
O3 C9 C10 C11 59.0(2) . . . . ? 
C12 C9 C10 C11 125.5(2) . . . . ? 
C8 C9 C10 C11 -79.1(2) . . . . ? 
C6 C5 C11 C1 176.65(19) . . . . ? 
C4 C5 C11 C1 -2.7(3) . . . . ? 
C6 C5 C11 C10 -1.1(3) . . . . ? 
C4 C5 C11 C10 179.63(19) . . . . ? 
O1 C1 C11 C5 -170.1(2) . . . . ? 
C2 C1 C11 C5 11.8(3) . . . . ? 
O1 C1 C11 C10 7.7(3) . . . . ? 
C2 C1 C11 C10 -170.4(2) . . . . ? 
C9 C10 C11 C5 67.1(3) . . . . ? 
C9 C10 C11 C1 -110.8(2) . . . . ? 
C9 O3 C12 C13 113.8(2) . . . . ? 
C10 C9 C12 O3 -100.8(2) . . . . ? 
C8 C9 C12 O3 104.6(2) . . . . ? 
O3 C9 C12 C13 -104.9(2) . . . . ? 
C10 C9 C12 C13 154.3(2) . . . . ? 
C8 C9 C12 C13 -0.4(3) . . . . ? 
O3 C12 C13 C14 -88.6(2) . . . . ? 
C9 C12 C13 C14 -18.9(3) . . . . ? 
C12 C13 C14 C27 -69.4(2) . . . . ? 
C12 C13 C14 C18 166.51(18) . . . . ? 
C12 C13 C14 C15 51.7(2) . . . . ? 
C9 C8 C15 C16 161.75(18) . . . . ? 
C7 C8 C15 C16 -67.4(2) . . . . ? 
C9 C8 C15 C28 -77.3(2) . . . . ? 
C7 C8 C15 C28 53.5(2) . . . . ? 
C9 C8 C15 C14 48.3(2) . . . . ? 
C7 C8 C15 C14 179.10(17) . . . . ? 
C13 C14 C15 C16 170.36(17) . . . . ? 
C27 C14 C15 C16 -70.7(2) . . . . ? 
C18 C14 C15 C16 46.00(18) . . . . ? 
C13 C14 C15 C8 -68.9(2) . . . . ? 
C27 C14 C15 C8 50.1(2) . . . . ? 
C18 C14 C15 C8 166.78(15) . . . . ? 
C13 C14 C15 C28 56.3(2) . . . . ? 
C27 C14 C15 C28 175.24(17) . . . . ? 
C18 C14 C15 C28 -68.06(19) . . . . ? 
C8 C15 C16 C17 -156.20(18) . . . . ? 
C28 C15 C16 C17 80.1(2) . . . . ? 
C14 C15 C16 C17 -38.1(2) . . . . ? 
C15 C16 C17 C18 16.2(2) . . . . ? 
C13 C14 C18 C19 81.6(2) . . . . ? 
C27 C14 C18 C19 -41.7(2) . . . . ? 
C15 C14 C18 C19 -159.85(17) . . . . ? 
C13 C14 C18 C17 -153.99(18) . . . . ? 
C27 C14 C18 C17 82.70(19) . . . . ? 
C15 C14 C18 C17 -35.43(18) . . . . ? 
C16 C17 C18 C19 140.57(18) . . . . ? 
C16 C17 C18 C14 12.4(2) . . . . ? 
C14 C18 C19 C29 -60.3(2) . . . . ? 
C17 C18 C19 C29 179.67(18) . . . . ? 
C14 C18 C19 C20 174.57(17) . . . . ? 
C17 C18 C19 C20 54.5(2) . . . . ? 
C29 C19 C20 O4 66.8(2) . . . . ? 
C18 C19 C20 O4 -166.18(17) . . . . ? 
C29 C19 C20 C21 -53.1(2) . . . . ? 
C18 C19 C20 C21 73.9(2) . . . . ? 
O4 C20 C21 C22 84.2(2) . . . . ? 
C19 C20 C21 C22 -153.2(2) . . . . ? 
C20 C21 C22 C23 77.1(3) . . . . ? 
C20 C21 C22 C30 -157.5(2) . . . . ? 
C30 C22 C23 C24 126.8(3) . . . . ? 
C21 C22 C23 C24 -109.2(3) . . . . ? 
C30 C22 C23 C31 -53.6(4) . . . . ? 
C21 C22 C23 C31 70.3(4) . . . . ? 
  
_refine_diff_density_max    0.358 
_refine_diff_density_min   -0.280 
_refine_diff_density_rms    0.041 
  
_shelx_res_file 
; 
  
    shelxl.res created by SHELXL-2014/7 
  
TITL P20150416b1 
CELL  1.54187 11.73800 13.85600 17.10600 90.00000 90.00000 90.00000 
ZERR  4 0.00300 0.00300 0.00300 0.00000 0.00000 0.00000 
LATT -1 
SYMM .50+X, .50-Y,    -Z 
SYMM    -X, .50+Y, .50-Z 
SYMM .50-X,    -Y, .50+Z 
SFAC C H O 
UNIT 124 192 16 
L.S. 5 
FMAP 2 
PLAN -5 
WPDB -2 
HTAB 
BOND $H 
CONF 
LIST 4 
TEMP -100.0 
ACTA 
SIZE 0.240 0.220 0.200 
WGHT    0.082300 
FVAR       0.50382 
O1    3    0.355559    0.178651    0.975216    11.00000    0.03868    0.04931 = 
         0.04451   -0.00637    0.00405   -0.00243 
O2    3    0.635526    0.385536    1.078087    11.00000    0.03599    0.03669 = 
         0.07577    0.00602    0.00230   -0.00988 
AFIX 147 
H2    2    0.644329    0.418865    1.118659    11.00000   -1.20000 
AFIX   0 
O3    3    0.170554    0.174703    1.138248    11.00000    0.03332    0.02954 = 
         0.04072    0.00738   -0.00108   -0.00161 
O4    3   -0.272097   -0.140440    1.415573    11.00000    0.03506    0.02827 = 
         0.07374    0.00732    0.01248   -0.00353 
AFIX 147 
H4    2   -0.228506   -0.187747    1.408626    11.00000   -1.20000 
AFIX   0 
C1    1    0.423645    0.193057    1.027897    11.00000    0.03077    0.03489 = 
         0.04251   -0.00587    0.00910    0.00212 
C2    1    0.521824    0.261097    1.016863    11.00000    0.03785    0.05620 = 
         0.05244    0.00713    0.00969   -0.01029 
AFIX  23 
H2A   2    0.503530    0.307187    0.974459    11.00000   -1.20000 
H2B   2    0.590121    0.224066    1.000946    11.00000   -1.20000 
AFIX   0 
C3    1    0.547602    0.316265    1.090772    11.00000    0.02591    0.03120 = 
         0.06349    0.00381    0.00436   -0.00200 
AFIX  13 
H3    2    0.477223    0.353613    1.103810    11.00000   -1.20000 
AFIX   0 
C4    1    0.571353    0.250345    1.160994    11.00000    0.02586    0.03237 = 
         0.05694    0.00054    0.00137   -0.00186 
C5    1    0.482111    0.170338    1.165151    11.00000    0.02457    0.02870 = 
         0.05222    0.00033    0.00293    0.00187 
C6    1    0.466246    0.120008    1.242801    11.00000    0.02722    0.04111 = 
         0.05614    0.00878   -0.00733   -0.00363 
AFIX  23 
H6A   2    0.528511    0.139325    1.278566    11.00000   -1.20000 
H6B   2    0.471493    0.049380    1.234829    11.00000   -1.20000 
AFIX   0 
C7    1    0.350593    0.144151    1.281217    11.00000    0.02924    0.04200 = 
         0.04319    0.00302   -0.00563   -0.00719 
AFIX  23 
H7A   2    0.357774    0.136517    1.338549    11.00000   -1.20000 
H7B   2    0.331903    0.212561    1.270520    11.00000   -1.20000 
AFIX   0 
C8    1    0.251967    0.080327    1.252068    11.00000    0.02704    0.02261 = 
         0.04330    0.00437   -0.00274   -0.00042 
AFIX  13 
H8    2    0.277978    0.012407    1.260558    11.00000   -1.20000 
AFIX   0 
C9    1    0.231125    0.088794    1.164050    11.00000    0.02921    0.02310 = 
         0.04134   -0.00020    0.00078   -0.00348 
C10   1    0.329593    0.063059    1.110542    11.00000    0.03332    0.02945 = 
         0.04898   -0.00640    0.00397   -0.00541 
AFIX  23 
H10A  2    0.367445    0.004211    1.130607    11.00000   -1.20000 
H10B  2    0.299496    0.048303    1.057815    11.00000   -1.20000 
AFIX   0 
C11   1    0.416804    0.143309    1.104104    11.00000    0.02716    0.02660 = 
         0.04932   -0.00292    0.00776   -0.00041 
C12   1    0.113992    0.081076    1.132923    11.00000    0.03289    0.03124 = 
         0.03697    0.00155   -0.00371   -0.00373 
AFIX  13 
H12   2    0.108092    0.053844    1.078937    11.00000   -1.20000 
AFIX   0 
C13   1    0.010681    0.064198    1.184629    11.00000    0.02853    0.03631 = 
         0.03683    0.00290   -0.00478   -0.00234 
AFIX  23 
H13A  2   -0.041647    0.018235    1.158666    11.00000   -1.20000 
H13B  2   -0.030558    0.125830    1.192143    11.00000   -1.20000 
AFIX   0 
C14   1    0.046385    0.023618    1.264632    11.00000    0.02622    0.02199 = 
         0.03923    0.00248   -0.00367   -0.00101 
C15   1    0.141423    0.090305    1.300091    11.00000    0.02722    0.02425 = 
         0.03722    0.00346   -0.00365   -0.00182 
C16   1    0.151481    0.051290    1.383743    11.00000    0.03213    0.03668 = 
         0.03808    0.00720   -0.00692   -0.00484 
AFIX  23 
H16A  2    0.184312    0.100526    1.419119    11.00000   -1.20000 
H16B  2    0.199859   -0.007206    1.385272    11.00000   -1.20000 
AFIX   0 
C17   1    0.027423    0.027278    1.407058    11.00000    0.03488    0.03768 = 
         0.03792    0.00747   -0.00242   -0.00398 
AFIX  23 
H17A  2   -0.002648    0.077242    1.442915    11.00000   -1.20000 
H17B  2    0.024306   -0.035913    1.433984    11.00000   -1.20000 
AFIX   0 
C18   1   -0.044835    0.024118    1.330647    11.00000    0.02786    0.02188 = 
         0.03919    0.00246   -0.00279   -0.00069 
AFIX  13 
H18   2   -0.087557    0.086387    1.326900    11.00000   -1.20000 
AFIX   0 
C19   1   -0.133112   -0.058222    1.331833    11.00000    0.02943    0.02145 = 
         0.04425    0.00105    0.00139   -0.00077 
AFIX  13 
H19   2   -0.089767   -0.120209    1.335269    11.00000   -1.20000 
AFIX   0 
C20   1   -0.209336   -0.052192    1.404935    11.00000    0.02980    0.02723 = 
         0.04656    0.00382    0.00197   -0.00392 
AFIX  13 
H20   2   -0.159390   -0.042333    1.451615    11.00000   -1.20000 
AFIX   0 
C21   1   -0.297916    0.028370    1.403187    11.00000    0.03516    0.03201 = 
         0.04830    0.00267    0.00582    0.00121 
AFIX  23 
H21A  2   -0.366778    0.005000    1.375649    11.00000   -1.20000 
H21B  2   -0.267023    0.083635    1.373250    11.00000   -1.20000 
AFIX   0 
C22   1   -0.331794    0.063043    1.485571    11.00000    0.04606    0.04736 = 
         0.05341   -0.00038    0.01566    0.00282 
AFIX  13 
H22   2   -0.337763    0.004856    1.519911    11.00000   -1.20000 
AFIX   0 
C23   1   -0.240613    0.127272    1.518940    11.00000    0.06454    0.07574 = 
         0.05786   -0.02732    0.01919   -0.00431 
C24   1   -0.174805    0.098628    1.577223    11.00000    0.07445    0.15153 = 
         0.06050   -0.04068    0.00902    0.00135 
AFIX  93 
H24A  2   -0.117440    0.140371    1.597010    11.00000   -1.20000 
H24B  2   -0.184888    0.036306    1.599313    11.00000   -1.20000 
AFIX   0 
C25   1    0.689360    0.202457    1.155008    11.00000    0.02874    0.04313 = 
         0.08875    0.01455   -0.00151    0.00017 
AFIX 137 
H25A  2    0.748673    0.252104    1.157917    11.00000   -1.20000 
H25B  2    0.695475    0.168084    1.105115    11.00000   -1.20000 
H25C  2    0.699062    0.156696    1.198180    11.00000   -1.20000 
AFIX   0 
C26   1    0.568338    0.314118    1.234681    11.00000    0.05297    0.05458 = 
         0.06275   -0.00870    0.00074   -0.02139 
AFIX 137 
H26A  2    0.619025    0.369611    1.227474    11.00000   -1.20000 
H26B  2    0.593693    0.276402    1.279914    11.00000   -1.20000 
H26C  2    0.490375    0.336931    1.243552    11.00000   -1.20000 
AFIX   0 
C27   1    0.090101   -0.080242    1.252111    11.00000    0.03218    0.02422 = 
         0.05269   -0.00024    0.00333   -0.00171 
AFIX 137 
H27A  2    0.119691   -0.105666    1.301565    11.00000   -1.20000 
H27B  2    0.151019   -0.079917    1.212936    11.00000   -1.20000 
H27C  2    0.027361   -0.121118    1.233877    11.00000   -1.20000 
AFIX   0 
C28   1    0.103107    0.196570    1.306829    11.00000    0.03535    0.02501 = 
         0.04209   -0.00045    0.00171   -0.00256 
AFIX 137 
H28A  2    0.092935    0.223725    1.254393    11.00000   -1.20000 
H28B  2    0.161221    0.233607    1.334970    11.00000   -1.20000 
H28C  2    0.030845    0.199830    1.335402    11.00000   -1.20000 
AFIX   0 
C29   1   -0.206362   -0.063318    1.257807    11.00000    0.03276    0.03283 = 
         0.04876   -0.00614   -0.00140   -0.00529 
AFIX 137 
H29A  2   -0.268067   -0.109991    1.265558    11.00000   -1.20000 
H29B  2   -0.159052   -0.083674    1.213576    11.00000   -1.20000 
H29C  2   -0.238817    0.000451    1.246941    11.00000   -1.20000 
AFIX   0 
C30   1   -0.449088    0.111478    1.483482    11.00000    0.05810    0.07413 = 
         0.07629   -0.00526    0.02458    0.01653 
AFIX 137 
H30A  2   -0.506774    0.064031    1.468050    11.00000   -1.20000 
H30B  2   -0.448096    0.164533    1.445604    11.00000   -1.20000 
H30C  2   -0.467422    0.136852    1.535458    11.00000   -1.20000 
AFIX   0 
C31   1   -0.226789    0.225163    1.482869    11.00000    0.12486    0.07067 = 
         0.11460   -0.04021    0.02872   -0.03354 
AFIX 137 
H31A  2   -0.299003    0.260416    1.486219    11.00000   -1.20000 
H31B  2   -0.204824    0.218115    1.427893    11.00000   -1.20000 
H31C  2   -0.167501    0.260957    1.510912    11.00000   -1.20000 
AFIX   0 
HKLF 4 
  
REM  P20150416b1 
REM R1 =  0.0424 for    5178 Fo > 4sig(Fo)  and  0.0501 for all    5917 data 
REM    325 parameters refined using      0 restraints 
  
END 
  
WGHT      0.0822      0.0000 
  
REM Instructions for potential hydrogen bonds 
EQIV $1 -x, y-1/2, -z+5/2 
HTAB O4 O3_$1 
EQIV $2 -x, y+1/2, -z+5/2 
HTAB C3 O4_$2 
  
REM Highest difference peak  0.358,  deepest hole -0.280,  1-sigma level  0.041 
Q1    1   0.6968  0.3571  1.0582  11.00000  0.05    0.36 
Q2    1  -0.0094  0.0341  1.3658  11.00000  0.05    0.24 
Q3    1   0.0885  0.0555  1.2803  11.00000  0.05    0.23 
Q4    1   0.2999  0.1151  1.2666  11.00000  0.05    0.23 
Q5    1   0.0253  0.0390  1.2240  11.00000  0.05    0.22 
; 
_shelx_res_checksum   14364 
  
_shelx_hkl_file 
; 
   0   0  -6  254.61   11.01 
   0   0  -7    2.75    3.06 
   0   0  -8 1231.70   25.29 
   0   0  -9    0.54    2.07 
   0   0 -10   31.78    3.73 
   0   0 -11   -0.10    3.73 
   0   0 -12  954.61   16.09 
   0   0 -12  905.98   31.32 
   0   0 -12  901.56   31.01 
   0   0  12  907.65   30.93 
   0   0  12  878.97   30.33 
   0   0 -13   -0.47    2.43 
   0   0 -13    0.11    1.28 
   0   0 -13    0.92    2.03 
   0   0  13    1.16    1.41 
   0   0  13   -0.15    1.57 
   0   0 -14  217.23    9.19 
   0   0 -14  182.44    6.56 
   0   0 -14  187.31    6.62 
   0   0  14  186.92    6.26 
   0   0 -15   -2.49    2.08 
   0   0 -15   -2.65    2.03 
   0   0  15    0.21    1.75 
   0   0 -16   41.09    2.94 
   0   0 -16   39.15    2.82 
   0   0  16   31.76    2.42 
   0   0 -17   -2.64    1.96 
   0   0 -17   -1.30    2.16 
   0   0  17    2.44    2.00 
   0   0 -18   44.73    3.00 
   0   0 -18   46.01    3.00 
   0   0  18   49.36    2.95 
   0   0 -19    0.80    1.90 
   0   0 -19   -0.89    2.19 
   0   0  19    0.36    1.85 
   0   0 -20    3.86    2.51 
   0   0  21   -0.37    1.39 
   0   0 -21   -0.34    2.53 
   0   0 -21   -0.57    2.18 
   0  -1   0    0.07    1.48 
   0   1   0    0.08    1.43 
   0   1   0    0.49    1.59 
   0  -1   1 3777.12   64.00 
   0  -1  -1 3728.43   62.44 
   0  -1   2 1606.26   31.19 
   0  -1  -4  434.79   16.55 
   0  -1  -5 1117.82   24.16 
   0  -1  -6  655.32   23.23 
   0  -1  -7  382.25   14.84 
   0  -1  -8 1008.30   21.94 
   0  -1  -9  117.17    5.58 
   0  -1 -10    0.44    2.88 
   0  -1 -11    0.04    1.99 
   0  -1 -12   43.22    4.58 
   0  -1  12   38.61    2.08 
   0  -1 -12   38.64    2.64 
   0   1 -12   32.50    2.29 
   0  -1 -12   36.17    2.49 
   0   1  12   34.04    2.13 
   0  -1  12   36.25    2.25 
   0   1  12   35.18    2.13 
   0  -1 -13   49.47    4.08 
   0  -1  13   60.16    2.68 
   0  -1 -13   54.65    2.77 
   0   1 -13   55.43    2.87 
   0  -1 -13   59.84    3.31 
   0   1  13   61.17    2.96 
   0  -1  13   62.28    2.95 
   0   1  13   59.99    2.98 
   0   1 -14  197.51    9.24 
   0  -1 -14  175.67    8.47 
   0  -1  14  176.45    5.45 
   0  -1 -14  187.66    6.71 
   0   1 -14  193.88    6.71 
   0  -1 -14  184.13    6.32 
   0   1  14  191.32    6.05 
   0   1  14  186.12    5.93 
   0  -1  15  107.06    4.04 
   0  -1 -15  106.82    5.00 
   0   1 -15  108.80    4.70 
   0  -1 -15  107.91    4.78 
   0   1  15  110.07    4.92 
   0  -1  16    7.49    1.43 
   0   1 -16    5.47    2.06 
   0  -1 -16    4.72    2.17 
   0   1 -16    6.01    1.66 
   0  -1 -16    7.72    1.55 
   0   1  16    6.81    1.76 
   0   1 -17    7.24    2.20 
   0  -1 -17    3.10    2.11 
   0   1 -17    2.77    2.03 
   0  -1 -17   10.21    2.08 
   0   1  17    6.16    1.91 
   0   1 -18   -3.48    2.28 
   0  -1 -18    1.78    2.06 
   0   1 -18   -1.51    2.08 
   0  -1 -18    6.36    1.90 
   0   1  18    0.70    1.37 
   0   1 -19   10.05    2.07 
   0  -1 -19   11.18    1.95 
   0   1 -19    7.36    2.27 
   0  -1 -19    7.92    2.09 
   0   1  19    8.16    1.56 
   0  -1 -20    1.03    2.39 
   0  -1  20    0.67    1.58 
   0   1 -20   -1.23    2.27 
   0  -1 -20    0.07    2.12 
   0   1  20   -0.63    1.75 
   0   1 -20   -1.43    2.71 
   0  -1  21   -0.59    1.49 
   0   1  21    0.50    1.83 
   0  -1 -21   -1.14    2.10 
   0   1 -21   -0.84    2.18 
   0  -1 -21   -2.22    2.95 
   0  -2   0 1050.49   21.83 
   0   2  -1 3714.59   62.50 
   0  -2   1 3724.31   63.51 
   0   2   1 3540.98   60.19 
   0   2  -2 1622.94   31.06 
   0  -2  -2 1517.43   28.84 
   0   2   2 1588.57   30.87 
   0   2  -3  480.26   17.88 
   0  -2  -3  421.27   15.77 
   0  -2  -3  407.08   16.07 
   0   2  -4  711.33   25.03 
   0  -2  -4  811.37   18.51 
   0   2  -5 3215.34   55.19 
   0  -2  -5 3254.25   57.58 
   0   2  -6 2389.49   42.77 
   0  -2  -6 2214.77   41.49 
   0   2  -7  214.07    6.90 
   0  -2  -7  204.49    7.86 
   0   2  -8   30.72    3.35 
   0  -2  -8   28.68    3.24 
   0   2  -9  281.44   11.22 
   0  -2  -9  321.75   12.30 
   0   2 -10   27.18    3.56 
   0  -2 -10   25.42    3.08 
   0   2 -11  128.69    7.52 
   0  -2 -11  151.55    7.77 
   0   2 -11  132.96    5.68 
   0  -2 -11  126.35    5.32 
   0  -2  11  136.76    5.58 
   0   2  11  120.65    5.31 
   0  -2  11  132.22    5.60 
   0  -2 -12   65.01    5.40 
   0  -2  12   76.16    3.32 
   0   2 -12   78.38    4.02 
   0  -2 -12   82.63    4.16 
   0  -2 -12   72.13    3.38 
   0   2 -12   80.78    4.04 
   0  -2  12   80.33    3.70 
   0   2  12   72.73    3.33 
   0  -2  12   67.50    3.42 
   0   2  12   72.18    3.36 
   0  -2 -13   34.90    4.35 
   0  -2  13   30.20    1.72 
   0  -2 -13   25.90    2.32 
   0   2 -13   32.72    2.15 
   0  -2 -13   29.72    2.26 
   0  -2  13   27.23    2.09 
   0   2  13   28.64    2.06 
   0   2  13   25.54    1.53 
   0  -2 -14   96.97    6.49 
   0  -2  14  111.09    3.87 
   0  -2 -14  110.06    5.04 
   0   2 -14  108.90    4.50 
   0  -2 -14  113.56    4.45 
   0   2  14  111.28    4.56 
   0   2  14   99.66    3.65 
   0  -2  15   42.21    2.25 
   0  -2 -15   48.16    3.11 
   0   2 -15   48.25    2.76 
   0  -2 -15   42.22    2.51 
   0   2  15   50.10    2.95 
   0  -2  16   26.62    1.79 
   0  -2 -16   25.48    2.47 
   0   2 -16   26.89    2.43 
   0  -2 -16   21.62    2.37 
   0   2  16   26.48    2.25 
   0  -2  17    4.04    1.28 
   0  -2 -17    2.62    1.45 
   0   2 -17    2.71    2.54 
   0  -2 -17   -2.79    1.96 
   0   2  17    4.27    1.76 
   0  -2  18    6.75    1.43 
   0  -2 -18    7.82    1.84 
   0   2 -18    7.82    2.46 
   0  -2 -18   10.01    2.18 
   0   2  18    8.18    2.00 
   0  -2 -19   -0.72    1.62 
   0   2 -19    0.29    2.22 
   0  -2 -19   -0.21    1.99 
   0   2  19   -0.32    2.00 
   0  -2 -20    3.13    2.22 
   0  -2 -20    4.64    2.03 
   0   2  20    1.95    1.86 
   0   2  21    5.94    1.75 
   0  -2 -21    8.07    2.19 
   0  -2 -21    6.52    2.43 
   0  -3   0   -2.91    2.72 
   0   3   0   -1.55    2.54 
   0  -3  -1  277.87   11.01 
   0  -3   1  271.60   10.92 
   0   3   1  261.78   10.84 
   0  -3  -1  281.26   12.44 
   0   3  -1  300.66   12.70 
   0  -3  -2  901.36   19.37 
   0  -3  -2  939.33   22.58 
   0   3  -3 1251.88   25.01 
   0  -3  -3 1310.97   26.18 
   0   3  -4  137.71    6.38 
   0  -3  -4  132.97    6.86 
   0   3  -5  729.54   26.66 
   0  -3  -5  717.66   25.88 
   0   3  -6 1168.28   24.54 
   0  -3  -6 1199.45   25.23 
   0   3  -7  199.20    7.82 
   0  -3  -7  206.76    7.48 
   0   3  -8  254.05   11.10 
   0  -3  -8  262.94   10.60 
   0   3  -9   84.86    6.31 
   0  -3  -9   95.52    7.00 
   0   3 -10    2.11    2.32 
   0  -3 -10    0.13    3.52 
   0   3 -11   12.79    3.51 
   0  -3 -11    8.07    3.62 
   0  -3  11    9.06    1.18 
   0   3 -11    9.50    1.85 
   0  -3 -11    5.04    1.82 
   0  -3 -11    6.59    1.33 
   0  -3 -11    6.70    1.75 
   0  -3  11    7.34    1.83 
   0   3  11   10.13    1.69 
   0   3 -12    6.80    3.52 
   0  -3 -12   -0.95    3.24 
   0  -3  12    3.55    1.09 
   0   3 -12    1.63    1.87 
   0  -3 -12    4.27    1.71 
   0  -3 -12    2.26    1.35 
   0  -3 -12    0.67    1.80 
   0  -3  12    0.94    1.82 
   0   3  12    3.93    1.08 
   0   3 -13    1.59    3.59 
   0  -3 -13    1.15    3.14 
   0  -3  13    1.28    1.20 
   0   3 -13    2.07    2.17 
   0  -3 -13    2.34    1.23 
   0  -3 -13    3.00    1.59 
   0   3 -13   -0.21    2.05 
   0  -3 -13    2.56    1.73 
   0  -3  13    0.38    1.87 
   0   3  13    1.66    1.38 
   0   3 -14   22.77    4.62 
   0  -3 -14   18.62    3.46 
   0  -3  14   21.67    1.48 
   0   3 -14   23.03    2.43 
   0  -3 -14   19.74    1.92 
   0   3 -14   18.11    2.20 
   0  -3  14   17.79    2.09 
   0   3  14   22.65    1.87 
   0  -3  15   -1.27    1.26 
   0   3 -15   -1.15    1.95 
   0  -3 -15    1.34    1.88 
   0   3 -15    0.96    1.75 
   0  -3  15   -3.02    1.86 
   0   3  15   -5.02    1.70 
   0  -3  16   47.71    2.41 
   0   3 -16   40.38    2.87 
   0  -3 -16   48.09    3.07 
   0   3 -16   41.17    2.92 
   0  -3  16   42.61    3.17 
   0   3  16   50.63    2.96 
   0  -3  17   29.86    1.98 
   0   3 -17   28.32    2.75 
   0  -3 -17   34.71    3.35 
   0   3 -17   29.83    3.06 
   0  -3  17   26.29    2.47 
   0   3  17   31.46    2.72 
   0  -3  18    1.52    1.27 
   0  -3 -18    2.16    2.11 
   0  -3  18    2.15    1.61 
   0  -3 -18    3.31    2.27 
   0   3  18    5.03    1.97 
   0   3 -18    6.72    2.29 
   0  -3 -19    0.47    2.01 
   0  -3  19    3.89    1.56 
   0  -3 -19   -0.94    2.25 
   0   3  19    0.65    1.87 
   0   3 -19    2.05    2.25 
   0  -3 -20    0.08    2.11 
   0  -3  20   -1.86    1.44 
   0  -3 -20   -0.07    2.08 
   0   3  20    0.21    1.96 
   0   3 -20    1.06    2.60 
   0  -3  21    9.29    1.95 
   0   3  21    7.35    2.13 
   0  -3 -21    5.51    2.40 
   0   3 -21   10.63    2.47 
   0  -3 -21    5.09    3.14 
   0  -4   0 1731.84   33.15 
   0   4   0 1691.94   35.12 
   0  -4  -1   45.56    4.41 
   0  -4   1   53.74    4.81 
   0   4   1   46.31    4.45 
   0   4  -1   48.12    5.01 
   0  -4  -1   51.43    5.11 
   0   4  -2   41.62   15.40 
   0  -4  -2   41.90    3.76 
   0   4   2   44.44    3.61 
   0  -4  -2   44.24    3.95 
   0   4  -2   44.65   14.85 
   0   4  -3  296.57   12.02 
   0  -4  -3  279.30   11.66 
   0   4   3  285.21   11.58 
   0  -4  -3  248.28   11.09 
   0   4  -4   70.80    4.54 
   0  -4  -4   75.00    4.44 
   0   4  -5  221.06    9.76 
   0  -4  -5  197.08    7.86 
   0   4  -6  700.49   24.64 
   0  -4  -6  704.68   24.93 
   0   4  -7  128.84    6.24 
   0  -4  -7  121.40    5.73 
   0   4  -8   10.79    3.21 
   0  -4  -8   11.93    3.07 
   0   4  -9    1.84    3.29 
   0  -4  -9    2.72    2.81 
   0   4 -10   -1.99    3.30 
   0  -4 -10    3.19    2.92 
   0   4 -11  167.39    9.49 
   0  -4 -11  158.27    8.47 
   0  -4  11  170.38    6.56 
   0   4 -11  142.23    6.31 
   0  -4 -11  161.39    6.41 
   0  -4  11  153.92    5.92 
   0  -4 -11  167.45    6.55 
   0  -4 -11  162.60    6.56 
   0  -4  11  163.98    6.45 
   0   4  11  160.72    6.28 
   0   4 -12    0.47    2.26 
   0  -4 -12    2.37    3.68 
   0  -4  12    0.21    1.22 
   0   4 -12   -1.05    1.81 
   0  -4 -12    0.48    1.56 
   0  -4  12    1.41    1.28 
   0  -4 -12    1.39    1.45 
   0  -4 -12    1.34    1.43 
   0  -4  12   -0.88    1.68 
   0   4  12   -0.48    1.53 
   0   4 -13   45.55    4.48 
   0  -4 -13   46.54    4.24 
   0  -4  13   49.19    1.93 
   0   4 -13   45.40    2.59 
   0  -4 -13   53.65    3.03 
   0  -4 -13   56.20    2.47 
   0  -4 -13   47.90    2.21 
   0  -4  13   49.13    2.18 
   0   4  13   50.72    2.69 
   0   4 -14   28.61    4.30 
   0  -4 -14   23.76    3.40 
   0  -4  14   28.54    1.72 
   0   4 -14   25.03    2.32 
   0  -4 -14   29.19    2.27 
   0  -4 -14   25.58    1.85 
   0  -4 -14   21.30    2.36 
   0  -4  14   30.71    1.90 
   0   4  14   34.40    2.29 
   0  -4  15    4.31    1.48 
   0   4 -15    8.10    2.05 
   0  -4 -15    4.50    1.97 
   0  -4 -15    1.41    2.11 
   0  -4  15    8.19    1.82 
   0   4  15    9.05    1.95 
   0  -4 -15    5.24    2.50 
   0  -4  16    7.39    1.26 
   0   4 -16   10.11    1.67 
   0  -4 -16   13.41    2.18 
   0  -4 -16    1.52    2.05 
   0  -4  16    5.06    1.75 
   0   4  16    9.07    2.11 
   0  -4  17    0.66    1.27 
   0  -4 -17    1.82    1.99 
   0  -4  17   -0.42    1.61 
   0  -4 -17    2.83    1.95 
   0   4  17    4.32    1.92 
   0   4 -17    7.79    2.58 
   0  -4  18   19.04    1.49 
   0  -4 -18   17.07    2.74 
   0  -4  18   14.56    1.86 
   0   4  18   16.43    2.16 
   0   4 -18   22.66    2.87 
   0  -4  19    9.00    1.47 
   0  -4 -19   10.76    2.19 
   0  -4  19   10.35    1.81 
   0   4  19   13.74    2.03 
   0   4 -19    7.76    2.45 
   0  -4 -20    1.42    2.15 
   0  -4  20    0.24    1.64 
   0   4  20   -1.27    1.96 
   0   4 -20    4.23    2.14 
   0   4 -21   -0.52    2.61 
   0  -5   0   -1.43    3.72 
   0   5   0    0.38    2.49 
   0  -5  -1  902.72   19.76 
   0   5  -1  881.57   21.30 
   0  -5  -2  143.18    6.43 
   0  -5   2  133.89    6.42 
   0   5   2  130.01    6.74 
   0   5  -2  115.45    6.23 
   0  -5  -2  116.45    7.03 
   0   5  -3   28.53    3.66 
   0  -5  -3   39.23    3.52 
   0   5   3   34.91    3.28 
   0   5  -3   29.53    4.14 
   0   5  -4    4.02    2.98 
   0  -5  -4    0.49    2.53 
   0   5  -5  596.47   21.66 
   0  -5  -5  604.12   21.86 
   0   5  -6    2.18    3.37 
   0  -5  -6    2.33    2.68 
   0   5  -7   68.45    4.94 
   0  -5  -7   59.86    3.72 
   0   5  -8   97.58    7.20 
   0  -5  -8  112.10    7.67 
   0   5  -9  113.31    8.09 
   0  -5  -9  103.46    7.08 
   0   5 -10    6.42    3.89 
   0  -5 -10    0.81    2.42 
   0  -5  10    1.55    1.15 
   0   5 -10    1.81    1.85 
   0  -5 -10    1.34    1.35 
   0  -5  10    2.93    0.98 
   0  -5 -10    1.11    1.31 
   0  -5 -10    0.67    1.05 
   0  -5  10    1.91    1.10 
   0   5  10    3.12    1.42 
   0   5 -11   13.80    3.41 
   0  -5 -11    9.66    3.12 
   0  -5  11    8.22    1.21 
   0   5 -11    8.70    2.24 
   0  -5 -11    7.66    1.23 
   0  -5  11    8.70    1.34 
   0  -5 -11    5.44    1.10 
   0  -5 -11    6.53    1.85 
   0  -5  11    5.85    1.62 
   0   5  11   11.60    1.34 
   0   5 -12   51.34    5.05 
   0  -5 -12   55.44    5.07 
   0  -5  12   53.22    2.53 
   0   5 -12   48.95    2.99 
   0  -5 -12   47.81    2.69 
   0  -5  12   56.53    3.01 
   0  -5 -12   44.62    2.37 
   0  -5 -12   44.44    2.79 
   0  -5  12   55.04    2.95 
   0   5  12   49.90    2.70 
   0   5 -13   -1.93    3.75 
   0  -5 -13    0.69    3.10 
   0   5 -13   -1.08    5.33 
   0  -5  13    2.98    1.28 
   0   5 -13   -1.77    1.94 
   0  -5 -13    1.00    1.89 
   0  -5  13    1.40    1.01 
   0  -5 -13    0.20    1.17 
   0  -5 -13    0.66    1.63 
   0  -5  13    3.98    1.67 
   0   5  13    4.19    1.73 
   0  -5  14   20.29    1.54 
   0   5 -14   16.31    2.23 
   0  -5 -14   23.20    2.03 
   0  -5 -14   17.75    1.72 
   0  -5 -14   19.84    2.21 
   0  -5  14   20.80    1.97 
   0   5  14   21.93    1.68 
   0  -5  15    4.47    1.25 
   0  -5 -15    4.24    2.00 
   0  -5  15    2.74    1.81 
   0  -5 -15    3.24    2.11 
   0   5  15    6.60    1.85 
   0   5 -15    8.56    2.23 
   0  -5 -15    3.32    2.27 
   0  -5  16   28.82    1.96 
   0  -5 -16   30.81    2.71 
   0  -5  16   34.16    2.58 
   0  -5 -16   28.70    2.63 
   0   5  16   29.06    2.58 
   0   5 -16   23.13    3.09 
   0  -5 -16   26.95    3.04 
   0  -5  17    8.26    1.41 
   0  -5 -17   11.47    2.19 
   0  -5  17    8.03    1.68 
   0  -5 -17   12.59    1.72 
   0   5  17   13.08    2.19 
   0   5 -17   12.96    2.82 
   0  -5  18    5.46    1.41 
   0  -5 -18    6.77    2.10 
   0  -5  18    4.81    1.81 
   0  -5 -18    5.79    2.25 
   0   5  18    4.42    1.66 
   0   5 -18    2.07    2.19 
   0  -5  19    2.85    1.25 
   0  -5 -19    4.57    1.97 
   0  -5  19    3.23    1.96 
   0  -5 -19    2.42    2.18 
   0   5  19    0.70    2.17 
   0   5 -19    2.29    2.35 
   0  -5 -20    5.28    2.48 
   0  -5  20    5.70    1.56 
   0  -5 -20    4.12    2.02 
   0   5  20    2.24    2.40 
   0   5 -20    1.42    2.23 
   0  -6   0  191.62    8.30 
   0   6   0  201.96    9.00 
   0  -6  -1  504.93   18.81 
   0  -6   1  488.92   18.50 
   0   6   1  476.17   18.19 
   0   6  -1  478.60   18.91 
   0  -6  -2  184.32    7.10 
   0  -6   2  150.17    6.45 
   0   6   2  165.05    7.22 
   0   6  -2  186.06    8.13 
   0  -6  -3 1028.69   22.44 
   0  -6   3 1113.62   24.32 
   0   6   3 1067.04   23.95 
   0   6  -3 1111.52   24.78 
   0   6  -4  208.51    8.94 
   0   6  -5   39.99    4.14 
   0  -6  -5   33.52    3.10 
   0   6  -5   42.07    4.78 
   0   6  -6   53.40    3.92 
   0  -6  -6   51.99    3.99 
   0   6  -6   50.62    5.18 
   0   6  -7   53.79    4.59 
   0  -6  -7   38.69    3.73 
   0   6  -7   48.01    5.09 
   0   6  -8    2.70    2.31 
   0  -6  -8    2.94    1.95 
   0   6  -9   40.55    3.62 
   0  -6  -9   38.85    3.83 
   0  -6   9   36.56    1.90 
   0  -6   9   39.16    1.93 
   0  -6  -9   36.52    2.39 
   0   6  -9   38.56    2.70 
   0   6 -10   12.46    3.59 
   0  -6 -10   18.08    3.23 
   0   6 -10    8.93    4.20 
   0  -6  10   10.36    1.49 
   0  -6 -10   13.23    1.70 
   0  -6  10   16.01    1.60 
   0  -6  10   15.18    1.43 
   0  -6 -10   14.89    1.38 
   0  -6 -10   12.56    1.89 
   0   6  10   13.43    1.36 
   0   6 -10   14.95    2.30 
   0   6 -11    6.81    3.55 
   0  -6 -11    6.84    3.34 
   0   6 -11    2.84    4.33 
   0  -6  11    2.73    1.33 
   0  -6 -11    2.83    1.36 
   0  -6  11    3.79    1.12 
   0  -6  11    2.14    1.24 
   0  -6 -11    4.65    1.61 
   0  -6 -11    2.34    1.75 
   0   6  11    3.50    1.12 
   0   6 -11    3.38    1.76 
   0   6 -12   26.33    4.17 
   0  -6 -12   35.20    4.45 
   0   6 -12   30.04    4.46 
   0  -6  12   37.14    2.11 
   0  -6 -12   33.05    2.43 
   0  -6  12   42.77    2.60 
   0  -6  12   38.81    2.29 
   0  -6 -12   34.67    2.32 
   0  -6 -12   35.54    2.48 
   0   6  12   35.78    2.40 
   0   6 -12   29.59    3.02 
   0   6 -13   -2.91    3.62 
   0  -6 -13    2.29    4.09 
   0  -6  13    4.04    0.99 
   0  -6 -13    5.36    1.62 
   0  -6  13    2.74    1.40 
   0  -6  13    4.60    1.66 
   0  -6 -13    3.05    1.14 
   0  -6 -13    5.08    1.41 
   0   6  13    3.49    1.63 
   0   6 -13    6.73    2.01 
   0  -6  14   10.05    1.55 
   0  -6 -14    8.24    2.02 
   0  -6  14   11.57    1.84 
   0  -6 -14    8.62    1.45 
   0  -6 -14    9.35    1.55 
   0   6  14    7.07    1.97 
   0   6 -14   10.62    2.61 
   0  -6  15    3.64    0.98 
   0  -6 -15    2.50    2.15 
   0  -6  15    2.23    1.70 
   0  -6 -15    3.45    1.64 
   0  -6 -15    6.14    2.02 
   0   6  15    6.40    1.93 
   0   6 -15    0.47    2.84 
   0  -6 -15    2.44    2.09 
   0  -6  16   70.31    2.93 
   0  -6 -16   63.11    3.52 
   0  -6 -16   61.10    3.19 
   0   6  16   65.51    3.30 
   0   6 -16   65.04    3.71 
   0  -6 -16   69.06    4.32 
   0  -6  17   13.67    1.45 
   0  -6 -17   11.40    2.18 
   0  -6  17    9.85    1.80 
   0  -6 -17    9.03    2.12 
   0   6  17   12.74    1.76 
   0   6 -17    9.93    2.09 
   0  -6 -17    7.56    2.57 
   0  -6  18    1.38    1.22 
   0  -6 -18   -0.34    2.19 
   0  -6  18    1.43    1.55 
   0  -6 -18    0.64    2.31 
   0   6  18   -0.43    2.03 
   0   6 -18   -2.62    2.60 
   0  -6  19    1.99    1.42 
   0  -6 -19    0.69    2.15 
   0  -6  19    4.17    1.56 
   0  -6 -19    3.96    2.00 
   0   6  19    1.17    2.13 
   0   6 -19    1.37    2.59 
   0  -6  20    4.80    1.95 
   0  -6 -20    1.97    2.21 
   0   6 -20    3.31    2.46 
   0  -7   0   -0.48    1.65 
   0   7   0   -0.38    2.37 
   0  -7  -1  226.15    9.60 
   0  -7   1  198.74    8.18 
   0   7   1  202.42    8.51 
   0   7  -1  205.78    8.61 
   0  -7  -2  119.95    5.85 
   0  -7   2  119.24    5.28 
   0   7  -2  132.37    6.73 
   0  -7  -3  130.33    6.06 
   0  -7   3  128.88    6.14 
   0   7  -3  138.31    6.56 
   0  -7  -4    0.91    2.32 
   0  -7   4    1.01    3.05 
   0   7  -4    2.08    3.61 
   0  -7  -5   85.90    6.35 
   0  -7   5  106.47    7.60 
   0   7  -5   86.72    7.23 
   0   7  -6   24.46    2.90 
   0  -7  -6   24.61    3.49 
   0   7  -6   18.56    3.83 
   0   7  -7   68.02    5.86 
   0  -7  -7   50.62    4.18 
   0   7  -7   66.46    5.76 
   0   7  -8   17.14    3.00 
   0  -7  -8   18.56    3.52 
   0   7  -8   18.57    3.79 
   0  -7   8   14.66    1.40 
   0  -7   8   16.19    1.86 
   0  -7   8   19.59    1.40 
   0  -7  -8   15.53    1.81 
   0   7  -8   18.87    2.52 
   0   7  -9   -0.92    3.53 
   0  -7  -9    0.08    1.99 
   0   7  -9    6.53    4.10 
   0  -7   9    0.56    0.95 
   0  -7  -9    0.39    1.09 
   0  -7   9    0.68    1.45 
   0  -7   9    0.57    1.34 
   0  -7  -9   -1.40    1.55 
   0   7   9    1.87    1.43 
   0   7  -9    2.66    2.43 
   0   7 -10   34.75    4.19 
   0  -7 -10   35.65    4.15 
   0   7 -10   32.73    4.10 
   0  -7 -10   35.66    2.22 
   0  -7  10   38.51    2.45 
   0  -7  10   39.59    2.42 
   0  -7 -10   41.10    2.19 
   0  -7 -10   39.74    2.77 
   0   7  10   39.85    2.53 
   0   7 -10   40.95    2.76 
   0   7 -11   35.51    4.98 
   0  -7 -11   31.47    4.13 
   0   7 -11   39.51    5.02 
   0  -7 -11   38.08    2.56 
   0  -7  11   44.12    2.68 
   0  -7  11   39.07    2.28 
   0  -7 -11   41.09    2.68 
   0  -7 -11   40.21    2.82 
   0   7  11   34.28    2.50 
   0   7 -11   41.39    3.16 
   0   7 -12   31.89    4.79 
   0   7 -12   46.45    5.14 
   0  -7  12   44.25    2.20 
   0  -7 -12   37.73    2.59 
   0  -7  12   45.13    2.56 
   0  -7  12   41.50    2.36 
   0  -7 -12   40.06    2.20 
   0  -7 -12   41.92    2.49 
   0   7  12   43.50    2.78 
   0   7 -12   39.19    3.24 
   0  -7  13   10.84    1.42 
   0  -7 -13   10.50    1.79 
   0  -7  13   11.44    1.81 
   0  -7  13    7.47    1.48 
   0  -7 -13   12.60    1.54 
   0  -7 -13   11.01    1.95 
   0   7  13   13.37    1.95 
   0   7 -13   10.99    2.41 
   0  -7  14   -0.81    1.49 
   0  -7 -14   -4.21    2.17 
   0  -7  14   -1.26    1.59 
   0  -7 -14    1.42    1.15 
   0  -7 -14    0.83    1.92 
   0   7  14    0.50    1.75 
   0   7 -14   -0.50    2.55 
   0  -7  15   -0.78    1.29 
   0  -7 -15   -0.65    1.82 
   0  -7  15    1.54    1.49 
   0  -7 -15   -0.70    1.59 
   0  -7 -15    0.73    2.31 
   0   7  15    1.80    1.65 
   0   7 -15   -0.96    2.32 
   0  -7 -15    5.09    2.65 
   0  -7  16    0.94    1.35 
   0  -7 -16    1.09    1.97 
   0  -7  16    0.73    1.18 
   0  -7 -16    1.58    2.17 
   0   7  16    0.79    1.71 
   0   7 -16   -2.21    2.53 
   0  -7 -16   -3.09    2.35 
   0  -7  17   30.89    1.60 
   0  -7 -17   27.78    2.58 
   0  -7  17   31.30    2.03 
   0  -7 -17   24.38    2.51 
   0   7  17   31.26    2.29 
   0   7 -17   37.07    2.99 
   0  -7 -17   30.93    2.87 
   0  -7  18    2.15    1.28 
   0  -7 -18    1.82    2.10 
   0  -7  18    1.23    1.54 
   0  -7 -18    1.71    2.14 
   0   7  18    2.27    2.04 
   0   7 -18    1.78    2.05 
   0  -7  19    7.44    1.57 
   0  -7  19    7.78    1.86 
   0  -7 -19   10.24    2.45 
   0   7 -19    7.92    2.34 
   0  -8   0  946.97   28.34 
   0  -8  -1   37.68    3.77 
   0  -8   1   31.87    3.49 
   0  -8  -2  141.89    7.15 
   0  -8   2  146.65    7.69 
   0   8  -2  136.38    7.67 
   0  -8  -3    5.14    2.89 
   0  -8   3    8.85    3.07 
   0   8  -3    8.26    2.83 
   0  -8  -4   45.49    4.14 
   0  -8   4   48.47    3.81 
   0   8  -4   44.49    4.48 
   0  -8  -5    2.51    2.73 
   0  -8   5    3.19    2.84 
   0   8  -5    1.84    3.16 
   0  -8  -6   69.10    5.51 
   0  -8   6   65.15    5.33 
   0   8  -6   68.73    5.99 
   0  -8   6   55.11    2.34 
   0  -8   6   65.57    3.91 
   0  -8  -6   64.46    4.08 
   0  -8  -7  200.95    9.49 
   0  -8   7  195.86    9.50 
   0   8  -7  194.92   10.12 
   0  -8   7  184.85    7.07 
   0  -8   7  193.91    7.60 
   0  -8   7  206.81    7.73 
   0  -8  -7  190.86    7.53 
   0   8  -7  192.34    8.09 
   0  -8  -8   46.75    4.71 
   0  -8   8   53.94    5.09 
   0   8  -8   48.72    5.44 
   0  -8   8   46.19    2.15 
   0  -8   8   52.80    2.69 
   0  -8  -8   53.21    2.77 
   0   8  -8   57.13    3.40 
   0  -8  -9    7.21    3.14 
   0  -8   9    8.89    3.71 
   0   8  -9    3.66    3.09 
   0  -8   9    6.39    1.27 
   0  -8   9    3.57    1.40 
   0  -8   9    3.74    1.00 
   0  -8  -9    5.28    1.83 
   0   8   9    2.12    1.62 
   0   8  -9    2.53    2.13 
   0  -8  10    3.51    2.65 
   0   8 -10    6.01    3.88 
   0  -8  10    5.24    1.10 
   0  -8 -10    5.12    1.81 
   0  -8  10    5.14    1.34 
   0  -8  10    3.49    1.25 
   0  -8 -10    4.17    1.40 
   0   8  10    3.92    1.65 
   0   8 -10    4.90    1.76 
   0   8 -11    6.42    5.20 
   0  -8 -11    3.28    1.55 
   0  -8  11    8.47    1.55 
   0  -8  11    5.81    1.20 
   0  -8 -11    8.89    1.62 
   0  -8 -11    7.71    1.88 
   0   8  11    4.89    1.70 
   0   8 -11    5.93    1.53 
   0  -8 -12    3.89    1.81 
   0  -8  12    4.84    1.64 
   0  -8  12    3.96    1.54 
   0  -8 -12    6.92    1.53 
   0  -8 -12    3.80    1.99 
   0   8  12    6.51    1.92 
   0   8 -12    2.92    2.35 
   0  -8  13    2.03    1.21 
   0  -8 -13   -1.34    1.84 
   0  -8  13    0.46    1.08 
   0  -8 -13    0.17    1.43 
   0  -8 -13   -0.77    1.87 
   0   8  13    1.03    1.80 
   0   8 -13   -0.84    1.69 
   0  -8  14   66.03    3.31 
   0  -8 -14   64.12    4.01 
   0  -8  14   62.18    3.50 
   0  -8 -14   61.41    3.40 
   0  -8 -14   56.72    3.25 
   0   8  14   57.25    3.27 
   0   8 -14   53.40    3.87 
   0  -8  15    1.02    1.42 
   0  -8 -15    0.58    2.08 
   0  -8  15    3.70    1.61 
   0  -8 -15    0.30    1.22 
   0  -8 -15    0.39    2.02 
   0   8  15    0.11    1.88 
   0   8 -15   -1.16    2.69 
   0  -8 -15   -1.96    2.20 
   0  -8  16    9.44    1.30 
   0  -8 -16    5.93    2.14 
   0  -8  16    8.67    1.62 
   0  -8 -16    8.26    2.03 
   0   8  16    9.89    2.32 
   0   8 -16    5.56    2.18 
   0  -8 -16    8.06    2.33 
   0  -8  17   22.02    1.64 
   0  -8  17   23.81    1.86 
   0  -8 -17   23.69    2.31 
   0   8 -17   22.92    2.99 
   0  -8 -17   22.36    2.72 
   0  -8  18   15.93    1.59 
   0  -8  18   13.72    1.89 
   0  -8 -18   14.19    2.65 
   0   8 -18   12.20    2.75 
   0  -8 -18   14.40    2.92 
   0  -8  19    2.90    1.55 
   0  -9   0   -0.01    2.56 
   0  -9  -1  116.63    6.82 
   0  -9   1  124.37    7.22 
   0  -9  -2   41.02    3.78 
   0  -9   2   43.48    3.81 
   0  -9  -2   36.42    2.25 
   0  -9  -3   53.98    4.26 
   0  -9   3   54.65    4.52 
   0  -9  -3   42.81    2.41 
   0  -9  -4   18.07    2.95 
   0  -9   4   19.50    3.57 
   0  -9   4   17.46    1.58 
   0  -9   4   21.26    1.58 
   0  -9  -4   15.76    1.83 
   0  -9  -5    5.47    2.61 
   0  -9   5    7.92    2.65 
   0  -9   5    4.41    0.92 
   0  -9   5    3.94    1.10 
   0  -9  -5    4.94    1.71 
   0  -9  -6   10.05    3.09 
   0  -9   6   12.15    3.16 
   0   9  -6    8.10    3.52 
   0  -9   6    9.89    1.28 
   0  -9   6   11.06    1.38 
   0  -9  -6   10.06    1.77 
   0   9  -6    8.29    2.09 
   0  -9   7   63.96    5.06 
   0   9  -7   68.01    6.18 
   0  -9   7   70.20    3.13 
   0  -9   7   70.18    3.08 
   0  -9   7   72.02    3.04 
   0  -9  -7   74.66    3.31 
   0   9  -7   73.58    3.69 
   0  -9   8    5.93    3.70 
   0   9  -8   -1.35    4.17 
   0  -9   8    4.02    1.18 
   0  -9   8    2.09    1.37 
   0  -9   8    4.86    1.40 
   0  -9  -8    3.04    1.58 
   0   9  -8    5.20    2.10 
   0  -9   9    5.30    3.61 
   0   9  -9    2.26    3.34 
   0  -9   9    3.08    1.07 
   0  -9   9    2.44    1.52 
   0  -9  -9    4.41    1.47 
   0   9  -9    4.98    2.53 
   0  -9  10   12.64    4.71 
   0  -9  10   10.47    1.46 
   0  -9  10   10.06    1.74 
   0  -9  10    9.69    1.69 
   0  -9 -10   10.55    1.69 
   0   9 -10   12.66    2.69 
   0  -9  11   64.71    2.99 
   0  -9  11   64.96    3.23 
   0  -9 -11   62.46    3.10 
   0   9 -11   64.25    3.92 
   0  -9  12    1.83    1.26 
   0  -9  12   -3.16    1.56 
   0  -9 -12    0.70    1.21 
   0   9  12    1.63    1.72 
   0   9 -12    2.15    2.31 
   0  -9  13   16.26    1.89 
   0  -9 -13   17.00    1.90 
   0  -9 -13   18.83    2.41 
   0   9  13   14.11    1.99 
   0   9 -13   15.76    2.88 
   0  -9  14   43.87    2.77 
   0  -9 -14   47.85    2.58 
   0  -9 -14   40.69    3.07 
   0   9 -14   35.33    3.10 
   0  -9  15   98.73    2.66 
   0  -9  15   95.53    3.97 
   0  -9 -15   89.24    3.43 
   0  -9 -15   95.45    4.78 
   0   9 -15   98.68    3.78 
   0  -9 -15   98.76    3.91 
   0  -9  16    9.13    1.35 
   0  -9  16    8.39    1.87 
   0  -9 -16    6.97    2.49 
   0   9 -16    7.13    2.43 
   0  -9 -16    9.00    2.48 
   0  -9  17    0.79    1.18 
   0  -9  17    1.80    1.71 
   0   9 -17    0.96    2.20 
   0  -9 -17    0.49    2.21 
   0  -9  18    1.16    1.47 
   0 -10   0   28.68    2.28 
   0 -10  -1    2.20    1.86 
   0 -10   1    6.07    1.45 
   0 -10  -2   30.64    2.11 
   0 -10   2   32.00    2.46 
   0 -10   3  163.63    5.68 
   0 -10  -3  157.61    5.48 
   0 -10   4  127.68    4.84 
   0 -10  -4  127.93    4.88 
   0 -10   5  190.30    6.60 
   0 -10   5  202.39    7.19 
   0 -10  -5  203.49    7.28 
   0 -10   6   19.59    1.49 
   0 -10   6   22.96    1.79 
   0 -10  -6   20.88    2.24 
   0 -10   7  121.83    4.11 
   0 -10   7  128.25    4.54 
   0 -10   7  125.27    5.04 
   0 -10  -7  135.59    4.80 
   0  10  -7  126.22    5.11 
   0 -10   8   11.31    1.28 
   0 -10   8   15.00    1.78 
   0 -10   8   10.46    1.28 
   0 -10  -8   13.15    1.88 
   0  10  -8   14.12    2.14 
   0 -10   9    1.14    1.17 
   0 -10   9    0.02    1.38 
   0 -10  -9    2.68    1.52 
   0  10  -9    2.12    1.80 
   0 -10  10   41.96    2.28 
   0 -10  10   40.92    2.86 
   0 -10 -10   44.40    2.77 
   0  10 -10   37.06    2.85 
   0 -10  11    9.33    1.44 
   0 -10  11    8.77    1.67 
   0 -10 -11    8.16    1.38 
   0  10 -11    8.23    1.80 
   0 -10  12    5.64    1.20 
   0 -10  12    8.31    1.71 
   0 -10 -12    5.80    1.77 
   0  10 -12    2.34    2.26 
   0 -10  13  110.41    4.08 
   0 -10  13  105.50    4.43 
   0 -10 -13  105.03    4.27 
   0  10 -13   94.91    4.48 
   0 -10  14    6.42    1.90 
   0 -10 -14    7.58    1.56 
   0  10 -14    3.48    2.22 
   0 -10  15   -0.37    1.57 
   0  10 -15    0.44    2.62 
   0 -10 -15   -0.57    2.38 
   0 -10  16    3.21    1.37 
   0 -10  16    5.60    1.86 
   0  10 -16    3.31    2.61 
   0 -10 -16    7.02    2.72 
   0 -10  17   28.69    1.76 
   0 -10 -17   27.80    2.75 
   0 -11   0   -2.89    1.73 
   0 -11  -1  187.59    6.75 
   0 -11   1  187.98    6.98 
   0 -11  -2  199.74    6.39 
   0 -11   2  192.18    6.42 
   0 -11   3  263.28    7.87 
   0 -11  -3  289.67    8.89 
   0 -11   4    1.38    1.03 
   0 -11  -4    3.68    1.74 
   0 -11   5    1.61    0.97 
   0 -11  -5   -2.11    1.18 
   0 -11   6   47.22    2.26 
   0 -11  -6   47.47    2.92 
   0 -11   7   13.60    1.47 
   0 -11  -7   15.54    2.13 
   0 -11   8   40.87    2.52 
   0 -11  -8   38.77    2.59 
   0 -11   9    1.22    1.33 
   0 -11   9    2.27    1.65 
   0 -11  -9   -0.78    1.63 
   0  11  -9    3.25    1.97 
   0 -11  10    1.85    1.26 
   0 -11  10    3.35    1.56 
   0 -11 -10    4.08    1.55 
   0  11 -10    1.86    2.18 
   0 -11  11   42.42    2.47 
   0 -11  11   49.39    3.08 
   0 -11 -11   48.81    2.95 
   0  11 -11   43.46    3.50 
   0 -11  12   29.62    1.93 
   0 -11  12   24.87    2.18 
   0 -11 -12   26.19    2.07 
   0  11 -12   28.73    2.96 
   0 -11  13   -2.26    1.32 
   0 -11  13    1.09    1.92 
   0 -11 -13    0.99    1.57 
   0  11 -13    1.73    2.42 
   0 -11  14   20.50    1.61 
   0 -11  14   23.12    2.37 
   0 -11 -14   19.90    1.79 
   0  11 -14   17.69    2.55 
   0 -11 -14   15.09    2.67 
   0 -11 -15   28.22    2.52 
   0 -11 -16   -0.47    2.24 
   0 -11  17   17.00    3.17 
   0 -12   0   17.06    1.89 
   0 -12  -1   76.94    3.51 
   0 -12   1   69.17    3.31 
   0  12   1   72.49    3.74 
   0 -12  -2   93.94    4.17 
   0 -12   2   96.30    4.32 
   0 -12  -3   15.55    1.59 
   0 -12   3   15.06    2.22 
   0 -12  -4    3.73    1.93 
   0 -12   4   -1.52    2.15 
   0 -12   5   14.29    1.69 
   0 -12  -5   16.63    2.48 
   0 -12   5   14.14    2.23 
   0 -12   6   60.61    2.90 
   0 -12  -6   61.65    3.46 
   0 -12   7   11.86    1.48 
   0 -12  -7   13.61    2.01 
   0 -12   8   23.48    1.90 
   0 -12  -8   18.49    1.71 
   0 -12   9    1.87    1.25 
   0 -12  -9    1.26    1.66 
   0 -12  10   57.14    2.46 
   0 -12 -10   58.91    2.89 
   0 -12  11   59.01    2.79 
   0 -12 -11   60.84    3.24 
   0 -12  12    2.18    1.42 
   0 -12 -12   -0.19    1.39 
   0 -12  13   17.64    1.60 
   0 -12 -13   21.35    1.88 
   0 -12  14   -0.53    1.23 
   0 -12 -15   -1.49    2.48 
   0 -13   0    2.60    1.85 
   0  13   0    0.84    2.56 
   0 -13  -1   -0.40    1.79 
   0 -13   1    0.14    1.35 
   0 -13  -2  126.40    5.23 
   0 -13   2  121.93    5.29 
   0 -13  -3   20.60    2.06 
   0 -13   3   20.74    2.29 
   0 -13  -4    1.88    1.72 
   0 -13   4    4.13    1.44 
   0 -13  -5   45.71    2.76 
   0 -13   5   45.40    3.04 
   0 -13  -6   37.26    2.74 
   0 -13   6   42.32    3.11 
   0 -13  -7  131.63    4.98 
   0 -13   7  144.79    5.80 
   0 -13  -8   28.39    2.41 
   0 -13   8   42.29    2.96 
   0 -13  -9   -1.16    1.73 
   0 -13   9    4.01    2.15 
   0 -13 -10   33.91    2.23 
   0 -13  10   35.09    2.70 
   0 -13 -11   41.13    2.28 
   0 -13  11   47.12    2.84 
   0 -13 -12    7.31    1.64 
   0 -13 -12   11.60    2.62 
   0 -13 -13    3.79    1.97 
   0 -13 -13    2.31    2.06 
   0 -14   0    2.75    1.94 
   0 -14  -1   94.72    4.71 
   0 -14   1  103.03    5.12 
   0  14  -1  110.44    6.01 
   0 -14  -2   33.61    2.75 
   0 -14   2   29.65    2.64 
   0 -14  -3    4.08    1.87 
   0 -14   3    5.08    2.12 
   0 -14  -4   14.86    2.36 
   0 -14   4   12.12    1.81 
   0 -14  -5    3.81    1.88 
   0 -14   5    0.50    1.67 
   0 -14  -6   17.97    2.00 
   0 -14   6   15.39    2.26 
   0 -14  -7    3.28    1.66 
   0 -14   7   -0.51    1.47 
   0 -14  -8    8.46    1.63 
   0 -14   8    9.24    2.25 
   0 -14  -9    4.53    1.77 
   0 -14   9    6.90    2.06 
   0 -14 -10    4.52    1.81 
   0 -14  10    4.86    1.89 
   0 -14 -10    4.31    2.52 
   0 -14 -11   43.76    2.31 
   0 -14  11   49.70    2.59 
   0 -14 -11   45.20    3.18 
   0 -14  12   -0.65    1.82 
   0 -14 -12    2.74    2.22 
   0 -14  13    9.93    2.45 
   0 -14 -13    9.33    5.26 
   0 -15   0    0.04    2.19 
   0 -15  -1   58.19    3.04 
   0 -15   1   54.61    2.91 
   0 -15  -2    0.93    2.08 
   0 -15   2    6.11    1.80 
   0  15  -2    4.88    3.26 
   0 -15  -3   17.83    2.41 
   0 -15   3   14.96    4.32 
   0  15  -3   14.94    2.72 
   0 -15  -4   17.30    2.27 
   0 -15   4   18.57    2.42 
   0  15  -4   19.26    3.07 
   0 -15  -5   18.15    1.92 
   0 -15   5   17.75    2.40 
   0 -15  -6   -0.84    1.66 
   0 -15   6    1.77    2.10 
   0 -15  -7   16.25    2.18 
   0 -15   7   15.48    2.35 
   0 -15  -7   17.23    2.77 
   0 -15  -8    3.35    1.86 
   0 -15   8    2.54    2.26 
   0 -15  -8    1.63    2.78 
   0 -15  -9    1.68    1.84 
   0 -15   9    0.70    1.70 
   0 -15  -9    0.92    2.85 
   0 -15  10    9.34    1.94 
   0 -15 -10    9.73    3.02 
   0 -15  11    1.08    2.07 
   0  15 -11   -2.08    3.07 
   0 -16   0   42.09    4.08 
   0 -16  -1   53.98    2.91 
   0 -16   1   49.02    2.78 
   0 -16  -2    9.66    1.97 
   0 -16   2    6.24    2.18 
   0 -16  -3   -1.46    1.76 
   0 -16   3   -0.73    1.83 
   0 -16  -4   -0.21    1.93 
   0 -16   4   -1.25    2.19 
   0 -16  -5    1.17    1.80 
   0 -16   5   -1.42    1.92 
   0  16  -5    0.38    3.47 
   0 -16  -6    0.53    1.88 
   0 -16   6    0.92    1.96 
   0  16  -6    3.10    3.30 
   0 -16  -7    0.76    2.22 
   0 -16   7   -1.23    1.83 
   0  16  -7    0.74    3.13 
   0 -16   8    4.44    2.15 
   0 -16   9    8.14    2.43 
   0 -17   0   -0.01    1.99 
   0 -17  -1   13.58    2.31 
   0 -17   1   11.30    2.50 
   0 -17  -2   -0.21    1.98 
   0 -17   2   -0.55    2.12 
   0 -17  -3    1.32    2.22 
   0 -17   3    1.76    2.14 
   0 -17   4   29.00    2.46 
   0 -17   5    4.86    2.45 
   1   0   0    0.06    1.23 
  -1   0   0    0.47    1.28 
   1   0   0   -0.12    1.50 
  -1   0  -1  223.72   10.05 
   1   0   1  206.06    7.91 
   1   0  -1  202.98    8.32 
  -1   0   1  212.33    7.86 
  -1   0  -1  221.06   10.58 
   1   0   1  215.31    8.59 
  -1   0  -2  785.51   19.11 
   1   0   2  790.52   18.76 
   1   0  -2  742.82   26.05 
  -1   0   2  797.02   18.13 
   1   0  -3  929.68   20.28 
  -1   0  -4  250.08   10.51 
   1   0  -4  266.86   10.95 
  -1   0  -5 1050.32   22.68 
   1   0  -5  935.35   20.48 
  -1   0  -6 1668.19   33.61 
  -1   0  -7  241.53   10.48 
  -1   0  -8   68.77    4.75 
  -1   0  -9   37.87    4.35 
  -1   0 -10    7.57    3.60 
  -1   0 -11    2.55    3.69 
  -1   0 -12    2.79    2.97 
  -1   0  12    4.60    1.20 
  -1   0 -12    3.13    1.78 
  -1   0 -12    5.52    1.91 
   1   0  12    1.77    1.03 
  -1   0  12    6.50    1.88 
  -1   0  12    2.77    1.38 
  -1   0 -13   32.66    4.16 
  -1   0  13   30.35    1.79 
  -1   0 -13   34.99    2.65 
  -1   0 -13   30.72    2.11 
   1   0 -13   33.69    2.01 
   1   0  13   27.05    2.23 
  -1   0  13   28.47    1.88 
  -1   0 -14   12.20    4.00 
  -1   0  14   12.49    1.20 
  -1   0 -14   16.90    2.31 
  -1   0 -14   14.59    1.96 
   1   0 -14   13.43    1.65 
   1   0  14   10.42    1.93 
  -1   0  14   11.87    1.75 
  -1   0  15  104.46    4.10 
  -1   0 -15  101.21    4.60 
  -1   0 -15   95.11    4.35 
   1   0 -15   96.54    4.14 
   1   0  15  100.39    4.12 
  -1   0  15  109.30    4.47 
  -1   0  16   13.78    1.55 
  -1   0 -16   17.16    2.60 
  -1   0 -16   15.01    2.22 
   1   0 -16   14.08    2.03 
   1   0  16   12.20    2.41 
  -1   0  17   22.45    1.79 
  -1   0 -17   17.18    2.12 
  -1   0 -17   20.10    2.57 
   1   0 -17   25.28    2.73 
   1   0  17   18.12    2.26 
  -1   0 -18    2.35    1.86 
  -1   0 -18    4.25    1.81 
   1   0 -18    2.17    2.04 
   1   0  18    2.12    1.71 
  -1   0 -19    8.57    1.92 
  -1   0 -19   13.55    2.31 
   1   0 -19   10.44    1.88 
   1   0  19    8.75    1.69 
   1   0  20    0.54    1.82 
  -1   0 -20    1.08    2.27 
   1   0 -20    2.28    2.14 
  -1   0 -20    1.08    2.58 
   1   0  21    9.05    1.90 
  -1   0 -21    8.18    2.92 
   1   0 -21    6.12    2.82 
  -1   0 -21    5.78    2.29 
   1   0 -21    7.56    2.48 
  -1   1   0  227.43    9.73 
  -1  -1   0  210.24    7.67 
   1   1   0  207.15    7.87 
   1  -1   0  200.53    8.15 
  -1   1  -1 1638.82   32.26 
   1  -1  -1 1771.96   33.95 
   1   1   1 1741.63   32.84 
   1   1  -1 1653.47   31.55 
   1   1  -1 1699.25   32.32 
  -1  -1  -1 1669.63   33.39 
   1  -1  -2 3546.64   61.10 
   1   1   2 3753.27   63.34 
  -1  -1   2 3661.78   62.28 
  -1  -1  -2 3731.22   63.43 
   1   1  -2 3641.77   62.12 
  -1   1   2 3475.42   59.31 
   1  -1   2 3611.64   63.02 
  -1   1  -3  609.05   21.86 
   1   1   3  633.76   22.89 
   1   1  -3  694.70   24.35 
  -1  -1  -3  666.90   23.39 
  -1   1   3  612.08   21.70 
  -1   1  -4   44.05    4.00 
   1   1  -4   48.69    5.82 
  -1  -1  -4   55.18    4.34 
  -1   1  -5   97.32    5.65 
   1   1  -5  110.24    5.37 
  -1  -1  -5  117.05    5.54 
  -1   1  -6   41.18    3.49 
   1   1  -6   31.09    3.82 
  -1  -1  -6   39.82    4.31 
  -1   1  -7  360.66   14.08 
   1   1  -7  345.88   14.00 
  -1  -1  -7  350.64   13.90 
  -1  -1  -8  155.68    6.80 
   1   1  -8  150.55    6.91 
  -1   1  -9   31.31    3.68 
   1   1  -9   41.32    4.41 
  -1  -1  -9   37.06    3.37 
  -1   1 -10  119.35    6.64 
  -1  -1 -10  113.20    8.01 
   1   1 -10  121.09    6.84 
  -1   1 -11   10.19    2.48 
  -1   1 -11   13.38    1.59 
   1  -1 -11   12.09    3.34 
  -1  -1  11   11.40    1.23 
   1  -1 -11   11.58    1.73 
  -1  -1 -11   13.45    3.80 
   1   1 -11   11.58    1.77 
   1   1 -11   14.89    3.31 
  -1  -1 -11    9.40    1.50 
   1  -1  11    9.60    1.50 
  -1  -1 -11    8.82    1.42 
  -1   1 -12  166.78    9.40 
  -1  -1  12  155.78    5.97 
  -1  -1  12  156.73    6.25 
   1  -1 -12  156.39   12.03 
  -1   1 -12  153.66    6.37 
   1   1  12  156.74    6.36 
  -1   1 -12  163.00    7.03 
   1  -1 -12  157.21    6.52 
  -1  -1  12  164.64    6.51 
   1   1  12  157.35    6.16 
  -1  -1 -12  157.82    8.81 
  -1  -1 -12  159.39    6.46 
   1   1 -12  156.92    6.53 
  -1  -1 -12  158.19    6.58 
   1  -1  12  153.99    6.18 
   1   1 -12  143.57    7.85 
  -1   1  12  145.80    6.17 
  -1   1  12  146.60    5.66 
   1   1 -12  161.57    6.48 
  -1   1  12  166.67    6.50 
  -1   1 -13    6.73    3.57 
   1  -1 -13    9.90    1.92 
   1  -1 -13   10.34    2.91 
  -1  -1  13   11.29    1.32 
  -1   1 -13   12.58    2.27 
  -1  -1  13   10.99    1.59 
   1  -1 -13   10.24    2.06 
  -1   1 -13    9.87    1.39 
  -1  -1  13    7.94    1.43 
   1   1  13    6.77    1.34 
   1   1 -13    1.86    4.14 
  -1   1  13   11.60    1.38 
  -1  -1 -13    7.11    1.49 
  -1  -1 -13   10.26    1.46 
   1  -1  13   10.39    1.39 
   1   1 -13    7.62    2.35 
  -1  -1 -13    7.54    2.99 
  -1   1  13    8.04    1.87 
  -1   1  13   10.58    2.08 
   1   1 -13    7.08    1.96 
  -1   1  13   10.96    1.46 
  -1   1 -14   46.44    5.13 
   1  -1 -14   35.34    3.68 
  -1  -1  14   47.33    1.93 
  -1   1 -14   42.75    3.05 
   1  -1 -14   47.47    2.23 
   1  -1 -14   44.55    2.69 
  -1   1 -14   42.60    2.85 
  -1  -1  14   41.69    2.58 
  -1  -1  14   44.64    2.67 
   1   1  14   47.58    2.35 
   1   1 -14   39.56    4.27 
  -1   1  14   46.03    1.86 
   1   1 -14   45.73    2.47 
  -1  -1 -14   48.63    2.24 
   1  -1  14   50.00    2.80 
  -1  -1 -14   49.51    3.00 
  -1   1  14   45.50    2.19 
   1   1 -14   40.28    3.04 
  -1   1  14   47.98    1.98 
  -1  -1  15  101.26    3.93 
  -1   1 -15  101.85    4.86 
   1  -1 -15  106.82    4.47 
  -1  -1  15   92.12    3.77 
   1  -1 -15   97.39    4.24 
  -1   1 -15   99.02    4.31 
  -1  -1  15  102.00    4.27 
  -1  -1 -15   96.27    4.66 
   1   1 -15  100.85    4.62 
   1  -1  15   99.96    4.42 
   1   1 -15  102.77    4.59 
  -1   1  15   94.50    3.91 
  -1  -1 -15  102.66    4.39 
  -1   1  15  107.60    4.41 
  -1  -1  16   34.92    2.12 
  -1   1 -16   35.28    2.79 
   1  -1 -16   31.24    2.42 
  -1   1 -16   33.61    2.92 
   1   1  16   34.07    2.61 
   1  -1 -16   32.82    2.65 
  -1  -1  16   27.36    2.35 
  -1  -1 -16   42.64    3.22 
  -1  -1 -16   33.82    2.83 
   1  -1  16   40.84    2.65 
   1   1 -16   32.59    2.24 
  -1   1  16   30.31    2.54 
  -1  -1  17    7.75    1.45 
  -1   1 -17    5.74    1.67 
   1  -1 -17    8.99    2.50 
  -1   1 -17    9.49    2.27 
  -1  -1  17    5.11    1.51 
   1  -1 -17    7.32    2.48 
   1   1  17   11.90    2.02 
  -1  -1 -17    7.00    2.33 
  -1  -1 -17   12.17    2.17 
   1  -1  17    9.38    2.01 
   1   1 -17    6.42    2.42 
  -1   1  17    9.73    2.15 
  -1  -1  18    1.46    1.18 
  -1   1 -18    1.29    1.56 
   1  -1 -18   -0.18    2.04 
  -1   1 -18    2.44    1.68 
  -1  -1  18   -1.20    1.68 
   1  -1 -18   -2.46    2.10 
   1   1  18   -0.75    1.71 
  -1  -1 -18    5.77    2.22 
  -1  -1 -18    2.22    2.13 
   1  -1  18    2.60    1.80 
   1   1 -18   -2.27    2.24 
  -1   1  18    2.01    1.27 
   1  -1 -19    4.90    2.50 
   1  -1 -19    7.45    2.03 
  -1   1 -19    6.41    2.27 
   1   1  19    7.50    2.00 
  -1   1 -19    7.73    2.58 
   1  -1  19    6.51    1.76 
   1   1 -19    3.67    2.48 
  -1  -1 -19    6.75    2.56 
  -1   1  19    7.52    2.04 
  -1  -1 -19    7.34    2.31 
   1  -1 -20    1.89    2.08 
   1   1  20    2.73    1.92 
  -1   1 -20    0.90    2.38 
  -1   1 -20    1.33    2.36 
   1  -1 -20   -0.63    2.04 
   1  -1  20    2.53    1.56 
  -1  -1 -20   -0.50    2.04 
  -1   1  20   -0.06    1.87 
   1   1 -20    2.11    2.41 
  -1  -1 -20    2.84    2.54 
   1   1  21    1.37    1.76 
  -1   1 -21   -0.16    2.54 
   1  -1 -21   -1.18    2.31 
   1  -1 -21    3.35    2.09 
   1  -1  21    1.24    1.53 
  -1  -1 -21    0.34    2.39 
  -1   1  21   -1.27    1.46 
  -1  -1 -21    0.23    2.46 
  -1  -2   0   48.43    4.43 
  -1  -2   0   45.82    3.81 
   1   2   0   44.46    3.35 
  -1   2   0   47.14    5.47 
   1  -2   0   48.28    3.85 
  -1   2  -1 6868.27  113.61 
  -1  -2   2 1125.42   23.35 
   1  -2  -2 1044.72   21.71 
  -1   2  -2 1108.34   26.23 
  -1  -2  -2 1042.84   21.59 
  -1  -2  -2 1098.84   22.85 
  -1   2   2 1118.45   22.80 
   1  -2  -3  999.76   21.40 
  -1  -2  -3 1061.31   21.90 
  -1   2   3  987.56   20.63 
   1  -2  -4 1774.60   34.23 
   1   2  -4 1839.45   34.44 
  -1  -2  -4 1891.95   36.34 
   1  -2  -5   20.48    3.51 
   1   2  -5   19.49    2.78 
  -1  -2  -5   17.22    3.08 
   1  -2  -6  108.63    5.01 
   1   2  -6  117.40    5.86 
  -1  -2  -6  115.15    5.74 
   1  -2  -7  843.53   18.80 
   1   2  -7  793.44   18.94 
  -1  -2  -7  771.21   17.39 
   1  -2  -8  412.92   15.66 
   1   2  -8  433.96   17.05 
  -1  -2  -8  428.26   16.45 
   1  -2  -9    3.80    3.08 
   1   2  -9    5.03    3.37 
  -1  -2  -9    2.66    2.24 
  -1   2 -10   83.45    6.68 
   1  -2 -10   89.69    6.53 
   1   2 -10   91.90    6.96 
  -1  -2 -10   88.63    6.80 
  -1   2 -11   96.08    7.07 
   1  -2 -11   77.60    4.73 
  -1   2 -11   88.85    5.35 
   1  -2 -11   81.82    6.94 
  -1  -2  11   74.35    4.23 
  -1  -2  11   88.12    5.14 
  -1  -2  11   77.37    4.56 
  -1  -2 -11   99.39    7.20 
  -1  -2 -11   81.38    4.94 
   1  -2  11   72.92    4.43 
   1   2 -11   84.43    6.80 
  -1   2  11   87.19    5.09 
   1   2 -11   84.02    5.20 
  -1   2 -12   24.33    3.04 
  -1  -2  12   17.98    1.81 
   1  -2 -12   20.14    3.83 
  -1  -2  12   22.04    1.59 
  -1   2 -12   24.21    2.16 
  -1   2 -12   18.27    1.89 
   1  -2 -12   22.59    2.23 
  -1  -2  12   25.20    1.87 
   1   2  12   22.93    2.09 
   1   2 -12   27.45    3.37 
   1  -2  12   23.47    1.67 
   1   2 -12   20.30    2.17 
  -1  -2 -12   21.94    1.76 
  -1  -2 -12   22.04    2.32 
   1  -2  12   20.37    1.93 
  -1  -2 -12   24.01    4.09 
  -1   2  12   18.71    1.75 
  -1   2  12   19.92    1.79 
   1   2 -12   25.16    2.16 
  -1   2  12   20.55    1.81 
   1  -2 -13  136.39    5.40 
   1  -2 -13  133.26    7.25 
  -1  -2  13  144.26    5.52 
  -1  -2  13  143.27    5.39 
  -1   2 -13  140.36    5.84 
  -1  -2  13  141.93    5.51 
   1  -2 -13  131.31    5.29 
  -1   2 -13  141.10    5.66 
   1   2  13  139.89    5.19 
   1   2 -13  146.07    5.91 
  -1  -2 -13  130.58    4.84 
  -1  -2 -13  145.75    5.88 
   1   2 -13  129.65    5.30 
   1  -2  13  135.84    5.35 
   1  -2  13  139.37    5.08 
  -1  -2 -13  135.93    7.92 
  -1   2  13  135.12    5.12 
  -1   2  13  129.78    5.62 
  -1  -2 -13  144.20    5.94 
  -1   2  13  142.48    5.27 
  -1   2 -14   90.51    6.65 
   1  -2 -14   98.87    4.00 
  -1  -2  14  108.44    3.82 
   1  -2 -14   98.04    6.61 
   1   2  14  105.15    4.25 
  -1   2 -14  108.42    4.71 
  -1   2 -14  114.95    4.77 
   1  -2 -14   99.52    4.19 
  -1  -2  14   99.21    3.98 
  -1  -2  14  104.72    4.03 
  -1  -2 -14   90.74    6.15 
  -1  -2 -14  103.20    4.40 
   1   2 -14  103.49    5.05 
  -1  -2 -14  106.42    4.55 
   1   2 -14   86.74    6.43 
   1  -2  14  104.33    4.17 
   1  -2  14  100.88    3.76 
  -1   2  14  102.29    3.97 
   1   2 -14   97.20    4.19 
  -1   2  14  106.49    4.23 
   1   2  15    0.54    1.46 
  -1  -2  15    0.94    1.22 
  -1   2 -15   -0.11    2.23 
   1  -2 -15   -0.88    1.67 
   1  -2 -15    0.45    1.37 
  -1   2 -15    1.14    1.35 
  -1  -2  15   -0.41    1.41 
  -1  -2 -15    1.79    1.95 
  -1  -2 -15    2.68    1.98 
   1   2 -15   -0.20    1.85 
   1  -2  15    0.91    1.80 
   1   2 -15    1.21    1.97 
   1  -2  15    0.13    1.22 
  -1   2  15   -0.50    1.28 
  -1   2  15    1.01    1.55 
   1   2  16   34.17    2.48 
  -1  -2  16   34.53    2.02 
  -1   2 -16   28.77    2.72 
   1  -2 -16   28.74    2.42 
   1  -2 -16   33.53    2.92 
  -1   2 -16   30.51    2.61 
  -1  -2  16   31.62    2.48 
  -1  -2 -16   30.83    2.31 
  -1  -2 -16   31.83    2.56 
   1   2 -16   29.48    2.92 
   1  -2  16   29.88    2.44 
   1   2 -16   33.03    2.67 
   1  -2  16   30.07    1.94 
  -1   2  16   40.07    2.79 
  -1  -2  17   13.64    1.15 
  -1   2 -17   20.41    2.48 
   1  -2 -17   13.89    2.12 
   1  -2 -17   15.15    2.49 
  -1   2 -17   15.54    2.68 
  -1  -2  17   12.72    1.63 
   1   2  17   13.95    1.93 
  -1  -2 -17   15.76    2.34 
  -1  -2 -17   11.88    2.12 
   1  -2  17   13.45    2.00 
   1   2 -17   12.92    2.35 
   1   2 -17   12.21    2.19 
  -1   2  17   15.58    1.67 
  -1  -2  18   16.65    1.57 
   1  -2 -18   18.93    2.35 
  -1  -2  18   15.71    1.75 
   1  -2 -18   12.33    2.37 
  -1   2 -18   17.20    2.45 
   1   2  18   13.05    1.89 
  -1  -2 -18   12.16    1.83 
   1   2 -18   12.33    2.25 
  -1  -2 -18   15.18    1.93 
   1   2 -18   16.21    2.52 
  -1   2  18   16.97    1.96 
  -1  -2  19    9.12    1.43 
   1   2  19    9.94    1.81 
   1  -2 -19    8.59    2.05 
   1  -2 -19   11.46    2.23 
  -1   2 -19    6.34    2.63 
  -1   2 -19    9.98    2.52 
  -1  -2  19   11.01    2.34 
   1   2 -19   11.36    2.24 
   1   2 -19    9.96    2.80 
  -1  -2 -19   11.93    2.21 
   1  -2  19   12.45    1.68 
  -1   2  19    8.92    1.52 
  -1  -2 -19   12.27    2.23 
   1  -2 -20    1.22    2.10 
  -1   2 -20    2.31    2.36 
  -1  -2  20    1.75    1.52 
   1   2  20    2.88    1.95 
   1  -2 -20    0.84    2.02 
  -1  -2 -20   -1.20    2.14 
  -1   2  20    0.65    2.01 
   1  -2  20    2.06    1.67 
   1   2 -20    3.53    2.42 
  -1  -2 -20    5.04    2.42 
  -1   2 -21    2.93    2.66 
  -1  -2  21    5.52    1.99 
   1   2  21    6.10    2.10 
   1  -2 -21    4.64    2.62 
   1  -2 -21    4.07    2.16 
  -1  -2 -21    4.53    2.40 
   1  -2  21    6.36    1.82 
   1   2 -21    4.29    2.35 
  -1  -2 -21    4.33    2.68 
  -1   2  21    5.21    1.73 
  -1   3   0 1473.88   29.97 
   1   3   1 4244.10   73.44 
   1  -3   1 4211.46   70.63 
  -1   3  -2  495.79   18.23 
   1   3   2  463.54   18.23 
   1  -3  -2  513.43   18.56 
  -1   3  -2  484.25   19.29 
  -1  -3  -2  502.29   18.59 
   1   3  -2  468.88   17.73 
  -1   3   2  444.92   17.23 
  -1   3  -3  303.82   12.06 
   1  -3  -3  263.81   11.02 
  -1   3  -3  281.57   12.52 
   1   3  -3  313.50   12.19 
  -1  -3  -3  310.52   11.76 
  -1   3   3  302.25   11.92 
  -1  -3  -3  300.46   12.99 
  -1   3  -4  221.67    9.43 
   1  -3  -4  259.82   10.68 
   1   3  -4  248.43   10.42 
  -1  -3  -4  237.36   10.33 
  -1   3   4  258.69   11.33 
  -1  -3  -4  233.02   10.49 
   1  -3  -5  330.19   13.03 
   1   3  -5  332.67   13.16 
  -1  -3  -5  321.58   12.87 
   1  -3  -6  104.61    5.31 
   1   3  -6  109.67    5.19 
  -1  -3  -6  104.70    5.34 
   1  -3  -7  315.94   12.38 
   1   3  -7  334.87   13.22 
  -1  -3  -7  310.46   12.42 
   1  -3  -8  591.34   21.55 
   1   3  -8  645.76   22.90 
  -1  -3  -8  652.95   23.30 
   1  -3  -9  143.76    7.87 
   1   3  -9  135.39    7.25 
  -1  -3  -9  138.33    7.41 
   1  -3 -10    3.23    3.01 
   1   3 -10    6.49    3.70 
  -1  -3 -10    0.19    2.82 
   1   3  11   35.96    2.13 
   1  -3 -11   32.75    1.87 
   1  -3 -11   32.77    3.33 
  -1  -3  11   31.88    1.65 
  -1  -3  11   36.14    2.49 
   1  -3 -11   30.37    1.89 
   1  -3  11   30.09    1.51 
  -1  -3 -11   32.13    2.20 
  -1  -3 -11   39.00    4.14 
  -1  -3 -11   32.79    1.73 
  -1  -3 -11   26.12    2.32 
   1   3 -11   30.12    2.18 
   1   3 -11   38.72    3.75 
  -1   3  11   30.79    1.77 
   1   3  12   15.20    1.70 
   1  -3 -12   18.33    1.86 
   1  -3 -12   13.97    3.85 
  -1  -3  12   15.86    1.42 
  -1  -3  12   19.35    1.90 
   1  -3 -12   20.47    1.43 
   1  -3  12   17.38    1.30 
  -1  -3 -12   18.82    1.99 
  -1  -3 -12   17.55    3.70 
  -1  -3 -12   18.21    1.67 
  -1  -3 -12   19.24    2.17 
   1   3 -12   15.93    1.75 
   1   3 -12   16.55    3.11 
  -1   3  12   18.19    1.96 
  -1   3  12   19.21    1.42 
   1   3  13  142.14    5.32 
   1  -3 -13  132.62    5.33 
   1  -3 -13  129.69    7.52 
  -1   3 -13  134.79    5.56 
  -1  -3  13  133.34    4.96 
  -1  -3  13  140.31    5.54 
  -1  -3 -13  139.76    5.59 
  -1  -3 -13  125.58    6.94 
  -1  -3 -13  135.60    5.06 
   1  -3  13  136.92    5.05 
  -1  -3 -13  141.71    5.72 
   1   3 -13  152.30    6.20 
   1   3 -13  135.70    8.53 
  -1   3  13  124.63    4.78 
  -1  -3 -13  135.68    5.74 
  -1   3  13  139.35    5.29 
   1   3  14   23.67    1.92 
   1  -3 -14   27.97    3.48 
  -1   3 -14   23.23    5.72 
  -1  -3  14   24.33    1.61 
  -1   3 -14   29.87    2.42 
   1  -3 -14   27.56    2.35 
  -1  -3  14   29.56    1.81 
  -1  -3 -14   26.56    3.68 
   1  -3  14   32.30    2.01 
  -1  -3 -14   26.02    1.98 
   1   3 -14   28.19    2.48 
   1   3 -14   27.54    2.34 
   1   3 -14   24.28    4.02 
  -1   3  14   29.32    2.41 
  -1  -3 -14   23.61    2.43 
  -1   3  14   28.97    1.97 
  -1  -3  15    6.92    1.16 
   1   3  15    4.44    1.68 
   1  -3 -15    3.50    2.14 
  -1   3 -15    6.26    1.83 
  -1  -3  15    5.76    1.76 
   1  -3  15    4.53    1.30 
  -1  -3 -15    5.37    1.51 
   1   3 -15    6.34    2.21 
   1   3 -15    3.87    2.31 
  -1   3  15    6.94    1.88 
  -1   3  15    3.39    1.71 
  -1  -3  16   35.97    2.06 
   1   3  16   31.09    2.34 
   1  -3 -16   29.53    2.39 
  -1   3 -16   33.37    2.73 
  -1  -3  16   29.94    2.31 
   1  -3  16   29.75    2.00 
  -1  -3 -16   24.34    2.61 
   1   3 -16   33.95    2.84 
   1   3 -16   40.17    2.92 
  -1   3  16   28.18    2.43 
  -1  -3  17    7.80    1.40 
   1   3  17    8.75    1.78 
   1  -3 -17    8.35    2.31 
  -1   3 -17   10.57    2.25 
  -1  -3  17   10.50    2.23 
   1  -3  17    6.62    1.21 
  -1  -3 -17   10.04    2.03 
   1   3 -17    7.46    2.21 
   1   3 -17    6.18    2.30 
  -1   3  17   10.93    1.47 
  -1  -3  18   16.66    1.82 
   1  -3 -18   18.22    2.21 
  -1  -3  18   19.37    2.37 
   1  -3 -18   15.01    2.21 
   1   3  18   16.48    1.91 
   1   3 -18   17.50    2.25 
  -1  -3 -18   15.68    2.16 
  -1   3  18   14.52    1.65 
  -1  -3  19   -0.01    1.27 
   1  -3 -19   -0.70    2.00 
  -1  -3  19   -0.08    1.47 
   1  -3 -19    0.74    2.14 
   1   3  19    1.49    1.91 
  -1  -3 -19    2.35    2.01 
  -1  -3 -19    1.92    1.60 
  -1   3  19    3.15    2.27 
   1   3 -19    2.13    2.39 
   1  -3 -20    0.33    2.03 
  -1  -3  20    1.05    1.49 
   1   3  20    0.76    1.68 
   1  -3 -20    1.85    2.18 
  -1  -3 -20   -0.42    2.22 
  -1   3  20    2.11    1.62 
   1   3 -20    2.12    2.75 
  -1  -3 -20    1.79    2.57 
  -1  -3  21    4.25    1.72 
  -1   3 -21    7.77    2.47 
   1  -3 -21    3.76    2.21 
   1  -3 -21    3.50    2.80 
  -1  -3 -21    5.15    2.63 
  -1   3  21    5.87    1.96 
   1   3 -21    5.29    2.71 
  -1  -4   0   60.85    6.35 
   1  -4   0   64.70    4.95 
  -1   4   0   53.92    4.62 
   1   4   0   47.20   10.25 
  -1   4  -1  694.90   25.40 
   1  -4  -1  700.82   24.54 
  -1  -4   1  665.29   24.38 
   1   4   1  659.77   30.06 
   1  -4   1  705.16   24.79 
  -1   4   1  619.08   22.75 
  -1  -4  -1  728.55   25.73 
   1  -4  -2   91.45    5.26 
  -1   4  -2  116.04    5.82 
   1   4  -2  102.64    5.42 
  -1  -4  -2  110.78    5.13 
   1  -4   2  107.04    5.66 
  -1   4   2  119.05    6.13 
  -1   4  -3  220.85    9.51 
   1  -4  -3  204.21    8.38 
  -1   4  -3  222.91   11.04 
   1   4  -3  209.18    8.21 
  -1  -4  -3  211.99    8.21 
  -1   4   3  202.30    8.35 
  -1  -4  -3  216.07   13.08 
  -1   4  -4  458.13   17.51 
   1  -4  -4  419.11   16.44 
  -1   4  -4  444.85   19.44 
   1   4  -4  468.74   18.02 
  -1  -4  -4  422.76   16.07 
  -1   4   4  429.63   16.74 
  -1  -4  -4  445.85   17.72 
  -1   4  -5  396.52   15.55 
   1  -4  -5  372.57    8.80 
   1   4  -5  385.27   14.91 
  -1  -4  -5  372.20    9.59 
  -1   4  -6  724.08   26.00 
   1  -4  -6  777.44   18.05 
   1   4  -6  728.78   26.04 
  -1  -4  -6  763.84   13.45 
  -1   4  -7  315.81   12.68 
   1  -4  -7  320.73   12.48 
   1   4  -7  342.52   13.04 
  -1  -4  -7  295.95   12.09 
  -1   4  -8  175.99    7.27 
   1  -4  -8  192.60    7.49 
   1   4  -8  164.82    7.65 
  -1  -4  -8  179.59    6.94 
  -1   4  -9   90.97    7.12 
   1  -4  -9   79.62    6.19 
   1   4  -9   85.77    6.79 
  -1  -4  -9   88.68    6.55 
  -1   4 -10    4.25    2.60 
  -1  -4  10    4.23    1.08 
  -1   4 -10    5.02    1.25 
   1  -4 -10    6.46    3.11 
  -1  -4  10    5.21    1.34 
   1  -4 -10    5.55    1.50 
  -1  -4 -10    6.88    2.89 
   1   4 -10    3.25    3.12 
  -1  -4 -10    8.23    1.60 
   1  -4  10    6.69    1.45 
  -1  -4 -10    4.05    0.95 
  -1   4 -11   71.56    5.52 
  -1  -4  11   68.27    3.32 
  -1  -4  11   65.36    2.12 
   1  -4 -11   71.34    4.85 
  -1  -4  11   65.58    2.29 
  -1  -4  11   75.16    3.35 
  -1   4 -11   70.63    3.73 
   1   4  11   67.30    3.27 
   1  -4 -11   67.76    3.32 
   1  -4 -11   72.04    3.36 
   1   4 -11   75.37    5.74 
   1  -4  11   71.67    4.07 
  -1  -4 -11   70.67    4.75 
  -1  -4 -11   76.02    3.46 
  -1  -4 -11   69.31    3.38 
   1  -4  11   72.78    3.39 
   1  -4  11   69.52    3.03 
  -1  -4 -11   73.61    3.82 
  -1   4  11   69.69    3.39 
   1   4 -11   72.29    3.98 
  -1   4 -12   18.28    4.15 
  -1   4 -12   31.88    2.25 
  -1  -4  12   24.25    1.81 
   1  -4 -12   23.27    3.53 
  -1   4 -12   19.55    4.28 
  -1  -4  12   25.84    2.32 
  -1  -4  12   29.00    1.41 
   1  -4 -12   26.82    1.96 
  -1  -4  12   28.56    1.73 
   1  -4 -12   30.34    1.91 
   1  -4 -12   28.57    1.83 
   1   4  12   24.11    1.88 
   1   4 -12   31.50    4.18 
  -1  -4 -12   27.28    3.28 
  -1  -4 -12   26.87    1.90 
  -1  -4 -12   31.89    2.04 
   1  -4  12   26.12    1.68 
   1  -4  12   28.85    1.65 
  -1  -4 -12   26.14    1.80 
  -1   4  12   30.40    1.68 
   1   4 -12   26.68    2.25 
  -1   4 -13   38.61    4.57 
  -1   4 -13   43.39    3.00 
  -1  -4  13   41.09    2.66 
   1  -4 -13   39.33    4.69 
  -1   4 -13   32.12    4.19 
  -1  -4  13   39.48    2.25 
  -1  -4  13   39.24    2.33 
   1  -4 -13   37.71    2.88 
   1  -4 -13   36.17    2.82 
   1  -4 -13   37.52    2.19 
   1   4  13   40.90    2.70 
  -1  -4 -13   49.27    3.91 
   1   4 -13   29.89    3.83 
   1   4 -13   43.91    2.97 
  -1  -4 -13   46.07    2.25 
  -1  -4 -13   45.08    2.60 
   1  -4  13   43.43    3.13 
   1  -4  13   44.73    2.33 
  -1  -4 -13   38.90    2.68 
  -1   4  13   46.17    2.30 
  -1   4 -14    0.57    2.99 
   1  -4 -14    2.24    1.48 
   1  -4 -14    3.95    2.94 
  -1   4 -14    4.89    4.43 
  -1  -4  14    3.40    1.29 
  -1   4 -14    7.03    2.24 
  -1  -4  14    2.13    1.69 
   1  -4 -14    3.57    1.36 
   1   4  14    1.45    1.61 
  -1  -4 -14    5.23    3.29 
   1  -4  14    2.64    1.37 
   1   4 -14    1.41    2.11 
  -1  -4 -14    0.89    1.35 
  -1  -4 -14    0.87    1.70 
   1  -4  14    7.55    2.09 
  -1  -4 -14    1.43    2.02 
   1   4 -14    5.55    4.24 
  -1   4  14    0.16    1.43 
  -1  -4 -14    5.32    2.08 
   1  -4 -15    7.37    2.04 
  -1  -4  15    7.59    1.51 
  -1  -4  15    5.34    1.73 
   1   4  15    5.99    1.74 
   1  -4 -15    8.48    2.25 
  -1  -4 -15    9.26    1.94 
   1  -4  15   10.72    1.46 
   1  -4  15    9.90    1.91 
   1   4 -15    4.89    1.72 
  -1  -4 -15    7.19    2.00 
  -1   4  15    6.83    1.82 
  -1  -4 -15    3.62    2.68 
   1   4  16   23.00    2.13 
  -1  -4  16   19.29    1.58 
  -1  -4  16   22.32    1.85 
   1  -4 -16   18.46    2.56 
   1  -4 -16   18.12    2.38 
   1  -4  16   20.06    1.72 
   1  -4  16   20.39    1.71 
  -1  -4 -16   18.89    2.41 
   1   4 -16   23.80    2.69 
  -1  -4 -16   20.03    2.48 
  -1   4  16   18.19    2.03 
  -1  -4 -16   19.63    2.64 
   1  -4 -17    8.02    2.13 
  -1  -4  17    9.98    1.44 
   1  -4 -17    8.63    2.10 
   1   4  17    9.97    1.49 
  -1  -4 -17   11.38    2.14 
  -1  -4 -17   13.02    2.43 
   1  -4  17   12.11    1.68 
   1  -4  17   10.36    1.48 
  -1   4  17    9.87    2.07 
   1   4  18    3.21    2.07 
  -1  -4  18    2.04    1.34 
   1  -4 -18   -2.13    1.99 
  -1  -4  18    1.25    1.32 
  -1  -4 -18    2.65    2.21 
  -1  -4 -18   -2.72    2.25 
   1  -4  18    0.27    1.38 
  -1   4  18   -1.33    1.13 
   1   4 -18   -2.17    2.61 
  -1  -4  19    5.79    1.44 
   1   4  19    9.15    2.04 
   1  -4 -19    8.40    2.07 
  -1  -4  19    8.78    1.92 
  -1  -4 -19    6.59    2.42 
  -1   4  19    4.00    1.80 
   1   4 -19    5.33    2.79 
  -1  -4  20   10.35    1.86 
   1  -4 -20   12.32    2.44 
  -1  -4  20   11.42    1.83 
   1   4  20   12.17    2.22 
  -1   4  20    9.04    1.90 
   1   4 -20   10.32    2.64 
  -1  -4 -20    8.87    2.86 
  -1  -4  21    5.03    2.60 
   1   4 -21    2.29    2.81 
  -1  -5   0   28.94    3.09 
   1  -5   0   38.33    4.53 
  -1   5   0   43.93    4.04 
   1   5   0   35.97    3.97 
  -1   5  -1  772.40   19.82 
   1   5   1  677.80   25.75 
   1  -5   1  766.15   19.34 
  -1  -5  -1  757.73   13.65 
   1  -5  -2  348.60   14.02 
  -1   5  -2  387.77   15.46 
  -1  -5   2  395.27   15.64 
  -1   5   2  384.81   15.67 
   1  -5   2  371.18    9.19 
   1   5  -2  366.04   10.72 
   1  -5  -3   64.02    3.93 
  -1   5  -3   64.01    4.61 
   1   5  -3   65.37    4.08 
  -1  -5  -3   63.71    4.05 
   1  -5   3   62.64    4.58 
  -1   5   3   59.74    4.32 
  -1   5  -4  189.26    7.52 
  -1   5  -4  180.69    9.02 
   1  -5  -4  194.04    7.78 
   1   5  -4  182.99    7.91 
  -1   5   4  185.69    7.53 
  -1  -5  -4  178.56    7.03 
  -1   5  -5  321.65   12.63 
  -1   5  -5  313.75   13.14 
   1  -5  -5  290.44   11.78 
  -1  -5  -5  303.62   12.03 
   1   5  -5  284.31   11.90 
  -1   5  -6   44.10    3.75 
  -1   5  -6   40.11    4.09 
   1  -5  -6   44.47    3.70 
  -1  -5  -6   41.23    3.57 
   1   5  -6   40.88    4.12 
  -1   5  -7  158.17    7.21 
  -1   5  -7  142.55    7.38 
   1  -5  -7  165.93    7.09 
  -1  -5  -7  152.40    6.39 
   1   5  -7  154.80    7.02 
  -1   5  -8   46.23    4.26 
  -1   5  -8   40.43    4.25 
   1  -5  -8   41.08    3.93 
  -1  -5  -8   43.10    3.95 
   1   5  -8   41.78    3.69 
  -1   5  -9   37.94    4.35 
  -1   5  -9   33.04    4.36 
   1  -5  -9   31.96    3.78 
  -1  -5  -9   41.07    3.42 
   1   5  -9   33.18    4.06 
  -1   5 -10   95.88    6.57 
  -1   5 -10   91.35    7.06 
   1  -5 -10   99.92    4.55 
   1  -5 -10   93.43    5.58 
  -1  -5  10  105.88    4.39 
   1  -5 -10  102.59    4.54 
  -1   5 -10   99.38    4.71 
  -1  -5  10   96.97    4.40 
   1   5 -10  111.10    6.96 
  -1  -5 -10  112.75    6.96 
   1   5 -10  100.14    4.66 
   1  -5  10   94.82    3.87 
  -1  -5 -10   99.07    4.32 
  -1  -5 -10   99.02    4.51 
   1  -5  10   99.47    4.53 
   1  -5  10  101.77    4.19 
  -1   5  10   94.70    4.13 
  -1   5 -11   15.30    3.91 
   1  -5 -11   16.40    1.57 
   1  -5 -11   17.20    3.30 
  -1   5 -11   19.39    4.46 
  -1  -5  11   15.09    1.52 
  -1   5 -11   16.00    2.18 
  -1  -5  11   14.67    1.39 
   1  -5 -11   14.93    1.66 
  -1  -5  11   17.92    2.16 
   1   5  11   15.16    1.85 
   1  -5 -11   14.16    1.65 
  -1  -5 -11   16.64    2.68 
   1  -5  11   16.12    1.18 
   1   5 -11   13.16    2.14 
   1  -5  11   16.78    1.45 
  -1  -5 -11   13.96    1.60 
  -1  -5 -11   15.05    1.64 
   1  -5  11   15.04    1.91 
  -1  -5 -11   12.24    2.09 
   1   5 -11   14.35    3.61 
  -1   5  11   16.83    1.81 
  -1   5 -12   24.39    4.09 
   1  -5 -12   25.50    1.77 
   1  -5 -12   26.32    3.57 
  -1   5 -12   32.70    4.61 
  -1  -5  12   29.72    1.73 
  -1   5 -12   32.37    2.37 
  -1  -5  12   26.55    1.70 
   1  -5 -12   27.40    1.75 
  -1  -5  12   22.72    1.73 
   1   5  12   23.17    1.88 
   1  -5 -12   28.33    2.15 
  -1  -5 -12   24.59    4.36 
   1  -5  12   27.54    1.55 
   1   5 -12   25.64    2.42 
   1  -5  12   27.80    1.79 
  -1  -5 -12   27.02    1.81 
  -1  -5 -12   27.95    2.15 
   1  -5  12   24.91    2.01 
  -1  -5 -12   29.11    2.04 
   1   5 -12   20.57    4.20 
  -1   5  12   22.56    1.91 
  -1   5 -13    5.47    4.44 
   1  -5 -13    8.01    1.88 
  -1  -5  13   11.95    1.89 
   1  -5 -13    7.70    3.28 
   1  -5 -13    9.03    1.35 
  -1  -5  13   11.59    1.09 
  -1  -5  13    7.89    1.61 
   1  -5 -13    8.04    1.72 
   1   5  13   11.12    1.40 
  -1  -5 -13    9.32    1.80 
   1  -5  13    9.93    1.37 
  -1  -5 -13   10.95    1.80 
   1   5 -13    7.88    2.42 
   1   5 -13    9.11    4.50 
  -1  -5 -13   10.22    3.12 
  -1  -5 -13    4.85    2.08 
  -1   5  13    7.48    1.59 
   1   5  14    0.30    1.66 
  -1  -5  14    3.18    1.35 
  -1   5 -14    1.59    3.02 
  -1  -5  14    5.00    1.52 
   1  -5 -14    3.56    1.79 
  -1  -5  14    4.94    2.02 
   1  -5 -14    4.25    1.34 
   1  -5 -14    2.28    1.42 
  -1  -5 -14    1.32    1.95 
  -1  -5 -14    4.39    1.49 
  -1  -5 -14    2.20    1.43 
   1  -5  14    3.46    1.72 
   1  -5  14    4.21    1.25 
  -1   5  14    2.45    1.61 
   1   5 -14   -3.68    2.27 
  -1  -5 -14    2.29    2.31 
  -1  -5  15   61.92    3.03 
  -1  -5  15   64.57    2.90 
   1   5  15   60.95    3.12 
   1  -5 -15   65.50    3.49 
   1  -5 -15   65.44    3.42 
  -1   5 -15   56.23    3.98 
  -1  -5  15   64.30    3.43 
   1   5 -15   64.43    3.70 
   1  -5  15   66.75    2.96 
  -1  -5 -15   62.46    3.33 
  -1  -5 -15   60.52    3.53 
   1  -5  15   69.83    3.59 
  -1   5  15   66.19    3.49 
  -1  -5 -15   62.81    3.09 
  -1  -5 -15   65.94    4.04 
   1  -5 -16    3.16    2.31 
  -1  -5  16    6.30    1.04 
  -1  -5  16    6.96    1.74 
  -1   5 -16    6.78    1.98 
   1   5  16    8.15    2.14 
  -1  -5 -16    4.77    2.19 
   1  -5  16    4.68    1.09 
   1  -5  16    5.20    1.56 
  -1   5  16    6.48    1.94 
  -1  -5 -16    5.01    2.34 
   1   5 -16    8.50    2.68 
  -1  -5 -16    5.92    2.39 
   1  -5 -17   -0.37    2.05 
  -1  -5  17    1.81    1.42 
   1   5  17    1.86    1.67 
  -1   5 -17   -0.15    2.71 
  -1  -5  17    2.14    1.73 
   1  -5 -17    2.05    2.05 
   1  -5  17   -0.71    1.36 
  -1  -5 -17   -0.35    1.62 
  -1  -5 -17   -1.03    1.85 
  -1   5  17    1.73    1.30 
   1  -5  17    1.36    1.57 
   1   5 -17    0.12    2.34 
  -1  -5 -17   -0.79    2.46 
   1  -5 -18   11.11    2.11 
  -1  -5  18   11.04    1.33 
   1   5  18   11.42    2.07 
  -1   5 -18   12.48    2.85 
  -1  -5  18   13.96    1.91 
   1  -5 -18   14.05    2.41 
   1  -5  18   10.20    1.49 
  -1  -5 -18    9.36    2.26 
  -1  -5 -18    6.43    2.00 
  -1   5  18   10.59    2.04 
   1  -5  18    9.86    1.65 
   1   5 -18   11.25    2.84 
   1  -5 -19    7.97    2.02 
  -1  -5  19    7.26    1.23 
   1   5  19    4.44    2.11 
  -1   5 -19    6.22    2.51 
  -1  -5  19    7.23    1.69 
   1  -5 -19    7.10    1.98 
   1  -5  19    4.81    1.62 
  -1  -5 -19    4.25    2.00 
  -1  -5 -19    5.82    2.22 
  -1   5  19    7.15    1.88 
   1  -5  19    4.85    1.64 
   1   5 -19    5.74    2.55 
  -1  -5  20   16.33    2.05 
   1  -5 -20   16.86    2.56 
   1  -5 -20   16.22    2.44 
  -1  -5  20   16.65    2.12 
  -1   5 -20   18.85    2.66 
   1  -5  20   17.79    1.70 
  -1   5  20   14.89    2.29 
  -1  -5 -20   18.05    2.58 
   1   5 -20   19.52    2.35 
  -1  -6   0  647.71   23.20 
   1  -6   0  648.46   23.53 
  -1   6   0  659.65   24.23 
   1   6   0  648.11   24.34 
   1   6   1  368.84   14.36 
   1  -6  -1  373.42    9.64 
  -1   6  -1  351.48   13.98 
  -1  -6  -1  373.37    9.47 
  -1   6   1  361.13   14.47 
   1  -6   1  381.83   15.30 
   1   6  -1  373.87   10.70 
  -1  -6   2  561.69   20.80 
   1  -6  -2  614.96   22.49 
  -1   6  -2  579.42   21.75 
  -1  -6  -2  595.01   21.11 
  -1   6   2  582.59   21.67 
   1  -6   2  586.89   21.68 
   1   6  -2  602.59   22.70 
  -1  -6   3  212.27    8.02 
   1  -6  -3  215.35    6.65 
  -1   6  -3  239.87   11.57 
  -1  -6  -3  248.20    9.96 
  -1   6   3  238.30   10.34 
   1  -6   3  198.27    8.28 
   1   6  -3  201.29    8.88 
   1  -6  -4   54.53    3.77 
  -1   6  -4   54.51    4.37 
   1   6  -4   57.39    4.00 
  -1  -6  -4   53.30    3.86 
   1  -6   4   54.21    4.45 
  -1   6   4   53.67    3.79 
  -1   6  -5    2.39    2.82 
  -1   6  -5   -0.86    3.85 
   1  -6  -5   -1.72    3.06 
  -1  -6  -5    2.99    2.45 
   1   6  -5    1.28    2.85 
  -1   6  -6  105.60    7.63 
  -1   6  -6   97.31    8.03 
   1  -6  -6  116.35    6.01 
  -1  -6  -6  107.88    7.17 
   1   6  -6  119.87    7.01 
  -1   6  -7   71.56    5.89 
  -1   6  -7   61.40    5.53 
   1  -6  -7   73.80    6.14 
  -1  -6  -7   79.70    5.76 
   1   6  -7   73.34    5.94 
  -1   6  -8  103.18    7.09 
  -1   6  -8  108.80    8.40 
   1  -6  -8   90.45    6.98 
  -1  -6  -8  106.51    7.63 
   1   6  -8   91.85    7.12 
  -1   6  -9   70.12    4.82 
  -1   6  -9   61.39    4.98 
   1  -6  -9   60.20    2.97 
   1  -6  -9   73.36    5.21 
  -1   6  -9   68.36    3.92 
  -1  -6   9   64.35    2.03 
  -1  -6   9   63.52    2.13 
  -1  -6   9   65.75    2.46 
   1  -6  -9   66.06    2.49 
   1   6  -9   75.45    5.43 
   1   6  -9   59.78    3.21 
   1  -6   9   66.09    2.05 
  -1  -6  -9   62.11    4.68 
  -1  -6  -9   61.87    2.91 
  -1  -6  -9   65.82    2.73 
   1  -6   9   71.87    3.42 
  -1   6   9   66.08    2.67 
   1  -6   9   63.46    2.03 
  -1   6 -10   66.04    5.38 
   1  -6 -10   78.74    3.43 
   1  -6 -10   74.67    3.56 
   1  -6 -10   82.23    5.58 
  -1   6 -10   83.72    6.46 
  -1   6 -10   72.71    3.83 
  -1  -6  10   68.71    3.39 
  -1  -6  10   75.08    2.99 
   1  -6 -10   76.89    3.30 
   1   6 -10   70.23    3.63 
   1   6 -10   67.43    5.73 
   1  -6  10   73.82    3.22 
  -1  -6 -10   80.34    3.32 
  -1  -6 -10   73.35    3.28 
  -1  -6 -10   71.35    5.13 
   1  -6  10   75.99    3.22 
  -1   6  10   74.87    3.13 
   1  -6  10   77.94    3.04 
  -1   6 -11    4.78    3.46 
  -1   6 -11    9.08    1.80 
   1  -6 -11    7.96    1.35 
   1  -6 -11    7.46    2.48 
  -1   6 -11   12.02    3.49 
   1   6  11    5.51    1.77 
   1  -6 -11    6.80    1.22 
  -1  -6  11    5.86    1.28 
  -1  -6  11    4.92    1.39 
   1  -6 -11    9.10    1.81 
   1   6 -11   10.69    3.67 
  -1  -6 -11    5.18    2.30 
   1   6 -11    7.40    2.22 
  -1  -6 -11    7.77    1.17 
  -1  -6 -11    5.88    1.98 
   1  -6  11    4.52    1.12 
   1  -6  11    6.28    1.39 
   1  -6  11    6.12    1.20 
  -1   6  11    7.26    1.83 
  -1  -6 -11    8.07    1.55 
  -1   6 -12    3.79    4.22 
   1  -6 -12   13.34    1.80 
   1  -6 -12   12.16    2.76 
  -1   6 -12    7.24    3.84 
  -1   6 -12   16.91    2.71 
  -1  -6  12   11.68    1.48 
  -1  -6  12   13.47    1.25 
   1  -6 -12   12.21    1.62 
   1   6  12   11.90    1.91 
   1  -6 -12   13.49    1.72 
  -1  -6 -12    8.93    1.66 
  -1  -6 -12   10.22    1.65 
  -1  -6 -12   10.79    1.89 
   1   6 -12   13.51    3.78 
   1  -6  12   12.87    1.78 
  -1   6  12    9.78    1.86 
   1  -6  12    8.80    1.32 
   1   6  13    4.69    1.62 
  -1  -6  13    4.30    1.50 
  -1  -6  13    4.52    1.37 
  -1  -6  13    3.26    1.24 
   1  -6 -13    4.63    1.41 
   1  -6 -13    5.42    1.92 
   1  -6 -13    2.37    1.52 
  -1   6 -13    4.98    2.49 
  -1  -6 -13    4.54    2.12 
   1  -6  13    2.20    1.12 
  -1  -6 -13    3.39    1.50 
  -1  -6 -13    5.46    1.54 
   1   6 -13    6.29    3.04 
  -1   6  13    2.13    1.67 
   1  -6  13    3.54    1.96 
   1   6 -13    7.17    2.01 
  -1  -6  14   32.32    2.06 
  -1  -6  14   29.88    1.77 
  -1  -6  14   29.34    2.28 
   1  -6 -14   32.01    2.20 
   1  -6 -14   31.00    2.48 
   1   6  14   26.67    2.28 
   1  -6 -14   34.14    2.28 
  -1   6 -14   31.57    2.64 
   1  -6  14   29.41    1.89 
  -1  -6 -14   29.04    2.15 
  -1  -6 -14   30.18    2.45 
  -1  -6 -14   32.19    2.11 
  -1   6  14   34.05    2.33 
   1  -6  14   32.51    2.01 
   1   6 -14   27.78    2.84 
  -1  -6 -14   36.37    3.06 
   1  -6 -15   31.38    2.39 
  -1  -6  15   29.20    1.85 
   1  -6 -15   29.15    2.52 
   1   6  15   26.82    2.35 
  -1  -6  15   26.37    2.18 
  -1   6 -15   27.10    2.88 
   1  -6  15   26.41    2.21 
   1  -6  15   24.36    1.55 
  -1  -6 -15   26.53    2.37 
  -1  -6 -15   23.03    1.95 
  -1   6  15   26.34    2.20 
  -1  -6 -15   24.96    2.38 
   1   6 -15   22.06    2.93 
  -1  -6 -15   20.32    2.36 
   1  -6 -16   11.87    2.16 
  -1  -6  16   16.47    1.49 
   1   6  16   15.87    2.25 
  -1   6 -16   15.59    2.76 
  -1  -6  16   14.07    1.98 
   1  -6 -16   15.24    2.28 
   1  -6 -16   11.53    2.48 
   1  -6  16   11.64    1.49 
  -1  -6 -16   16.52    2.17 
  -1  -6 -16   12.51    2.01 
  -1   6  16   12.61    2.11 
   1   6 -16   12.28    2.85 
  -1  -6 -16   17.06    2.85 
   1  -6  16   17.35    1.99 
   1  -6 -17    7.48    2.05 
  -1  -6  17    7.82    1.04 
   1   6  17    5.47    1.74 
  -1   6 -17    0.33    2.60 
  -1  -6  17    7.73    1.66 
   1  -6 -17    6.78    2.08 
   1  -6  17    8.96    1.27 
  -1  -6 -17    3.72    2.07 
  -1  -6 -17    9.36    3.25 
  -1   6  17    9.98    2.01 
   1  -6  17    9.05    1.37 
   1   6 -17   10.07    2.63 
  -1  -6 -17    3.24    2.53 
   1  -6 -18    7.57    1.97 
  -1  -6  18    7.45    1.67 
   1   6  18    5.15    2.36 
  -1   6 -18    7.24    2.34 
  -1  -6  18    7.46    1.80 
   1  -6 -18    7.44    2.32 
   1  -6  18    6.93    1.44 
  -1  -6 -18    5.17    2.02 
  -1  -6 -18    4.06    2.31 
  -1   6  18    5.67    1.70 
   1  -6  18   10.26    1.80 
   1   6 -18   10.94    2.42 
   1  -6 -19    3.98    2.08 
  -1  -6  19    2.43    1.30 
   1  -6 -19    3.72    2.19 
  -1  -6  19    2.63    1.63 
  -1   6 -19    3.16    2.31 
   1  -6  19    4.65    1.67 
   1  -6  19    4.59    1.70 
  -1   6  19    5.57    2.11 
  -1  -6 -19    3.31    2.20 
   1   6 -19    2.69    2.47 
  -1  -6  20    4.44    2.16 
  -1   6 -20    5.50    2.58 
   1  -6 -20    3.37    2.49 
   1  -6  20    6.62    1.76 
   1   6 -20    4.89    3.06 
  -1  -6 -20    2.24    2.30 
  -1  -7   0  126.79    5.91 
   1  -7   0  138.04    6.28 
  -1   7   0  118.03    5.84 
   1  -7  -1   34.07    3.58 
  -1  -7   1   32.66    3.58 
  -1   7  -1   31.01    3.76 
  -1  -7  -1   35.04    3.53 
   1  -7   1   39.84    3.59 
  -1   7   1   32.59    4.63 
   1   7  -1   33.67    4.06 
   1  -7  -2   42.44    3.72 
  -1  -7   2   57.53    4.06 
  -1   7  -2   42.20    4.62 
  -1  -7  -2   41.74    3.77 
   1  -7   2   42.18    3.93 
  -1   7   2   47.45    4.06 
   1   7  -2   43.05    4.12 
   1  -7  -3   49.89    3.83 
  -1  -7   3   51.52    4.09 
  -1   7  -3   53.20    4.54 
  -1  -7  -3   49.15    3.72 
   1  -7   3   55.54    4.66 
  -1   7   3   52.95    4.32 
   1   7  -3   50.17    4.24 
  -1  -7   4   32.73    3.74 
   1  -7  -4   45.05    3.98 
  -1   7  -4   32.81    4.17 
  -1  -7  -4   43.08    3.58 
  -1   7   4   37.96    3.86 
   1  -7   4   41.37    4.17 
   1   7  -4   38.31    4.55 
  -1  -7   5   53.53    3.98 
   1  -7  -5   69.54    5.84 
  -1   7  -5   63.79    6.17 
   1  -7   5   60.31    5.09 
  -1  -7  -5   56.59    4.05 
   1   7  -5   57.13    5.06 
  -1   7  -6   40.10    4.83 
   1  -7  -6   48.37    4.04 
   1   7  -6   38.55    3.85 
   1  -7   6   38.03    4.35 
  -1  -7  -6   41.76    3.70 
   1   7  -6   35.32    4.59 
  -1   7  -7   65.05    5.80 
  -1  -7   7   53.84    2.10 
   1  -7  -7   64.89    5.95 
  -1   7  -7   71.74    6.00 
  -1  -7  -7   66.99    5.59 
   1   7  -7   77.89    7.37 
   1  -7   7   59.26    2.45 
   1   7  -7   67.04    5.28 
   1  -7   7   63.08    3.74 
  -1  -7  -7   58.78    2.64 
  -1   7  -8   37.58    3.89 
   1  -7  -8   37.33    2.29 
  -1   7  -8   37.11    2.68 
   1  -7  -8   35.54    3.66 
  -1   7  -8   32.95    4.76 
   1  -7  -8   32.02    2.20 
  -1  -7   8   32.42    1.97 
  -1  -7   8   34.44    1.97 
   1  -7   8   30.35    2.06 
   1  -7   8   34.90    1.93 
   1   7  -8   30.23    4.00 
   1   7  -8   34.68    5.10 
  -1  -7  -8   36.16    2.28 
  -1   7   8   32.79    2.18 
  -1  -7  -8   38.09    4.01 
  -1   7  -9   -1.30    2.75 
   1  -7  -9    0.15    1.05 
   1  -7  -9   -0.30    1.67 
   1  -7  -9    1.00    2.43 
  -1   7  -9    4.07    3.92 
  -1  -7   9    1.70    1.11 
  -1  -7   9    2.80    1.01 
  -1   7  -9    0.05    1.47 
  -1  -7   9   -0.45    1.39 
   1  -7  -9   -0.84    1.54 
   1  -7   9    0.64    1.00 
   1   7  -9    0.48    3.20 
   1   7  -9    6.35    3.98 
  -1  -7  -9   -1.00    1.79 
  -1  -7  -9    0.02    2.19 
  -1   7   9    0.12    1.20 
   1  -7   9    2.26    1.36 
   1   7  -9    1.64    2.13 
  -1   7 -10    3.69    3.10 
   1  -7 -10    1.07    1.41 
   1  -7 -10    1.34    2.81 
  -1   7 -10   -1.25    3.30 
  -1   7 -10   -1.69    2.21 
  -1  -7  10    0.35    0.86 
  -1  -7  10    1.14    1.20 
  -1  -7  10    0.19    1.58 
   1  -7 -10    1.13    1.46 
   1  -7 -10   -0.90    1.97 
   1   7 -10   -1.81    4.03 
   1   7 -10    2.94    2.95 
   1  -7  10    0.15    1.28 
   1  -7  10    0.80    1.58 
  -1  -7 -10    2.29    1.11 
  -1  -7 -10    0.03    1.22 
  -1   7  10    1.72    1.72 
   1  -7  10    0.90    1.16 
   1   7 -10    1.76    2.67 
  -1   7 -11    1.70    2.38 
   1  -7 -11    4.17    1.46 
   1  -7 -11    6.32    3.33 
  -1   7 -11    1.49    3.85 
  -1   7 -11    5.83    2.86 
   1  -7 -11    4.76    1.05 
  -1  -7  11    2.19    1.00 
  -1  -7  11    6.11    1.09 
   1  -7 -11    4.65    1.74 
  -1  -7  11    4.76    1.73 
   1   7 -11    3.80    2.68 
   1  -7  11    5.18    1.28 
  -1  -7 -11    1.55    1.66 
  -1  -7 -11    2.43    2.09 
   1  -7  11    3.06    1.42 
  -1   7  11    0.92    1.50 
   1   7 -11    0.64    4.78 
   1   7 -11    4.51    2.86 
  -1   7 -12    2.66    4.18 
   1  -7 -12    2.03    1.37 
   1  -7 -12   -0.59    3.81 
  -1   7 -12    0.93    4.83 
   1  -7 -12    0.82    1.77 
  -1  -7  12    2.00    1.41 
   1  -7 -12    4.21    1.77 
  -1  -7  12    1.90    1.08 
  -1   7 -12    5.06    2.32 
   1  -7  12    5.18    1.65 
   1  -7  12    1.29    1.39 
   1   7 -12    0.11    3.87 
  -1  -7 -12    2.21    1.60 
   1   7 -12    4.80    4.01 
  -1   7  12    1.45    1.67 
  -1  -7 -12    2.87    1.98 
   1   7 -12   -0.65    2.40 
  -1   7 -13   16.14    2.93 
  -1  -7  13   12.74    1.76 
   1  -7 -13    9.59    1.86 
   1  -7 -13    9.50    1.71 
   1   7  13   11.89    1.98 
  -1  -7  13    9.96    1.53 
   1  -7 -13   11.00    1.63 
  -1  -7 -13   13.85    2.00 
  -1  -7 -13   10.70    2.01 
   1  -7  13   10.82    1.91 
  -1  -7 -13   10.68    1.34 
  -1   7  13   10.41    1.41 
   1  -7  13    6.60    1.48 
   1   7 -13   10.24    1.99 
  -1  -7  14   22.20    1.87 
  -1  -7  14   19.85    1.63 
  -1  -7  14   21.90    2.00 
   1  -7 -14   18.68    1.79 
   1  -7 -14   17.17    2.11 
   1   7  14   24.08    2.28 
   1  -7 -14   21.28    1.89 
  -1   7 -14   20.05    2.76 
   1  -7  14   19.76    1.63 
  -1  -7 -14   20.32    2.45 
  -1  -7 -14   18.46    2.04 
  -1  -7 -14   15.61    1.95 
  -1   7  14   16.82    1.88 
   1  -7  14   18.28    1.84 
   1   7 -14   21.97    3.03 
  -1  -7 -14   23.68    2.19 
   1  -7 -15    8.80    2.29 
   1  -7 -15    7.50    1.86 
  -1  -7  15    5.92    1.80 
   1   7  15    5.14    2.09 
  -1   7 -15    5.63    2.50 
   1  -7  15    8.71    1.10 
   1  -7  15    6.95    1.66 
  -1  -7 -15    5.34    2.01 
  -1  -7 -15    5.10    1.47 
  -1   7  15    7.06    1.82 
  -1  -7 -15    4.76    2.18 
   1   7 -15    8.17    2.84 
  -1  -7 -15    7.76    2.38 
   1  -7 -16   28.02    2.84 
  -1  -7  16   29.19    2.10 
   1  -7 -16   24.65    2.43 
  -1   7 -16   29.61    2.52 
  -1  -7  16   32.65    2.43 
   1  -7 -16   32.18    2.53 
   1   7  16   28.16    2.58 
  -1  -7 -16   26.02    2.70 
  -1   7  16   29.66    2.54 
   1  -7  16   31.40    2.26 
   1   7 -16   33.08    3.18 
  -1  -7 -16   35.94    3.03 
   1  -7  16   31.04    1.73 
   1  -7 -17    4.67    1.76 
  -1  -7  17    3.39    1.33 
   1  -7 -17    8.93    2.60 
  -1  -7  17    8.53    1.78 
   1  -7 -17    3.91    2.59 
  -1   7 -17    5.43    2.02 
   1  -7  17    4.56    1.72 
   1  -7  17    5.43    1.28 
  -1   7  17    6.30    1.90 
   1   7 -17    1.33    2.40 
  -1  -7 -17    7.54    2.36 
  -1  -7 -17    4.35    2.13 
   1  -7 -18    3.96    2.32 
  -1  -7  18    6.29    1.37 
   1  -7 -18    6.57    2.81 
  -1  -7  18    6.80    1.75 
  -1   7 -18    6.15    2.05 
   1  -7  18    6.27    1.90 
   1  -7  18    7.35    1.41 
  -1   7  18    7.04    1.85 
  -1  -7 -18    6.90    2.08 
   1   7 -18    7.71    2.92 
  -1  -7 -18    6.45    2.29 
   1  -7 -19    2.04    2.25 
  -1  -7  19    2.37    1.36 
   1  -7 -19    1.99    2.35 
  -1  -7  19    4.49    1.73 
  -1   7 -19    3.75    2.72 
   1  -7  19    2.75    1.78 
  -1  -7 -19    2.21    2.21 
  -1   7  19    2.56    2.39 
   1   7 -19    4.26    2.40 
   1  -7  19    2.82    1.80 
  -1  -8   0    8.44    2.71 
   1  -8   0   10.02    3.03 
  -1   8   0    8.28    2.77 
   1  -8  -1  388.70   16.17 
  -1  -8   1  321.47   13.59 
  -1   8  -1  319.59   14.38 
  -1  -8  -1  402.51   16.36 
   1  -8   1  400.82   16.08 
  -1   8   1  351.79   15.23 
   1  -8  -2  188.63    9.04 
  -1  -8   2  169.19    8.74 
  -1   8  -2  187.95    9.46 
  -1  -8  -2  190.17    9.10 
   1  -8   2  162.66    8.07 
   1  -8  -3    9.51    2.77 
  -1  -8   3   13.11    3.16 
  -1   8  -3   11.39    3.32 
  -1  -8  -3   10.91    2.59 
   1  -8   3    9.53    3.13 
  -1  -8   4   27.78    3.63 
   1  -8  -4   23.49    2.82 
  -1   8  -4   24.43    3.70 
   1  -8   4   35.01    3.85 
  -1  -8  -4   28.81    3.22 
   1   8  -4   22.10    3.88 
  -1  -8   5   26.45    3.53 
   1  -8  -5   26.93    3.50 
  -1   8  -5   28.30    4.81 
   1  -8   5   24.44    3.56 
  -1  -8  -5   29.50    3.46 
   1   8  -5   34.27    4.35 
   1  -8  -6   33.45    3.72 
   1  -8  -6   33.56    2.15 
  -1  -8   6   39.42    4.27 
  -1   8  -6   36.75    4.84 
  -1  -8   6   37.89    2.06 
  -1  -8   6   32.13    1.81 
  -1   8  -6   32.51    2.58 
   1  -8   6   36.24    4.53 
   1  -8   6   30.99    1.77 
   1  -8   6   27.54    1.90 
   1  -8   6   36.24    1.98 
   1   8  -6   37.87    4.79 
  -1  -8  -6   32.65    2.23 
   1  -8  -7   22.15    3.31 
  -1   8  -7   18.14    1.87 
  -1  -8   7   19.13    3.53 
  -1   8  -7   15.26    3.43 
   1  -8  -7   19.37    2.02 
  -1  -8   7   19.38    1.40 
   1  -8  -7   19.38    1.72 
  -1  -8   7   15.45    1.49 
   1  -8   7   16.29    1.46 
   1  -8   7   16.93    1.45 
   1   8  -7   25.45    4.22 
  -1  -8  -7   14.08    2.08 
  -1   8   7   17.19    1.62 
   1  -8   7   21.48    3.12 
   1  -8  -8   80.71    5.73 
  -1   8  -8   78.21    3.69 
  -1  -8   8   78.06    5.53 
  -1   8  -8   93.76    6.77 
   1  -8  -8   74.33    3.43 
  -1  -8   8   75.37    3.19 
   1  -8  -8   74.20    3.30 
   1  -8   8   75.35    2.98 
   1  -8   8   79.05    3.21 
   1  -8   8   72.32    3.29 
   1   8  -8   77.91    5.78 
  -1  -8  -8   84.77    3.85 
  -1   8   8   69.98    3.22 
   1  -8   8   91.19    5.43 
   1  -8  -9   -0.66    2.63 
  -1   8  -9   -1.03    2.43 
  -1   8  -9   -1.01    2.72 
  -1  -8   9    2.19    1.33 
  -1  -8   9    2.22    1.19 
   1  -8  -9    2.69    1.36 
  -1  -8   9    0.04    1.10 
   1  -8  -9    0.45    1.48 
   1  -8   9    3.86    1.60 
   1  -8   9    2.35    1.22 
   1   8  -9   -1.07    4.88 
  -1  -8  -9    3.24    1.71 
  -1   8   9    1.50    1.50 
   1  -8   9    2.04    3.57 
   1   8  -9    1.81    1.57 
   1  -8 -10   29.36    2.27 
   1  -8 -10   23.26    4.50 
  -1  -8  10   25.55    2.04 
  -1   8 -10   22.42    4.83 
   1  -8 -10   27.21    2.28 
  -1  -8  10   25.63    1.87 
  -1  -8  10   27.80    1.98 
  -1   8 -10   22.63    2.24 
   1  -8  10   27.43    3.99 
   1   8 -10   31.18    3.78 
   1   8 -10   25.22    4.67 
  -1  -8 -10   25.41    1.82 
  -1   8  10   24.80    1.98 
   1  -8  10   27.62    1.88 
   1   8 -10   31.43    2.86 
   1  -8 -11   -1.33    3.02 
  -1  -8  11    1.09    1.48 
  -1   8 -11   -0.56    3.58 
   1  -8 -11    1.41    1.04 
  -1  -8  11   -0.69    1.16 
   1  -8 -11    0.17    1.20 
   1  -8 -11    0.27    1.90 
  -1  -8  11    2.84    1.51 
  -1   8 -11    3.25    2.08 
   1  -8  11    1.74    4.28 
   1   8 -11   -1.43    4.77 
  -1  -8 -11    2.63    1.69 
   1  -8  11    1.15    1.70 
  -1   8  11    1.79    1.45 
  -1  -8 -11    0.29    2.06 
   1   8 -11    0.81    2.27 
   1  -8 -12   31.42    2.19 
  -1  -8  12   28.27    1.77 
   1  -8 -12   30.04    2.40 
   1  -8 -12   28.81    2.46 
  -1  -8  12   28.24    2.25 
  -1  -8  12   35.69    2.30 
  -1   8 -12   29.73    2.68 
   1  -8  12   30.84    1.92 
  -1  -8 -12   29.50    2.01 
   1  -8  12   31.32    2.17 
  -1   8  12   29.79    2.35 
  -1  -8 -12   27.01    2.35 
   1   8 -12   33.49    3.38 
  -1  -8  13   16.99    1.77 
   1  -8 -13   16.49    2.27 
   1  -8 -13   21.29    2.11 
  -1  -8  13   16.88    1.86 
   1  -8 -13   16.54    1.76 
  -1   8 -13   19.49    2.60 
   1  -8  13   19.25    1.53 
  -1  -8 -13   19.17    1.83 
   1  -8  13   14.52    1.76 
  -1   8  13   20.13    1.88 
  -1  -8 -13   18.38    2.22 
   1   8 -13   14.42    2.62 
  -1  -8  14   18.45    2.16 
   1  -8 -14   18.45    2.07 
  -1   8 -14   17.80    2.30 
   1  -8 -14   16.54    1.91 
   1  -8 -14   21.44    2.31 
   1  -8  14   21.10    1.76 
  -1  -8 -14   16.67    1.83 
   1  -8  14   20.04    1.78 
  -1   8  14   22.14    2.10 
  -1  -8 -14   13.93    2.22 
   1   8 -14   20.06    2.77 
  -1  -8 -14   14.27    2.61 
  -1   8 -15    9.18    2.33 
  -1  -8  15    6.81    1.37 
   1  -8 -15    7.58    2.04 
  -1  -8  15   11.56    1.78 
   1  -8 -15    7.81    2.20 
   1  -8  15    7.81    1.41 
  -1  -8 -15    9.95    1.72 
  -1  -8 -15    7.75    2.41 
  -1   8  15    9.71    1.85 
   1  -8  15    8.62    1.67 
   1   8 -15    7.48    2.32 
  -1  -8 -15    4.21    2.38 
   1  -8 -16    1.14    2.19 
  -1  -8  16   -2.09    1.17 
   1  -8 -16    0.72    2.08 
  -1  -8  16    0.91    1.66 
   1  -8 -16   -1.96    2.53 
  -1   8 -16   -0.58    2.43 
   1  -8  16    0.06    1.64 
   1  -8  16    2.81    1.43 
  -1   8  16   -1.15    2.01 
   1   8 -16    2.07    2.17 
  -1  -8 -16    1.13    2.32 
  -1  -8 -16   -2.33    1.99 
   1  -8 -17   18.07    2.50 
  -1  -8  17   21.59    1.55 
   1  -8 -17   20.04    2.54 
  -1  -8  17   18.80    2.08 
   1  -8 -17   18.13    2.74 
  -1   8 -17   15.65    2.47 
   1  -8  17   16.77    2.00 
  -1   8  17   18.94    2.29 
   1   8 -17   17.02    2.87 
   1  -8  17   21.05    1.66 
  -1  -8 -17   16.73    2.39 
  -1  -8 -17   16.48    2.53 
   1  -8 -18    3.36    2.51 
  -1  -8  18    2.49    1.25 
   1  -8 -18    0.16    2.91 
  -1  -8  18    2.12    1.91 
  -1   8 -18    0.94    2.36 
   1  -8  18    3.02    1.59 
   1  -8  18    2.54    1.24 
  -1   8  18    1.95    2.18 
  -1  -8 -18    3.02    2.42 
   1   8 -18    1.25    3.03 
  -1  -8 -18    3.18    2.27 
  -1  -8  19    0.57    1.95 
  -1   8 -19    0.65    2.46 
   1  -8  19   -1.50    2.17 
   1  -9   0   12.34    2.54 
  -1  -9   0    9.84    1.37 
   1  -9  -1  125.31    6.88 
  -1  -9   1  122.25    5.31 
   1  -9   1  132.48    7.05 
  -1  -9  -1  112.37    6.44 
   1  -9  -2  124.67    6.87 
   1  -9   2  124.35    6.97 
  -1  -9  -2  133.69    5.82 
   1  -9  -3   40.43    3.42 
  -1   9  -3   40.72    4.12 
   1  -9  -3   38.59    2.08 
   1  -9   3   36.22    4.11 
   1  -9   3   33.31    1.80 
  -1  -9  -3   38.07    2.29 
   1  -9  -4   10.72    3.05 
   1  -9  -4    9.31    1.66 
  -1   9  -4    8.56    3.46 
  -1   9  -4   12.01    2.17 
  -1  -9   4    8.20    0.98 
  -1  -9   4   10.84    1.26 
   1  -9   4   10.45    1.78 
   1  -9   4   10.05    3.36 
  -1  -9  -4    8.81    1.73 
   1  -9   4    8.71    1.34 
   1  -9  -5  109.87    7.10 
  -1  -9   5   99.21    4.23 
  -1   9  -5   82.82    6.32 
  -1  -9   5   92.53    3.91 
   1  -9  -5   84.81    4.00 
   1  -9  -5   87.51    4.00 
  -1   9  -5   91.86    4.63 
   1  -9   5   92.77    4.13 
   1  -9   5   99.03    4.30 
   1  -9   5  101.48    6.32 
  -1  -9  -5   94.76    4.36 
  -1   9   5   90.90    4.53 
   1  -9  -6   95.50    6.08 
  -1  -9   6  106.73    3.96 
  -1   9  -6   99.58    7.16 
  -1  -9   6   98.75    3.93 
   1  -9  -6  104.31    4.12 
   1  -9  -6  101.43    4.13 
  -1   9  -6  109.46    4.77 
   1  -9   6   94.79    3.69 
   1  -9   6  106.06    4.30 
   1  -9   6  101.33    6.27 
  -1  -9  -6  100.83    3.91 
  -1   9   6  103.86    4.12 
   1  -9  -7   35.09    3.45 
  -1  -9   7   35.35    1.65 
  -1   9  -7   34.73    4.90 
  -1  -9   7   33.55    1.73 
   1  -9  -7   31.85    1.88 
   1  -9  -7   34.84    2.18 
  -1   9  -7   37.33    2.27 
   1  -9   7   36.16    1.69 
   1  -9   7   38.48    2.40 
   1  -9   7   37.27    4.19 
  -1  -9  -7   34.56    2.18 
  -1   9   7   37.88    2.46 
   1  -9  -8   82.17    5.11 
  -1  -9   8   76.76    2.92 
  -1   9  -8   77.02    6.29 
  -1  -9   8   79.42    2.98 
   1  -9  -8   78.02    3.21 
   1  -9  -8   82.11    3.49 
  -1   9  -8   73.31    3.38 
   1  -9   8   82.14    2.98 
   1  -9   8   82.17    3.22 
   1  -9   8   67.77    5.17 
  -1  -9  -8   83.89    3.31 
  -1   9   8   76.88    3.06 
   1  -9  -9    2.58    3.56 
   1  -9  -9    2.18    1.54 
  -1   9  -9   -1.91    4.05 
  -1  -9   9    2.93    1.37 
   1  -9  -9   -0.01    1.41 
  -1   9  -9    0.02    2.02 
   1  -9   9    0.58    1.35 
   1  -9   9    1.19    1.43 
  -1  -9  -9    4.89    1.76 
  -1   9   9    1.88    1.64 
   1  -9   9    3.14    4.08 
  -1  -9  10    1.90    1.72 
  -1   9 -10    4.24    4.11 
  -1  -9  10    1.46    1.26 
   1  -9 -10    0.49    1.39 
   1  -9 -10    2.27    1.05 
  -1   9 -10    4.06    2.30 
   1  -9  10    0.88    1.25 
   1  -9  10    2.05    1.75 
   1  -9  10    3.19    3.85 
  -1  -9 -10    0.58    1.56 
  -1   9  10    0.86    1.32 
   1   9 -10    1.15    2.14 
  -1  -9  11   12.61    1.35 
   1  -9 -11   13.81    1.89 
  -1   9 -11    8.05    2.46 
  -1  -9  11   12.47    1.60 
  -1  -9  11   10.30    1.73 
   1  -9 -11   11.30    1.77 
  -1  -9 -11   13.22    1.73 
  -1   9  11   12.92    2.09 
   1  -9  11   11.44    1.78 
   1   9 -11    7.28    1.99 
  -1  -9  12   50.42    2.55 
   1  -9 -12   57.88    3.17 
  -1   9 -12   46.26    3.50 
  -1  -9  12   53.97    3.21 
  -1  -9  12   55.62    2.63 
   1  -9 -12   56.70    2.93 
  -1  -9 -12   59.90    3.01 
  -1   9  12   55.20    2.92 
   1  -9  12   56.42    3.01 
   1   9 -12   45.28    3.38 
  -1  -9  13    1.20    1.61 
  -1  -9  13    0.40    1.24 
   1  -9 -13   -0.40    1.69 
  -1   9 -13   -0.10    2.82 
   1  -9 -13   -0.02    1.44 
   1  -9 -13    0.05    2.02 
   1  -9  13    2.57    1.33 
  -1  -9 -13    2.22    1.48 
  -1   9  13    0.38    1.71 
   1   9 -13    0.87    2.36 
   1  -9  13   -0.31    1.89 
  -1  -9  14   25.03    2.26 
   1  -9 -14   24.63    2.17 
  -1   9 -14   28.63    2.63 
   1  -9 -14   23.52    1.85 
   1  -9 -14   25.79    2.69 
   1  -9  14   27.12    2.49 
  -1  -9 -14   28.41    2.12 
   1  -9  14   27.55    1.98 
  -1   9  14   28.28    2.46 
  -1  -9 -14   24.37    2.70 
   1   9 -14   24.57    2.90 
  -1  -9 -14   24.29    2.89 
   1  -9 -15   18.27    2.31 
   1  -9 -15   16.24    2.34 
  -1   9 -15   14.05    2.51 
  -1  -9  15   16.40    2.01 
  -1  -9 -15   18.87    1.90 
  -1  -9 -15   14.15    2.76 
   1  -9  15   17.88    1.48 
  -1   9  15   17.78    2.08 
   1  -9  15   20.55    2.20 
   1   9 -15   15.38    2.98 
  -1  -9 -15   15.72    2.49 
  -1  -9  16    7.95    1.96 
   1  -9 -16    7.44    2.22 
  -1   9 -16    7.57    2.57 
   1  -9 -16    5.92    2.31 
   1  -9 -16    7.00    2.38 
   1  -9  16    8.72    1.50 
  -1   9  16    7.85    2.24 
   1   9 -16    8.52    2.66 
   1  -9  16    7.23    1.83 
  -1  -9 -16    7.30    2.08 
  -1  -9 -16    5.95    2.71 
   1  -9 -17   -0.23    2.81 
  -1  -9  17    1.00    1.30 
  -1   9 -17   -1.89    2.03 
   1  -9  17    0.00    1.67 
   1   9 -17    0.51    2.64 
  -1  -9 -17    2.15    2.24 
   1  -9  17    0.06    1.32 
  -1  -9  18    7.21    1.45 
  -1   9 -18    6.26    2.42 
   1  -9  18    7.16    2.11 
   1 -10   0   56.62    4.10 
   1 -10   0   43.09    2.64 
  -1 -10   0   46.33    2.79 
   1 -10  -1   46.63    4.04 
   1 -10  -1   43.96    2.72 
  -1 -10   1   44.23    2.78 
   1 -10   1   40.95    4.07 
   1 -10   1   37.99    2.61 
   1 -10  -2  197.12    9.15 
  -1  10  -2  173.99    6.39 
  -1 -10   2  158.22    5.56 
   1 -10  -2  167.53    5.82 
  -1 -10   2  177.07    6.39 
   1 -10   2  189.91    8.54 
  -1 -10  -2  180.60    6.31 
   1 -10   2  155.13    5.82 
   1 -10   2  167.57    5.92 
   1 -10  -3   43.39    4.27 
  -1  10  -3   48.17    2.86 
   1 -10  -3   39.76    2.22 
  -1 -10   3   39.78    1.63 
   1 -10   3   40.91    1.83 
  -1 -10  -3   43.51    2.67 
   1 -10   3   38.33    1.91 
   1 -10   3   51.80    4.19 
  -1  10   3   40.67    2.73 
   1 -10  -4   58.22    5.15 
  -1  10  -4   73.54    3.40 
  -1 -10   4   70.80    3.08 
  -1 -10   4   71.60    3.04 
   1 -10  -4   72.57    3.39 
   1 -10   4   70.75    4.94 
   1 -10   4   71.68    3.16 
  -1 -10  -4   75.20    3.68 
   1 -10   4   69.27    3.06 
   1 -10  -5   18.04    2.64 
   1 -10  -5   18.66    1.76 
  -1  10  -5   15.15    2.28 
  -1 -10   5   15.01    1.39 
  -1 -10   5   16.14    1.45 
   1 -10   5   19.38    1.88 
  -1 -10  -5   14.51    1.92 
   1 -10   5   25.28    3.86 
   1 -10   5   14.39    1.43 
   1 -10  -6    6.24    1.90 
   1 -10  -6    7.45    1.75 
  -1 -10   6    6.56    1.37 
  -1  10  -6   10.00    2.35 
  -1 -10   6    6.15    1.42 
   1 -10   6    8.22    1.60 
   1 -10   6    8.15    3.41 
   1 -10   6    7.09    1.43 
  -1  10   6    7.58    1.39 
  -1 -10  -6    9.59    1.88 
   1 -10  -7   59.21    3.22 
  -1 -10   7   52.85    2.40 
   1 -10  -7   50.80    2.69 
  -1 -10   7   54.29    2.47 
  -1  10  -7   50.31    2.76 
   1 -10   7   53.63    2.43 
   1 -10   7   53.19    2.80 
  -1 -10  -7   59.21    3.07 
  -1  10   7   53.76    3.16 
   1 -10   7   44.10    4.64 
  -1 -10   8   67.69    3.05 
  -1 -10   8   68.82    2.88 
   1 -10  -8   64.51    3.08 
  -1  10  -8   68.76    3.45 
   1 -10   8   68.49    5.39 
   1 -10   8   67.23    3.03 
   1 -10   8   72.90    3.14 
  -1 -10  -8   73.38    3.56 
  -1  10   8   64.47    3.32 
  -1 -10   9    3.29    1.32 
   1 -10  -9    0.33    1.55 
  -1 -10   9   -1.08    1.08 
   1 -10  -9    2.58    1.53 
  -1  10  -9   -0.17    2.40 
   1 -10   9   -0.01    1.23 
   1 -10   9    1.11    1.63 
  -1 -10  -9    4.05    1.91 
  -1  10   9    1.27    1.70 
  -1 -10  10   32.32    1.92 
   1 -10 -10   31.55    2.44 
   1 -10 -10   27.42    2.30 
  -1  10 -10   28.41    2.72 
   1 -10  10   33.38    2.03 
   1 -10  10   31.06    2.29 
  -1 -10 -10   33.85    2.35 
  -1  10  10   26.25    2.19 
  -1 -10  11   34.90    1.91 
   1 -10 -11   38.83    2.72 
   1 -10 -11   33.18    2.33 
  -1  10 -11   35.78    3.56 
   1 -10  11   38.43    2.13 
   1 -10  11   45.00    2.80 
  -1 -10 -11   32.94    2.38 
  -1  10  11   40.20    2.81 
  -1 -10  12   59.76    2.93 
   1 -10 -12   57.92    3.47 
   1 -10 -12   59.32    3.25 
  -1  10 -12   54.11    3.68 
   1 -10  12   57.07    3.24 
  -1  10  12   57.48    3.45 
   1  10 -12   48.93    3.61 
  -1 -10 -12   57.67    3.10 
  -1 -10  13    8.99    1.42 
   1 -10 -13    7.79    2.01 
  -1 -10  13    5.55    1.98 
   1 -10 -13    7.32    1.56 
  -1  10 -13    9.08    2.57 
   1 -10  13    7.16    1.78 
  -1 -10 -13    2.46    1.50 
  -1  10  13    8.84    1.94 
   1  10 -13    3.88    2.73 
  -1 -10  14   14.56    1.47 
   1 -10 -14   17.80    2.67 
   1 -10 -14   19.31    2.05 
  -1  10 -14   18.06    2.63 
   1 -10  14   19.78    2.09 
  -1  10  14   15.20    2.21 
   1  10 -14   10.64    2.49 
  -1 -10 -14   15.74    1.64 
  -1 -10 -14   15.62    2.47 
   1 -10 -15   -2.49    2.19 
  -1 -10  15    1.45    1.21 
  -1  10 -15   -0.18    2.18 
   1 -10  15    1.30    1.72 
  -1 -10 -15   -0.02    1.46 
  -1 -10 -15    1.12    2.19 
   1 -10  15    0.63    1.05 
   1 -10 -16    9.47    2.55 
  -1  10 -16    6.24    2.67 
   1 -10  16   11.30    1.41 
  -1 -10 -16   11.51    2.28 
   1 -10  16   10.85    1.84 
   1 -10 -17    0.90    2.30 
  -1  10 -17    0.03    2.84 
  -1 -10 -17    1.41    2.04 
   1 -10  17    4.16    2.02 
   1 -11   0  523.65   14.87 
  -1 -11   0  561.94    7.18 
   1 -11  -1  156.77    5.57 
  -1 -11   1  166.20    5.67 
  -1 -11  -1  157.06    5.47 
   1 -11   1  155.80    5.48 
   1 -11  -2   61.05    3.13 
  -1 -11   2   60.74    3.01 
  -1 -11  -2   57.69    3.01 
   1 -11   2   56.99    3.12 
  -1 -11   3   87.00    3.81 
   1 -11  -3   81.90    3.54 
  -1  11  -3   90.61    4.15 
   1 -11   3   80.53    3.31 
   1 -11   3   82.46    3.66 
  -1 -11  -3   92.22    3.51 
  -1  11   3   79.79    4.06 
   1 -11  -4   24.62    2.18 
  -1 -11   4   18.94    1.63 
  -1  11  -4   18.00    2.06 
   1 -11   4   20.53    1.40 
  -1 -11  -4   23.98    1.64 
   1 -11   4   18.66    1.85 
  -1  11  -5  188.08    6.87 
  -1 -11   5  177.09    6.00 
   1 -11  -5  177.30    6.12 
  -1 -11   5  169.37    5.87 
  -1 -11  -5  177.68    6.20 
   1 -11   5  169.74    6.19 
   1 -11   5  177.73    5.98 
  -1  11  -6   49.29    3.09 
  -1 -11   6   42.87    2.22 
  -1 -11   6   44.80    2.32 
   1 -11  -6   38.27    2.60 
   1 -11   6   44.36    2.55 
  -1 -11  -6   42.92    2.45 
   1 -11   6   45.46    2.55 
  -1  11  -7  114.76    5.52 
  -1 -11   7  110.84    4.53 
  -1 -11   7  103.00    4.36 
   1 -11  -7  117.40    5.01 
   1 -11   7  108.65    4.60 
  -1 -11  -7  110.74    4.69 
   1 -11   7  116.45    4.78 
  -1  11  -8    6.87    2.17 
  -1 -11   8    4.80    1.35 
  -1 -11   8    6.45    1.45 
   1 -11  -8    9.00    1.97 
   1 -11   8    7.40    1.60 
  -1 -11  -8    5.51    1.46 
   1 -11   8    9.08    1.31 
   1 -11  -9   16.54    1.86 
  -1 -11   9   16.16    1.48 
  -1  11  -9   21.09    2.30 
   1 -11   9   20.08    1.59 
  -1 -11  -9   19.98    2.09 
   1 -11   9   17.50    1.84 
   1 -11 -10    2.39    1.60 
  -1 -11  10    6.22    1.37 
  -1  11 -10    4.47    2.28 
   1 -11  10    4.53    1.38 
  -1 -11 -10    4.14    1.62 
   1 -11  10    2.46    1.87 
   1 -11 -11    9.77    1.68 
  -1 -11  11    9.16    1.62 
  -1  11 -11    8.96    2.73 
   1 -11  11    7.59    1.36 
  -1 -11 -11   11.06    1.45 
   1 -11  11   11.75    1.98 
   1 -11 -12   36.52    2.32 
  -1 -11  12   44.05    2.29 
  -1  11 -12   36.42    3.01 
   1 -11  12   36.76    2.21 
  -1 -11 -12   42.46    2.54 
   1 -11  12   45.98    2.80 
   1 -11 -13    6.12    1.90 
  -1 -11  13    8.52    1.35 
  -1  11 -13    6.83    2.39 
   1 -11  13    6.14    1.12 
  -1 -11 -13    7.64    1.88 
   1 -11  13    7.14    1.76 
  -1 -11  14    4.97    1.18 
  -1  11 -14    5.54    2.50 
   1 -11  14    7.60    1.93 
  -1 -11 -14    6.00    1.56 
  -1 -11  15    2.13    1.43 
   1 -11 -15    3.25    2.27 
  -1  11 -15    2.80    2.24 
  -1 -11 -15    4.37    2.43 
   1 -11  15    4.64    1.89 
  -1 -11  16    0.66    1.34 
  -1 -11  16    1.90    2.07 
   1 -11 -16    0.20    2.52 
  -1 -11 -16    0.47    2.24 
  -1 -12   0  149.49    5.85 
   1 -12   0  156.32    6.04 
   1 -12  -1   50.68    2.98 
  -1 -12   1   56.23    3.05 
  -1 -12  -1   56.00    3.20 
   1 -12   1   57.10    2.99 
  -1  12   1   58.35    3.74 
   1 -12  -2   84.97    3.72 
  -1 -12  -2   91.67    4.07 
   1 -12   2   98.50    4.46 
  -1  12   2   88.41    4.36 
   1 -12  -3   22.25    2.11 
  -1 -12   3   20.53    2.65 
  -1 -12  -3   20.33    1.96 
   1 -12   3   23.17    1.95 
  -1  12   3   21.82    3.04 
   1 -12  -4   40.81    2.75 
  -1 -12   4   34.94    2.81 
  -1 -12  -4   34.91    2.46 
   1 -12   4   39.98    2.72 
  -1 -12   5   58.44    3.02 
   1 -12  -5   61.18    3.07 
  -1  12  -5   54.13    3.48 
   1 -12   5   54.39    3.20 
  -1 -12  -5   61.89    3.38 
   1 -12   5   63.59    3.68 
  -1 -12   6   86.39    3.65 
  -1  12  -6   91.37    4.47 
   1 -12  -6   75.27    3.70 
  -1 -12  -6   88.37    4.18 
   1 -12   6   87.70    3.80 
   1 -12  -7   34.93    2.55 
  -1 -12   7   29.79    1.95 
  -1  12  -7   33.12    2.81 
   1 -12   7   34.61    2.31 
  -1 -12  -7   35.15    2.55 
   1 -12   7   39.21    2.38 
   1 -12  -8   26.12    2.18 
  -1 -12   8   33.01    2.11 
  -1  12  -8   30.15    2.77 
   1 -12   8   29.07    2.12 
  -1 -12  -8   27.63    2.32 
   1 -12   8   30.46    2.26 
   1 -12  -9   26.65    2.40 
  -1 -12   9   32.74    2.11 
  -1  12  -9   29.19    2.84 
   1 -12   9   33.72    2.30 
  -1 -12  -9   31.40    2.47 
   1 -12   9   28.34    2.33 
   1 -12 -10    5.33    1.71 
  -1 -12  10    7.68    1.61 
  -1  12 -10    4.52    2.17 
   1 -12  10    6.32    1.40 
  -1 -12 -10    3.98    1.64 
   1 -12  10    6.56    1.77 
   1 -12 -11    0.19    1.75 
  -1 -12  11    3.32    1.46 
  -1  12 -11    0.07    2.37 
   1 -12  11    1.77    1.46 
  -1 -12 -11   -0.20    1.68 
   1 -12  11    0.78    1.62 
   1 -12 -12   35.16    2.14 
  -1 -12  12   43.20    1.96 
  -1  12 -12   39.31    2.99 
   1 -12  12   36.88    1.79 
  -1 -12 -12   35.94    1.98 
   1 -12  12   38.20    2.21 
  -1 -12 -12   32.48    2.34 
  -1 -12  13   19.93    1.62 
  -1  12 -13   20.30    2.99 
   1 -12  13   23.90    2.14 
  -1 -12 -13   21.62    1.93 
  -1 -12 -13   24.92    2.03 
  -1 -12  14    6.14    1.37 
  -1 -12  14    4.59    2.04 
   1 -12 -14    8.52    2.28 
  -1 -12 -14    4.33    1.64 
  -1 -12  15   24.03    2.27 
   1 -12 -15   23.30    2.35 
   1 -12  15   22.63    2.20 
   1 -13   0    5.26    1.39 
  -1 -13   0    6.89    1.51 
  -1  13   0    5.55    2.57 
   1 -13  -1   31.41    2.19 
  -1 -13   1   34.56    2.75 
  -1 -13  -1   29.81    2.44 
   1 -13   1   27.77    2.38 
  -1  13   1   35.82    2.92 
   1 -13  -2   62.14    3.47 
  -1 -13   2   62.48    3.54 
  -1 -13  -2   60.82    3.39 
   1 -13   2   58.42    3.21 
  -1  13   2   63.44    4.11 
   1 -13  -3   48.17    2.87 
  -1 -13   3   48.94    3.32 
  -1 -13  -3   44.17    2.84 
   1 -13   3   51.96    3.11 
  -1 -13   4   85.76    4.04 
   1 -13  -4   78.95    3.86 
   1 -13   4   81.56    3.87 
  -1 -13  -4   81.13    3.88 
   1 -13  -5   59.47    3.43 
  -1 -13   5   58.07    3.43 
  -1 -13  -5   60.69    3.42 
   1 -13   5   65.22    3.68 
   1 -13  -6   35.99    2.75 
  -1 -13  -6   39.81    3.00 
   1 -13   6   45.83    3.46 
   1 -13  -7   37.69    2.54 
  -1 -13  -7   49.25    2.74 
   1 -13   7   41.44    2.62 
   1 -13  -8    5.82    1.96 
  -1 -13  -8    8.45    1.73 
   1 -13   8    9.91    1.73 
  -1 -13   9   14.15    1.59 
   1 -13  -9   11.31    1.97 
  -1 -13  -9   16.47    2.13 
   1 -13   9   13.99    2.32 
  -1 -13  10   38.00    2.05 
   1 -13 -10   37.10    2.27 
  -1 -13 -10   33.45    2.26 
   1 -13  10   41.07    2.38 
  -1 -13 -10   36.43    2.57 
   1 -13 -11    9.93    2.02 
  -1 -13  11   12.29    2.27 
  -1 -13 -11    9.14    1.66 
   1 -13  11   13.61    2.24 
  -1 -13 -11   11.88    2.69 
  -1 -13  12    3.31    2.06 
  -1 -13 -12    2.10    1.70 
   1 -13  12    0.66    2.33 
  -1 -13 -12    0.28    2.15 
  -1 -13  13   44.78    2.95 
   1 -13 -13   38.50    3.19 
  -1 -13 -13   44.25    2.32 
   1 -13  13   44.46    2.52 
  -1 -13 -13   44.76    2.78 
  -1 -13  14   32.12    2.35 
   1 -13  14   36.22    2.96 
  -1 -13 -14   35.13    2.92 
  -1 -14   0   46.47    2.90 
   1 -14   0   48.78    3.13 
  -1  14   0   38.72    3.62 
  -1 -14   1   25.91    2.66 
   1 -14  -1   28.59    2.52 
  -1  14  -1   17.89    3.01 
  -1 -14  -1   23.47    2.70 
  -1  14   1   21.60    3.54 
   1 -14   1   27.47    2.58 
   1 -14  -2   18.07    2.20 
  -1 -14   2   21.48    2.40 
  -1  14  -2   22.14    2.89 
  -1 -14  -2   19.27    2.27 
   1 -14   2   21.99    2.34 
   1 -14  -3   69.80    3.66 
  -1 -14   3   71.12    6.27 
  -1 -14  -3   70.74    3.39 
   1 -14   3   74.74    3.89 
   1 -14  -4   31.93    2.49 
  -1 -14   4   27.60    2.61 
  -1 -14  -4   25.79    2.39 
   1 -14   4   28.24    2.57 
   1 -14  -5    8.11    2.01 
  -1 -14   5    6.65    2.32 
  -1 -14  -5   12.53    2.00 
   1 -14   5    9.93    1.71 
   1 -14  -6    5.51    1.75 
  -1 -14   6    1.20    1.90 
  -1 -14  -6    3.93    1.82 
   1 -14   6    4.74    1.91 
   1 -14  -7   14.21    2.05 
  -1 -14  -7   20.55    1.80 
   1 -14   7   22.67    2.04 
   1 -14  -8   15.61    1.82 
  -1 -14  -8   16.06    1.84 
   1 -14   8   12.61    2.29 
  -1 -14  -8   18.55    2.53 
   1 -14  -9    8.92    2.09 
  -1 -14  -9   10.77    1.82 
   1 -14   9   11.84    2.15 
  -1 -14  -9    7.61    2.31 
  -1 -14 -10    3.34    1.73 
   1 -14  10    3.19    2.02 
  -1 -14 -10    3.88    2.84 
   1 -14 -11   18.61    2.40 
   1 -14  11   17.51    2.31 
  -1 -14 -11   19.74    2.36 
  -1 -14 -11   19.25    1.92 
  -1 -14  12    6.18    2.15 
   1 -14 -12    6.21    2.72 
  -1 -14 -12    8.76    1.86 
   1 -14  12    7.01    2.16 
  -1 -14 -12    8.38    2.45 
  -1 -14  13    7.72    2.81 
   1 -14 -13    6.27    3.34 
   1 -14  13    3.78    2.54 
   1 -15   0   17.76    2.32 
  -1 -15   0   13.10    2.06 
  -1  15   0   15.95    3.41 
   1 -15  -1    6.71    1.56 
  -1  15  -1    9.57    2.66 
  -1 -15   1    9.18    2.32 
   1 -15   1    6.10    1.93 
  -1 -15  -1    9.06    1.89 
   1 -15  -2    3.29    2.02 
  -1  15  -2    1.50    2.35 
  -1 -15   2    2.65    1.86 
   1 -15   2    2.89    1.99 
  -1 -15  -2    0.24    1.96 
   1 -15  -3    9.28    2.12 
  -1  15  -3    6.97    2.59 
  -1 -15   3    6.23    1.87 
   1 -15   3    5.09    2.12 
  -1 -15  -3    5.09    1.91 
   1 -15  -4    4.58    1.87 
  -1  15  -4    2.33    2.92 
  -1 -15   4    2.73    2.15 
   1 -15   4   -0.34    1.78 
  -1 -15  -4    3.59    1.77 
   1 -15  -5   14.44    2.17 
  -1  15  -5   17.41    2.39 
  -1 -15   5   15.82    2.43 
   1 -15   5   14.93    1.94 
  -1 -15  -5   15.33    2.03 
   1 -15  -6    9.96    2.10 
  -1 -15   6   11.38    2.08 
  -1 -15  -6   10.25    1.82 
   1 -15   6    9.81    2.11 
   1 -15  -7    4.40    1.97 
  -1 -15   7    5.20    2.14 
  -1 -15  -7    2.95    1.72 
   1 -15   7    6.75    1.96 
  -1 -15  -8   -0.11    1.67 
   1 -15   8   -1.80    2.01 
  -1 -15  -8    1.38    2.80 
   1 -15  -9    7.69    2.67 
   1 -15   9    4.75    2.11 
  -1 -15  -9    4.53    2.86 
  -1 -15  -9    5.23    1.53 
   1 -15 -10    6.87    2.87 
   1 -15  10    4.93    2.05 
  -1 -15 -10    9.03    3.02 
  -1 -15 -10    8.87    1.94 
  -1  15 -11   12.03    6.46 
   1 -15  11    0.35    2.20 
   1 -16   0    0.72    2.00 
  -1 -16   0    0.44    1.70 
   1 -16  -1   17.53    2.55 
  -1 -16   1   21.69    3.48 
  -1 -16  -1   22.17    2.18 
   1 -16   1   21.67    2.35 
   1 -16  -2    9.05    2.38 
  -1  16  -2    8.22    3.09 
  -1 -16   2   12.05    2.32 
   1 -16   2    7.48    3.03 
  -1 -16  -2    9.32    1.92 
   1 -16  -3   -0.08    2.15 
  -1  16  -3    0.84    2.92 
  -1 -16   3    1.07    2.04 
   1 -16   3    1.99    2.18 
  -1 -16  -3   -0.25    2.04 
   1 -16  -4    0.49    1.94 
  -1  16  -4    1.43    2.91 
  -1 -16   4    3.79    1.77 
   1 -16   4    4.23    1.93 
  -1 -16  -4   -0.01    1.85 
   1 -16  -5   17.25    2.11 
  -1  16  -5   19.42    3.40 
  -1 -16   5   18.99    2.40 
   1 -16   5   19.73    2.34 
  -1 -16  -5   16.47    1.87 
  -1  16  -6   23.54    3.41 
  -1 -16   6   28.46    2.45 
   1 -16   6   26.46    2.51 
  -1 -16  -6   27.30    1.96 
  -1  16  -7    9.37    3.01 
  -1 -16   7   15.35    2.01 
   1 -16   7   12.48    2.30 
  -1 -16  -7   10.62    1.99 
  -1 -16   8   12.87    1.91 
  -1  16  -8   15.30    3.45 
   1 -16   8   13.24    2.48 
  -1 -16   9    9.37    2.51 
  -1 -17   0    7.13    2.42 
  -1 -17  -1   11.08    2.34 
  -1 -17   2   42.70    5.04 
  -1 -17  -2   42.94    2.54 
   1 -17   2   40.93    5.10 
  -1 -17  -3    0.37    2.07 
  -1 -17   4   41.69    2.68 
  -1 -17  -4   41.82    2.49 
  -1 -17   5   10.54    4.43 
   2   0   0  176.05    7.30 
  -2   0   0  161.66    7.12 
   2   0   0  165.12    7.10 
  -2   0  -1   26.52    2.92 
   2   0   1   29.18    3.15 
   2   0  -1   27.68    2.93 
  -2   0   1   26.93    2.63 
  -2   0   1   27.93    2.92 
  -2   0  -1   27.64    3.17 
   2   0   1   24.90    3.05 
  -2   0  -2 1082.46   23.16 
   2   0   2 1017.82   22.38 
   2   0  -2 1104.62   23.79 
  -2   0   2 1030.24   22.88 
  -2   0   2 1014.93   21.40 
  -2   0  -2 1008.88   22.42 
  -2   0  -3 2014.72   37.07 
   2   0  -3 2097.99   40.11 
  -2   0  -3 2142.66   41.64 
  -2   0  -4  511.02   22.91 
   2   0  -4  501.95   18.66 
  -2   0  -4  528.67   22.11 
  -2   0  -5  228.45   10.18 
   2   0  -5  213.39    7.91 
  -2   0  -6  386.05   15.17 
   2   0  -6  374.88    9.54 
  -2   0  -7    2.80    2.72 
   2   0  -7    3.84    2.87 
  -2   0  -8  142.44    6.40 
   2   0  -8  159.82    7.27 
  -2   0  -9  705.89   24.73 
   2   0  -9  779.20   18.61 
  -2   0 -10   15.11    3.59 
   2   0 -10   13.70    3.69 
  -2   0 -11   50.71    4.52 
   2   0 -11   58.07    4.40 
  -2   0 -11   47.46    2.59 
   2   0 -11   53.02    2.48 
  -2   0 -11   54.00    2.73 
   2   0  11   58.79    2.62 
  -2   0  11   58.09    2.61 
  -2   0  11   56.42    2.41 
  -2   0 -12    3.27    3.00 
   2   0 -12    2.12    3.60 
  -2   0  12    2.53    0.91 
  -2   0 -12    2.02    2.13 
   2   0 -12    1.10    1.49 
  -2   0 -12    3.63    1.43 
   2   0  12    3.04    1.29 
  -2   0  12    3.47    1.04 
  -2   0  12    4.55    1.30 
  -2   0  12    3.32    1.18 
  -2   0 -13  435.52   17.39 
   2   0 -13  426.22   16.96 
  -2   0 -13  431.39   18.28 
  -2   0  13  462.96   16.73 
  -2   0 -13  473.52   17.46 
   2   0 -13  442.28   15.00 
  -2   0 -13  474.22   17.35 
   2   0  13  464.72   17.07 
  -2   0  13  461.01   16.92 
  -2   0  13  479.11   17.75 
  -2   0  13  455.21   16.50 
  -2   0 -14   37.56    4.34 
   2   0 -14   50.36    4.24 
  -2   0 -14   42.87    6.42 
  -2   0  14   49.83    2.40 
  -2   0 -14   43.18    3.52 
   2   0 -14   45.74    2.95 
  -2   0 -14   40.54    2.82 
   2   0 -14   45.49    2.79 
   2   0  14   39.27    2.32 
  -2   0  14   44.31    2.60 
  -2   0  14   45.38    2.48 
  -2   0  15    5.37    1.42 
  -2   0 -15    5.21    2.06 
   2   0 -15    5.50    1.69 
  -2   0 -15    2.76    1.92 
   2   0 -15    6.44    2.02 
   2   0  15    3.65    1.36 
  -2   0  15    0.12    1.72 
  -2   0  15    4.71    1.65 
  -2   0  16    1.16    1.22 
  -2   0 -16   -1.30    1.35 
   2   0 -16   -0.04    1.51 
  -2   0 -16   -0.04    2.14 
   2   0 -16   -0.28    2.10 
   2   0  16   -2.59    1.67 
  -2   0  16    2.05    1.81 
  -2   0  16   -0.58    1.63 
  -2   0  17    0.88    1.21 
  -2   0 -17   -0.82    2.03 
   2   0 -17    1.54    2.08 
  -2   0 -17    0.53    1.96 
   2   0 -17    3.19    2.06 
   2   0  17   -0.58    2.10 
  -2   0  17    2.34    1.72 
  -2   0  18    3.93    1.46 
  -2   0 -18    3.20    2.02 
   2   0 -18    5.53    1.93 
  -2   0 -18    4.57    2.17 
   2   0 -18   -1.71    2.22 
   2   0  18    3.17    2.08 
  -2   0  18    4.03    1.36 
   2   0 -19    1.27    1.93 
   2   0  19    1.78    1.81 
  -2   0 -19   -0.19    2.01 
   2   0 -19    3.01    2.38 
  -2   0  19   -0.29    1.35 
  -2   0 -19    3.60    3.10 
   2   0 -20    3.86    2.38 
   2   0  20    2.41    1.68 
  -2   0 -20    5.97    2.03 
   2   0 -20    3.45    2.54 
  -2   0  20    4.67    1.72 
  -2   0 -20    1.26    2.55 
   2   0  21    1.35    1.82 
  -2   0  21   -0.55    1.46 
  -2   0 -21    1.03    2.79 
  -2   0 -21    0.20    2.25 
   2   0 -21    1.29    2.75 
   2   1   0 1521.96   30.05 
   2   1   0 1505.65   28.95 
   2  -1   0 1481.06   28.99 
  -2   1   0 1421.57   29.18 
  -2  -1   0 1474.51   29.67 
   2   1   0 1487.27   30.37 
  -2  -1   1  572.13   20.71 
   2   1   1  581.87   21.34 
  -2  -1   1  587.49   20.93 
   2  -1  -1  579.30   21.47 
  -2   1  -1  597.21   22.85 
   2   1   1  555.92   21.50 
   2   1  -1  600.36   21.44 
   2  -1   1  569.30   20.88 
  -2  -1  -1  574.87   21.53 
  -2  -1  -1  576.62   20.91 
   2   1  -1  549.44   20.83 
  -2   1  -2  631.86   23.27 
  -2  -1   2  643.39   22.95 
   2   1   2  711.92   25.11 
  -2  -1   2  730.94   25.04 
   2  -1  -2  670.57   23.58 
  -2   1  -2  690.48   25.15 
  -2  -1  -2  695.05   24.56 
   2   1  -2  676.33   23.65 
  -2  -1  -2  709.98   25.54 
  -2   1  -3  554.68   20.76 
  -2   1  -3  538.77   20.87 
   2  -1  -3  537.80   19.84 
  -2  -1  -3  532.36   19.78 
  -2  -1  -3  530.33   20.59 
   2   1  -3  546.58   20.23 
  -2   1  -4  829.37   19.73 
  -2   1  -4  843.40   20.89 
   2  -1  -4  850.65   18.31 
  -2  -1  -4  881.91   19.97 
  -2   1   4  880.99   20.03 
   2   1  -4  857.59   19.92 
  -2   1  -5  583.97   21.31 
   2  -1  -5  612.20   22.37 
  -2  -1  -5  610.00   22.60 
   2   1  -5  618.07   22.73 
  -2   1  -6  190.47    8.09 
   2  -1  -6  206.41    8.61 
  -2  -1  -6  202.70    7.96 
   2   1  -6  189.04    7.44 
  -2   1  -7   36.06    3.62 
   2  -1  -7   30.16    3.63 
  -2  -1  -7   38.50    3.80 
   2   1  -7   40.61    4.19 
  -2   1  -8  200.31    7.49 
   2  -1  -8  201.01    7.57 
  -2  -1  -8  192.45    7.50 
   2   1  -8  219.34    9.64 
  -2   1  -9  129.26    7.56 
   2  -1  -9  137.23    7.60 
  -2  -1  -9  150.04    7.61 
   2   1  -9  123.89    7.54 
  -2   1 -10    9.30    3.86 
   2  -1 -10   13.42    2.82 
  -2  -1 -10   11.62    2.71 
   2   1 -10   10.53    3.49 
  -2   1 -11  127.00    6.90 
  -2  -1  11  107.22    6.06 
  -2  -1  11  121.63    5.42 
   2  -1 -11  119.20    6.69 
  -2   1 -11  123.93    5.28 
  -2  -1  11  116.75    4.81 
   2  -1 -11  124.93    5.31 
  -2   1 -11  110.87    6.47 
  -2  -1  11  118.38    4.77 
  -2  -1 -11  143.04    7.78 
   2   1 -11  125.06    5.44 
  -2  -1 -11  124.78    5.24 
   2  -1  11  119.46    5.09 
  -2   1  11  121.12    5.13 
   2   1 -11  117.99    6.94 
  -2  -1 -11  112.23    6.60 
  -2   1  11  114.62    6.67 
  -2   1 -12   33.81    4.34 
   2   1  12   25.45    1.96 
  -2  -1  12   29.13    1.89 
   2  -1 -12   31.54    3.90 
  -2  -1  12   24.58    1.47 
  -2   1 -12   28.45    2.00 
  -2   1 -12   30.24    2.08 
   2  -1 -12   29.43    2.48 
  -2  -1  12   27.81    2.42 
  -2  -1  12   29.05    2.04 
  -2   1  12   26.54    1.73 
   2   1 -12   30.32    2.56 
  -2  -1 -12   25.42    2.32 
  -2  -1 -12   30.45    2.10 
   2   1 -12   31.25    4.57 
  -2   1  12   26.29    2.03 
  -2  -1 -12   18.52    3.03 
  -2   1  12   28.96    2.42 
   2  -1  12   24.92    1.83 
  -2   1  12   28.42    1.83 
  -2   1 -13   11.01    3.11 
   2   1  13   14.49    1.49 
  -2  -1  13   12.08    1.81 
  -2   1 -13   10.61    4.63 
  -2  -1  13   12.67    1.19 
  -2   1 -13   14.26    1.68 
  -2  -1  13   18.05    1.65 
  -2   1 -13   13.67    1.74 
  -2  -1 -13   12.07    4.26 
  -2   1  13   10.80    1.47 
   2   1 -13   14.70    2.28 
  -2  -1 -13   11.62    1.85 
   2  -1  13   13.39    1.53 
  -2  -1 -13   15.84    4.05 
   2   1 -13    9.47    2.88 
  -2   1  13   14.50    1.92 
  -2   1  13   11.90    2.04 
  -2  -1 -13   12.56    1.67 
  -2   1  13   10.66    1.88 
  -2   1 -14   54.14    5.73 
  -2  -1  14   49.64    2.19 
   2   1  14   50.92    2.73 
  -2   1 -14   39.32    5.67 
  -2   1 -14   45.64    3.11 
  -2   1 -14   50.88    3.08 
   2  -1 -14   52.76    2.74 
  -2  -1  14   47.12    2.51 
  -2  -1  14   54.13    2.70 
  -2  -1 -14   33.96    4.91 
  -2   1  14   50.48    2.31 
  -2  -1 -14   40.14    2.72 
   2   1 -14   49.61    3.08 
  -2  -1 -14   46.37    3.02 
   2   1 -14   48.31    2.91 
   2  -1  14   44.41    2.61 
   2   1 -14   64.71    5.81 
  -2   1  14   45.30    2.65 
  -2   1  14   49.49    3.08 
  -2   1  14   48.01    2.55 
  -2  -1  15   11.46    1.50 
   2   1  15   11.98    1.48 
  -2   1 -15   10.64    1.70 
  -2  -1  15   13.11    1.80 
  -2   1 -15   12.47    1.94 
   2  -1 -15   12.76    2.27 
  -2  -1  15    9.51    1.97 
  -2   1  15   11.77    1.49 
  -2  -1 -15    9.82    1.67 
   2   1 -15   11.28    2.04 
   2  -1  15    9.75    1.87 
   2   1 -15   14.65    2.40 
  -2  -1 -15   14.64    2.32 
  -2   1  15   16.03    1.66 
  -2  -1  16   17.87    1.63 
   2   1  16   17.17    1.99 
  -2   1 -16   14.78    2.17 
  -2  -1  16   15.51    1.79 
  -2   1 -16   18.74    2.26 
   2  -1 -16   16.40    2.15 
  -2  -1  16   16.13    1.81 
  -2   1  16   15.07    1.68 
  -2  -1 -16   15.82    2.30 
   2   1 -16   15.15    2.32 
   2  -1  16   19.08    2.10 
   2   1 -16   18.69    2.38 
  -2  -1 -16   14.03    2.17 
  -2   1  16   15.79    1.61 
  -2  -1  17   74.07    3.70 
   2   1  17   66.28    3.84 
  -2   1 -17   78.09    4.36 
  -2   1 -17   70.49    4.15 
   2  -1 -17   63.93    3.84 
  -2  -1  17   71.07    4.26 
  -2  -1 -17   65.31    3.87 
  -2   1  17   69.85    3.54 
  -2  -1 -17   77.81    4.50 
   2   1 -17   64.71    4.01 
   2  -1  17   70.19    3.96 
   2   1 -17   68.00    3.75 
  -2  -1  18    0.57    1.44 
   2  -1 -18    2.06    2.20 
   2   1  18    0.78    1.78 
  -2  -1  18    1.12    1.84 
  -2   1 -18    6.15    2.23 
  -2   1 -18   -0.81    2.52 
  -2  -1 -18    3.32    2.28 
   2   1 -18    0.27    2.12 
   2   1 -18    3.89    2.53 
   2  -1  18    0.89    1.51 
  -2  -1 -18    4.15    2.18 
  -2  -1  19    8.07    1.60 
   2  -1 -19    7.71    2.19 
  -2  -1  19    7.58    2.00 
   2   1  19    8.67    1.81 
  -2   1 -19    8.33    2.23 
  -2   1 -19    7.85    1.90 
  -2  -1 -19    5.45    2.28 
   2   1 -19   10.71    2.20 
   2  -1  19    9.25    1.68 
   2   1 -19    5.40    2.20 
  -2  -1 -19    5.70    2.43 
   2  -1 -20   10.40    2.18 
  -2   1 -20   11.69    2.56 
   2   1  20    9.31    1.69 
  -2   1 -20    7.68    2.87 
  -2  -1 -20    8.80    2.20 
   2   1 -20    7.68    2.54 
   2   1 -20   12.23    2.01 
   2  -1  20   11.48    1.81 
  -2  -1 -20    6.92    2.85 
   2   1  21    1.34    2.01 
  -2  -1  21    3.21    1.85 
   2  -1 -21    1.71    2.39 
  -2   1 -21    0.99    2.58 
   2  -1  21    1.70    1.88 
  -2  -1 -21    1.85    2.30 
  -2  -1 -21    2.06    2.99 
   2   1 -21    3.49    2.42 
   2  -2   0  409.19   16.92 
  -2  -2   0  461.62   17.56 
   2   2   0  432.04   17.16 
   2  -2  -1  309.27   12.16 
   2   2   1  297.04   18.18 
  -2  -2   1  296.33   12.57 
   2   2   1  297.94   12.63 
   2   2  -1  315.15   12.56 
   2  -2   1  290.71   12.03 
  -2  -2  -1  302.80   13.58 
  -2  -2  -1  298.03   12.00 
  -2   2   1  305.55   12.42 
   2   2  -1  289.35   12.20 
  -2   2  -2 1016.20   21.79 
   2   2   2 1036.34   22.86 
   2   2  -2 1098.54   22.62 
  -2  -2  -2 1041.72   23.08 
  -2   2   2 1078.38   22.90 
  -2  -2  -2  977.49   21.89 
  -2   2  -3  396.20   15.25 
   2   2   3  373.26   10.23 
   2   2  -3  370.32    9.33 
  -2  -2  -3  405.02   15.76 
  -2   2   3  403.90   15.38 
  -2  -2  -3  389.09   15.85 
  -2   2  -4  538.02   19.96 
  -2   2  -4  537.00   20.87 
  -2  -2  -4  509.82   19.27 
  -2   2   4  527.48   19.33 
   2   2  -4  554.07   20.49 
  -2  -2  -4  532.14   20.96 
  -2   2  -5  587.89   21.23 
  -2   2  -5  609.35   23.72 
   2   2  -5  574.34   21.85 
  -2  -2  -5  584.92   20.88 
  -2   2  -6  253.39   11.02 
   2   2  -6  271.28   11.01 
  -2  -2  -6  267.29   11.19 
  -2   2  -7  151.72    6.95 
  -2  -2  -7  157.66    7.00 
   2   2  -7  167.64    7.34 
  -2   2  -8  589.32   21.37 
   2   2  -8  571.26   21.26 
  -2  -2  -8  599.52   21.40 
  -2   2  -9  338.99   14.66 
   2   2  -9  377.78   15.77 
  -2  -2  -9  387.83   16.43 
  -2   2 -10  101.26    7.42 
   2   2 -10  101.75    7.52 
  -2  -2 -10  108.80    7.53 
  -2   2 -11   23.28    3.04 
  -2   2 -11   26.45    2.00 
   2   2  11   26.85    1.73 
  -2  -2  11   26.38    1.51 
  -2  -2  11   25.21    1.64 
  -2  -2 -11   32.01    3.86 
  -2  -2 -11   27.71    1.99 
   2  -2  11   28.58    1.78 
   2   2 -11   23.84    3.99 
   2   2 -11   26.60    2.23 
  -2   2  11   25.57    2.53 
  -2   2  11   26.25    1.80 
  -2  -2  12  129.45    4.84 
  -2  -2  12  138.07    5.02 
  -2   2 -12  136.73    8.19 
  -2   2 -12  140.96    5.59 
  -2   2 -12  130.03    4.92 
   2   2  12  130.74    4.73 
   2   2 -12  149.34    8.23 
  -2  -2 -12  119.71    7.05 
  -2  -2 -12  126.69    4.96 
   2   2 -12  125.58    5.09 
   2  -2  12  127.33    4.76 
  -2   2  12  137.96    4.86 
  -2  -2 -12  124.93    5.31 
  -2   2  12  123.82    4.92 
  -2   2  12  133.12    4.82 
  -2   2 -13   81.13    5.68 
  -2  -2  13   83.97    4.00 
   2   2  13   84.80    3.64 
  -2   2 -13   91.59    7.38 
  -2  -2  13   85.19    3.42 
  -2  -2  13   87.18    3.70 
  -2   2 -13   79.19    3.90 
  -2   2 -13   84.08    3.77 
  -2  -2 -13   81.91    3.69 
  -2  -2 -13   79.09    3.54 
   2   2 -13   86.01    4.07 
   2   2 -13   92.60    4.22 
   2  -2  13   89.23    4.01 
  -2  -2 -13   83.12    6.45 
   2   2 -13   76.12    5.98 
  -2  -2 -13   90.40    4.38 
  -2   2  13   86.23    4.13 
  -2   2  13   82.30    3.36 
  -2   2  13   79.49    3.32 
  -2   2 -14   23.73    4.67 
  -2  -2  14   24.89    1.65 
  -2  -2  14   23.94    2.22 
  -2   2 -14   24.30    4.65 
  -2   2 -14   21.70    2.34 
  -2   2 -14   23.38    2.36 
   2  -2 -14   25.85    1.86 
   2   2  14   21.12    2.05 
  -2  -2  14   24.91    1.89 
  -2  -2 -14   19.24    4.63 
  -2   2  14   22.05    1.50 
   2   2 -14   24.72    2.43 
  -2  -2 -14   20.96    2.27 
  -2  -2 -14   25.15    1.99 
   2   2 -14   21.90    2.13 
   2  -2  14   21.10    2.12 
   2   2 -14   18.26    4.10 
  -2  -2 -14   22.84    2.59 
  -2   2  14   20.75    2.65 
  -2   2  14   24.62    1.99 
  -2  -2  15    3.71    1.21 
   2   2  15    6.49    1.66 
  -2   2 -15    3.64    1.96 
  -2  -2  15    0.13    1.40 
  -2   2 -15   -2.51    2.06 
   2  -2 -15    5.77    2.09 
  -2  -2  15    2.30    1.29 
  -2   2  15    2.23    1.38 
  -2  -2 -15    3.11    1.88 
   2   2 -15    6.36    2.19 
   2  -2  15    2.30    1.79 
   2   2 -15    3.89    1.95 
  -2  -2 -15    2.76    2.07 
  -2   2  15    4.23    1.55 
  -2  -2  16   12.74    1.51 
  -2   2 -16    8.92    2.20 
   2   2  16   10.64    1.96 
  -2   2 -16    9.38    2.22 
   2  -2 -16   13.08    2.03 
  -2  -2  16   14.43    2.09 
  -2  -2 -16   14.84    2.30 
  -2  -2 -16   11.80    1.75 
   2   2 -16    8.94    2.06 
   2  -2  16   10.90    2.04 
   2   2 -16   15.39    2.42 
  -2   2  16   14.31    1.76 
  -2  -2  17    9.86    1.50 
   2  -2 -17    7.41    2.17 
   2   2  17    9.52    2.16 
   2  -2 -17    3.68    1.98 
  -2   2 -17    7.92    2.23 
  -2  -2  17   10.27    2.20 
  -2  -2 -17    8.93    2.24 
  -2  -2 -17    7.63    2.32 
   2   2 -17   10.29    2.26 
   2   2 -17    8.86    2.12 
  -2  -2  18    0.31    1.34 
  -2  -2  18   -2.06    1.62 
   2  -2 -18   -4.26    1.97 
   2  -2 -18    1.09    2.46 
  -2   2 -18    0.44    2.27 
   2   2  18   -1.07    1.83 
  -2   2 -18    1.44    2.59 
  -2  -2 -18    0.00    1.79 
   2   2 -18   -0.35    2.02 
  -2  -2 -18   -2.69    1.86 
   2  -2  18   -2.88    1.76 
   2   2 -18   -1.78    2.39 
  -2  -2  19    8.40    1.52 
   2  -2 -19    6.43    1.93 
   2  -2 -19    7.79    2.23 
  -2   2 -19    8.26    2.63 
  -2   2 -19    6.13    2.63 
  -2  -2  19    6.65    2.12 
   2   2 -19    6.88    2.51 
   2   2 -19   10.11    1.91 
  -2  -2 -19    6.23    2.22 
   2  -2  19    8.98    1.76 
   2  -2 -20    6.01    2.06 
  -2   2 -20    4.11    2.36 
   2   2  20    3.89    1.77 
  -2  -2  20    4.73    1.55 
   2  -2 -20    4.88    2.12 
  -2  -2 -20    6.89    2.35 
  -2   2  20    3.73    1.75 
   2  -2  20    5.54    1.71 
  -2  -2 -20    4.73    2.55 
   2   2 -20    3.12    2.43 
   2  -2 -21    6.87    2.56 
  -2  -2  21    5.86    1.81 
  -2   2 -21    5.92    2.65 
  -2  -2 -21    4.53    2.38 
   2  -2  21    4.93    1.62 
   2   2 -21    4.95    2.61 
  -2  -3   0  259.88   11.58 
  -2  -3   0  271.27   12.20 
   2   3   0  282.33   12.00 
  -2   3   0  254.73   11.64 
  -2   3  -1  814.51   19.77 
  -2  -3   1  777.91   18.90 
   2   3  -1  821.09   19.18 
  -2  -3  -1  808.44   18.97 
  -2  -3  -1  817.40   20.79 
   2   3   2  714.81   25.98 
  -2  -3   2  728.72   25.61 
  -2   3  -2  715.82   25.76 
  -2  -3  -2  766.76   18.34 
   2   3  -2  746.99   26.69 
  -2   3   2  790.02   18.03 
  -2   3  -3  211.29    8.83 
   2   3   3  224.64   10.02 
  -2  -3  -3  219.40    9.97 
  -2  -3  -3  197.60   11.50 
  -2   3   3  237.11   10.00 
  -2  -3  -3  228.69   13.86 
   2   3  -3  216.01    9.74 
   2   3  -4   24.88    3.34 
  -2  -3  -4   26.19    2.97 
  -2  -3  -4   25.11    2.96 
  -2   3   4   25.02    3.44 
  -2  -3  -4   25.81    3.60 
  -2   3  -5  492.44   19.00 
  -2  -3  -5  509.15   18.89 
  -2   3   5  536.10   19.33 
   2   3  -6  180.94    7.76 
  -2  -3  -6  168.34    6.95 
  -2   3  -7  793.08   18.82 
  -2   3  -7  728.60   26.62 
   2  -3  -7  803.31   17.96 
  -2  -3  -7  772.39   17.95 
   2   3  -7  726.72   25.78 
  -2   3  -8    5.34    3.39 
  -2   3  -8   -3.63    3.61 
   2  -3  -8    4.38    2.69 
  -2  -3  -8    2.04    2.97 
   2   3  -8    2.25    3.31 
  -2   3  -9   55.57    4.09 
  -2   3  -9   64.89    6.64 
   2  -3  -9   64.61    5.34 
  -2  -3  -9   63.34    5.57 
   2   3  -9   58.44    4.85 
  -2   3 -10   74.72    6.33 
  -2   3 -10   76.55    7.12 
   2  -3 -10   70.49    5.88 
  -2  -3 -10   65.74    5.52 
   2   3 -10   74.18    6.27 
  -2   3 -11    9.35    2.78 
  -2  -3  11    7.30    1.45 
  -2   3 -11    9.03    1.36 
   2  -3 -11    7.51    3.53 
  -2   3 -11    6.73    4.30 
   2  -3 -11   11.92    1.72 
  -2  -3  11    9.47    1.04 
   2   3  11    9.76    1.28 
  -2  -3  11    9.19    1.79 
  -2  -3  11    9.71    1.39 
  -2  -3 -11   10.25    3.18 
   2   3 -11    9.95    3.66 
   2  -3  11    9.66    1.38 
  -2  -3 -11    9.39    1.56 
   2  -3  11   10.05    1.73 
   2   3 -11   10.85    2.06 
  -2  -3 -11    8.96    1.75 
  -2   3  11    7.99    1.47 
  -2   3  11    9.14    2.01 
  -2   3  11    9.67    1.30 
  -2   3  11    8.99    1.44 
  -2   3 -12   15.02    2.85 
  -2   3 -12   12.88    4.74 
  -2   3 -12   14.39    1.77 
   2  -3 -12   14.79    2.72 
  -2  -3  12   11.51    1.42 
  -2  -3  12   15.29    1.59 
  -2  -3  12   15.88    1.60 
  -2   3 -12   13.94    1.99 
  -2  -3  12   12.02    1.46 
   2  -3 -12   13.75    1.49 
   2   3  12   11.48    1.76 
   2   3 -12   12.03    3.97 
  -2   3  12   13.24    1.36 
  -2  -3 -12   14.76    1.27 
  -2  -3 -12   11.77    2.83 
   2   3 -12   14.42    2.14 
   2  -3  12   15.51    1.88 
   2  -3  12   16.98    1.19 
  -2  -3 -12   11.68    2.05 
  -2   3  12   11.65    1.69 
  -2  -3 -12   15.99    2.15 
  -2   3  12   16.65    1.73 
  -2  -3 -12   15.49    1.86 
  -2   3  12   12.78    1.62 
  -2   3 -13   38.19    4.85 
  -2   3 -13   48.04    2.79 
  -2   3 -13   37.37    2.56 
   2  -3 -13   41.57    4.89 
  -2   3 -13   39.42    5.70 
  -2  -3  13   42.58    2.16 
   2  -3 -13   38.21    2.73 
  -2  -3  13   39.24    3.05 
   2   3  13   40.45    2.54 
  -2  -3 -13   42.28    4.58 
   2   3 -13   43.79    3.02 
   2  -3  13   44.26    2.38 
  -2  -3 -13   40.72    2.61 
   2   3 -13   45.92    4.04 
   2  -3  13   38.58    2.68 
  -2  -3 -13   41.63    3.04 
   2   3 -13   41.98    2.86 
  -2   3  13   43.14    2.68 
  -2  -3 -13   47.61    2.92 
  -2   3  13   41.41    3.02 
  -2   3  13   44.37    2.68 
  -2   3 -14   23.52    4.42 
  -2   3 -14   20.73    2.37 
   2  -3 -14   21.78    3.83 
  -2   3 -14   20.15    4.92 
  -2  -3  14   23.62    1.56 
   2  -3 -14   22.16    2.05 
  -2  -3  14   23.29    1.95 
   2   3  14   21.32    1.94 
  -2   3 -14   21.48    2.31 
  -2  -3 -14   21.30    3.54 
   2  -3  14   22.27    1.49 
   2   3 -14   23.92    2.54 
  -2  -3 -14   24.15    1.94 
   2   3 -14   22.80    4.09 
   2  -3  14   22.88    2.14 
  -2  -3 -14   25.21    2.33 
   2   3 -14   20.89    2.32 
  -2   3  14   22.02    2.07 
  -2  -3 -14   25.11    2.57 
  -2   3  14   23.33    1.95 
  -2   3  14   19.09    1.75 
  -2   3 -15   48.20    3.33 
  -2  -3  15   49.83    2.40 
  -2   3 -15   53.22    3.23 
  -2  -3  15   48.22    2.89 
   2   3  15   49.53    2.68 
   2  -3 -15   49.19    3.21 
   2  -3  15   48.32    2.38 
   2   3 -15   43.82    2.90 
   2  -3  15   44.75    2.60 
   2   3 -15   54.32    3.39 
  -2  -3 -15   44.15    2.69 
  -2   3  15   51.54    2.75 
  -2  -3 -15   43.07    3.24 
  -2   3  15   43.98    3.06 
  -2   3  15   44.61    2.69 
  -2  -3  16   21.40    1.48 
  -2  -3  16   16.50    2.33 
   2   3  16   23.14    2.14 
   2  -3 -16   18.62    2.34 
  -2   3 -16   18.90    3.27 
  -2   3 -16   15.43    2.56 
   2   3 -16   18.37    2.36 
   2   3 -16   17.68    2.21 
  -2  -3 -16   18.05    1.83 
  -2   3  16   18.04    2.12 
   2  -3  16   19.05    1.97 
  -2  -3 -16   20.41    2.53 
  -2   3  16   18.79    1.89 
  -2  -3  17   25.00    2.06 
   2   3  17   25.34    2.42 
  -2   3 -17   21.68    2.62 
   2  -3 -17   25.27    2.62 
  -2  -3  17   20.85    1.99 
  -2   3 -17   23.46    2.81 
   2  -3  17   26.08    2.23 
  -2  -3 -17   21.81    2.24 
   2   3 -17   22.25    2.36 
  -2   3  17   23.76    2.24 
  -2  -3  18    4.43    1.33 
   2   3  18    5.25    1.85 
   2  -3 -18    3.09    2.19 
   2  -3 -18   -0.25    2.43 
  -2  -3  18    3.17    1.70 
  -2   3 -18    1.55    2.60 
   2  -3  18    2.10    1.19 
  -2  -3 -18    3.97    1.99 
   2   3 -18    2.64    1.65 
  -2   3  18    3.48    1.87 
  -2  -3  19    4.52    1.37 
   2  -3 -19    8.47    2.22 
   2  -3 -19    8.73    2.06 
  -2  -3  19    7.66    1.65 
  -2   3 -19    8.82    2.96 
   2  -3  19    6.56    1.77 
  -2   3  19    5.92    2.14 
  -2  -3 -19    5.21    2.23 
   2   3 -19    6.52    2.26 
  -2  -3  20    3.73    1.38 
   2  -3 -20    5.85    2.02 
  -2   3 -20    2.14    2.22 
  -2  -3  20    1.68    1.46 
   2   3  20    3.52    1.84 
   2  -3 -20    3.50    2.27 
  -2  -3 -20    3.63    1.90 
  -2   3  20    3.02    1.76 
   2  -3  20    5.18    2.04 
   2   3 -20    4.51    2.35 
  -2  -3 -20    3.49    2.88 
  -2  -3  21    0.38    2.05 
   2  -3  21    5.60    3.31 
  -2  -3 -21    1.44    2.64 
   2   3 -21    2.03    2.75 
  -2  -4   0  407.53   16.12 
  -2  -4   0  391.52   15.55 
   2  -4   0  392.96   15.49 
   2   4   0  398.33   16.67 
  -2   4   0  408.62   16.38 
   2  -4  -1  298.18   11.93 
  -2  -4   1  280.38   11.61 
  -2   4  -1  295.28   12.15 
  -2  -4   1  268.15   12.25 
  -2  -4  -1  303.96   12.43 
   2  -4   1  310.07   12.21 
   2   4  -1  281.22   11.74 
  -2   4   1  266.61   11.16 
  -2  -4  -1  274.36   12.12 
   2   4   2  994.80   22.54 
  -2   4  -2  994.58   22.58 
   2   4  -2  999.09   21.98 
  -2  -4  -2 1001.72   21.81 
   2  -4   2 1012.59   22.89 
  -2   4   2  937.97   21.48 
  -2   4  -3   76.54    5.75 
   2  -4  -3   83.67    4.74 
   2   4  -3   78.54    4.67 
  -2   4   3   75.03    5.06 
  -2  -4  -3   76.77    4.38 
  -2   4  -4   92.12    5.51 
   2  -4  -4   83.05    4.73 
   2   4  -4   94.62    5.29 
  -2   4   4   85.16    5.06 
  -2  -4  -4   97.32    5.12 
  -2   4  -5  272.92   12.14 
  -2  -4  -5  264.34   11.01 
  -2  -4  -5  264.00   12.28 
   2   4  -5  278.56   12.15 
  -2   4  -6   30.34    4.45 
   2  -4  -6   29.69    3.42 
  -2  -4  -6   30.45    3.18 
   2   4  -6   33.69    3.28 
  -2  -4  -6   33.35    4.14 
   2  -4  -7  167.56    6.85 
   2   4  -7  148.69    6.84 
  -2  -4  -7  174.22    6.93 
   2  -4  -8   54.42    4.40 
   2   4  -8   53.76    4.57 
  -2  -4  -8   46.93    4.17 
   2  -4  -9   37.44    4.02 
   2   4  -9   33.22    3.61 
  -2  -4  -9   30.12    3.53 
  -2  -4  10   70.95    4.25 
   2  -4 -10   78.75    6.25 
  -2   4 -10   65.68    6.50 
   2  -4 -10   68.33    4.45 
  -2  -4  10   71.16    4.17 
  -2  -4 -10   74.13    5.73 
   2  -4  10   71.81    4.17 
   2   4 -10   71.57    5.71 
  -2  -4 -10   65.29    4.07 
  -2   4  10   69.90    4.12 
  -2   4  10   72.21    4.23 
  -2  -4 -10   70.72    4.58 
   2  -4 -11   46.45    2.53 
  -2  -4  11   53.71    2.52 
   2  -4 -11   52.99    4.49 
  -2  -4  11   53.21    2.41 
   2   4  11   48.77    2.65 
  -2  -4  11   53.08    2.87 
  -2  -4  11   52.24    2.66 
   2  -4  11   52.14    2.24 
   2   4 -11   46.80    4.96 
  -2  -4 -11   54.53    2.92 
  -2  -4 -11   58.34    4.85 
   2   4 -11   55.08    3.20 
  -2   4  11   49.62    2.39 
  -2   4  11   44.06    3.08 
  -2  -4 -11   48.50    2.53 
  -2   4  11   49.15    2.63 
  -2  -4  12   40.40    2.36 
  -2  -4  12   46.67    2.74 
   2  -4 -12   55.22    4.84 
  -2   4 -12   47.26    5.40 
   2  -4 -12   43.23    2.42 
  -2  -4  12   49.80    2.47 
  -2  -4  12   47.46    2.44 
   2  -4 -12   45.48    2.64 
   2   4  12   41.02    2.65 
  -2  -4 -12   42.72    2.73 
   2   4 -12   44.24    4.56 
   2  -4  12   44.91    2.21 
  -2  -4 -12   44.06    2.67 
  -2  -4 -12   49.08    4.13 
  -2  -4 -12   43.42    2.48 
  -2   4  12   47.29    2.65 
  -2  -4 -12   38.26    3.06 
  -2   4  12   43.52    3.13 
   2   4 -12   51.84    3.14 
  -2   4  12   46.51    2.53 
  -2   4 -13    9.19    4.12 
  -2  -4  13   13.23    1.89 
   2   4  13   14.63    1.50 
   2  -4 -13    6.42    4.17 
  -2   4 -13   13.37    4.64 
  -2  -4  13   12.80    1.62 
  -2  -4  13   13.95    1.60 
   2  -4 -13   16.23    2.20 
  -2  -4  13   11.39    1.35 
   2  -4  13   14.27    1.42 
  -2  -4 -13   13.47    2.31 
   2   4 -13   13.88    2.29 
  -2  -4 -13   13.83    1.51 
   2   4 -13   15.37    4.09 
  -2  -4 -13   16.24    3.62 
  -2   4  13   13.00    2.10 
  -2  -4 -13   12.35    2.50 
  -2   4  13   10.20    1.93 
  -2  -4 -13   14.58    1.81 
  -2   4  13   12.38    1.80 
  -2  -4  14   33.33    1.83 
  -2  -4  14   33.99    1.76 
   2  -4 -14   33.71    2.12 
   2  -4 -14   30.65    2.03 
  -2  -4  14   33.31    1.71 
   2   4  14   36.73    2.46 
   2  -4  14   35.21    2.23 
  -2  -4 -14   32.89    1.83 
   2   4 -14   32.61    2.47 
  -2  -4 -14   33.82    2.57 
  -2  -4 -14   36.79    2.62 
  -2   4  14   33.54    2.23 
  -2  -4 -14   30.63    2.82 
  -2   4  14   33.42    2.66 
  -2   4  14   34.52    2.12 
   2  -4 -15   12.62    2.08 
  -2  -4  15   14.77    1.51 
   2   4  15   12.03    1.95 
   2  -4 -15   10.80    1.83 
  -2  -4  15   11.77    1.92 
  -2   4 -15   11.02    2.88 
  -2  -4 -15   11.66    1.99 
  -2  -4 -15   13.71    2.22 
   2  -4  15   13.96    1.84 
   2   4 -15   11.89    2.35 
  -2   4  15   12.43    1.45 
  -2  -4 -15   10.91    2.17 
  -2   4  15   12.54    1.82 
   2  -4 -16   10.42    2.32 
  -2  -4  16    6.21    1.36 
   2   4  16    9.30    2.01 
   2  -4 -16    3.68    1.95 
  -2  -4  16    6.64    1.85 
  -2   4 -16   10.54    2.56 
  -2  -4 -16    8.16    2.00 
  -2  -4 -16    8.67    2.02 
   2  -4  16    7.10    1.31 
   2   4 -16    7.21    2.38 
  -2   4  16    6.48    1.85 
  -2  -4 -16    8.36    2.15 
  -2   4  16    6.94    1.81 
   2  -4 -17    2.03    1.99 
  -2  -4  17    2.39    1.47 
   2   4  17    3.36    1.86 
   2  -4 -17    4.24    2.04 
  -2  -4  17    0.89    1.60 
  -2   4 -17    0.97    2.82 
  -2  -4 -17    0.86    1.97 
  -2  -4 -17   -0.23    2.07 
   2  -4  17    2.29    1.59 
   2   4 -17    0.60    1.73 
  -2   4  17    1.92    1.28 
  -2  -4 -17    2.93    2.34 
  -2  -4  18    1.19    1.21 
  -2   4 -18    3.23    2.35 
   2  -4 -18    1.85    1.94 
  -2  -4  18   -0.53    1.48 
   2   4  18   -1.69    1.84 
  -2  -4 -18    1.02    2.31 
  -2   4  18    1.02    2.11 
  -2  -4 -18    1.77    2.03 
   2   4 -18    0.17    2.86 
  -2  -4  19   10.29    1.39 
   2  -4 -19   11.75    2.27 
  -2  -4  19   10.66    1.86 
   2   4  19   12.28    2.00 
  -2   4 -19   12.25    2.80 
   2  -4  19   10.49    1.72 
  -2   4  19   11.75    2.02 
   2   4 -19   12.43    2.41 
  -2  -4 -19   10.05    2.77 
  -2  -4  20   11.78    1.75 
   2  -4 -20   13.57    2.39 
  -2   4 -20   10.06    2.29 
  -2  -4  20   11.33    1.97 
  -2   4  20   14.47    2.02 
   2  -4  20   13.86    1.61 
   2   4 -20   11.54    2.38 
  -2  -5   0 1961.32   37.66 
   2  -5   0 1840.90   35.88 
   2   5   0 1856.50   42.14 
  -2   5   0 1896.75   37.27 
   2   5   0 1998.51   44.75 
   2  -5  -1  128.45    6.62 
  -2  -5   1  121.85    5.50 
  -2   5  -1  146.39    7.29 
  -2  -5  -1  135.36    6.53 
   2  -5   1  137.96    6.13 
  -2   5   1  132.25    6.62 
  -2  -5   2  134.05    6.60 
   2  -5  -2  127.91    5.81 
  -2   5  -2  136.09    6.52 
  -2  -5  -2  124.79    6.68 
  -2   5   2  143.26    6.70 
   2  -5   2  138.72    6.77 
   2  -5  -3  302.50   12.58 
  -2   5  -3  333.00   14.14 
   2   5  -3  299.30   12.34 
  -2  -5  -3  332.18   12.83 
   2  -5   3  286.91   11.71 
  -2   5   3  324.35   13.04 
  -2   5  -4  132.11    6.98 
   2  -5  -4  116.85    5.38 
   2   5  -4  113.67    5.51 
  -2   5   4  117.18    5.54 
  -2  -5  -4  115.23    5.41 
  -2   5  -5   85.53    5.05 
  -2   5  -5   81.23    5.72 
  -2  -5  -5   74.39    4.37 
  -2   5   5   81.88    4.72 
   2   5  -5   74.71    5.11 
  -2   5  -6   40.68    3.33 
  -2   5  -6   41.92    4.11 
   2  -5  -6   52.60    3.65 
  -2  -5  -6   43.72    3.72 
   2   5  -6   44.85    3.58 
  -2   5  -7   33.26    3.67 
  -2   5  -7   46.34    4.97 
   2  -5  -7   32.21    3.84 
  -2  -5  -7   38.20    3.53 
   2   5  -7   34.34    3.31 
  -2   5  -8  269.95   11.77 
  -2   5  -8  246.45   12.48 
   2  -5  -8  226.12   10.37 
  -2  -5  -8  231.14   10.70 
   2   5  -8  244.52   11.22 
  -2   5  -9    9.29    2.42 
   2  -5  -9    7.10    1.38 
   2  -5  -9    9.07    2.96 
  -2   5  -9    8.22    3.21 
  -2  -5   9    6.37    1.17 
  -2  -5   9    7.96    1.20 
  -2   5  -9    9.16    1.72 
  -2  -5  -9    8.84    3.02 
   2  -5   9    8.08    1.05 
   2   5  -9    8.35    3.98 
   2  -5   9    9.46    1.27 
  -2  -5  -9    6.92    1.17 
  -2   5   9    7.21    1.53 
  -2   5 -10   23.31    3.62 
  -2   5 -10   28.69    4.22 
  -2  -5  10   25.94    2.11 
   2  -5 -10   41.44    4.31 
  -2  -5  10   30.81    1.84 
   2  -5 -10   29.20    2.03 
  -2  -5  10   28.77    1.74 
  -2   5 -10   31.89    2.58 
  -2  -5  10   31.66    1.97 
   2  -5  10   29.84    1.53 
   2   5 -10   28.21    3.57 
  -2  -5 -10   31.70    2.04 
   2  -5  10   29.60    2.19 
   2   5 -10   28.80    2.30 
  -2  -5 -10   37.51    3.81 
  -2   5  10   33.08    2.25 
  -2   5  10   27.43    1.57 
  -2   5  10   28.86    2.57 
  -2  -5 -10   28.68    1.98 
  -2   5 -11    4.51    2.95 
  -2   5 -11    3.10    1.57 
  -2  -5  11    3.43    1.32 
   2  -5 -11    6.12    3.55 
  -2  -5  11    5.08    1.44 
   2  -5 -11    5.71    1.60 
  -2  -5  11    3.85    1.48 
   2  -5  11    2.19    1.15 
   2  -5  11    5.36    1.55 
  -2  -5 -11    4.05    2.76 
  -2  -5 -11    4.16    1.96 
   2   5 -11    6.74    2.00 
  -2   5  11    3.47    1.19 
   2   5 -11    2.89    3.41 
  -2   5  11    6.67    1.88 
  -2  -5 -11    3.63    1.39 
  -2  -5  12   39.92    2.26 
   2  -5 -12   41.03    5.02 
  -2  -5  12   41.19    2.28 
  -2  -5  12   43.60    2.45 
   2  -5 -12   45.38    2.18 
   2  -5 -12   38.33    2.31 
  -2  -5  12   37.76    2.69 
   2   5 -12   43.01    4.27 
   2  -5  12   43.30    2.67 
   2   5 -12   39.67    2.77 
  -2  -5 -12   45.18    2.07 
  -2  -5 -12   37.00    2.46 
  -2   5  12   39.29    2.39 
  -2   5  12   40.59    2.87 
   2  -5  12   41.48    2.11 
   2   5  13    6.32    1.73 
   2  -5 -13   12.56    3.47 
  -2   5 -13    0.00    4.71 
  -2  -5  13    7.19    1.52 
  -2  -5  13    8.07    1.15 
  -2  -5  13    7.81    1.80 
   2  -5 -13    8.61    1.91 
   2  -5 -13    8.24    1.63 
   2  -5 -13    5.25    1.94 
   2   5 -13    5.03    4.28 
   2   5 -13    8.38    2.12 
  -2  -5 -13    8.22    1.94 
  -2  -5 -13    8.67    1.88 
  -2  -5 -13    6.13    1.50 
   2  -5  13    6.33    1.44 
   2  -5  13    7.37    1.21 
  -2   5  13    3.46    1.58 
  -2  -5 -13   11.33    2.29 
  -2  -5  14   22.43    2.37 
  -2  -5  14   20.19    1.74 
   2  -5 -14   19.60    2.34 
   2  -5 -14   15.40    2.36 
  -2  -5  14   14.24    1.68 
   2   5  14   13.99    2.01 
   2  -5  14   13.47    1.55 
  -2  -5 -14   16.96    1.59 
   2   5 -14   15.14    1.96 
  -2  -5 -14   16.30    2.23 
  -2  -5 -14   19.36    2.83 
  -2   5  14   18.57    1.93 
  -2  -5 -14   12.40    2.54 
  -2  -5  15   76.60    3.74 
  -2  -5  15   66.89    2.88 
   2  -5 -15   74.46    3.79 
   2  -5 -15   70.13    3.98 
  -2  -5  15   67.39    3.20 
   2   5  15   70.36    3.89 
   2  -5  15   66.07    2.95 
  -2  -5 -15   68.52    3.08 
   2   5 -15   72.24    3.96 
  -2  -5 -15   65.37    3.70 
  -2  -5 -15   66.85    3.40 
  -2   5  15   71.64    3.49 
  -2  -5 -15   62.70    3.38 
   2  -5 -16   30.93    2.77 
  -2  -5  16   27.15    1.99 
   2  -5 -16   27.19    2.69 
  -2  -5  16   26.68    2.22 
   2   5  16   22.96    2.61 
  -2  -5 -16   25.66    2.54 
  -2  -5 -16   28.31    2.41 
   2  -5  16   24.77    1.95 
  -2   5  16   26.17    2.18 
   2   5 -16   21.44    3.09 
  -2  -5 -16   24.56    2.60 
   2  -5 -17    9.86    2.26 
  -2  -5  17   10.35    1.58 
   2  -5 -17    7.64    1.70 
  -2  -5  17    8.52    1.81 
   2   5  17    8.37    2.24 
  -2  -5 -17    6.47    2.19 
  -2  -5 -17    7.46    2.20 
   2  -5  17    6.86    1.44 
  -2   5  17    8.91    1.95 
   2   5 -17    8.56    3.08 
  -2  -5 -17    6.53    2.25 
  -2  -5  18    9.69    1.72 
  -2  -5  18    9.29    1.36 
   2  -5 -18    7.52    2.17 
   2  -5 -18    8.88    2.09 
   2  -5  18    9.41    1.65 
  -2  -5 -18    6.39    2.36 
  -2   5  18    8.09    1.63 
   2   5 -18    8.01    2.56 
  -2  -5  19    5.53    1.19 
   2  -5 -19    7.87    2.15 
  -2  -5  19    5.57    1.83 
   2  -5 -19    6.19    2.39 
  -2  -5 -19    4.00    2.27 
  -2   5  19    5.69    2.03 
   2   5 -19    6.79    2.68 
  -2  -5  20   20.84    1.81 
   2  -5 -20   19.92    2.69 
  -2  -5  20   21.07    2.26 
   2  -5 -20   19.07    2.37 
  -2  -5 -20   18.35    2.33 
  -2   5  20   20.18    2.22 
   2   5 -20   19.87    3.55 
  -2  -6   0  432.03   16.35 
   2  -6   0  413.42   16.05 
  -2   6   0  398.63   15.89 
   2  -6  -1  280.92   11.99 
  -2  -6   1  324.31   13.05 
  -2   6  -1  266.68   11.60 
  -2  -6  -1  299.20   12.08 
   2  -6   1  287.21   12.44 
  -2   6   1  317.95   13.55 
   2   6  -1  294.28   12.80 
   2  -6  -2  264.92   10.40 
  -2  -6   2  250.36   10.44 
  -2   6  -2  267.30   11.85 
  -2  -6  -2  247.72   10.44 
   2  -6   2  292.79   11.97 
   2   6  -2  286.31   12.46 
  -2  -6   3  288.15   12.06 
   2  -6  -3  292.38   11.73 
  -2   6  -3  310.32   13.14 
  -2  -6  -3  305.16   12.10 
  -2   6   3  298.31   12.14 
   2  -6   3  314.72   12.82 
   2  -6  -4   47.98    4.02 
  -2   6  -4   43.70    4.46 
   2   6  -4   44.97    3.71 
  -2  -6  -4   48.23    3.72 
   2  -6   4   59.04    4.67 
  -2   6   4   46.87    3.94 
   2  -6  -5   94.42    5.26 
  -2   6  -5   89.50    5.73 
   2   6  -5   82.06    4.70 
  -2  -6  -5   88.22    4.51 
   2  -6   5   89.20    5.48 
  -2   6   5  104.94    5.30 
  -2   6  -6   67.86    5.69 
  -2   6  -6   67.30    5.79 
   2  -6  -6   72.53    5.51 
  -2  -6  -6   73.37    5.65 
   2   6  -6   77.56    6.15 
  -2   6  -7   78.22    6.12 
  -2   6  -7   69.44    6.30 
   2  -6  -7   76.45    5.74 
  -2  -6  -7   74.17    5.78 
   2   6  -7   75.95    5.97 
  -2   6  -8   66.20    5.36 
   2  -6  -8   63.75    3.98 
  -2   6  -8   69.90    4.68 
   2  -6  -8   81.57    6.38 
  -2   6  -8   66.38    6.15 
  -2  -6   8   59.74    2.47 
  -2  -6   8   59.48    2.51 
  -2  -6  -8   67.56    5.49 
   2   6  -8   73.35    6.05 
   2  -6   8   61.33    3.85 
  -2  -6  -8   64.79    3.89 
   2  -6   8   60.29    3.66 
  -2   6  -9   77.98    5.10 
  -2   6  -9   74.18    3.88 
   2  -6  -9   72.27    4.95 
  -2   6  -9   97.48    6.94 
  -2  -6   9   73.10    3.30 
   2  -6  -9   76.80    3.47 
  -2  -6   9   79.09    3.45 
   2  -6   9   74.62    3.26 
   2  -6   9   80.79    3.57 
  -2  -6  -9   83.26    3.85 
  -2  -6  -9   76.09    3.97 
  -2   6   9   86.82    3.80 
  -2   6   9   78.67    3.55 
   2   6  -9   87.76    5.94 
  -2   6   9   80.67    4.22 
  -2   6 -10   43.70    5.22 
  -2  -6  10   43.84    2.63 
   2  -6 -10   38.46    4.15 
  -2   6 -10   36.80    5.52 
   2  -6 -10   47.59    2.54 
  -2  -6  10   46.31    2.37 
  -2  -6  10   46.44    2.19 
  -2   6 -10   39.48    2.84 
   2  -6  10   45.90    2.24 
   2  -6  10   41.54    2.42 
  -2  -6 -10   48.79    2.59 
  -2  -6 -10   46.17    2.56 
   2   6 -10   42.38    2.52 
   2   6 -10   43.72    4.01 
  -2   6  10   47.52    2.54 
  -2   6  10   43.55    2.27 
  -2   6  10   39.08    2.79 
  -2   6 -11   34.08    4.33 
  -2  -6  11   33.89    2.25 
   2  -6 -11   30.76    4.34 
  -2   6 -11   22.23    4.85 
   2  -6 -11   31.00    1.80 
  -2  -6  11   33.24    1.46 
  -2  -6  11   28.01    1.44 
   2  -6 -11   29.09    2.04 
  -2   6 -11   30.56    2.86 
   2   6 -11   29.42    2.32 
   2  -6  11   28.96    1.54 
  -2  -6 -11   25.92    1.56 
  -2  -6 -11   32.38    1.96 
   2   6 -11   31.28    4.64 
   2  -6  11   29.89    2.09 
  -2   6 -12   61.62    4.98 
  -2  -6  12   76.56    3.24 
  -2   6 -12   59.95    5.91 
  -2  -6  12   70.25    3.53 
   2  -6 -12   69.02    3.39 
   2  -6 -12   77.89    3.30 
   2  -6 -12   74.53    3.45 
  -2   6 -12   77.75    3.81 
   2   6 -12   74.13    3.63 
   2  -6  12   80.87    3.14 
   2   6 -12   58.83    5.56 
  -2  -6 -12   79.07    3.16 
  -2  -6 -12   76.61    3.63 
   2  -6  12   73.52    3.05 
  -2   6  12   75.80    3.36 
  -2  -6  13    0.39    1.07 
   2  -6 -13    2.19    1.69 
   2  -6 -13    4.32    1.86 
  -2  -6  13    2.62    1.46 
   2  -6 -13   -0.31    1.31 
  -2   6 -13    0.95    1.53 
   2  -6  13    2.77    1.24 
  -2  -6 -13   -0.33    1.02 
   2  -6  13    0.16    1.41 
  -2   6  13    0.22    1.17 
  -2  -6 -13   -2.07    1.82 
   2   6 -13   -1.43    1.84 
  -2  -6 -13   -0.09    2.27 
  -2  -6  14   51.59    2.62 
   2  -6 -14   39.82    2.78 
  -2  -6  14   44.22    2.53 
  -2  -6  14   45.42    2.49 
  -2   6 -14   49.11    3.80 
   2  -6 -14   42.74    2.57 
   2  -6  14   50.67    2.53 
   2  -6  14   53.28    3.09 
  -2  -6 -14   46.32    2.40 
  -2   6  14   49.23    2.77 
  -2  -6 -14   41.46    2.79 
   2   6 -14   47.45    3.47 
  -2  -6 -14   47.79    3.11 
  -2  -6  15   40.82    2.43 
   2  -6 -15   40.67    2.58 
  -2  -6  15   42.24    2.76 
  -2  -6  15   35.73    2.31 
  -2   6 -15   39.62    3.00 
   2  -6 -15   37.98    2.46 
   2  -6  15   38.13    2.01 
   2  -6  15   42.09    2.41 
  -2  -6 -15   39.40    2.30 
  -2   6  15   37.72    2.66 
  -2  -6 -15   39.30    3.15 
   2   6 -15   34.51    3.39 
  -2  -6 -15   36.43    3.09 
   2  -6 -16   28.05    2.28 
  -2  -6  16   21.81    1.62 
   2  -6 -16   27.74    2.47 
  -2  -6  16   24.43    2.10 
   2  -6 -16   21.20    2.99 
  -2   6 -16   25.41    3.06 
   2  -6  16   20.54    2.15 
   2  -6  16   23.11    1.48 
  -2   6  16   26.87    2.22 
   2   6 -16   21.84    2.95 
  -2  -6 -16   19.68    2.58 
  -2  -6 -16   20.68    2.34 
   2  -6 -17   13.87    2.16 
  -2  -6  17   11.12    1.31 
   2  -6 -17    8.52    2.15 
  -2  -6  17   10.82    1.77 
  -2   6 -17   13.03    2.42 
   2  -6  17   13.84    1.48 
   2  -6  17   11.82    1.52 
  -2   6  17   13.64    1.92 
  -2  -6 -17   11.73    2.09 
   2   6 -17   10.93    2.70 
  -2  -6 -17   11.16    2.14 
   2  -6 -18    6.07    2.03 
  -2  -6  18    4.75    1.39 
   2  -6 -18    4.39    2.43 
  -2  -6  18    7.50    2.03 
  -2   6 -18    5.88    2.66 
   2  -6  18    9.50    1.88 
   2  -6  18    4.66    1.65 
  -2   6  18    4.86    1.81 
  -2  -6 -18    5.07    2.33 
   2   6 -18    5.76    2.59 
  -2  -6 -18    2.98    2.42 
  -2  -6  19    6.86    1.30 
   2  -6 -19    5.72    2.31 
   2  -6 -19    5.29    2.11 
  -2  -6  19    6.24    2.16 
  -2   6 -19    7.96    2.09 
   2  -6  19    4.90    1.70 
  -2   6  19    8.78    1.91 
  -2  -6 -19    6.41    2.11 
   2   6 -19    5.67    2.93 
  -2   6 -20    2.16    2.40 
   2  -6 -20   -0.44    2.37 
  -2  -6 -20    1.14    2.54 
   2  -6  20   -0.33    2.73 
  -2  -7   0   19.12    2.70 
   2  -7   0   29.24    3.57 
  -2   7   0   22.12    2.85 
   2  -7  -1  308.86   11.85 
  -2  -7   1  295.13   11.91 
  -2   7  -1  304.83   12.69 
  -2  -7  -1  288.85   11.49 
  -2   7   1  284.66   11.75 
   2  -7  -2  401.16   15.19 
  -2  -7   2  352.99   13.76 
  -2   7  -2  406.28   16.79 
   2  -7   2  419.70   16.31 
  -2   7   2  363.40    9.70 
   2  -7  -3   29.27    3.08 
  -2   7  -3   35.31    4.41 
  -2  -7   3   37.44    3.72 
  -2   7   3   36.03    3.74 
   2  -7   3   31.87    4.02 
   2   7  -3   37.68    4.69 
   2  -7  -4   89.03    6.35 
  -2   7  -4   97.70    7.45 
  -2  -7   4   93.48    6.90 
  -2   7   4   80.91    6.25 
   2  -7   4   92.64    6.99 
   2   7  -4   87.70    7.28 
   2  -7  -5   19.94    3.33 
  -2   7  -5   19.22    3.09 
  -2  -7   5   16.61    3.15 
  -2   7   5   15.31    2.90 
   2  -7   5   22.13    3.95 
  -2   7  -6  272.53   12.45 
   2  -7  -6  273.27   11.99 
   2  -7   6  292.74   13.22 
   2   7  -6  258.40   11.76 
  -2   7  -7    5.76    2.80 
   2  -7  -7   12.53    3.56 
   2  -7  -7    7.38    1.10 
  -2  -7   7    8.40    1.22 
  -2  -7   7    7.79    1.28 
  -2   7  -7    7.05    2.04 
   2   7  -7    6.73    3.18 
   2  -7   7    5.67    3.12 
   2  -7   7   11.35    1.50 
  -2  -7  -7   10.34    1.69 
  -2   7   7    7.84    1.60 
   2  -7  -8   68.13    3.28 
   2  -7  -8   71.08    5.41 
  -2  -7   8   62.76    2.03 
  -2   7  -8   67.46    6.52 
  -2   7  -8   66.63    3.03 
   2  -7   8   69.15    5.66 
   2   7  -8   67.25    5.13 
   2  -7   8   68.37    3.42 
  -2  -7  -8   67.40    3.41 
  -2   7   8   70.43    3.22 
   2  -7   8   65.50    1.87 
  -2   7   8   73.73    4.15 
  -2   7  -9    6.19    2.57 
   2  -7  -9    8.96    3.35 
  -2   7  -9   13.32    3.29 
  -2  -7   9   11.17    1.20 
   2  -7  -9    6.79    1.79 
  -2  -7   9    8.16    1.50 
  -2   7  -9    9.47    2.13 
   2   7  -9   11.80    3.45 
   2  -7   9    8.86    1.25 
   2  -7   9    9.70    1.41 
  -2   7   9    8.17    1.33 
  -2   7   9   10.55    1.60 
  -2  -7  -9    9.65    1.77 
  -2   7   9   10.53    2.27 
  -2   7 -10   47.63    5.13 
   2  -7 -10   44.72    4.39 
  -2   7 -10   44.52    5.21 
  -2  -7  10   45.47    2.44 
   2  -7 -10   44.29    2.56 
  -2  -7  10   45.07    2.21 
  -2   7 -10   47.52    3.34 
   2   7 -10   39.70    5.23 
   2  -7  10   45.48    2.31 
   2  -7  10   41.91    2.54 
  -2  -7 -10   43.24    2.78 
  -2   7  10   45.32    2.35 
  -2  -7 -10   44.30    2.34 
  -2   7 -11    9.62    4.07 
   2  -7 -11    9.62    2.64 
  -2   7 -11    9.09    4.34 
   2  -7 -11   16.07    1.53 
  -2  -7  11   14.45    1.52 
   2  -7 -11   16.94    1.59 
   2  -7 -11   16.21    1.97 
  -2  -7  11   13.12    1.69 
  -2  -7  11   13.84    1.45 
  -2   7 -11   13.45    2.28 
   2  -7  11   14.08    1.34 
  -2  -7 -11   15.76    2.14 
   2  -7  11   16.75    1.70 
  -2   7  11   12.91    1.91 
  -2  -7 -11   13.28    1.96 
   2   7 -11   13.84    2.67 
   2  -7 -12   12.19    1.51 
  -2  -7  12   11.92    1.42 
   2  -7 -12   12.97    1.89 
   2  -7 -12   13.40    1.86 
  -2  -7  12   14.62    1.74 
  -2  -7  12   14.39    1.34 
  -2   7 -12   14.00    2.43 
   2  -7  12   14.66    1.36 
  -2  -7 -12   13.86    1.85 
   2  -7  12   12.82    1.97 
  -2   7  12   16.21    1.89 
  -2  -7 -12   15.03    1.97 
   2   7 -12   11.61    2.57 
  -2  -7  13   17.44    1.98 
   2  -7 -13   19.30    2.19 
   2  -7 -13   17.84    1.90 
  -2  -7  13   20.45    2.14 
   2  -7 -13   20.62    2.14 
  -2   7 -13   16.10    2.87 
   2  -7  13   20.24    1.67 
  -2  -7 -13   17.81    2.02 
   2  -7  13   13.80    1.94 
  -2   7  13   15.98    2.13 
  -2  -7 -13   15.23    2.06 
   2   7 -13   18.58    3.01 
  -2  -7 -13   16.07    2.19 
  -2  -7  14    0.55    1.43 
   2  -7 -14    1.21    1.92 
  -2   7 -14   -0.64    2.35 
  -2  -7  14    4.74    1.44 
   2  -7 -14   -0.32    1.98 
   2  -7  14   -0.29    1.76 
  -2  -7 -14    0.66    1.56 
   2  -7  14    0.45    1.27 
  -2   7  14    1.16    1.76 
  -2  -7 -14    2.05    2.16 
   2   7 -14    0.29    2.24 
  -2  -7 -14    1.27    1.80 
  -2  -7  15    1.39    1.67 
   2  -7 -15   -1.67    1.36 
  -2   7 -15   -0.94    2.44 
  -2  -7  15   -2.24    1.33 
   2  -7 -15    0.38    2.09 
   2  -7  15    1.47    1.59 
  -2  -7 -15    2.72    1.53 
   2  -7  15   -0.58    1.22 
  -2   7  15    0.08    1.80 
  -2  -7 -15   -0.98    1.76 
   2   7 -15    0.44    2.39 
  -2  -7 -15    3.42    2.48 
  -2  -7  16    6.79    1.39 
   2  -7 -16    9.57    2.68 
   2  -7 -16    5.90    2.24 
  -2  -7  16    7.52    1.91 
   2  -7 -16    7.23    2.36 
  -2   7 -16    4.09    2.63 
   2  -7  16    4.39    1.74 
  -2   7  16    4.07    1.81 
   2   7 -16    9.58    2.50 
  -2  -7 -16    5.45    2.46 
  -2  -7 -16    8.05    2.03 
   2  -7 -17    5.06    2.08 
  -2  -7  17    5.69    1.44 
   2  -7 -17    5.26    1.89 
  -2  -7  17    6.32    1.49 
  -2   7 -17    3.95    2.94 
   2  -7  17    4.04    1.58 
   2  -7  17    4.74    1.28 
  -2   7  17    5.78    1.60 
  -2  -7 -17    3.32    2.09 
   2   7 -17    4.51    2.62 
  -2  -7 -17    3.48    2.11 
   2  -7 -18   12.46    1.95 
  -2  -7  18   14.30    1.36 
   2  -7 -18   16.61    2.29 
  -2  -7  18   14.77    1.93 
  -2   7 -18   15.83    2.56 
   2  -7  18   10.85    1.77 
   2  -7  18   12.90    1.62 
  -2   7  18   14.64    1.92 
  -2  -7 -18   12.67    2.38 
   2   7 -18   12.95    2.69 
  -2  -7 -18   12.55    2.30 
  -2  -7  19    6.66    1.39 
   2  -7 -19    7.18    2.24 
  -2   7 -19    5.99    2.19 
   2  -7 -19    5.40    2.54 
   2  -7  19    6.68    1.79 
  -2   7  19    5.14    2.10 
  -2  -7 -19    5.83    2.47 
   2  -8   0   64.17    5.34 
  -2   8   0   72.87    6.10 
   2  -8  -1  382.20   15.85 
  -2   8  -1  378.43   15.87 
   2  -8   1  425.60   17.19 
  -2   8   1  372.59   16.07 
   2  -8  -2   56.01    4.58 
  -2   8  -2   51.75    4.80 
   2  -8   2   52.36    4.57 
  -2   8   2   54.18    4.50 
   2  -8  -3  198.04    9.17 
  -2   8  -3  189.92    9.71 
  -2   8   3  177.74    8.77 
   2  -8  -4   13.51    3.17 
  -2   8  -4    6.81    3.67 
   2  -8   4   10.39    3.93 
   2  -8  -5  111.94    7.64 
  -2   8  -5  108.48    8.28 
  -2   8  -5  102.21    5.95 
  -2  -8   5  104.62    5.85 
   2  -8   5  116.09    6.13 
   2  -8   5   93.10    5.42 
   2  -8   5   88.47    4.97 
   2  -8  -6  132.83    7.51 
  -2  -8   6  140.56    5.48 
  -2   8  -6  127.04    7.74 
  -2  -8   6  124.34    5.33 
   2  -8  -6  122.49    5.13 
  -2   8  -6  144.58    6.01 
   2  -8   6  119.64    4.73 
   2  -8   6  139.34    5.58 
  -2  -8  -6  132.37    5.52 
  -2   8   6  135.71    5.76 
   2  -8   6  115.85    7.15 
  -2   8   6  116.82    5.52 
   2  -8  -7    3.28    2.91 
  -2   8  -7   13.35    3.93 
   2  -8  -7    9.78    1.69 
  -2  -8   7    8.12    1.39 
  -2  -8   7    7.63    1.24 
  -2   8  -7    9.05    2.11 
   2  -8   7    6.91    3.56 
   2  -8   7    8.81    1.26 
   2   8  -7   12.77    4.23 
   2  -8   7    8.00    1.53 
  -2  -8  -7    5.73    1.68 
  -2   8   7    8.80    1.73 
  -2   8   7    9.28    2.53 
   2  -8  -8  219.10    9.31 
   2  -8  -8  229.86    7.50 
  -2   8  -8  211.37    9.56 
  -2  -8   8  221.92    6.97 
  -2  -8   8  228.68    7.40 
  -2   8  -8  236.82    8.35 
   2  -8   8  232.04   10.30 
   2  -8   8  224.38    7.52 
  -2  -8  -8  240.39    8.21 
  -2   8   8  227.19    7.51 
  -2   8   8  216.10    8.16 
   2  -8  -9    2.81    3.01 
   2  -8  -9   -0.22    0.99 
  -2   8  -9    1.51    3.31 
  -2  -8   9    1.93    1.19 
   2  -8  -9   -1.13    1.41 
  -2   8  -9   -0.57    2.31 
   2   8  -9   -1.78    4.03 
   2  -8   9   -0.71    1.47 
  -2  -8  -9    1.34    1.55 
  -2   8   9   -1.14    1.52 
   2  -8   9   -0.53    3.83 
   2  -8 -10   19.63    3.57 
  -2   8 -10   23.38    2.86 
  -2   8 -10   11.32    3.93 
   2  -8 -10   12.88    1.53 
  -2  -8  10   18.10    1.43 
   2  -8 -10   16.79    1.44 
  -2  -8  10   15.85    1.60 
   2  -8 -10   18.58    2.04 
   2  -8  10   19.05    1.28 
   2  -8  10   18.25    1.86 
   2   8 -10   18.91    4.77 
  -2  -8 -10   14.92    1.44 
  -2   8  10   20.86    2.03 
   2  -8  10   18.62    4.85 
  -2  -8  11   67.31    3.01 
   2  -8 -11   62.75    3.18 
  -2  -8  11   65.89    3.00 
   2  -8 -11   59.52    2.77 
  -2   8 -11   57.24    3.76 
   2  -8 -11   57.56    3.29 
   2  -8  11   62.15    2.89 
   2  -8  11   63.27    3.13 
  -2  -8 -11   66.06    3.12 
  -2   8  11   65.68    3.44 
  -2  -8 -11   61.21    3.41 
   2  -8 -12    3.57    1.45 
  -2  -8  12    9.68    1.41 
   2  -8 -12    2.87    1.75 
   2  -8 -12    4.12    2.06 
  -2  -8  12    6.46    1.71 
  -2  -8  12    6.77    1.58 
  -2   8 -12    3.05    2.44 
   2  -8  12    6.65    1.42 
  -2  -8 -12    5.67    1.92 
   2  -8  12    5.08    1.69 
  -2   8  12    6.70    1.65 
  -2  -8 -12    6.16    1.86 
   2   8 -12    4.93    2.59 
  -2  -8  13  134.79    5.26 
   2  -8 -13  130.04    5.42 
  -2  -8  13  132.72    5.48 
  -2  -8  13  125.52    4.89 
  -2   8 -13  116.78    5.69 
   2  -8 -13  129.59    5.61 
   2  -8  13  128.20    4.97 
   2  -8  13  134.89    5.43 
  -2  -8 -13  133.59    5.33 
  -2   8  13  123.92    5.09 
  -2  -8 -13  130.89    5.79 
   2   8 -13  117.26    5.65 
  -2  -8 -13  133.51    5.96 
  -2  -8  14    6.05    1.35 
   2  -8 -14    7.01    1.95 
  -2  -8  14    4.93    1.57 
  -2  -8  14    6.00    1.38 
  -2   8 -14    8.07    2.54 
   2  -8 -14    3.51    2.54 
   2  -8  14    5.99    1.34 
   2  -8  14    7.78    2.00 
  -2  -8 -14    4.66    1.58 
  -2   8  14    6.06    1.86 
  -2  -8 -14    8.66    2.20 
   2   8 -14    4.59    2.29 
  -2  -8 -14    0.25    2.32 
   2  -8 -15    1.40    2.47 
   2  -8 -15   -0.92    2.02 
  -2   8 -15   -2.68    2.63 
  -2  -8  15   -1.14    1.84 
  -2  -8 -15    3.00    1.42 
  -2  -8 -15   -0.17    2.15 
   2  -8  15    2.57    1.43 
  -2   8  15   -1.73    1.64 
   2  -8  15    1.63    1.56 
   2   8 -15   -0.26    2.33 
  -2  -8 -15   -2.82    1.92 
  -2  -8  16   31.95    2.14 
   2  -8 -16   31.29    2.43 
   2  -8 -16   31.22    2.21 
   2  -8 -16   28.55    2.89 
  -2   8 -16   32.64    2.81 
   2  -8  16   34.75    1.91 
   2  -8  16   30.20    2.25 
  -2   8  16   31.63    2.27 
   2   8 -16   28.93    3.25 
  -2  -8 -16   26.74    2.60 
  -2  -8 -16   32.44    2.94 
  -2  -8  17    3.24    1.24 
   2  -8 -17    2.86    2.32 
   2  -8 -17    3.44    2.47 
   2  -8 -17    3.05    1.97 
  -2   8 -17    4.51    2.92 
   2  -8  17    4.35    1.19 
   2  -8  17    5.72    1.74 
  -2   8  17    2.34    1.78 
   2   8 -17    5.99    2.49 
  -2  -8 -17    5.37    1.95 
  -2  -8 -17    4.08    2.23 
  -2  -8  18    2.58    1.36 
   2  -8 -18    1.59    2.30 
  -2   8 -18    2.60    1.99 
   2  -8 -18    2.18    2.44 
   2  -8  18    3.46    1.72 
  -2   8  18    0.62    1.89 
  -2  -8 -18    0.32    2.84 
  -2  -8 -18    2.44    2.09 
  -2   8 -19   -1.74    2.36 
   2  -8  19   -0.64    2.39 
   2  -9   0   82.48    6.37 
  -2  -9   0   85.69    5.17 
   2  -9  -1    5.65    2.27 
  -2   9  -1    5.49    2.42 
  -2  -9   1    8.32    1.67 
   2  -9   1    3.31    2.19 
   2  -9  -2  203.17    9.58 
  -2   9  -2  211.15    8.21 
  -2   9  -2  210.49   11.29 
   2  -9  -2  196.07    7.50 
  -2  -9   2  183.51    7.40 
   2  -9   2  189.09    7.24 
  -2   9   2  207.51    8.00 
   2  -9   2  209.58    9.66 
   2  -9  -3   65.50    4.39 
   2  -9  -3   58.81    2.81 
  -2   9  -3   59.02    4.97 
  -2  -9   3   59.27    2.44 
  -2   9  -3   60.85    3.19 
   2  -9   3   54.78    4.56 
   2  -9   3   58.11    2.57 
  -2   9   3   58.54    2.83 
   2  -9   3   57.68    2.69 
  -2   9   3   54.40    3.48 
   2  -9  -4   85.15    5.71 
   2  -9  -4   83.42    3.89 
  -2   9  -4   97.36    6.74 
  -2   9  -4   91.75    4.32 
   2  -9  -4   84.17    3.77 
  -2  -9   4   87.93    3.76 
   2  -9   4   94.64    4.15 
   2  -9   4   82.99    6.08 
  -2   9   4   88.86    4.15 
   2  -9   4   89.53    3.83 
  -2   9   4   95.14    4.89 
   2  -9  -5   25.76    3.81 
  -2  -9   5   29.32    1.44 
  -2   9  -5   33.68    4.15 
  -2  -9   5   28.26    1.60 
   2  -9  -5   33.05    1.91 
   2  -9  -5   29.45    2.10 
  -2   9  -5   31.63    2.06 
   2  -9   5   28.24    1.79 
   2  -9   5   26.43    1.62 
   2  -9   5   32.67    3.30 
  -2  -9  -5   26.43    3.57 
  -2   9   5   28.58    2.02 
  -2   9   5   27.67    2.47 
   2  -9  -6   41.07    3.59 
   2  -9  -6   43.60    2.76 
  -2   9  -6   45.85    5.36 
  -2  -9   6   35.87    1.75 
   2  -9  -6   44.17    2.36 
  -2   9  -6   40.24    2.64 
   2  -9   6   40.35    1.78 
   2  -9   6   44.65    2.19 
  -2  -9  -6   39.89    1.93 
  -2   9   6   46.41    2.67 
   2  -9   6   38.77    3.61 
  -2   9   6   36.71    3.44 
   2  -9  -7  141.78    7.34 
  -2  -9   7  135.56    5.09 
  -2   9  -7  142.04    8.36 
  -2   9  -7  140.03    5.65 
   2  -9  -7  138.65    5.23 
  -2  -9   7  136.59    4.92 
   2  -9   7  130.20    7.35 
  -2  -9  -7  136.10    5.34 
  -2   9   7  139.53    5.24 
   2  -9   7  130.92    4.73 
  -2   9   7  139.48    5.70 
   2  -9  -8   48.13    4.02 
  -2  -9   8   47.96    2.09 
  -2   9  -8   48.68    4.98 
  -2  -9   8   46.69    1.78 
   2  -9  -8   46.75    2.13 
   2  -9  -8   40.96    2.61 
  -2   9  -8   48.25    2.75 
   2  -9   8   45.64    1.68 
   2  -9   8   47.82    2.01 
   2  -9   8   47.06    4.52 
  -2  -9  -8   43.79    2.74 
  -2   9   8   45.03    2.27 
   2  -9  -9   33.86    5.01 
   2  -9  -9   40.60    2.41 
  -2   9  -9   37.66    5.63 
  -2  -9   9   38.82    2.23 
   2  -9  -9   42.38    2.36 
  -2  -9   9   35.28    2.02 
  -2   9  -9   43.20    3.02 
   2  -9   9   38.94    2.44 
  -2  -9  -9   39.64    2.67 
  -2   9   9   40.33    2.24 
   2  -9   9   45.66    5.13 
  -2  -9  10   27.75    1.58 
   2  -9 -10   22.79    1.88 
   2  -9 -10   24.85    1.90 
  -2   9 -10   21.16    1.95 
   2  -9  10   28.01    1.91 
  -2  -9 -10   21.50    1.93 
  -2   9  10   26.95    1.98 
  -2  -9  11   13.71    1.64 
   2  -9 -11   13.29    2.13 
  -2  -9  11   15.06    1.40 
   2  -9 -11   12.88    1.58 
  -2   9 -11   11.93    2.48 
   2  -9  11   15.46    1.52 
   2  -9  11   10.87    1.99 
  -2  -9 -11   13.15    1.82 
  -2   9  11   17.51    1.87 
  -2  -9  12   43.06    2.49 
   2  -9 -12   45.34    2.83 
  -2  -9  12   49.68    2.82 
  -2   9 -12   41.09    3.32 
   2  -9  12   45.87    2.42 
   2  -9  12   44.13    2.63 
  -2  -9 -12   45.01    2.67 
  -2   9  12   38.25    2.42 
   2  -9 -13   11.50    2.10 
  -2  -9  13   10.26    1.28 
   2  -9 -13   10.16    2.17 
  -2  -9  13    9.72    1.57 
  -2   9 -13    9.21    2.51 
   2  -9  13    8.32    1.88 
   2  -9  13   10.22    1.38 
  -2   9  13   11.88    2.05 
  -2  -9 -13    6.58    1.60 
  -2  -9 -13   12.26    2.68 
   2  -9 -14   37.32    2.92 
  -2  -9  14   41.15    2.12 
   2  -9 -14   37.20    2.68 
  -2   9 -14   42.29    3.12 
   2  -9  14   38.09    2.54 
  -2  -9 -14   35.61    2.24 
   2  -9  14   38.95    2.26 
  -2   9  14   37.98    2.63 
  -2  -9 -14   32.29    3.07 
  -2  -9 -14   38.08    3.44 
   2  -9 -15    1.40    2.49 
  -2  -9  15    6.87    1.32 
   2  -9 -15    0.85    2.13 
  -2   9 -15    1.61    2.35 
   2  -9  15    5.13    1.91 
  -2  -9 -15    2.80    1.21 
   2  -9  15    4.87    1.41 
  -2   9  15    0.27    1.78 
  -2  -9 -15    4.91    2.58 
  -2  -9 -15    0.41    2.42 
  -2   9 -16    8.53    2.23 
   2  -9 -16    8.86    2.02 
   2  -9 -16    5.83    2.70 
   2  -9 -16    5.23    2.45 
  -2  -9 -16    7.40    2.61 
  -2   9  16    6.69    2.02 
   2  -9  16    6.18    1.36 
  -2  -9 -16    4.99    2.12 
   2  -9  16    3.69    1.57 
   2  -9 -17   17.27    2.67 
   2  -9 -17   13.06    2.87 
  -2   9 -17   19.63    2.75 
   2  -9  17   20.08    1.87 
  -2  -9 -17   19.78    2.53 
  -2   9  17   22.34    2.51 
  -2  -9  18    0.43    1.40 
  -2  -9  18   -0.04    1.65 
  -2   9 -18    0.13    2.33 
   2  -9  18    0.42    1.72 
   2 -10   0   21.74    3.25 
   2 -10   0   18.90    1.62 
   2 -10   0   17.30    2.15 
  -2  10   0   15.56    1.79 
   2 -10  -1  180.79    8.01 
   2 -10  -1  173.66    6.12 
   2 -10  -1  167.72    5.79 
  -2 -10   1  196.12    6.77 
  -2  10  -1  177.20    6.22 
   2 -10   1  160.60    5.45 
   2 -10   1  197.33    8.43 
   2 -10   1  167.78    6.34 
  -2  10   1  181.76    6.71 
   2 -10  -2   53.23    4.89 
   2 -10  -2   53.91    2.97 
   2 -10  -2   53.26    2.65 
  -2 -10   2   56.27    3.13 
  -2  10  -2   56.80    3.13 
   2 -10   2   54.54    2.72 
   2 -10   2   68.14    5.11 
   2 -10   2   58.46    2.92 
  -2  10   2   58.52    3.26 
  -2  10   2   55.21    3.59 
   2 -10  -3   16.26    3.12 
  -2 -10   3    7.63    1.55 
   2 -10  -3    9.57    1.46 
  -2 -10   3   11.02    1.55 
   2 -10  -3    7.04    1.75 
  -2  10  -3    7.11    1.96 
   2 -10   3    8.15    2.72 
   2 -10   3    6.97    1.42 
  -2  10   3   10.24    1.44 
  -2  10   3   10.85    2.26 
   2 -10  -4   50.62    4.34 
  -2 -10   4   55.04    2.68 
   2 -10  -4   50.15    2.63 
   2 -10  -4   48.56    2.78 
  -2  10  -4   55.91    3.17 
   2 -10   4   54.30    4.91 
   2 -10   4   53.28    2.76 
   2 -10   4   52.88    2.54 
  -2 -10  -4   48.30    2.71 
  -2  10   4   48.24    2.75 
  -2  10   4   51.08    3.59 
   2 -10  -5  307.58   12.78 
   2 -10  -5  336.81   11.25 
  -2 -10   5  342.26   11.26 
  -2 -10   5  329.40   10.79 
   2 -10  -5  311.99   10.69 
  -2  10  -5  349.22   12.02 
   2 -10   5  313.03   12.91 
   2 -10   5  343.92   11.33 
  -2 -10  -5  337.31   11.23 
  -2  10   5  338.97   11.77 
  -2  10   5  314.62   11.16 
   2 -10  -6  131.39    9.15 
   2 -10  -6  140.17    4.94 
  -2 -10   6  133.68    4.50 
   2 -10  -6  135.79    4.76 
  -2 -10   6  151.04    4.99 
  -2  10  -6  146.01    5.67 
   2 -10   6  150.57    4.99 
   2 -10   6  141.71    4.86 
  -2 -10  -6  144.32    4.94 
  -2  10   6  145.35    5.39 
   2 -10   6  125.96    8.26 
  -2  10   6  132.60    5.27 
   2 -10  -7  138.39    7.08 
  -2 -10   7  128.67    4.61 
   2 -10  -7  134.03    4.85 
  -2 -10   7  138.96    5.00 
   2 -10  -7  124.35    4.75 
  -2  10  -7  131.12    5.23 
   2 -10   7  141.23    5.01 
   2 -10   7  131.54    4.96 
  -2 -10  -7  121.90    4.54 
  -2  10   7  122.59    4.61 
  -2  10   7  140.69    6.14 
   2 -10  -8   11.86    3.39 
   2 -10  -8   15.84    2.02 
  -2 -10   8   16.23    1.39 
   2 -10  -8   18.71    1.98 
  -2 -10   8   22.11    1.89 
  -2  10  -8   23.52    2.57 
   2 -10   8   21.80    1.72 
   2 -10   8   20.68    1.90 
  -2 -10  -8   21.86    1.68 
  -2  10   8   18.59    1.88 
   2 -10   8   17.46    4.25 
  -2 -10   9   29.05    1.82 
   2 -10  -9   30.95    2.41 
  -2 -10   9   30.30    2.16 
   2 -10  -9   28.40    2.19 
  -2  10  -9   30.24    2.86 
   2 -10   9   33.74    2.06 
   2 -10   9   27.73    2.25 
  -2 -10  -9   31.88    2.39 
  -2  10   9   34.07    2.16 
  -2 -10  10   39.07    1.99 
   2 -10 -10   32.14    2.29 
  -2 -10  10   34.27    2.36 
   2 -10 -10   34.92    2.30 
  -2  10 -10   32.40    2.77 
   2 -10  10   39.02    2.63 
  -2 -10 -10   39.00    2.68 
  -2  10  10   40.92    2.52 
  -2 -10  11   29.60    2.05 
   2 -10 -11   28.74    2.36 
  -2  10 -11   30.42    2.90 
  -2 -10 -11   30.48    2.26 
  -2  10  11   29.77    2.37 
   2 -10  11   32.68    2.27 
  -2 -10  12   12.05    1.47 
   2 -10 -12   10.54    1.96 
  -2 -10  12   12.62    1.64 
  -2  10 -12   10.87    2.52 
   2 -10  12    9.91    1.90 
  -2 -10 -12   10.86    1.29 
  -2  10  12   11.98    1.93 
  -2  10 -13   15.35    2.79 
  -2 -10  13   14.01    1.42 
   2 -10 -13   14.86    2.07 
   2 -10  13   14.02    1.97 
  -2 -10 -13   15.21    1.76 
  -2  10  13   13.90    1.94 
   2 -10  13   16.82    1.41 
  -2  10 -14   -2.72    2.04 
  -2 -10  14    0.43    1.34 
   2 -10 -14    1.51    1.79 
   2 -10  14   -1.38    1.74 
  -2 -10 -14    0.07    1.65 
  -2  10  14    3.49    1.73 
   2 -10  14    1.22    1.05 
  -2 -10 -14   -1.48    2.41 
  -2  10 -15    2.27    2.27 
  -2 -10  15   -0.80    1.27 
   2 -10 -15    0.92    2.13 
   2 -10  15    1.90    1.65 
  -2 -10 -15    1.12    1.55 
  -2  10  15   -1.23    2.17 
   2 -10  15   -0.62    1.58 
  -2 -10 -15    1.64    2.31 
  -2 -10  16    9.23    1.34 
   2 -10 -16   10.51    2.48 
   2 -10 -16    9.51    2.52 
  -2  10 -16    7.53    2.04 
   2 -10  16   10.21    1.81 
  -2 -10 -16    6.57    2.30 
  -2  10  16    9.32    2.38 
  -2 -10  17    4.47    1.23 
  -2 -10  17    4.28    2.58 
  -2  10 -17    4.71    2.32 
   2 -10 -17    3.20    2.11 
   2 -10  17    4.18    1.79 
  -2 -10 -17    4.29    2.29 
   2 -11   0    7.89    3.22 
   2 -11   0    3.96    1.42 
   2 -11   0    2.54    1.50 
  -2  11   0    5.74    1.44 
   2 -11  -1  152.59    8.08 
  -2  11  -1  171.52    5.98 
   2 -11  -1  168.58    5.56 
   2 -11  -1  174.19    5.87 
   2 -11   1  179.18    5.82 
   2 -11   1  176.81    5.92 
  -2  11   1  168.73    5.75 
   2 -11   1  159.54    8.50 
   2 -11  -2  119.30    6.41 
   2 -11  -2  117.92    4.26 
   2 -11  -2  128.78    4.54 
  -2 -11   2  114.90    4.24 
  -2  11  -2  129.72    4.86 
   2 -11   2  122.94    4.25 
   2 -11   2  128.47    6.43 
   2 -11   2  134.49    4.98 
  -2  11   2  122.91    4.90 
  -2  11   2  133.05    5.49 
   2 -11  -3   42.62    4.71 
  -2 -11   3   54.22    3.21 
   2 -11  -3   57.55    2.77 
   2 -11  -3   53.57    2.93 
  -2 -11   3   51.81    2.56 
  -2  11  -3   47.74    2.57 
  -2 -11  -3   50.41    2.78 
   2 -11   3   59.29    2.63 
   2 -11   3   48.73    2.70 
  -2  11   3   52.80    2.57 
   2 -11   3   47.70    3.79 
  -2  11   3   56.16    3.51 
   2 -11  -4    8.31    2.85 
  -2 -11   4   11.64    2.09 
   2 -11  -4    8.09    1.49 
  -2  11  -4    9.06    1.89 
  -2 -11   4    5.53    1.50 
   2 -11  -4    6.22    1.72 
  -2 -11  -4    5.22    1.41 
   2 -11   4    7.97    3.88 
  -2  11   4    6.37    1.70 
   2 -11   4    8.57    1.55 
  -2  11   4    4.10    2.85 
  -2 -11   5   80.87    4.12 
   2 -11  -5   83.86    3.48 
  -2  11  -5   85.12    4.09 
  -2 -11   5   72.60    2.96 
   2 -11  -5   80.74    3.79 
  -2 -11  -5   90.92    3.85 
   2 -11   5   82.79    5.84 
  -2  11   5   82.79    3.90 
   2 -11   5   78.48    3.44 
  -2  11   5   71.40    4.00 
  -2 -11   6  130.04    4.76 
   2 -11  -6  135.38    5.23 
  -2 -11   6  135.74    5.59 
   2 -11  -6  142.18    5.54 
  -2  11  -6  142.42    5.90 
   2 -11   6  142.25    5.39 
   2 -11   6  138.66    5.33 
  -2 -11  -6  146.04    5.87 
  -2  11   6  137.19    5.46 
  -2  11   6  145.59    6.87 
  -2 -11   7   12.96    1.48 
   2 -11  -7   11.22    1.87 
  -2 -11   7   12.02    1.34 
   2 -11  -7   13.14    1.87 
  -2  11  -7   10.02    2.00 
   2 -11   7   11.67    1.52 
   2 -11   7   14.52    1.92 
  -2 -11  -7   13.55    2.14 
  -2  11   7   11.94    1.82 
  -2 -11   8   44.28    2.35 
   2 -11  -8   46.19    2.71 
  -2 -11   8   42.50    2.44 
   2 -11  -8   43.90    2.43 
  -2  11  -8   47.63    2.93 
   2 -11   8   43.52    2.30 
   2 -11   8   49.42    2.79 
  -2 -11  -8   48.24    2.95 
  -2  11   8   42.99    2.70 
  -2 -11   9   25.31    1.82 
   2 -11  -9   22.60    2.19 
  -2 -11   9   26.06    1.94 
   2 -11  -9   27.16    2.42 
  -2  11  -9   27.10    2.53 
   2 -11   9   23.15    1.85 
   2 -11   9   25.38    1.83 
  -2 -11  -9   23.73    2.47 
  -2  11   9   23.03    2.17 
  -2 -11  10   40.20    2.35 
   2 -11 -10   41.21    2.78 
  -2 -11  10   38.78    2.43 
  -2  11 -10   36.96    3.12 
   2 -11  10   39.24    2.44 
   2 -11  10   46.84    3.21 
  -2 -11 -10   42.70    2.80 
  -2  11  10   39.14    2.66 
  -2  11 -11   13.93    2.39 
  -2 -11  11   11.88    1.52 
   2 -11 -11   14.42    2.18 
   2 -11  11   13.26    2.00 
  -2 -11 -11   13.10    1.83 
  -2  11  11   12.72    1.96 
   2 -11  11   13.82    1.64 
  -2 -11 -11   16.30    2.72 
  -2 -11  12    0.90    1.31 
   2 -11 -12    0.69    1.79 
  -2  11 -12    1.15    2.01 
  -2 -11 -12    2.65    1.71 
  -2  11  12   -1.38    1.56 
   2 -11  12    0.71    1.81 
  -2 -11 -12   -2.03    2.31 
  -2 -11  13    7.01    1.24 
   2 -11 -13    7.01    1.98 
  -2  11 -13    6.52    2.14 
  -2 -11 -13    9.05    1.75 
  -2  11  13    5.67    1.76 
   2 -11  13    7.84    1.66 
  -2 -11 -13    1.98    2.14 
  -2 -11  14    6.28    1.36 
   2 -11 -14    6.42    2.38 
  -2  11 -14    4.93    2.10 
  -2 -11 -14    5.37    1.44 
  -2  11  14    3.83    2.21 
   2 -11  14    5.55    1.72 
  -2 -11  15   -0.54    1.39 
  -2 -11  15   -1.16    1.91 
  -2  11 -15   -0.09    1.92 
   2 -11 -15    1.60    2.27 
   2 -11  15    1.75    1.78 
  -2 -11 -15    2.35    2.10 
  -2 -11  16   -0.22    1.18 
  -2 -11  16    1.05    2.11 
  -2  11 -16    1.71    2.55 
   2 -11 -16    0.83    2.48 
   2 -11  16    1.33    2.04 
  -2 -11 -16    0.03    1.82 
   2 -12   0   -1.15    1.70 
   2 -12   0    0.40    1.93 
  -2  12   0    1.56    1.82 
   2 -12  -1   10.12    1.71 
   2 -12  -1    8.38    2.02 
  -2  12  -1   10.03    1.88 
   2 -12   1    9.02    1.55 
   2 -12   1   10.32    2.27 
  -2  12   1    8.82    1.71 
  -2  12   1    7.46    2.73 
   2 -12  -2   44.44    2.56 
   2 -12  -2   49.03    2.81 
  -2  12  -2   54.75    3.26 
   2 -12   2   50.24    2.59 
  -2 -12  -2   51.03    2.82 
   2 -12   2   49.39    3.05 
  -2  12   2   52.22    3.03 
  -2  12   2   49.40    3.46 
   2 -12  -3   40.49    2.47 
   2 -12  -3   37.21    2.45 
  -2  12  -3   36.10    2.74 
   2 -12   3   37.04    2.40 
   2 -12   3   36.37    2.42 
  -2  12   3   36.40    2.55 
  -2 -12  -3   40.75    2.79 
  -2  12   3   34.62    3.35 
   2 -12  -4   19.47    1.93 
  -2  12  -4   20.33    2.52 
   2 -12  -4   20.25    2.29 
  -2 -12   4   22.32    2.43 
  -2 -12  -4   24.43    2.27 
   2 -12   4   22.69    2.57 
  -2  12   4   25.45    2.40 
   2 -12   4   25.18    1.91 
  -2  12   4   19.56    2.93 
   2 -12  -5   21.00    2.15 
  -2  12  -5   19.10    2.45 
   2 -12  -5   18.84    2.32 
  -2 -12   5   20.28    2.63 
  -2 -12  -5   21.45    2.38 
   2 -12   5   21.45    2.32 
  -2  12   5   19.57    2.33 
   2 -12   5   21.93    2.22 
  -2  12   5   25.52    3.16 
  -2 -12   6   66.50    3.02 
   2 -12  -6   71.25    3.41 
  -2 -12   6   67.42    3.76 
   2 -12  -6   69.48    3.51 
  -2  12  -6   68.04    3.65 
   2 -12   6   68.11    3.31 
  -2  12   6   69.38    3.47 
  -2 -12  -6   70.07    3.36 
  -2 -12   7   52.15    2.64 
   2 -12  -7   56.57    3.07 
  -2 -12   7   64.16    3.28 
   2 -12  -7   48.23    3.15 
  -2  12  -7   54.85    3.35 
   2 -12   7   64.35    3.25 
  -2  12   7   58.89    3.13 
  -2 -12  -7   52.85    3.08 
  -2 -12   8   78.37    3.82 
   2 -12  -8   73.53    3.85 
  -2 -12   8   74.32    4.29 
   2 -12  -8   66.86    3.73 
  -2  12  -8   73.18    4.60 
   2 -12   8   80.67    4.18 
  -2  12   8   75.86    3.93 
  -2 -12  -8   79.30    4.13 
  -2 -12   9   51.69    2.53 
   2 -12  -9   53.08    2.97 
  -2  12  -9   49.78    3.10 
  -2 -12   9   52.59    3.07 
   2 -12   9   56.84    3.11 
  -2  12   9   52.22    3.03 
  -2 -12  -9   55.88    2.93 
  -2 -12  10   13.76    1.58 
   2 -12 -10   12.85    2.09 
  -2  12 -10   16.74    2.33 
  -2 -12 -10   13.68    1.98 
  -2  12  10   12.32    2.07 
   2 -12  10   13.56    1.50 
  -2 -12 -10   16.18    2.63 
  -2 -12  11   15.66    1.51 
   2 -12 -11   15.22    2.18 
  -2  12 -11   15.83    2.49 
  -2 -12  11   20.24    2.15 
   2 -12  11   17.35    1.75 
  -2  12  11   14.45    2.20 
  -2 -12 -11   14.75    1.48 
  -2 -12 -11   15.97    2.24 
  -2 -12  12    6.02    1.40 
  -2  12 -12    2.12    2.03 
  -2 -12  12    5.47    1.57 
  -2 -12 -12    7.25    1.71 
   2 -12  12    6.93    1.92 
  -2 -12 -12    9.37    2.25 
  -2 -12  13    2.22    1.27 
  -2  12 -13    1.73    2.15 
  -2 -12  13    1.32    2.18 
  -2 -12 -13    0.23    1.40 
   2 -12  13    2.20    1.74 
  -2 -12 -13    1.22    1.78 
  -2 -12  14    0.30    1.53 
  -2  12 -14    2.11    2.40 
  -2 -12  14   -0.56    2.28 
   2 -12 -14   -1.63    2.07 
  -2 -12 -14    1.28    1.68 
   2 -12  14    0.45    1.93 
  -2 -12 -14    6.66    2.67 
  -2 -12  15    1.32    2.00 
   2 -12 -15    1.24    2.45 
   2 -12  15    0.24    2.24 
   2 -13   0   11.18    1.89 
   2 -13   0   13.97    2.20 
  -2  13   0   15.67    2.13 
  -2  13   0   13.09    2.48 
   2 -13  -1    7.03    1.72 
  -2  13  -1    0.59    2.38 
   2 -13  -1    4.30    1.80 
  -2  13  -1    6.29    1.87 
   2 -13   1    5.85    1.79 
   2 -13   1    4.80    2.33 
  -2  13   1    4.23    1.96 
  -2  13   1    5.60    2.45 
  -2 -13  -1    3.22    1.84 
   2 -13  -2   15.29    1.68 
   2 -13  -2   17.38    2.10 
  -2  13  -2   14.74    2.00 
   2 -13   2   15.72    1.86 
   2 -13   2   15.34    2.13 
  -2  13   2   14.93    2.02 
  -2 -13  -2   15.24    1.68 
  -2  13   2   17.47    2.57 
   2 -13  -3    1.62    1.66 
   2 -13  -3    0.00    1.65 
  -2  13  -3    1.03    2.26 
   2 -13   3    2.13    1.55 
   2 -13   3    0.69    1.85 
  -2  13   3    0.86    1.80 
  -2 -13  -3   -0.98    1.19 
  -2  13   3    2.56    2.33 
   2 -13  -4   18.74    2.19 
  -2  13  -4   19.14    2.35 
   2 -13   4   19.25    1.96 
  -2 -13  -4   20.55    2.19 
   2 -13   4   17.56    1.74 
  -2  13   4   13.21    2.88 
  -2 -13   5   45.78    3.04 
   2 -13  -5   43.96    2.99 
  -2  13  -5   49.02    3.24 
   2 -13   5   56.24    3.23 
   2 -13   5   55.53    3.56 
  -2 -13  -5   49.89    3.38 
  -2  13   5   50.68    3.75 
  -2 -13   6   32.43    2.79 
   2 -13  -6   29.30    2.69 
  -2  13  -6   32.09    2.94 
   2 -13   6   32.83    2.43 
   2 -13   6   30.79    3.03 
  -2 -13  -6   34.33    2.46 
  -2 -13   7   22.99    2.33 
   2 -13  -7   25.91    2.35 
  -2  13  -7   21.13    2.46 
   2 -13   7   20.96    2.04 
   2 -13   7   22.79    2.28 
  -2 -13  -7   27.64    2.43 
  -2 -13  -7   28.47    2.99 
  -2 -13   8   10.28    1.55 
  -2  13  -8    9.45    2.00 
  -2 -13   8   10.08    1.62 
   2 -13   8   12.68    1.95 
   2 -13   8   11.56    2.52 
  -2 -13  -8    5.56    1.89 
  -2 -13  -8   12.38    2.30 
  -2 -13   9    6.82    1.60 
  -2  13  -9    6.54    1.98 
  -2 -13   9    3.63    2.07 
   2 -13   9    4.32    1.79 
   2 -13   9    4.43    1.58 
  -2 -13  -9    2.93    1.66 
  -2 -13  -9    2.06    2.40 
  -2 -13  10    7.94    1.42 
  -2  13 -10    3.01    2.09 
  -2 -13  10    8.04    2.49 
   2 -13  10    8.78    1.99 
   2 -13  10    8.04    2.45 
  -2 -13 -10    4.70    1.75 
  -2 -13 -10    6.68    2.19 
  -2 -13  11   17.93    1.63 
  -2  13 -11   19.45    2.62 
  -2 -13  11   16.03    2.15 
   2 -13  11   19.21    2.10 
   2 -13  11   18.96    2.17 
  -2 -13 -11   18.00    1.66 
  -2 -13 -11   17.50    2.39 
  -2  13 -12    9.67    2.77 
  -2 -13  12    9.71    2.31 
   2 -13  12   12.07    2.18 
   2 -13  12   12.75    2.34 
  -2 -13 -12   12.50    1.83 
  -2 -13 -12   10.27    2.27 
  -2 -13  13    2.83    1.82 
  -2 -13 -13    2.65    1.63 
   2 -13  13    1.19    1.89 
  -2 -13 -13    2.56    2.24 
  -2 -13  14   10.96    2.53 
   2 -13 -14   10.02    2.38 
   2 -13  14   12.01    2.44 
  -2 -14   0  110.39    4.50 
   2 -14   0  114.14    4.81 
  -2  14   0  112.14    5.54 
   2 -14  -1   19.60    2.41 
  -2  14  -1   21.48    3.11 
   2 -14   1   22.99    2.58 
  -2  14   1   30.09    3.12 
  -2 -14  -1   29.05    2.58 
   2 -14  -2   63.81    3.34 
  -2  14  -2   60.15    3.58 
   2 -14   2   61.40    3.45 
  -2  14   2   65.82    4.13 
  -2 -14  -2   60.44    3.25 
   2 -14  -3    5.03    2.13 
  -2  14  -3    2.68    2.26 
   2 -14   3    8.06    3.73 
  -2  14   3    6.63    3.05 
  -2 -14  -3    6.76    1.56 
   2 -14  -4   14.27    2.27 
  -2 -14  -4   13.94    1.79 
   2 -14   4   21.36    2.20 
   2 -14  -5   69.18    3.65 
  -2 -14  -5   79.88    3.04 
   2 -14   5   73.78    3.74 
  -2 -14   6    7.19    2.28 
  -2 -14  -6    6.31    1.79 
   2 -14   6    4.22    2.06 
  -2 -14   7   -1.68    2.05 
  -2 -14  -7   -3.80    1.60 
   2 -14   7    0.18    2.12 
  -2 -14  -7   -1.00    2.48 
  -2 -14   8    7.71    2.22 
  -2 -14  -8   11.03    1.75 
   2 -14   8   13.97    2.49 
  -2 -14  -8   15.05    2.78 
  -2 -14   9    0.92    2.42 
  -2 -14  -9    6.12    1.73 
   2 -14   9    1.70    2.10 
  -2 -14  -9    8.32    2.78 
  -2 -14  10    4.91    1.86 
  -2 -14 -10    1.93    1.47 
   2 -14  10    1.09    1.93 
  -2 -14 -10    1.85    2.25 
  -2 -14  11    7.72    2.13 
  -2 -14 -11    6.59    1.56 
   2 -14  11    3.46    2.28 
  -2 -14 -11    6.32    2.25 
  -2 -14  12   51.88    3.05 
   2 -14 -12   42.82    3.23 
  -2 -14 -12   47.65    2.21 
   2 -14  12   48.82    2.89 
  -2 -14 -12   48.75    3.05 
   2 -14 -13    5.42    2.91 
   2 -15   0   67.22    3.45 
  -2 -15   0   67.53    3.28 
  -2  15   0   80.72    4.45 
   2 -15  -1   14.98    2.30 
  -2  15  -1   17.79    2.67 
  -2 -15   1   14.19    2.18 
  -2 -15  -1   21.50    2.44 
  -2  15   1   17.98    3.06 
   2 -15   1   18.89    2.49 
   2 -15  -2   12.34    2.14 
  -2  15  -2    8.44    2.85 
   2 -15   2   11.18    2.72 
  -2  15   2   14.34    3.13 
  -2 -15  -2   10.50    2.03 
   2 -15  -3   12.28    2.19 
  -2  15  -3   13.06    2.59 
  -2 -15  -3   14.04    1.66 
   2 -15   3   12.07    2.33 
  -2  15  -4    8.58    2.85 
  -2 -15  -4   12.51    1.86 
   2 -15   4   12.53    2.08 
  -2  15  -5    4.83    2.64 
  -2 -15  -5    5.84    1.48 
   2 -15   5    8.94    1.96 
  -2  15  -6    8.25    2.74 
  -2 -15  -6    9.49    1.96 
   2 -15   6   12.28    2.11 
  -2  15  -7    7.96    2.67 
  -2 -15   7   13.15    2.45 
   2 -15   7   10.18    2.04 
  -2 -15  -7   12.86    1.79 
  -2  15  -8    1.05    2.74 
  -2 -15   8    1.28    1.75 
   2 -15   8   -1.08    2.00 
  -2 -15  -8    1.05    1.55 
  -2  15  -9   12.31    2.66 
  -2 -15   9   14.73    1.86 
   2 -15   9   18.99    2.51 
  -2 -15  -9   14.82    1.65 
   2 -15 -10   -0.20    2.72 
  -2 -15  10    1.02    1.97 
  -2  15 -10   -0.31    2.30 
   2 -15  10   -0.40    2.30 
  -2 -15 -10   -0.17    1.61 
  -2 -15  11    1.75    2.60 
  -2  15 -11    2.56    3.74 
   2 -16   0    2.85    2.42 
  -2 -16   0    6.51    1.93 
  -2  16   0   -1.40    3.25 
  -2  16  -1   -2.84    3.15 
  -2 -16   1    1.11    2.05 
   2 -16   1   -0.78    2.62 
  -2 -16  -1   -1.18    2.06 
  -2  16  -2    8.03    2.95 
  -2 -16  -2    7.37    2.00 
  -2  16  -3   36.37    3.21 
  -2 -16  -3   37.71    2.33 
   2 -16   3   35.79    2.63 
  -2  16  -4    1.79    2.75 
  -2 -16  -4    1.26    1.93 
   2 -16   4    0.13    2.17 
  -2  16  -5    3.89    2.86 
  -2 -16  -5    2.05    1.76 
   2 -16   5   -0.52    2.55 
  -2  16  -6    8.92    3.12 
  -2 -16  -6    8.47    1.68 
   2 -16   6    7.71    2.73 
  -2  16  -7    7.33    2.94 
  -2 -16  -7    8.32    1.68 
   2 -16   7    9.07    2.57 
  -2 -16   8    5.23    1.92 
  -2  16  -8    5.36    3.12 
  -2 -16  -8    5.39    1.68 
  -2 -17   1   43.86    3.80 
  -2 -17  -1   46.83    2.45 
  -2 -17  -2    5.93    1.80 
  -2 -17   3    1.86    1.98 
  -2 -17  -3    2.90    2.13 
  -2 -17   4   33.08    2.64 
  -2 -17  -4   33.24    2.50 
   3   0   0    0.86    1.80 
   3   0   0    0.34    2.30 
  -3   0   0   -2.08    3.22 
   3   0   1  137.87    6.65 
   3   0  -1  133.38    6.12 
   3   0   1  131.78    6.24 
  -3   0   1  138.04    6.70 
  -3   0  -1  140.49    7.03 
  -3   0  -2  878.53   19.45 
   3   0  -2  848.58   19.31 
  -3   0   2  891.29   20.55 
  -3   0  -2  836.25   20.36 
  -3   0  -3  436.29   16.84 
   3   0  -3  430.54   16.72 
  -3   0   3  410.38   16.31 
  -3   0  -3  418.04   17.28 
  -3   0  -4   99.64    5.81 
   3   0  -4   97.59    5.09 
  -3   0   4  114.19    5.45 
  -3   0  -4   91.35    5.37 
  -3   0  -5  129.34    6.09 
   3   0  -5  122.79    5.21 
  -3   0  -5  119.35    6.48 
  -3   0  -6  113.44    5.51 
   3   0  -6  118.31    6.00 
  -3   0  -6  114.11    6.01 
  -3   0  -7  153.68    6.92 
   3   0  -7  174.59    7.64 
  -3   0  -7  152.42    7.79 
  -3   0  -8 1009.04   22.23 
   3   0  -8  955.87   21.12 
  -3   0  -8  908.50   22.27 
  -3   0  -9  843.81   31.43 
   3   0  -9  887.77   27.15 
  -3   0  -9  886.49   28.01 
  -3   0 -10   62.27    5.85 
   3   0 -10   44.36    3.70 
  -3   0 -10   59.67    5.11 
  -3   0 -11   36.96    4.33 
   3   0 -11   46.18    4.54 
  -3   0 -11   39.07    4.63 
  -3   0  11   36.95    1.92 
  -3   0 -11   35.19    2.16 
   3   0 -11   40.52    2.50 
  -3   0 -11   32.76    2.44 
   3   0  11   35.44    2.10 
  -3   0  11   35.11    1.93 
  -3   0  11   33.09    2.17 
  -3   0  11   35.32    2.13 
  -3   0 -12    4.48    3.43 
   3   0 -12    3.08    3.43 
  -3   0 -12    2.56    4.61 
  -3   0  12    2.30    1.23 
  -3   0 -12    4.27    1.90 
   3   0 -12    1.75    1.67 
  -3   0 -12   -1.09    1.86 
   3   0  12    1.90    1.51 
  -3   0  12    4.21    1.49 
  -3   0  12    1.75    1.38 
  -3   0  12    2.90    1.46 
  -3   0 -13   -2.03    4.01 
   3   0 -13    3.54    3.97 
  -3   0 -13   -0.10    4.12 
  -3   0  13    0.78    1.24 
  -3   0 -13    0.42    1.84 
   3   0 -13    2.94    2.19 
  -3   0 -13   -3.40    1.83 
   3   0  13   -0.68    1.57 
  -3   0  13    1.11    1.65 
  -3   0  13   -2.88    1.75 
  -3   0  13    1.06    1.05 
  -3   0 -14   38.25    4.08 
   3   0 -14   45.24    5.24 
  -3   0  14   45.59    2.07 
  -3   0 -14   41.05    2.47 
   3   0 -14   48.89    3.29 
  -3   0 -14   42.38    2.90 
   3   0  14   43.14    2.42 
  -3   0  14   42.40    2.86 
  -3   0  14   44.98    3.18 
  -3   0  14   47.25    2.49 
  -3   0  15    3.46    1.20 
  -3   0 -15    3.48    2.08 
   3   0 -15    0.19    2.42 
  -3   0 -15    3.82    1.82 
   3   0 -15    4.45    1.40 
   3   0  15    2.82    1.77 
  -3   0  15    2.28    1.91 
  -3   0  15    0.83    1.45 
  -3   0  16    1.27    1.22 
  -3   0 -16   -0.53    1.69 
   3   0 -16    3.13    2.24 
  -3   0 -16   -1.57    2.03 
   3   0 -16   -2.58    1.50 
   3   0  16    2.25    1.89 
  -3   0  16   -4.83    1.74 
  -3   0  16   -0.37    1.66 
  -3   0  17   22.10    1.65 
   3   0 -17   20.58    2.24 
  -3   0 -17   21.33    2.18 
   3   0 -17   18.05    2.04 
  -3   0  17   18.46    2.14 
  -3   0  17   17.55    2.10 
  -3   0  18    5.99    1.47 
   3   0 -18    3.82    2.24 
   3   0  18    7.52    1.85 
  -3   0 -18    6.77    2.10 
   3   0 -18    5.84    2.24 
  -3   0  18    5.02    1.42 
  -3   0 -18    6.49    2.69 
  -3   0  19    0.90    1.65 
   3   0 -19    2.00    1.96 
   3   0  19    5.43    1.67 
  -3   0 -19    5.42    2.02 
   3   0 -19    1.14    2.05 
  -3   0  19    6.34    1.97 
  -3   0 -19    2.08    2.60 
   3   0 -20    5.68    2.06 
   3   0  20   10.27    1.66 
  -3   0 -20    6.14    2.73 
   3   0 -20    6.14    2.45 
  -3   0  20    8.52    1.74 
  -3   0 -20    8.90    2.70 
   3   0 -21    2.36    2.93 
   3   1   0 4564.10   76.46 
   3  -1   0 4482.68   75.72 
  -3  -1   0 4565.03   77.16 
   3   1   1  136.56    6.15 
   3   1   1  149.11    6.68 
   3  -1  -1  151.67    6.78 
  -3  -1   1  137.25    6.77 
  -3  -1   1  149.97    6.76 
  -3   1  -1  151.41    7.96 
   3   1  -1  137.95    6.66 
   3  -1   1  146.79    8.22 
  -3   1   1  140.97    6.50 
  -3  -1  -1  154.37    7.05 
   3  -1  -2  303.72   12.50 
   3   1   2  293.30   12.01 
  -3  -1   2  300.91   11.84 
  -3   1  -2  304.65   12.89 
  -3  -1  -2  295.13   12.22 
   3   1  -2  284.85   12.05 
  -3  -1  -2  288.31   12.81 
   3  -1   2  287.89   11.30 
  -3   1  -3   10.20    2.84 
  -3  -1   3   15.99    2.91 
   3  -1  -3    8.39    2.74 
  -3   1  -3   10.36    3.66 
   3   1  -3   10.86    2.52 
  -3  -1  -3    8.09    2.53 
  -3  -1  -3   13.20    2.49 
  -3   1  -4   19.14    3.48 
  -3   1  -4   16.13    4.00 
   3  -1  -4   15.03    3.35 
  -3  -1  -4   14.90    2.92 
  -3  -1  -4   19.29    3.53 
   3   1  -4   18.61    3.14 
  -3   1  -5  360.53   14.12 
  -3   1  -5  390.41   15.87 
   3  -1  -5  377.78   14.64 
  -3  -1  -5  402.48   16.20 
  -3  -1  -5  399.19   16.49 
   3   1  -5  379.21   15.19 
  -3   1  -6 1910.30   36.35 
  -3   1  -6 1836.75   37.27 
   3  -1  -6 1811.82   35.07 
   3   1  -6 1876.04   35.34 
  -3  -1  -6 1937.49   36.95 
  -3  -1  -6 1863.19   37.73 
  -3   1  -7   67.76    4.49 
  -3   1  -7   68.63    5.53 
   3  -1  -7   71.54    4.36 
   3   1  -7   65.05    4.74 
  -3  -1  -7   77.76    4.89 
  -3  -1  -7   72.45    5.59 
  -3   1  -8  417.09   16.19 
  -3   1  -8  359.47   14.76 
   3  -1  -8  370.07    9.97 
  -3  -1  -8  352.36   13.86 
  -3  -1  -8  353.00   14.00 
   3   1  -8  376.05   15.13 
  -3   1  -9    2.70    2.72 
  -3   1  -9    2.45    4.06 
   3  -1  -9    6.71    2.33 
  -3  -1  -9    6.61    2.78 
  -3  -1  -9    1.12    3.69 
   3   1  -9    3.01    3.07 
  -3   1 -10  283.89   12.28 
  -3   1 -10  280.97   13.16 
   3  -1 -10  271.32   12.31 
  -3  -1 -10  275.38   12.67 
  -3  -1 -10  287.87   13.28 
   3   1 -10  265.92   11.71 
  -3   1 -11  142.69    7.70 
  -3   1 -11  127.47    5.76 
  -3   1 -11  122.30    5.12 
   3  -1 -11  140.51    7.55 
  -3   1 -11  133.98    8.64 
  -3  -1  11  119.07    5.04 
  -3  -1  11  134.34    5.31 
   3   1  11  120.58    5.07 
  -3  -1  11  135.43    5.99 
   3  -1 -11  139.96    5.90 
  -3  -1 -11  130.09    5.72 
  -3   1  11  128.62    5.05 
  -3  -1 -11  126.22    5.10 
  -3  -1 -11  143.97    7.85 
   3   1 -11  132.42    7.79 
   3  -1  11  129.92    5.33 
   3   1 -11  135.59    5.91 
  -3  -1 -11  129.71    8.49 
  -3   1  11  140.08    5.51 
  -3  -1 -11  119.62    5.37 
  -3  -1 -11  139.98    5.93 
  -3   1  11  135.61    5.83 
  -3   1  11  133.58    5.57 
  -3   1 -12   12.39    3.69 
  -3  -1  12   14.13    2.27 
  -3   1 -12    8.45    2.03 
   3  -1 -12   13.60    3.11 
  -3   1 -12   12.76    3.40 
   3  -1 -12   13.85    1.60 
  -3  -1  12    8.07    1.29 
  -3  -1  12   15.45    1.73 
  -3  -1  12   14.77    1.53 
  -3   1 -12   10.64    2.19 
   3   1  12   13.13    1.82 
   3   1 -12   11.11    2.87 
  -3  -1 -12    8.54    3.72 
  -3  -1 -12   11.34    4.07 
  -3  -1 -12    7.71    1.99 
   3  -1  12   11.64    1.82 
   3   1 -12   11.33    1.70 
  -3   1  12   14.64    2.00 
  -3  -1 -12   10.63    1.71 
  -3   1  12    9.43    1.50 
  -3   1  12   12.71    2.38 
  -3  -1 -12   11.28    1.86 
  -3   1  12   11.47    1.59 
  -3   1 -13  211.41    9.32 
   3   1  13  192.05    6.24 
  -3  -1  13  198.97    6.66 
  -3   1 -13  202.68   10.15 
  -3  -1  13  192.62    5.85 
  -3  -1  13  208.87    7.30 
  -3   1 -13  194.06    6.48 
  -3  -1  13  196.00    6.12 
   3  -1 -13  211.92    7.18 
  -3   1 -13  201.24    6.82 
   3   1 -13  197.76    6.68 
  -3  -1 -13  194.21    6.92 
   3  -1  13  204.67    6.40 
  -3  -1 -13  213.29    9.47 
   3   1 -13  199.34    9.27 
  -3   1  13  212.31    6.68 
  -3  -1 -13  196.04    6.96 
  -3   1  13  206.84    6.28 
  -3   1  13  200.13    6.76 
  -3  -1 -13  204.80    6.85 
  -3   1  13  202.96    6.10 
  -3   1 -14   99.27    7.21 
  -3   1 -14  103.73    4.41 
   3   1  14   99.50    4.33 
   3  -1 -14   98.06    6.79 
  -3   1 -14   88.74    6.83 
  -3  -1  14  102.60    3.97 
  -3  -1  14  109.95    4.21 
   3  -1 -14  113.55    4.67 
  -3   1 -14   97.06    4.41 
  -3  -1  14  101.24    4.27 
  -3  -1 -14  114.99    7.27 
  -3  -1 -14  101.88    4.50 
  -3  -1 -14  101.38    4.39 
   3  -1  14  105.23    4.55 
   3   1 -14  102.85    6.60 
   3   1 -14   92.73    3.91 
  -3   1  14  104.68    4.72 
  -3   1  14  112.38    4.90 
  -3   1  14  101.24    3.73 
  -3   1  14   99.15    3.96 
  -3  -1  15   23.54    1.91 
  -3   1 -15   19.37    2.40 
   3  -1 -15   21.65    2.47 
   3  -1 -15   20.11    2.36 
  -3   1 -15   19.17    2.05 
  -3  -1  15   19.65    1.70 
  -3  -1  15   24.21    2.00 
   3   1  15   24.11    2.43 
  -3   1  15   18.71    1.80 
   3   1 -15   17.93    2.37 
  -3  -1 -15   16.92    2.22 
   3  -1  15   21.86    2.31 
  -3  -1 -15   20.68    2.64 
  -3   1  15   24.07    1.94 
   3   1 -15   18.20    2.26 
  -3   1  15   22.61    1.96 
  -3  -1  16    3.88    1.38 
  -3   1 -16    0.80    1.94 
   3  -1 -16    3.54    1.70 
   3  -1 -16    2.43    1.92 
  -3   1 -16    0.54    2.13 
  -3  -1  16    2.28    1.87 
  -3  -1  16   -0.22    1.32 
   3   1  16   -2.38    1.79 
  -3   1  16    4.20    1.28 
   3   1 -16   -2.10    2.19 
  -3  -1 -16    1.15    2.25 
   3  -1  16    0.96    2.04 
  -3  -1 -16    0.37    1.87 
  -3   1  16    2.27    1.96 
   3   1 -16    0.89    2.03 
  -3   1  16    5.31    1.58 
  -3  -1  17    4.08    1.41 
  -3   1 -17    3.06    2.41 
  -3  -1  17    4.41    1.88 
   3  -1 -17    1.91    1.47 
   3  -1 -17    4.31    2.09 
  -3   1 -17    4.27    2.10 
   3   1  17    4.72    1.95 
  -3  -1 -17    5.61    1.99 
   3   1 -17    2.62    2.15 
   3   1 -17    3.75    1.69 
  -3  -1 -17    3.67    2.27 
   3  -1  17    3.40    1.51 
  -3   1  17    1.10    1.42 
  -3   1  17    3.88    1.32 
  -3   1  17    4.45    1.54 
  -3  -1  18   41.10    2.07 
  -3  -1  18   37.45    2.84 
   3   1  18   40.27    2.43 
   3  -1 -18   35.80    2.84 
  -3   1 -18   38.79    2.94 
   3  -1 -18   41.68    3.05 
  -3   1 -18   37.71    3.07 
  -3   1  18   35.30    2.03 
   3   1 -18   40.31    3.14 
  -3  -1 -18   37.88    2.71 
   3   1 -18   35.22    2.64 
   3  -1  18   34.45    2.38 
  -3   1  18   33.25    2.32 
  -3  -1 -18   40.24    3.10 
  -3  -1  19    1.98    1.30 
   3   1  19   -0.71    1.61 
   3  -1 -19    0.14    2.06 
  -3  -1  19   -1.09    1.76 
  -3   1 -19   -1.33    2.22 
   3  -1 -19   -2.68    2.04 
  -3   1 -19    0.50    2.17 
   3   1 -19    3.07    1.85 
  -3  -1 -19    2.57    2.15 
   3   1 -19   -0.49    2.19 
   3  -1  19   -0.42    1.85 
  -3   1  19    2.42    1.82 
  -3  -1 -19   -2.33    2.38 
   3  -1 -20    1.12    1.92 
   3   1  20    3.61    1.84 
  -3   1 -20    3.46    2.34 
  -3   1 -20    2.42    2.42 
   3  -1 -20    3.38    1.98 
   3  -1  20    3.89    1.75 
  -3  -1 -20    4.13    2.48 
  -3   1  20    3.45    1.82 
   3   1 -20    2.54    2.41 
  -3  -1 -20    3.92    2.49 
  -3  -1  21    2.17    1.94 
   3  -1 -21    1.30    2.49 
  -3  -1 -21    1.95    2.39 
   3   1 -21    2.20    3.17 
  -3   1  21    1.02    1.94 
   3  -2   0    6.45    3.25 
  -3  -2   0    8.49    3.12 
   3   2   1 1379.52   29.69 
   3  -2  -1 1286.26   26.83 
  -3  -2   1 1287.83   28.46 
  -3  -2   1 1332.19   27.02 
   3  -2   1 1353.49   28.31 
  -3  -2  -1 1343.19   27.84 
   3   2  -1 1354.85   28.88 
  -3  -2   2  114.04    5.17 
  -3   2  -2  114.04    5.63 
   3   2   2  112.08    5.87 
   3  -2  -2  122.38    5.14 
  -3  -2  -2  116.85    6.59 
   3  -2   2  114.33    5.60 
  -3  -2  -2  121.85    5.98 
   3   2  -2  123.48    6.00 
  -3   2  -3  602.16   21.44 
  -3   2  -3  646.15   24.40 
   3   2   3  665.23   24.30 
   3  -2  -3  647.49   23.54 
   3   2  -3  621.56   23.19 
  -3   2   3  682.76   24.63 
  -3  -2  -3  601.29   23.17 
  -3  -2  -3  648.44   23.90 
  -3   2  -4  551.08   20.76 
  -3   2  -4  584.34   22.38 
   3  -2  -4  573.36   21.03 
  -3  -2  -4  631.99   23.69 
  -3  -2  -4  618.27   22.25 
  -3   2  -5  605.60   22.58 
   3  -2  -5  621.63   22.72 
  -3   2  -5  659.76   24.62 
  -3  -2  -5  625.36   22.79 
   3   2  -5  659.18   24.06 
  -3   2   5  621.50   22.04 
  -3  -2  -5  629.20   23.70 
  -3   2  -6   95.90    4.83 
  -3   2  -6   84.63    6.25 
   3  -2  -6   91.20    4.57 
  -3  -2  -6   94.79    5.10 
  -3  -2  -6   92.84    5.55 
   3   2  -6   98.30    5.24 
  -3   2  -7  163.18    6.76 
  -3   2  -7  149.58    7.65 
   3  -2  -7  155.20    6.74 
   3   2  -7  153.26    7.09 
  -3  -2  -7  170.65    7.21 
  -3  -2  -7  159.82    7.86 
  -3   2  -8  204.41    7.80 
  -3   2  -8  190.07    8.77 
   3  -2  -8  191.02    7.67 
   3   2  -8  183.94    7.64 
  -3  -2  -8  191.27    7.40 
  -3  -2  -8  191.93    8.61 
  -3   2  -9   81.75    6.56 
  -3   2  -9   76.97    6.32 
   3  -2  -9   73.86    5.55 
   3   2  -9   95.48    7.53 
  -3  -2  -9   78.41    6.36 
  -3  -2  -9   74.52    6.59 
  -3   2 -10   68.17    5.64 
   3  -2 -10   58.98    2.55 
  -3   2 -10   67.83    6.27 
   3  -2 -10   62.66    5.06 
  -3  -2  10   56.23    2.79 
  -3  -2  10   59.58    2.65 
  -3  -2  10   53.43    2.18 
  -3  -2 -10   69.62    5.39 
   3   2 -10   62.57    5.25 
  -3   2  10   59.61    2.51 
  -3  -2 -10   67.07    6.58 
  -3  -2 -10   63.11    3.84 
  -3   2 -11   17.90    3.64 
  -3   2 -11   16.28    2.16 
  -3  -2  11   12.78    1.39 
   3  -2 -11    9.82    3.11 
  -3   2 -11   21.75    3.63 
  -3  -2  11   13.24    1.29 
  -3  -2  11   12.17    1.56 
  -3   2 -11   16.27    1.85 
   3   2  11   14.29    1.65 
   3  -2 -11   16.32    1.72 
  -3  -2  11   15.19    2.15 
  -3  -2  11   15.47    1.53 
   3   2 -11   18.17    3.79 
  -3  -2 -11   13.48    2.22 
  -3   2  11   11.77    1.45 
   3  -2  11   16.34    1.78 
  -3  -2 -11   13.54    1.67 
  -3   2  11   13.61    1.62 
  -3  -2 -11   15.43    2.34 
  -3  -2 -11   16.80    3.45 
  -3   2  11   11.78    1.69 
   3   2 -11   14.01    2.00 
  -3   2  11   14.93    1.64 
  -3   2 -12   -0.71    3.47 
  -3   2 -12   -1.13    1.68 
   3   2  12    2.05    1.63 
   3  -2 -12    1.90    2.50 
  -3   2 -12   -0.98    3.59 
  -3  -2  12    0.56    1.18 
  -3   2 -12    2.30    1.79 
   3  -2 -12    2.15    1.65 
  -3  -2  12    3.31    1.32 
  -3  -2 -12   -0.22    1.75 
  -3  -2 -12    5.68    3.58 
  -3  -2 -12    0.89    1.39 
  -3   2  12    1.25    1.31 
   3  -2  12    0.54    1.63 
   3   2 -12   -0.29    3.38 
   3   2 -12   -0.48    1.74 
  -3   2  12    1.38    1.74 
  -3  -2 -12   -0.85    1.78 
  -3   2  12   -1.46    1.99 
  -3   2  12    2.42    1.45 
  -3   2 -13   92.57    7.92 
  -3   2 -13  106.82    4.18 
   3   2  13   99.85    4.05 
   3  -2 -13   96.60    6.24 
  -3   2 -13   97.55    6.76 
  -3  -2  13  109.14    3.78 
  -3   2 -13  114.01    4.66 
   3  -2 -13  112.29    4.60 
  -3  -2  13  108.67    4.14 
  -3  -2 -13  110.52    4.43 
  -3  -2 -13  114.81    6.94 
  -3  -2 -13  113.51    4.18 
  -3   2  13  114.19    4.00 
   3  -2  13  105.95    3.91 
   3   2 -13   92.62    6.24 
   3   2 -13  104.67    4.18 
  -3   2  13  115.25    4.19 
  -3  -2 -13  103.64    4.44 
  -3   2  13  101.03    4.27 
  -3   2  13  108.45    3.98 
  -3   2 -14   50.04    5.15 
  -3  -2  14   58.64    2.58 
   3  -2 -14   47.81    4.46 
  -3   2 -14   43.46    5.17 
  -3   2 -14   55.54    3.43 
   3   2  14   62.02    3.18 
  -3   2 -14   63.66    3.65 
   3  -2 -14   52.57    2.84 
  -3  -2  14   48.92    2.95 
   3   2 -14   41.28    4.98 
  -3   2  14   52.36    2.67 
  -3  -2 -14   52.58    3.01 
  -3  -2 -14   57.05    3.27 
   3  -2  14   52.46    2.97 
   3   2 -14   56.77    3.40 
   3   2 -14   54.08    3.20 
  -3  -2 -14   48.93    3.16 
  -3   2  14   54.76    3.39 
  -3   2  14   58.56    2.90 
  -3  -2  15   30.82    1.93 
   3   2  15   40.67    2.82 
  -3   2 -15   34.56    2.48 
  -3   2 -15   35.12    2.80 
   3  -2 -15   27.35    2.77 
   3  -2 -15   35.55    2.81 
  -3  -2  15   31.05    2.33 
  -3   2  15   31.39    2.07 
  -3  -2 -15   31.77    2.59 
   3   2 -15   34.38    2.87 
   3  -2  15   32.33    2.34 
   3   2 -15   30.66    2.95 
  -3   2  15   29.21    2.41 
  -3  -2 -15   31.15    2.32 
  -3   2  15   30.76    2.56 
  -3  -2  16   27.50    2.11 
  -3   2 -16   27.39    3.03 
  -3  -2  16   23.61    2.08 
   3  -2 -16   20.71    2.05 
   3  -2 -16   23.00    2.32 
  -3  -2  16   26.52    2.30 
  -3   2 -16   19.59    2.35 
   3   2  16   23.55    2.01 
   3   2 -16   26.42    2.70 
   3   2 -16   20.98    2.53 
  -3  -2 -16   26.74    2.27 
   3  -2  16   28.13    2.20 
  -3   2  16   21.42    2.29 
  -3   2  16   23.17    1.82 
  -3  -2 -16   21.62    2.14 
  -3   2  16   23.71    2.10 
  -3  -2  17    6.07    1.40 
  -3  -2  17    3.05    1.75 
   3  -2 -17    3.03    1.98 
   3   2  17    2.53    1.86 
  -3   2 -17    4.11    2.47 
  -3   2 -17   -0.30    2.44 
  -3   2  17    5.34    1.47 
   3   2 -17    3.18    1.96 
  -3  -2 -17    5.84    1.93 
   3   2 -17    3.34    2.22 
   3  -2  17    5.47    1.64 
  -3   2  17    6.10    1.87 
  -3  -2 -17    4.21    2.17 
  -3   2  17    4.55    1.53 
  -3  -2  18   18.66    1.75 
   3  -2 -18   20.89    2.45 
  -3  -2  18   19.53    2.02 
   3   2  18   18.91    1.93 
  -3   2 -18   20.54    2.59 
  -3   2 -18   16.28    3.12 
  -3  -2 -18   20.78    2.09 
   3   2 -18   18.64    2.44 
   3  -2  18   20.07    2.11 
  -3   2  18   22.11    2.13 
   3   2 -18   18.68    2.30 
  -3  -2 -18   13.94    2.72 
  -3  -2  19   13.21    1.49 
  -3  -2  19   15.72    2.35 
   3   2  19   14.59    2.03 
  -3   2 -19   15.60    2.90 
   3  -2 -19   16.37    2.23 
  -3   2 -19   14.04    2.52 
   3  -2  19   15.25    1.80 
  -3  -2 -19   15.85    2.32 
   3   2 -19   11.61    2.09 
  -3   2  19   16.06    1.60 
  -3  -2 -19   15.59    2.78 
  -3  -2  20    1.26    1.41 
   3  -2 -20    0.89    1.88 
  -3  -2  20    2.89    1.73 
  -3   2 -20    3.57    2.16 
   3  -2  20   -0.18    1.43 
  -3   2  20    1.91    1.99 
  -3  -2 -20   -0.95    2.11 
   3   2 -20    2.32    2.12 
   3  -2 -21    4.61    2.65 
  -3  -2 -21    1.31    2.53 
   3  -3   0 2904.66   52.02 
  -3   3   0 2806.91   51.83 
   3   3   0 2695.62   50.08 
   3  -3  -1  322.83   13.15 
   3   3   1  287.65   12.84 
  -3   3  -1  308.01   12.79 
  -3   3   1  299.40   13.36 
   3  -3   1  306.25   12.46 
  -3  -3   2   17.59    2.60 
   3  -3  -2   15.14    3.09 
   3   3  -2   16.06    2.84 
   3  -3   2   14.35    3.40 
  -3  -3  -2   17.25    2.62 
  -3   3   2   15.93    3.92 
   3   3   3  944.64   21.39 
   3  -3  -3  978.16   21.07 
   3   3  -3  998.21   22.22 
  -3  -3  -3 1008.16   23.07 
   3  -3   3 1022.76   22.11 
  -3   3   3  928.99   21.02 
  -3  -3  -3 1052.07   24.72 
  -3   3  -4   29.62    3.00 
   3  -3  -4   36.15    3.57 
  -3  -3  -4   29.37    3.02 
   3   3  -4   29.17    3.72 
  -3   3   4   30.67    3.65 
  -3  -3  -4   29.14    3.52 
  -3   3  -5  907.56   20.83 
  -3   3  -5  830.38   20.54 
   3   3  -5  890.80   20.44 
  -3   3   5  819.14   18.00 
  -3  -3  -5  830.70   21.01 
  -3  -3  -5  857.18   19.43 
  -3   3  -6   49.02    3.74 
  -3   3  -6   52.00    5.45 
   3  -3  -6   54.12    4.03 
   3   3  -6   55.51    4.49 
  -3  -3  -6   47.57    4.45 
  -3  -3  -6   50.72    4.21 
  -3   3  -7   14.78    3.43 
  -3   3  -7   16.16    4.48 
  -3  -3  -7   18.85    3.09 
  -3  -3  -7   15.82    3.82 
   3   3  -7   21.13    3.11 
  -3   3  -8   33.57    3.73 
  -3   3  -8   38.31    4.76 
   3   3  -8   33.44    3.40 
  -3  -3  -8   33.48    4.17 
  -3  -3  -8   38.60    3.75 
  -3   3  -9   36.69    4.04 
  -3   3  -9   42.98    5.41 
   3   3  -9   37.43    3.97 
  -3  -3  -9   46.89    3.85 
  -3   3 -10   12.93    3.70 
  -3   3 -10   16.14    1.86 
  -3   3 -10   12.00    4.11 
  -3  -3  10   12.61    1.50 
   3   3 -10   15.95    3.56 
  -3  -3 -10   16.09    3.16 
  -3  -3 -10   15.11    1.57 
  -3   3  10   15.30    1.20 
   3  -3  10   19.17    1.87 
  -3   3  10   12.97    1.60 
  -3  -3 -10   12.42    2.31 
  -3   3  10   13.44    2.22 
  -3  -3 -10   17.27    1.66 
  -3   3  10   15.30    1.51 
  -3   3 -11  104.16    6.29 
  -3   3 -11  100.26    4.66 
  -3  -3  11   95.73    4.03 
  -3   3 -11  100.81    6.85 
  -3  -3  11   97.88    4.14 
  -3   3 -11   89.98    4.42 
  -3  -3  11   98.18    4.15 
  -3  -3  11  101.13    4.37 
   3  -3  11   96.04    4.01 
   3   3 -11   89.69    6.17 
  -3  -3 -11   99.70    4.12 
   3   3 -11   97.41    4.63 
  -3   3  11   99.67    4.46 
  -3  -3 -11   99.28    6.82 
   3  -3  11   98.78    4.38 
  -3  -3 -11   97.68    4.37 
  -3   3  11   96.92    4.57 
  -3  -3 -11  103.90    4.88 
  -3   3  11   91.36    4.43 
  -3   3  11   95.18    3.93 
  -3   3  11  103.39    4.42 
  -3   3 -12   93.05    6.27 
  -3   3 -12   91.67    4.10 
   3   3  12   81.52    3.81 
  -3   3 -12   92.22    6.55 
  -3  -3  12   82.43    3.59 
  -3  -3  12   82.66    3.39 
  -3   3 -12   82.28    3.94 
  -3  -3  12   83.69    3.49 
  -3  -3  12   84.53    4.02 
   3  -3  12   89.16    3.60 
  -3  -3 -12   85.88    6.29 
  -3  -3 -12   86.10    3.70 
   3   3 -12   83.97    4.14 
   3  -3  12   85.22    3.81 
   3   3 -12   91.82    6.23 
  -3  -3 -12   83.84    3.96 
  -3  -3 -12   87.11    4.28 
  -3   3  12   82.53    4.03 
  -3   3  12   82.68    3.45 
  -3   3  12   82.28    3.53 
  -3   3 -13   78.05    5.86 
  -3  -3  13   77.05    3.47 
  -3   3 -13   78.54    7.25 
  -3  -3  13   74.17    2.86 
  -3   3 -13   80.91    3.85 
  -3   3 -13   83.55    3.50 
  -3  -3  13   85.85    3.27 
  -3  -3  13   77.40    3.21 
   3   3  13   82.91    3.53 
  -3  -3 -13   74.64    3.63 
   3   3 -13   71.71    3.37 
  -3  -3 -13   74.17    3.08 
  -3   3  13   83.85    3.20 
   3  -3  13   87.55    3.63 
   3   3 -13   78.71    6.50 
  -3  -3 -13   79.14    3.78 
  -3   3  13   81.39    3.68 
  -3  -3 -13   87.42    3.63 
  -3   3  13   81.17    3.31 
  -3  -3  14   79.59    3.21 
  -3  -3  14   70.71    3.07 
   3   3  14   71.26    3.54 
  -3  -3  14   75.63    3.47 
  -3   3 -14   81.12    4.38 
  -3   3 -14   70.79    3.77 
  -3  -3 -14   66.02    3.23 
   3   3 -14   70.60    3.78 
  -3  -3 -14   73.97    3.82 
   3   3 -14   74.83    3.76 
   3  -3  14   72.71    3.32 
  -3  -3 -14   72.66    3.87 
  -3   3  14   75.11    3.68 
  -3   3  14   74.75    3.18 
  -3   3  14   70.66    3.06 
  -3  -3  15   13.79    1.55 
   3   3  15   17.92    1.96 
  -3  -3  15   13.96    1.86 
  -3   3 -15   14.02    2.56 
  -3   3 -15   14.43    2.16 
   3  -3  15   19.87    2.06 
   3   3 -15   12.68    2.35 
  -3   3  15   16.23    1.27 
  -3  -3 -15   13.34    2.27 
   3   3 -15   16.00    1.93 
  -3  -3 -15   19.18    2.02 
  -3   3  15   16.43    2.38 
  -3   3  15   14.19    1.95 
  -3  -3  16   13.46    1.57 
   3   3  16   12.20    1.90 
  -3  -3  16   10.58    1.89 
  -3   3 -16    9.45    2.63 
  -3   3 -16   12.20    2.33 
   3  -3  16    8.85    1.76 
   3   3 -16    9.31    2.42 
  -3   3  16   11.91    1.54 
  -3  -3 -16    8.21    1.99 
   3   3 -16   10.72    2.20 
  -3  -3 -16   10.72    2.08 
  -3   3  16    8.88    1.65 
  -3  -3  17   19.94    2.12 
  -3  -3  17   18.19    2.27 
  -3   3 -17   16.76    2.81 
   3   3  17   21.90    2.47 
  -3   3 -17   17.55    2.75 
   3  -3 -17   20.56    2.41 
   3  -3  17   22.21    1.84 
  -3  -3 -17   19.75    2.42 
   3   3 -17   22.27    2.39 
  -3   3  17   18.47    2.02 
  -3  -3  18    0.84    1.48 
   3  -3 -18    1.86    2.48 
  -3  -3  18    0.99    1.73 
   3   3  18    0.83    1.71 
  -3   3 -18   -0.95    2.43 
   3   3 -18   -1.35    1.97 
   3  -3  18    2.40    1.67 
  -3  -3 -18   -2.29    2.55 
  -3  -3  19    4.49    1.17 
   3  -3 -19    1.80    2.00 
  -3  -3  19    3.21    1.56 
  -3   3 -19   -0.32    2.21 
  -3  -3 -19    1.22    2.04 
   3  -3  19    3.50    1.68 
   3   3 -19    2.92    2.87 
  -3  -3  20    8.54    1.49 
   3  -3 -20    9.43    2.34 
  -3  -3  20    9.18    2.07 
  -3   3 -20    7.66    3.02 
  -3  -3 -20    8.21    2.35 
   3  -3  20    9.41    1.71 
   3   3 -20    7.36    2.54 
   3  -3 -21    2.32    2.02 
  -3   4   0  478.50   18.66 
   3   4   0  419.41   17.70 
  -3   4  -1  567.84   21.20 
  -3   4   1  616.45   22.65 
  -3   4  -2  174.43    7.89 
   3   4  -2  168.44    7.55 
  -3   4   2  180.17    8.01 
  -3   4  -3  213.50    9.38 
  -3  -4  -3  214.33    7.77 
  -3   4   3  228.03    9.92 
   3   4  -3  208.15    8.22 
  -3   4  -4  144.18    7.23 
  -3  -4  -4  157.89    7.34 
  -3   4   4  163.48    7.29 
   3   4  -4  145.76    7.08 
  -3   4  -5  163.39    6.54 
   3   4  -5  174.49    7.47 
  -3  -4  -5  165.32    7.18 
  -3   4   5  186.35    7.46 
  -3   4  -6   48.79    4.38 
   3   4  -6   41.09    3.92 
  -3  -4  -6   39.03    3.54 
  -3   4   6   38.34    3.37 
  -3   4  -7   16.60    3.44 
   3   4  -7   13.78    3.17 
  -3  -4  -7   10.64    2.68 
  -3   4  -8   25.50    4.14 
  -3   4  -8   17.94    4.07 
   3   4  -8   30.04    3.69 
  -3  -4  -8   23.04    3.20 
  -3   4  -9   47.57    4.25 
  -3   4  -9   45.47    2.99 
  -3   4  -9   58.06    4.98 
  -3  -4   9   48.00    2.00 
  -3  -4  -9   54.10    4.42 
   3  -4   9   47.28    2.31 
  -3  -4  -9   48.85    2.39 
   3   4  -9   53.27    4.70 
  -3   4 -10  138.56    7.84 
  -3  -4  10  132.94    5.39 
  -3   4 -10  127.02    5.76 
  -3   4 -10  136.97    7.86 
  -3  -4  10  117.54    4.75 
  -3  -4  10  122.62    4.95 
  -3  -4  10  121.16    5.07 
   3  -4  10  123.22    4.86 
   3   4 -10  123.93    5.68 
  -3   4  10  122.09    5.10 
  -3  -4 -10  120.22    5.17 
   3  -4  10  127.08    5.25 
  -3   4  10  130.66    5.11 
   3   4 -10  121.41    7.29 
  -3  -4 -10  132.72    7.36 
  -3  -4 -10  110.12    5.04 
  -3   4  10  120.78    5.48 
  -3  -4 -10  123.16    5.29 
  -3   4  10  122.02    5.36 
  -3   4 -11    6.17    3.35 
  -3  -4  11    5.81    1.55 
   3  -4 -11    0.37    2.67 
  -3   4 -11    3.91    4.56 
   3  -4 -11    4.14    1.81 
  -3  -4  11    3.01    1.36 
  -3  -4  11    5.51    1.03 
  -3   4 -11    7.40    2.31 
   3  -4  11    4.50    1.14 
   3   4 -11    1.72    1.97 
  -3  -4 -11    2.77    1.42 
  -3  -4 -11    4.20    1.33 
  -3   4  11    3.01    1.20 
   3   4 -11    4.24    3.16 
   3  -4  11    4.80    1.46 
  -3  -4 -11    2.77    2.37 
  -3   4  11    3.44    1.44 
  -3   4  11    6.50    1.37 
  -3   4  11    5.93    1.44 
  -3   4 -12   95.34    6.35 
   3  -4 -12   82.22    3.82 
   3  -4 -12   93.20    7.67 
  -3   4 -12   93.29    7.44 
  -3  -4  12   96.44    3.99 
  -3   4 -12   90.85    4.34 
  -3  -4  12   92.94    3.37 
  -3  -4  12   88.99    3.50 
   3  -4  12   88.71    3.08 
   3   4 -12   96.84    5.92 
   3  -4  12   83.01    3.32 
  -3  -4 -12   87.48    4.04 
  -3   4  12   86.33    3.31 
  -3  -4 -12   93.29    4.22 
  -3   4  12   90.57    3.96 
   3   4 -12   92.98    4.06 
  -3   4  12   92.73    3.56 
  -3   4 -13    7.20    3.75 
  -3   4 -13   15.13    2.99 
   3  -4 -13    9.42    3.36 
  -3   4 -13    5.51    4.08 
  -3  -4  13   14.86    1.82 
  -3  -4  13    9.55    1.28 
  -3  -4  13   11.66    1.88 
  -3  -4  13   10.16    1.14 
   3  -4 -13   12.34    2.08 
   3  -4  13   12.92    1.69 
   3   4 -13    9.18    2.20 
  -3  -4 -13    8.08    1.84 
  -3   4  13   11.16    1.54 
   3   4 -13    6.13    4.27 
  -3  -4 -13   10.63    1.70 
  -3   4  13    9.75    2.19 
   3  -4  13   12.28    1.59 
  -3   4  13   10.37    1.53 
  -3  -4  14   38.14    2.28 
  -3  -4  14   41.09    2.33 
  -3  -4  14   41.76    2.69 
  -3   4 -14   37.66    3.04 
   3  -4 -14   37.10    2.54 
  -3  -4  14   40.41    2.50 
   3  -4  14   37.87    2.52 
  -3  -4 -14   43.18    2.82 
  -3   4  14   37.94    2.09 
   3   4 -14   42.37    2.75 
  -3  -4 -14   40.74    2.93 
  -3   4  14   47.03    3.11 
   3  -4  14   40.86    2.19 
  -3   4  14   41.44    2.45 
   3  -4 -15   85.01    3.87 
  -3  -4  15   78.42    3.38 
  -3  -4  15   83.01    3.99 
   3   4  15   78.43    3.88 
  -3   4 -15   83.65    4.39 
  -3  -4  15   77.88    3.40 
   3  -4 -15   70.30    3.81 
   3  -4  15   77.64    3.42 
   3   4 -15   83.00    4.03 
  -3  -4 -15   79.05    4.02 
   3  -4  15   76.29    3.56 
  -3  -4 -15   78.50    4.10 
  -3   4  15   80.90    4.18 
  -3   4  15   80.89    3.54 
  -3  -4  16    5.97    1.38 
   3   4  16    5.67    1.86 
   3  -4 -16   10.20    1.85 
  -3   4 -16    5.59    2.42 
   3  -4 -16    5.35    2.04 
  -3  -4  16    4.50    1.98 
  -3  -4 -16    4.36    2.42 
   3   4 -16    5.28    2.39 
  -3   4  16    5.01    1.67 
   3  -4  16    6.16    1.35 
  -3  -4 -16    6.04    1.98 
  -3   4  16    5.16    1.88 
  -3  -4  17    6.20    1.11 
  -3   4 -17   10.53    2.00 
   3  -4 -17   11.10    2.33 
  -3  -4  17    8.94    2.01 
   3  -4  17    3.64    1.29 
  -3  -4 -17    8.40    2.21 
  -3   4  17    5.12    1.93 
   3   4 -17    8.46    2.16 
  -3  -4 -17    5.24    2.07 
  -3  -4  18    0.47    1.18 
   3  -4 -18   -1.68    2.19 
  -3  -4  18    3.86    1.59 
  -3   4 -18    3.41    2.89 
   3  -4  18    1.06    1.58 
  -3  -4 -18   -0.36    1.91 
  -3   4  18    1.98    1.22 
   3   4 -18    1.34    2.58 
  -3  -4  19    9.20    1.57 
   3  -4 -19    7.86    2.39 
  -3   4 -19   11.84    2.49 
  -3  -4  19    9.39    1.70 
  -3   4  19    9.47    1.78 
   3  -4  19   11.00    1.76 
   3   4 -19   11.64    2.85 
  -3  -4  20    3.67    1.45 
   3  -4 -20    7.14    2.05 
  -3   4 -20    4.94    2.17 
  -3  -4  20    4.76    2.03 
  -3   4  20    3.71    1.81 
   3  -4  20    3.95    1.74 
   3   4 -20    3.78    2.82 
  -3   5   0  434.10   16.87 
  -3  -5   1   79.11    7.48 
  -3   5  -1   93.71    5.94 
  -3   5   1   78.19    5.08 
   3  -5  -2   10.10    3.12 
  -3  -5   2    9.68    2.71 
  -3   5  -2   12.23    3.79 
  -3   5   2   11.40    3.24 
  -3   5  -3  641.50   23.91 
   3  -5  -3  543.67   19.66 
  -3   5   3  601.40   21.91 
   3   5  -3  633.09   22.82 
  -3   5  -4  367.00   10.84 
   3  -5  -4  319.98   12.37 
   3   5  -4  321.84   12.98 
  -3   5   4  345.98   13.45 
  -3  -5  -4  316.52   12.62 
  -3   5  -5   40.31    4.16 
   3  -5  -5   40.35    3.90 
   3   5  -5   34.37    3.45 
  -3   5   5   41.19    3.88 
  -3  -5  -5   33.29    3.49 
  -3   5  -6   86.56    7.07 
   3  -5  -6   81.53    5.98 
   3   5  -6   91.88    6.94 
  -3   5   6   81.85    6.16 
  -3  -5  -6   82.41    6.24 
   3  -5  -7   14.59    3.10 
  -3   5  -7   17.32    4.65 
   3   5  -7   14.55    3.33 
   3  -5  -8   18.12    3.67 
   3   5  -8   13.15    3.15 
  -3   5  -9   23.09    2.99 
  -3  -5   9   32.64    1.92 
   3  -5  -9   33.75    3.37 
  -3  -5   9   29.67    1.88 
  -3  -5   9   26.08    1.66 
   3  -5  -9   28.17    1.78 
  -3   5  -9   32.19    2.78 
   3  -5   9   28.64    1.67 
  -3  -5  -9   35.22    2.27 
  -3   5   9   33.00    1.82 
  -3   5   9   33.37    1.89 
  -3  -5  -9   29.73    2.21 
  -3   5   9   33.92    2.38 
   3   5  -9   24.22    4.00 
  -3   5 -10   95.20    6.05 
  -3  -5  10   82.65    3.20 
   3  -5 -10   76.83    5.18 
   3  -5 -10   82.11    3.60 
  -3  -5  10   81.97    3.23 
  -3  -5  10   80.79    3.43 
  -3   5 -10   81.99    3.92 
   3   5 -10   78.60    5.49 
  -3   5  10   77.98    3.18 
   3  -5  10   83.28    3.16 
  -3   5  10   91.34    3.45 
  -3   5  10   88.39    3.63 
  -3  -5 -10   77.40    3.57 
  -3   5  10   88.96    4.22 
  -3  -5 -10   79.85    3.36 
  -3   5  10   76.36    3.54 
  -3   5 -11   45.91    4.71 
  -3  -5  11   49.57    3.01 
   3  -5 -11   47.44    4.70 
  -3   5 -11   41.11    5.59 
  -3  -5  11   44.17    2.29 
  -3  -5  11   48.25    2.50 
   3  -5 -11   51.34    2.80 
  -3  -5  11   49.90    2.52 
  -3   5 -11   51.64    3.34 
   3  -5  11   48.53    2.32 
   3   5 -11   44.39    2.84 
  -3  -5 -11   44.76    2.44 
  -3  -5 -11   50.56    2.82 
   3   5 -11   43.64    4.02 
  -3   5  11   51.28    2.82 
  -3   5  11   48.09    2.24 
  -3  -5 -11   51.65    3.41 
  -3   5  11   43.91    3.14 
  -3   5  11   54.48    2.78 
  -3   5  11   50.70    2.67 
  -3   5 -12   14.11    3.13 
  -3   5 -12   17.44    2.35 
   3  -5 -12   13.97    3.87 
  -3   5 -12   11.86    4.51 
  -3  -5  12   13.76    1.84 
  -3  -5  12   11.35    1.47 
  -3  -5  12   15.18    1.79 
   3  -5 -12   15.31    1.98 
   3  -5  12   17.15    1.51 
   3   5 -12   12.37    2.13 
  -3  -5 -12   11.61    2.09 
  -3   5  12   17.30    2.09 
  -3   5  12   15.25    2.04 
   3   5 -12    9.96    4.20 
  -3  -5 -12   13.78    2.31 
  -3   5  12   14.06    2.48 
   3  -5  12   17.23    1.57 
  -3   5  12   16.13    1.86 
  -3  -5  13   19.59    2.06 
  -3  -5  13   20.52    1.58 
   3  -5 -13   18.94    2.01 
  -3  -5  13   15.38    1.83 
  -3   5 -13   14.77    2.29 
   3  -5  13   20.03    1.46 
   3   5 -13   17.56    2.54 
   3  -5  13   19.36    1.46 
  -3   5  13   17.10    2.00 
  -3  -5 -13   23.40    2.11 
  -3   5  13   17.74    2.19 
  -3  -5 -13   25.32    2.55 
  -3   5  13   17.92    1.81 
   3  -5 -14  109.60    4.77 
  -3  -5  14   98.93    3.95 
  -3  -5  14  103.90    4.67 
  -3   5 -14  109.07    5.41 
  -3  -5  14  101.43    4.25 
   3  -5 -14  108.50    4.75 
   3  -5  14  110.10    4.45 
  -3  -5 -14  110.03    5.14 
   3   5 -14  106.27    4.90 
  -3   5  14  111.06    4.81 
   3  -5  14  107.32    4.79 
  -3   5  14   97.61    4.84 
  -3   5  14  100.56    4.36 
   3  -5 -15   23.62    2.48 
  -3  -5  15   28.23    1.91 
  -3  -5  15   26.81    2.80 
  -3   5 -15   21.53    2.74 
  -3  -5  15   25.20    1.93 
   3  -5 -15   19.72    2.38 
   3  -5  15   24.37    1.74 
  -3  -5 -15   21.95    2.41 
   3   5 -15   25.91    2.76 
  -3   5  15   25.03    2.07 
   3  -5  15   24.51    2.20 
  -3  -5 -15   21.19    2.07 
  -3   5  15   22.65    2.76 
  -3   5 -16   21.91    3.10 
  -3  -5  16   19.64    1.84 
   3  -5 -16   24.36    2.40 
  -3  -5  16   19.69    2.09 
  -3  -5  16   17.14    1.92 
   3  -5 -16   20.90    2.21 
   3  -5  16   18.46    1.70 
  -3  -5 -16   13.19    1.96 
  -3   5  16   18.02    1.84 
   3  -5  16   15.09    1.99 
   3   5 -16   15.82    2.59 
  -3  -5 -16   21.45    2.21 
  -3   5  16   20.44    2.67 
  -3  -5  17    7.84    1.10 
   3  -5 -17   10.06    2.19 
   3  -5 -17    9.90    2.06 
  -3  -5  17    5.13    1.79 
  -3   5 -17    8.29    2.66 
   3  -5  17    8.93    1.75 
  -3   5  17   10.49    2.14 
  -3  -5 -17    8.57    2.15 
   3   5 -17    9.05    2.70 
  -3  -5 -17    9.65    2.13 
  -3  -5  18    1.57    1.13 
   3  -5 -18   -3.19    1.92 
   3  -5 -18    0.40    1.98 
  -3  -5  18    1.41    1.80 
  -3   5 -18    0.64    2.30 
   3  -5  18    2.39    1.67 
  -3   5  18    0.09    1.94 
  -3  -5 -18    2.71    1.93 
   3   5 -18   -0.64    2.65 
  -3  -5 -18    3.11    2.40 
  -3  -5  19    2.31    1.15 
   3  -5 -19    4.38    2.05 
   3  -5 -19    4.75    2.00 
  -3  -5  19    2.77    1.91 
  -3   5 -19    2.09    2.23 
   3  -5  19    3.46    1.86 
  -3   5  19    1.62    1.82 
  -3  -5 -19    2.14    2.06 
   3   5 -19    2.12    2.99 
  -3  -5  20    0.98    1.43 
   3  -5 -20    2.85    2.35 
  -3   5 -20    0.73    2.13 
   3  -5 -20    3.07    2.14 
   3  -5  20    2.70    1.58 
  -3   5  20    2.46    1.94 
  -3  -5 -20    0.92    2.29 
   3  -6   0 2680.63   47.99 
  -3   6   0 2845.63   51.92 
   3  -6  -1  128.67    6.42 
  -3   6  -1  112.91    6.02 
   3  -6   1  123.24    5.68 
  -3   6   1  119.78    6.35 
   3  -6  -2   71.01    4.63 
  -3   6  -2   76.99    5.24 
   3  -6   2   70.44    4.46 
  -3   6   2   66.10    4.65 
   3  -6  -3  215.40    7.64 
  -3   6  -3  234.47   10.33 
   3  -6   3  230.80   10.32 
  -3   6   3  207.28    8.60 
   3  -6  -4   41.26    3.78 
  -3   6  -4   37.40    4.79 
  -3  -6   4   42.44    3.75 
  -3   6   4   47.93    3.85 
   3  -6   4   36.59    3.54 
   3  -6  -5  112.27    7.68 
  -3   6  -5  103.52    7.63 
   3   6  -5  110.96    7.75 
   3  -6   5  107.95    7.53 
  -3   6   5  109.10    7.65 
   3  -6  -6  133.82    7.34 
  -3   6  -6  108.32    7.82 
   3   6  -6  116.78    6.95 
   3  -6   6  112.41    7.81 
  -3   6   6  105.02    7.23 
  -3   6  -7   98.50    7.29 
   3  -6  -7   99.73    7.10 
   3  -6   7   84.95    6.89 
   3   6  -7   99.72    7.27 
   3  -6  -8  126.08    6.89 
  -3   6  -8  118.51    7.65 
  -3  -6   8  108.91    4.48 
   3  -6  -8  102.74    4.34 
  -3  -6   8  105.79    4.39 
   3   6  -8  109.05    6.67 
   3  -6   8  113.11    4.55 
   3  -6   8  105.73    4.62 
  -3  -6  -8  118.77    5.26 
  -3   6   8  104.51    4.21 
  -3   6   8  108.54    4.67 
  -3   6   8  115.74    5.72 
  -3  -6   9   35.52    1.73 
   3  -6  -9   34.57    4.18 
  -3   6  -9   41.60    4.45 
  -3  -6   9   34.68    1.49 
   3  -6  -9   39.76    2.09 
  -3  -6   9   31.46    1.74 
   3  -6   9   33.70    1.67 
   3   6  -9   32.72    3.82 
  -3  -6  -9   37.90    2.39 
  -3   6   9   33.03    1.92 
  -3   6   9   36.65    2.63 
  -3   6   9   31.48    1.38 
   3  -6 -10   14.50    2.84 
  -3   6 -10    9.35    4.55 
  -3  -6  10   11.82    1.53 
  -3  -6  10   10.38    1.33 
   3  -6 -10    9.09    1.35 
  -3  -6  10   11.26    1.63 
  -3  -6 -10   13.71    1.55 
  -3  -6 -10   10.77    1.50 
   3  -6  10   15.37    1.45 
  -3   6  10   12.46    1.74 
  -3   6  10   13.93    2.36 
  -3   6  10   13.86    1.30 
   3  -6 -11   33.08    3.95 
  -3   6 -11   30.77    4.02 
  -3  -6  11   31.63    2.13 
  -3  -6  11   26.36    1.66 
   3  -6 -11   29.80    2.36 
  -3  -6  11   27.00    2.03 
  -3  -6 -11   34.38    2.72 
  -3   6  11   27.52    1.95 
   3  -6  11   30.75    2.02 
  -3  -6 -11   30.34    2.88 
  -3   6  11   32.05    3.03 
  -3   6  11   28.33    2.14 
   3  -6 -12  172.30   10.62 
  -3  -6  12  184.31    6.72 
  -3  -6  12  199.15    6.41 
   3  -6 -12  198.44    6.82 
  -3  -6  12  188.34    6.12 
   3   6 -12  175.94    6.56 
  -3  -6 -12  188.85    6.72 
   3  -6  12  182.21    6.12 
  -3   6  12  199.48    7.07 
  -3  -6 -12  191.29    7.29 
  -3   6  12  186.20    6.86 
   3  -6 -13    2.19    1.64 
  -3  -6  13    0.08    1.24 
   3  -6 -13   -1.30    1.82 
  -3  -6  13    1.95    1.49 
  -3  -6  13   -0.11    0.98 
  -3  -6 -13   -1.65    2.01 
   3  -6  13    0.97    0.99 
  -3   6  13    3.07    1.95 
   3   6 -13    1.52    2.26 
  -3  -6 -13   -1.85    1.68 
  -3   6  13    2.52    2.26 
  -3  -6  14   30.76    2.09 
   3  -6 -14   31.38    2.43 
  -3  -6  14   34.32    2.50 
   3  -6 -14   35.57    2.75 
   3  -6  14   32.00    1.87 
  -3  -6 -14   27.47    2.47 
  -3   6  14   36.21    2.40 
   3   6 -14   30.25    3.23 
  -3  -6 -14   34.52    2.87 
  -3   6  14   26.33    3.04 
   3  -6 -15    1.17    1.96 
   3  -6 -15    4.54    1.87 
  -3  -6  15    6.51    2.02 
  -3  -6  15    6.13    1.52 
  -3  -6 -15    7.99    1.70 
  -3  -6 -15    9.67    1.99 
   3  -6  15    4.37    1.34 
  -3   6  15    7.78    1.42 
   3   6 -15    5.08    2.39 
  -3  -6 -15    7.85    2.39 
   3  -6 -16   17.58    2.28 
  -3  -6  16   15.74    1.51 
   3  -6 -16   12.77    2.09 
  -3  -6  16   12.99    1.80 
  -3  -6  16   13.94    1.60 
  -3  -6 -16   12.80    2.38 
   3  -6  16   13.44    1.63 
  -3   6  16    9.37    1.86 
   3   6 -16   11.09    3.20 
  -3  -6 -16    8.83    2.37 
  -3  -6  17   10.65    1.97 
  -3  -6  17   12.74    1.51 
   3  -6 -17   12.62    1.89 
   3  -6 -17   11.01    2.24 
   3  -6  17   11.22    1.98 
  -3  -6 -17    7.52    1.69 
  -3   6  17   12.39    1.78 
   3   6 -17   11.18    2.93 
  -3  -6 -17   13.97    2.38 
  -3  -6  18   13.10    1.28 
   3  -6 -18   10.06    2.21 
  -3  -6  18   12.13    2.04 
   3  -6 -18   11.63    2.17 
  -3  -6 -18    8.77    2.24 
  -3   6  18   10.84    1.91 
   3   6 -18   11.86    2.93 
  -3  -6 -18   10.25    2.07 
  -3  -6  19    0.72    1.33 
   3  -6 -19    0.80    2.06 
   3  -6 -19    0.79    2.13 
  -3  -6 -19   -0.13    2.07 
  -3   6  19    1.24    1.94 
  -3   6 -20   18.88    3.12 
   3  -7   0    3.64    2.67 
  -3   7   0    6.25    3.46 
   3  -7  -1  541.90   21.14 
  -3   7  -1  493.93   20.06 
   3  -7   1  564.97   22.04 
  -3   7   1  598.17   23.54 
   3  -7  -2  566.81   22.39 
  -3   7  -2  576.74   22.97 
   3  -7   2  575.18   22.46 
  -3   7   2  558.12   22.03 
   3  -7  -3  409.68   16.68 
  -3   7  -3  429.11   18.05 
   3  -7   3  432.39   17.80 
  -3   7   3  413.28   17.11 
   3  -7  -4   43.66    4.03 
  -3   7  -4   47.98    4.60 
   3  -7   4   54.42    4.25 
  -3   7   4   52.89    4.51 
   3  -7  -5   -0.39    1.95 
  -3   7  -5   -2.17    3.09 
   3  -7   5    4.15    3.37 
  -3   7   5    2.83    2.61 
   3  -7  -6   80.12    5.79 
   3  -7  -6   72.63    4.22 
  -3   7  -6   70.43    6.15 
  -3   7  -6   72.67    4.79 
  -3  -7   6   68.85    3.98 
   3  -7   6   75.29    6.39 
   3  -7   6   64.77    4.02 
  -3  -7  -6   70.00    4.25 
  -3   7   6   66.32    4.12 
   3  -7   6   65.90    3.86 
   3  -7  -7  140.81    7.21 
  -3  -7   7  116.04    4.74 
  -3   7  -7  121.79    7.63 
  -3  -7   7  116.04    4.70 
   3  -7  -7  119.58    4.88 
  -3   7  -7  126.61    5.54 
   3  -7   7  111.73    4.61 
   3  -7   7  122.35    5.03 
   3  -7   7  123.55    6.99 
  -3   7   7  118.05    4.67 
  -3   7   7  112.26    4.82 
  -3  -7  -7  118.19    5.22 
  -3   7   7  118.75    5.32 
   3  -7  -8    5.16    3.20 
  -3  -7   8    7.64    1.36 
  -3   7  -8    8.49    2.96 
  -3   7  -8    8.09    2.00 
   3  -7  -8   10.61    1.47 
   3  -7   8   10.15    1.18 
   3  -7   8    9.15    1.61 
   3  -7   8   10.61    3.81 
  -3   7   8    9.08    0.98 
  -3   7   8    7.53    1.67 
  -3  -7  -8    6.24    1.70 
  -3   7   8    9.57    2.45 
   3  -7  -9    5.66    2.31 
  -3  -7   9   12.36    1.41 
  -3   7  -9   14.38    3.19 
  -3  -7   9   10.06    1.35 
   3  -7  -9    9.48    1.50 
  -3   7  -9   10.49    1.66 
   3  -7   9   11.40    1.33 
   3  -7   9   10.16    1.41 
   3  -7   9   13.95    2.99 
  -3   7   9    9.25    1.30 
  -3   7   9   11.22    1.67 
  -3  -7  -9   12.54    2.11 
  -3   7   9   10.61    2.40 
   3  -7 -10    8.58    3.67 
  -3  -7  10    9.29    1.56 
  -3   7 -10    3.66    4.08 
  -3  -7  10    5.96    1.32 
   3  -7 -10    8.44    1.72 
  -3   7 -10    7.09    2.26 
   3  -7  10    5.69    1.23 
   3  -7  10    6.11    1.82 
   3  -7  10    0.51    3.11 
  -3   7  10    5.94    1.26 
  -3   7  10    6.00    1.77 
  -3  -7 -10    5.16    1.99 
  -3   7  10    6.68    2.16 
   3  -7 -11   28.60    3.84 
  -3  -7  11   34.72    2.05 
  -3   7 -11   34.57    4.79 
  -3   7 -11   29.90    2.58 
  -3  -7  11   35.38    2.08 
   3  -7  11   37.03    3.98 
   3  -7  11   31.40    2.02 
  -3  -7 -11   28.63    2.38 
  -3   7  11   34.65    2.04 
   3  -7  11   29.76    1.71 
  -3  -7 -11   23.96    2.58 
  -3   7  11   31.08    2.73 
   3  -7 -12   38.37    2.83 
  -3  -7  12   37.68    2.37 
   3  -7 -12   35.95    2.41 
  -3  -7  12   40.55    2.39 
  -3   7 -12   35.38    2.98 
   3  -7  12   38.89    2.67 
   3  -7  12   43.77    2.27 
  -3   7  12   38.26    2.45 
  -3  -7 -12   39.23    2.93 
  -3  -7 -12   39.86    3.08 
  -3   7  12   36.80    2.84 
   3  -7 -13   22.98    1.92 
  -3  -7  13   18.59    1.58 
   3  -7 -13   21.67    2.36 
  -3  -7  13   19.37    1.84 
  -3   7 -13   28.41    2.75 
   3  -7  13   20.72    1.64 
   3  -7  13   21.96    1.54 
  -3   7  13   23.97    2.16 
  -3  -7 -13   17.99    2.27 
  -3  -7 -13   14.80    2.75 
  -3   7  13   22.20    2.66 
  -3  -7  14   59.91    2.95 
   3  -7 -14   62.95    3.74 
  -3  -7  14   69.04    3.72 
  -3  -7  14   61.90    3.44 
  -3   7 -14   54.57    3.83 
   3  -7 -14   57.14    3.51 
   3  -7  14   64.31    3.23 
   3  -7  14   69.72    3.67 
  -3  -7 -14   60.95    3.33 
  -3   7  14   66.81    3.73 
  -3  -7 -14   57.49    3.86 
   3   7 -14   50.01    3.80 
  -3  -7 -14   67.19    4.51 
  -3  -7  15   22.41    1.95 
   3  -7 -15   21.03    2.08 
  -3  -7  15   24.53    1.90 
   3  -7 -15   26.88    2.39 
   3  -7  15   26.56    1.88 
   3  -7  15   28.10    1.81 
  -3  -7 -15   22.44    1.86 
  -3  -7 -15   26.85    2.41 
  -3   7  15   24.62    2.28 
   3   7 -15   24.82    2.93 
  -3  -7 -15   25.90    2.83 
   3  -7 -16   11.39    2.00 
   3  -7 -16   11.41    2.27 
  -3  -7  16   11.59    1.93 
  -3  -7  16   12.78    1.52 
   3  -7  16   10.89    1.69 
  -3  -7 -16   10.08    2.22 
   3  -7  16   13.21    1.50 
  -3   7  16   14.54    2.00 
   3   7 -16   13.74    2.88 
  -3  -7 -16   10.39    2.17 
  -3  -7  17    1.52    1.25 
   3  -7 -17    1.96    1.77 
   3  -7 -17    3.30    2.15 
   3  -7  17    2.78    1.56 
   3  -7  17    1.46    1.50 
  -3  -7 -17    1.40    1.77 
  -3   7  17    2.54    1.59 
  -3  -7 -17    5.25    2.31 
  -3  -7  18   22.45    1.45 
   3  -7 -18   23.44    2.26 
   3  -7 -18   18.58    2.28 
  -3  -7 -18   16.83    2.28 
  -3   7  18   19.30    1.92 
  -3  -7 -18   18.32    2.49 
  -3  -7  19    0.10    1.27 
   3  -7 -19    0.11    2.19 
   3  -7 -19   -0.31    2.22 
  -3  -7 -19    0.67    2.52 
  -3   7  19   -0.18    2.19 
   3  -8   0  348.09   14.35 
  -3   8   0  347.10   15.02 
   3  -8  -1  377.21   15.55 
  -3   8  -1  338.65   15.57 
   3  -8   1  343.78   14.47 
  -3   8   1  394.47   16.17 
   3  -8  -2    7.01    2.99 
  -3   8  -2    3.10    2.96 
   3  -8   2    6.61    3.47 
  -3   8   2    5.54    3.09 
   3  -8  -3  120.33    6.94 
  -3   8  -3  125.32    7.10 
   3  -8   3  115.38    6.47 
  -3   8   3  109.40    7.64 
   3  -8   3  100.57    5.52 
  -3  -8  -3   92.22    5.46 
   3  -8  -4   21.76    3.83 
  -3  -8   4   20.90    1.52 
   3  -8  -4   20.63    1.60 
  -3   8  -4   23.36    3.79 
  -3   8  -4   17.31    2.09 
  -3   8   4   23.40    3.59 
   3  -8   4   20.04    1.85 
   3  -8   4   29.54    4.20 
  -3  -8  -4   19.30    1.92 
  -3   8   4   23.73    1.99 
   3  -8   4   19.53    1.52 
  -3   8   4   22.06    2.63 
   3  -8  -5    4.07    2.28 
   3  -8  -5    5.45    1.08 
  -3   8  -5    7.79    2.87 
  -3   8  -5    4.82    1.66 
  -3  -8   5    5.09    0.95 
   3  -8   5    3.64    3.68 
   3  -8   5    4.87    1.47 
  -3  -8  -5    5.13    1.53 
  -3   8   5    7.36    1.58 
   3  -8   5    5.43    0.99 
  -3   8   5    5.38    2.28 
   3  -8  -6   51.52    4.29 
   3  -8  -6   58.67    2.64 
  -3   8  -6   62.22    5.89 
  -3  -8   6   57.96    2.78 
  -3  -8   6   54.93    2.38 
  -3   8  -6   63.34    2.53 
   3  -8   6   53.87    4.35 
   3  -8   6   62.88    2.21 
  -3  -8  -6   61.81    3.11 
  -3   8   6   55.93    2.58 
  -3   8   6   55.20    3.45 
   3  -8  -7   17.75    3.33 
   3  -8  -7   21.04    1.79 
  -3   8  -7   21.78    3.33 
  -3  -8   7   18.26    1.47 
  -3  -8   7   18.88    1.29 
  -3   8  -7   28.27    2.54 
   3  -8   7   24.50    4.11 
   3  -8   7   20.42    1.93 
  -3  -8  -7   20.14    1.99 
  -3   8   7   23.66    2.15 
  -3   8   7   22.12    2.67 
   3  -8  -8   81.30    5.52 
  -3  -8   8   72.55    3.17 
  -3   8  -8   71.14    5.73 
  -3  -8   8   70.61    2.90 
   3  -8  -8   71.31    3.19 
  -3   8  -8   77.36    3.70 
   3  -8   8   78.17    3.21 
   3  -8   8   70.44    3.12 
  -3   8   8   73.87    3.14 
  -3   8   8   81.44    3.64 
   3  -8   8   71.94    5.31 
  -3   8   8   73.37    3.92 
   3  -8  -9   30.48    4.01 
  -3  -8   9   32.53    1.94 
  -3   8  -9   31.16    4.83 
  -3   8  -9   36.79    3.15 
   3  -8  -9   31.07    2.27 
   3  -8   9   38.38    4.89 
   3  -8   9   36.19    2.44 
  -3   8   9   37.33    2.20 
  -3   8   9   32.26    2.49 
   3  -8   9   35.05    1.92 
  -3   8   9   33.10    3.11 
   3  -8 -10   71.11    5.26 
  -3  -8  10   71.13    2.85 
  -3   8 -10   67.91    6.32 
  -3  -8  10   77.34    3.08 
   3  -8 -10   79.44    3.37 
  -3   8 -10   80.69    3.72 
   3  -8  10   76.24    3.08 
   3  -8  10   76.53    3.18 
  -3   8  10   75.77    3.21 
  -3   8  10   75.47    3.16 
   3  -8  10   75.40    5.44 
  -3   8  10   73.91    4.06 
   3  -8 -11   63.40    3.37 
  -3  -8  11   60.33    2.79 
   3  -8 -11   55.74    3.07 
  -3  -8  11   62.62    3.18 
  -3   8 -11   64.52    3.87 
   3  -8  11   64.77    3.17 
   3  -8  11   68.68    3.06 
  -3   8  11   57.28    2.97 
  -3  -8 -11   57.70    3.21 
  -3   8  11   58.16    3.69 
   3  -8 -12   32.01    2.56 
  -3  -8  12   30.97    1.97 
   3  -8 -12   34.14    2.64 
  -3  -8  12   27.54    1.94 
  -3   8 -12   35.82    2.70 
   3  -8  12   31.94    2.30 
   3  -8  12   35.42    2.02 
  -3   8  12   36.80    2.62 
  -3  -8 -12   34.95    2.63 
  -3   8  12   31.88    2.73 
  -3   8 -13    2.23    2.39 
  -3  -8  13    7.49    1.24 
   3  -8 -13    2.96    1.88 
  -3  -8  13    2.32    1.46 
   3  -8 -13    2.46    1.85 
   3  -8  13    3.34    1.35 
  -3  -8 -13    3.92    1.71 
  -3  -8 -13    7.64    2.19 
  -3   8  13    3.09    1.75 
   3  -8  13    3.18    1.77 
  -3  -8 -13    7.58    1.71 
  -3   8 -14    0.25    2.21 
  -3  -8  14    2.33    1.24 
   3  -8 -14   -2.09    1.80 
  -3  -8  14   -1.08    1.36 
   3  -8 -14   -1.04    1.91 
   3  -8  14    2.69    1.36 
  -3  -8 -14    1.31    1.45 
  -3  -8 -14    1.05    2.08 
  -3   8  14    3.61    1.77 
   3  -8  14    1.66    1.56 
  -3  -8 -14   -2.27    2.58 
  -3   8 -15    2.95    2.65 
  -3  -8  15    5.73    1.35 
   3  -8 -15    6.81    2.10 
  -3  -8  15    6.75    1.46 
   3  -8 -15    3.30    1.88 
   3  -8  15    3.65    1.42 
  -3  -8 -15    7.21    1.67 
  -3  -8 -15    4.80    2.07 
  -3   8  15    6.90    1.75 
   3  -8  15    6.13    1.99 
  -3  -8 -15    5.05    2.28 
  -3  -8  16   13.47    1.45 
   3  -8 -16   16.98    2.17 
  -3   8 -16   14.90    2.39 
   3  -8 -16   13.98    2.20 
   3  -8  16   16.85    1.62 
   3  -8  16   18.79    1.79 
  -3   8  16   14.61    1.54 
  -3  -8 -16   12.92    2.20 
  -3  -8 -16   16.24    2.24 
   3  -8 -17    2.31    1.94 
  -3   8 -17    4.95    2.21 
   3  -8 -17    4.52    2.27 
   3  -8  17    4.99    1.57 
  -3   8  17    3.94    1.61 
  -3  -8 -17    3.08    2.07 
  -3  -8 -17    5.28    2.02 
   3  -8 -18   -2.02    2.12 
  -3   8 -18   -0.28    2.28 
   3  -8 -18   -0.53    2.42 
   3  -8  18    0.20    1.64 
  -3   8  18   -1.16    2.28 
  -3  -8 -18    1.92    2.52 
  -3  -8 -18   -0.55    2.04 
  -3   9   0   11.97    3.64 
   3  -9   0   10.67    1.49 
  -3  -9   0   11.08    1.70 
  -3   9   0   12.40    1.50 
   3  -9  -1   75.71    4.98 
  -3  -9   1   66.14    2.93 
  -3   9  -1   62.19    5.16 
   3  -9  -1   64.14    2.09 
  -3   9  -1   62.92    2.41 
  -3   9   1   68.97    5.31 
   3  -9   1   67.47    3.17 
   3  -9   1   66.01    4.11 
  -3   9   1   66.74    3.39 
  -3  -9  -1   66.46    2.66 
   3  -9  -2   12.30    3.30 
  -3   9  -2   21.43    4.36 
   3  -9  -2   12.53    1.58 
  -3   9  -2   16.42    1.94 
  -3  -9   2   11.83    1.81 
   3  -9   2   15.69    3.93 
   3  -9   2   19.38    1.84 
  -3   9   2   16.58    2.01 
  -3  -9  -2   14.43    1.94 
  -3   9   2   17.40    2.13 
   3  -9  -3  117.06    6.63 
  -3  -9   3  103.82    5.24 
  -3   9  -3  123.16    8.43 
   3  -9  -3  110.69    4.61 
  -3  -9   3  117.34    4.81 
  -3   9  -3  112.93    5.16 
   3  -9   3  122.48    4.97 
   3  -9   3  121.29    8.90 
  -3   9   3  111.43    4.74 
  -3  -9  -3  120.41    5.11 
  -3   9   3  123.72    5.62 
   3  -9  -4   85.80    5.45 
   3  -9  -4   92.63    3.69 
  -3   9  -4   95.26    5.84 
  -3   9  -4   91.74    4.06 
  -3  -9   4   93.97    3.66 
   3  -9   4   95.92    6.02 
   3  -9   4  102.09    4.06 
  -3  -9  -4   91.96    3.80 
  -3   9   4  103.45    4.24 
   3  -9   4   98.29    3.67 
  -3   9   4  104.33    4.98 
   3  -9  -5  223.58    9.79 
  -3   9  -5  251.81   11.25 
   3  -9  -5  234.97    7.72 
  -3  -9   5  240.83    7.67 
  -3   9  -5  265.06    9.25 
   3  -9   5  237.96    7.99 
  -3  -9  -5  251.05    8.24 
  -3   9   5  235.06    7.91 
  -3   9   5  271.29    9.68 
   3  -9  -6   27.03    3.61 
  -3   9  -6   30.71    4.96 
  -3   9  -6   31.05    2.41 
  -3  -9   6   27.10    1.51 
   3  -9  -6   29.50    2.02 
   3  -9   6   30.43    1.99 
  -3  -9  -6   31.24    2.07 
  -3   9   6   34.26    2.27 
   3  -9   6   28.26    1.50 
  -3   9   6   32.34    2.83 
   3  -9  -7  476.24   18.47 
   3  -9  -7  495.67   13.70 
  -3   9  -7  435.60   16.58 
  -3  -9   7  480.61   13.17 
  -3   9  -7  482.16   14.42 
  -3  -9   7  495.28   13.87 
   3  -9   7  516.19   17.92 
  -3   9   7  475.10   13.25 
   3  -9   7  461.31   13.23 
  -3   9   7  468.62   14.15 
   3  -9  -8   50.82    5.83 
   3  -9  -8   54.55    2.73 
  -3   9  -8   58.83    5.37 
  -3  -9   8   62.69    2.69 
  -3   9  -8   55.54    3.29 
  -3  -9   8   53.46    2.44 
   3  -9   8   63.19    5.35 
  -3   9   8   59.80    3.00 
   3  -9   8   54.61    2.77 
  -3   9   8   60.04    3.58 
   3  -9  -9   34.14    4.54 
  -3  -9   9   35.29    2.49 
  -3   9  -9   41.12    5.34 
  -3   9  -9   37.24    2.95 
  -3  -9   9   36.33    1.88 
   3  -9  -9   38.56    2.52 
   3  -9   9   40.41    2.42 
   3  -9   9   39.80    5.65 
  -3   9   9   36.45    2.50 
   3  -9   9   34.10    1.50 
  -3   9   9   37.74    2.99 
  -3  -9  10    9.06    1.42 
   3  -9 -10    6.50    1.65 
  -3   9 -10    7.18    2.08 
   3  -9  10   10.28    1.43 
   3  -9  10    9.40    1.90 
  -3   9  10   10.19    1.45 
  -3   9  10    5.68    2.02 
  -3  -9  11   50.21    2.46 
   3  -9 -11   52.27    2.97 
  -3   9 -11   56.22    3.56 
   3  -9  11   51.23    2.58 
   3  -9  11   47.18    2.85 
  -3   9  11   45.30    2.64 
  -3  -9 -11   43.80    3.37 
  -3   9  11   40.17    3.12 
   3  -9 -12   14.59    2.42 
  -3  -9  12   17.97    1.61 
   3  -9 -12   15.35    2.10 
  -3  -9  12   16.32    1.82 
  -3   9 -12   14.85    2.43 
   3  -9  12   13.03    2.02 
   3  -9  12   14.97    1.42 
  -3   9  12   18.30    1.91 
  -3  -9 -12   16.28    1.60 
   3  -9 -13   45.28    2.90 
  -3  -9  13   46.16    2.24 
   3  -9 -13   40.01    2.44 
  -3  -9  13   45.17    2.40 
  -3   9 -13   40.59    3.08 
   3  -9  13   46.74    2.70 
   3  -9  13   44.08    2.51 
  -3   9  13   44.53    2.58 
  -3  -9 -13   45.66    2.65 
   3  -9 -14    2.81    2.06 
  -3  -9  14    3.60    1.33 
   3  -9 -14    2.19    2.09 
  -3  -9  14    4.22    1.32 
  -3   9 -14    1.26    2.09 
   3  -9  14    3.77    1.83 
   3  -9  14    3.70    1.75 
  -3   9  14    3.72    1.62 
  -3  -9 -14    3.95    1.50 
  -3  -9 -14    1.77    2.24 
  -3  -9  15   54.41    1.86 
   3  -9 -15   53.62    2.80 
  -3   9 -15   51.43    3.15 
   3  -9 -15   50.01    2.86 
   3  -9  15   53.26    2.47 
   3  -9  15   56.73    2.54 
  -3   9  15   49.82    2.39 
  -3  -9 -15   50.04    2.41 
  -3  -9 -15   50.00    2.40 
  -3  -9  16    8.43    1.30 
   3  -9 -16    6.10    2.05 
  -3   9 -16    7.70    2.29 
   3  -9 -16    3.83    2.41 
   3  -9 -16    8.23    2.68 
   3  -9  16    4.59    1.66 
  -3  -9 -16    4.78    1.98 
  -3   9  16    3.19    1.79 
  -3  -9  17   20.00    1.47 
   3  -9 -17   21.36    2.53 
  -3   9 -17   17.93    2.38 
  -3  -9  17   21.13    2.52 
  -3   9  17   20.32    2.15 
   3  -9  17   20.14    1.92 
  -3  -9 -17   21.70    2.16 
  -3   9 -18    4.26    3.14 
   3 -10   0    0.62    2.13 
   3 -10   0   -0.26    1.01 
  -3 -10   0    1.31    1.66 
  -3  10   0    1.34    1.52 
   3 -10  -1   17.38    3.45 
   3 -10  -1   14.26    1.60 
  -3 -10   1   15.03    1.81 
  -3  10  -1   16.62    2.08 
   3 -10   1   16.28    3.51 
   3 -10   1   14.24    1.63 
  -3 -10  -1   12.71    1.87 
   3 -10   1   13.39    2.00 
  -3  10   1   13.10    1.48 
   3 -10  -2   63.32    4.86 
   3 -10  -2   60.53    2.90 
  -3 -10   2   57.63    3.03 
  -3  10  -2   56.17    3.11 
   3 -10   2   68.21    5.18 
   3 -10   2   57.63    2.83 
  -3 -10  -2   62.32    3.20 
   3 -10   2   56.52    3.21 
  -3  10   2   55.89    2.83 
  -3  10   2   54.05    3.43 
   3 -10  -3   37.78    3.93 
  -3 -10   3   44.27    2.38 
   3 -10  -3   38.56    2.44 
  -3 -10   3   36.18    2.44 
  -3  10  -3   41.80    2.77 
   3 -10   3   46.07    4.60 
   3 -10   3   43.26    2.60 
  -3  10   3   43.32    2.60 
  -3 -10  -3   38.69    2.75 
  -3  10   3   42.17    3.34 
   3 -10  -4  203.95    8.35 
  -3  10  -4  197.94    6.52 
  -3 -10   4  182.29    6.06 
  -3 -10   4  188.50    6.33 
  -3 -10  -4  181.86    5.95 
   3 -10   4  193.60    6.05 
  -3  10   4  194.58    6.33 
   3 -10   4  209.98    8.96 
  -3  10   4  197.89    7.07 
   3 -10  -5   25.68    4.17 
  -3  10  -5   20.58    4.61 
   3 -10  -5   21.38    2.01 
  -3 -10   5   20.53    1.76 
  -3  10  -5   17.59    1.83 
   3 -10   5   24.60    4.41 
   3 -10   5   21.66    1.91 
  -3 -10  -5   22.29    1.90 
  -3  10   5   19.91    2.12 
  -3  10   5   21.47    2.25 
   3 -10  -6   55.21    4.91 
  -3 -10   6   49.29    2.58 
  -3  10  -6   40.64    5.51 
  -3  10  -6   46.86    3.07 
  -3 -10   6   45.48    2.11 
   3 -10  -6   42.10    2.44 
   3 -10   6   48.52    2.62 
   3 -10   6   44.47    5.31 
  -3  10   6   43.70    2.58 
   3 -10   6   38.50    2.16 
  -3  10   6   42.66    3.25 
   3 -10  -7    9.95    3.42 
  -3 -10   7   11.98    1.66 
  -3  10  -7    9.98    4.20 
  -3  10  -7    8.33    2.25 
  -3 -10   7   10.00    1.39 
   3 -10  -7   13.67    1.50 
   3 -10   7   12.77    1.62 
   3 -10   7    8.40    4.32 
  -3  10   7    9.49    1.64 
   3 -10   7   11.46    1.49 
  -3  10   7   12.51    3.01 
  -3  10  -8    3.62    2.26 
  -3 -10   8    4.17    1.29 
   3 -10  -8    3.92    1.18 
  -3 -10   8    8.89    1.66 
   3 -10   8    4.75    1.83 
  -3  10   8    3.73    1.90 
   3 -10   8    7.20    1.55 
  -3  10   8    6.22    2.38 
  -3 -10   9   69.38    3.04 
   3 -10  -9   70.16    3.51 
  -3  10  -9   66.81    4.01 
   3 -10   9   73.47    3.53 
  -3  10   9   76.69    3.68 
  -3  10   9   65.83    3.63 
  -3 -10  10   20.57    1.51 
   3 -10 -10   26.27    2.25 
  -3  10 -10   26.27    2.79 
  -3 -10  10   24.29    1.71 
  -3  10  10   26.60    2.29 
   3 -10  10   27.37    2.34 
  -3 -10 -10   21.77    2.72 
  -3  10  10   28.59    2.84 
  -3  10 -11   59.31    3.83 
  -3 -10  11   58.99    2.95 
   3 -10 -11   51.55    3.06 
   3 -10  11   51.69    3.16 
  -3 -10 -11   50.43    3.09 
  -3  10  11   50.66    3.01 
   3 -10  11   47.15    2.76 
  -3 -10 -11   51.07    3.90 
  -3  10 -12    5.73    1.67 
  -3 -10  12    3.55    1.03 
   3 -10 -12    5.04    1.87 
   3 -10  12    6.28    1.55 
  -3 -10 -12    6.11    1.50 
  -3  10  12    2.72    1.86 
   3 -10  12    2.25    1.36 
  -3 -10 -12    2.46    2.92 
  -3 -10  13    5.26    1.31 
   3 -10 -13    5.27    1.69 
  -3 -10  13    9.24    1.71 
  -3  10 -13    1.77    2.27 
   3 -10  13    5.48    1.42 
   3 -10  13    8.06    1.74 
  -3 -10 -13    1.72    1.48 
  -3  10  13    3.19    1.75 
  -3 -10  14   23.92    1.54 
   3 -10 -14   23.19    1.99 
  -3  10 -14   21.26    2.55 
  -3 -10 -14   19.77    1.77 
  -3  10  14   21.66    2.06 
   3 -10  14   22.38    1.92 
  -3 -10  15    8.85    1.50 
   3 -10 -15    5.59    2.31 
  -3  10 -15    6.84    2.60 
  -3 -10 -15    8.65    1.70 
  -3  10  15    7.98    1.84 
   3 -10  15    5.88    1.79 
  -3 -10 -15    9.95    2.25 
  -3 -10  16   10.25    1.23 
   3 -10 -16    9.03    2.46 
  -3  10 -16    7.08    2.11 
  -3 -10  16   10.77    2.16 
   3 -10 -16    7.65    2.68 
   3 -10  16    8.25    1.86 
  -3 -10 -16    8.05    2.08 
  -3  10  16   10.49    2.23 
  -3 -10  17    2.28    1.32 
  -3  10 -17    2.53    2.13 
   3 -10  17    2.90    1.87 
  -3 -10 -17    1.85    2.06 
   3 -11   0   22.26    3.76 
   3 -11   0   20.70    1.77 
  -3 -11   0   21.58    2.10 
   3 -11   0   15.87    1.92 
  -3  11   0   18.75    2.06 
   3 -11  -1   63.22    4.49 
   3 -11  -1   55.02    2.49 
  -3 -11   1   53.94    3.15 
  -3  11  -1   52.48    3.00 
   3 -11   1   48.78    4.66 
   3 -11   1   55.73    2.83 
  -3 -11  -1   60.37    3.18 
   3 -11   1   60.19    3.44 
  -3  11   1   62.94    3.01 
  -3  11   1   56.01    3.72 
   3 -11  -2   18.12    3.90 
   3 -11  -2   11.79    1.64 
  -3 -11   2   12.67    1.62 
  -3  11  -2   13.61    2.10 
   3 -11   2   11.99    3.56 
   3 -11   2   10.46    1.72 
  -3 -11  -2   18.72    2.07 
   3 -11   2   11.33    2.17 
  -3  11   2   11.40    1.74 
  -3  11   2   10.98    2.12 
   3 -11  -3   88.97    5.95 
  -3 -11   3   93.61    3.98 
   3 -11  -3   93.39    3.75 
  -3  11  -3   91.88    3.89 
  -3 -11   3   95.22    4.13 
   3 -11   3   93.06    6.62 
  -3 -11  -3  103.38    4.22 
   3 -11   3   99.31    4.29 
  -3  11   3   95.43    4.11 
   3 -11   3   97.25    3.93 
  -3  11   3   99.00    4.60 
   3 -11  -4    7.29    3.54 
  -3 -11   4    9.73    1.65 
   3 -11  -4    7.89    1.73 
  -3  11  -4   10.54    2.06 
  -3 -11   4    7.95    1.63 
   3 -11   4   14.43    4.15 
  -3 -11  -4   11.76    1.91 
   3 -11   4   15.30    2.13 
  -3  11   4    6.08    1.73 
   3 -11   4    7.47    1.79 
  -3  11   4    9.82    2.16 
   3 -11  -5   52.80    2.75 
  -3 -11   5   51.71    2.43 
  -3 -11   5   50.86    3.07 
  -3  11  -5   48.52    2.79 
   3 -11   5   55.13    3.04 
  -3  11   5   55.03    3.44 
  -3  11   5   49.22    3.52 
   3 -11  -6   25.48    2.09 
  -3 -11   6   22.16    1.92 
  -3 -11   6   25.26    2.40 
  -3  11  -6   22.28    2.47 
   3 -11   6   21.59    2.08 
  -3  11   6   24.07    2.28 
  -3  11   6   25.19    2.61 
   3 -11  -7  167.98    6.70 
  -3  11  -7  162.06    6.89 
  -3 -11   7  160.37    6.59 
  -3  11   7  174.38    6.76 
   3 -11   7  168.31    6.75 
  -3  11   7  169.33    7.31 
  -3 -11   8   68.10    3.01 
   3 -11  -8   70.98    3.38 
  -3  11  -8   78.21    3.91 
  -3 -11   8   77.33    3.61 
  -3  11   8   73.05    3.61 
   3 -11   8   70.70    3.38 
  -3 -11  -8   77.01    3.90 
  -3  11   8   73.39    4.28 
  -3  11  -9   24.84    2.19 
  -3 -11   9   27.65    1.89 
   3 -11  -9   25.49    2.29 
  -3 -11   9   21.41    2.06 
   3 -11   9   23.62    2.10 
  -3  11   9   26.64    2.38 
   3 -11   9   22.26    1.57 
  -3 -11  -9   22.74    2.64 
  -3  11   9   22.45    2.94 
  -3 -11  10    9.38    1.30 
   3 -11 -10    3.55    1.87 
  -3 -11  10    5.74    1.66 
  -3  11 -10    5.65    2.40 
   3 -11  10    7.12    1.61 
  -3 -11 -10    4.93    1.66 
  -3  11  10    5.48    1.90 
  -3 -11 -10    7.91    2.29 
  -3 -11  11    8.33    1.61 
   3 -11 -11    4.69    1.65 
  -3 -11  11    5.51    1.73 
  -3  11 -11   12.79    2.55 
   3 -11  11   10.46    1.70 
  -3 -11 -11    8.97    1.62 
  -3  11  11    7.97    1.76 
  -3 -11 -11    9.34    2.68 
  -3 -11  12   33.23    1.92 
   3 -11 -12   32.71    2.48 
  -3  11 -12   26.36    2.72 
  -3 -11 -12   33.67    2.24 
  -3  11  12   34.11    2.21 
   3 -11  12   33.43    2.41 
  -3 -11 -12   31.38    2.51 
  -3 -11  13   18.85    1.43 
   3 -11 -13   18.69    2.07 
  -3  11 -13   22.18    2.29 
  -3 -11 -13   21.09    1.88 
  -3  11  13   21.80    2.04 
   3 -11  13   22.77    2.02 
  -3 -11 -13   21.02    2.64 
  -3 -11  14    5.18    1.32 
   3 -11 -14    3.94    2.22 
  -3  11 -14    2.88    2.02 
  -3 -11  14    1.65    1.86 
   3 -11  14    4.26    1.73 
  -3  11  14    2.24    1.89 
  -3 -11 -14    4.39    1.33 
  -3 -11  15    0.05    1.27 
   3 -11 -15    2.78    2.47 
  -3  11 -15    0.88    1.90 
  -3 -11  15   -0.31    2.40 
   3 -11 -15    2.39    2.33 
  -3  11  15    1.34    2.14 
   3 -11  15   -0.10    1.86 
  -3 -11  16   22.87    2.49 
  -3  11 -16   21.41    2.62 
   3 -11  16   24.78    2.17 
   3 -11  16   23.33    2.53 
  -3 -11 -16   23.25    2.28 
   3 -12   0   52.75    2.79 
   3 -12   0   52.03    3.33 
  -3 -12   0   52.67    2.91 
  -3  12   0   54.10    3.17 
  -3  12   0   52.34    3.63 
   3 -12  -1   94.36    4.06 
  -3  12  -1   93.65    4.31 
   3 -12  -1   91.77    4.38 
  -3 -12   1   92.64    4.34 
  -3 -12  -1   90.44    4.27 
   3 -12   1   84.41    4.05 
  -3  12   1   83.44    3.82 
   3 -12   1   85.91    3.91 
  -3  12   1   86.92    4.72 
   3 -12  -2   17.50    1.84 
  -3 -12   2   15.34    2.19 
  -3  12  -2   15.51    2.23 
   3 -12   2   16.27    1.65 
  -3 -12  -2   14.26    1.87 
   3 -12   2   13.93    2.03 
  -3  12   2   16.84    2.13 
  -3  12   2   13.63    3.29 
   3 -12  -3   41.53    2.57 
  -3 -12   3   39.47    2.81 
  -3  12  -3   35.06    2.57 
   3 -12   3   39.32    2.47 
  -3 -12  -3   40.63    2.83 
   3 -12   3   34.60    2.74 
  -3  12   3   36.77    2.44 
  -3  12   3   38.17    3.19 
   3 -12  -4   22.29    1.86 
  -3 -12   4   16.79    1.77 
  -3 -12   4   20.14    2.07 
  -3  12  -4   26.44    2.31 
   3 -12   4   19.65    1.87 
   3 -12   4   22.38    2.36 
  -3  12   4   23.96    2.26 
  -3  12   4   21.43    2.75 
   3 -12  -5   50.48    3.00 
  -3 -12   5   51.69    2.86 
  -3 -12   5   56.30    3.36 
  -3  12  -5   44.26    2.79 
   3 -12   5   52.27    2.61 
   3 -12   5   47.58    3.07 
  -3  12   5   51.56    3.00 
  -3 -12  -5   49.67    3.45 
  -3  12   5   49.91    3.65 
   3 -12  -6   32.13    2.29 
  -3 -12   6   30.30    2.16 
  -3 -12   6   39.22    2.90 
  -3  12  -6   31.94    2.35 
   3 -12   6   34.97    2.41 
   3 -12   6   32.16    2.87 
  -3  12   6   31.94    2.52 
  -3 -12  -6   32.79    2.95 
  -3  12   6   35.12    2.82 
   3 -12  -7   39.00    2.66 
  -3 -12   7   38.60    2.42 
  -3 -12   7   46.60    3.18 
  -3  12  -7   40.50    3.03 
   3 -12   7   46.08    2.45 
  -3  12   7   44.17    2.88 
  -3 -12  -7   42.95    3.23 
  -3  12   7   42.46    3.58 
  -3 -12   8   67.59    3.42 
   3 -12  -8   61.47    3.65 
  -3 -12   8   58.10    3.18 
  -3 -12   8   64.81    4.07 
  -3  12  -8   64.38    3.91 
   3 -12   8   63.46    3.56 
  -3  12   8   63.86    3.47 
  -3 -12  -8   56.32    3.86 
  -3  12   8   61.16    4.17 
  -3 -12   9   11.74    1.68 
   3 -12  -9    9.22    1.84 
  -3 -12   9   10.06    2.13 
  -3 -12   9    9.37    1.66 
  -3  12  -9   12.16    2.05 
   3 -12   9   12.07    1.85 
  -3  12   9   10.00    2.09 
  -3 -12  -9   11.69    1.84 
  -3 -12  -9    8.21    2.13 
  -3 -12  10    1.34    1.43 
   3 -12 -10    1.23    1.76 
  -3  12 -10    3.56    2.48 
  -3 -12  10    0.23    2.03 
   3 -12  10    2.14    1.82 
  -3  12  10   -2.06    1.64 
  -3 -12 -10   -0.80    1.75 
  -3 -12 -10    0.09    2.39 
  -3 -12  11    8.95    1.39 
   3 -12 -11    7.86    2.06 
  -3  12 -11    5.82    2.20 
  -3 -12  11    7.91    1.81 
   3 -12  11    6.16    1.72 
  -3  12  11    9.53    2.25 
  -3 -12 -11    5.37    1.25 
  -3 -12 -11    2.47    1.74 
  -3 -12  12    2.92    1.39 
   3 -12 -12    2.34    2.17 
  -3  12 -12    1.62    2.54 
  -3 -12  12    6.56    2.04 
   3 -12  12    2.07    1.81 
  -3  12  12    1.67    1.89 
  -3 -12 -12   -1.04    1.67 
  -3 -12 -12    1.22    1.61 
  -3 -12  13    3.73    1.44 
   3 -12 -13    2.89    2.24 
  -3  12 -13    2.54    2.33 
  -3 -12  13    3.73    2.39 
   3 -12  13    2.14    1.54 
  -3  12  13    4.04    2.09 
  -3 -12 -13    2.69    1.54 
  -3 -12 -13    4.07    2.28 
  -3 -12  14   13.56    1.64 
  -3  12 -14   10.58    2.39 
  -3 -12  14   12.50    2.37 
   3 -12  14   14.66    1.96 
   3 -12  14   12.63    2.61 
  -3 -12 -14   14.48    1.64 
  -3 -12 -14   15.09    2.21 
   3 -12 -15   15.45    2.75 
  -3 -12 -15   12.36    3.06 
   3 -13   0   29.70    2.24 
   3 -13   0   30.51    2.58 
  -3 -13   0   27.22    2.06 
  -3  13   0   27.97    2.51 
  -3  13   0   34.03    2.96 
   3 -13  -1   23.90    2.19 
  -3  13  -1   25.28    2.36 
   3 -13  -1   23.06    2.64 
  -3  13  -1   23.05    3.13 
  -3 -13   1   22.02    2.47 
   3 -13   1   21.71    2.63 
  -3  13   1   24.28    2.37 
   3 -13   1   22.91    1.97 
  -3  13   1   20.62    2.91 
  -3 -13  -1   25.84    2.39 
   3 -13  -2  149.69    6.03 
  -3  13  -2  144.70    6.61 
  -3  13  -2  149.77    6.13 
  -3 -13   2  142.25    5.94 
  -3  13   2  133.05    5.90 
   3 -13   2  135.38    5.71 
  -3  13   2  147.94    6.65 
   3 -13   2  145.08    5.80 
   3 -13  -3    4.43    1.60 
  -3 -13   3    4.37    1.86 
  -3  13  -3   -0.67    1.75 
   3 -13   3    3.76    1.31 
   3 -13   3    0.49    1.98 
  -3  13   3    2.35    1.83 
  -3  13   3    2.25    2.35 
   3 -13  -4    5.23    1.61 
  -3 -13   4    4.38    1.59 
  -3  13  -4   10.20    1.95 
   3 -13   4    5.79    1.59 
   3 -13   4    7.18    2.16 
  -3  13   4    7.13    1.94 
  -3  13   4    5.08    2.58 
   3 -13  -5   36.23    2.63 
  -3 -13   5   40.76    2.72 
  -3  13  -5   42.66    2.96 
   3 -13   5   37.28    2.50 
   3 -13   5   35.61    2.91 
  -3  13   5   32.79    2.72 
  -3  13   5   41.31    3.69 
   3 -13  -6   43.60    2.54 
  -3 -13   6   48.87    3.21 
  -3  13  -6   42.30    2.74 
   3 -13   6   44.07    2.39 
   3 -13   6   37.68    2.81 
  -3  13   6   40.38    2.55 
  -3 -13  -6   39.68    3.07 
  -3  13   6   35.42    3.21 
   3 -13  -7   48.90    2.84 
  -3 -13   7   56.28    3.26 
  -3  13  -7   50.75    3.06 
   3 -13   7   45.56    2.82 
   3 -13   7   51.49    3.31 
  -3  13   7   48.74    2.86 
  -3 -13  -7   43.43    3.13 
  -3  13   7   46.33    3.56 
   3 -13  -8   10.24    1.77 
  -3 -13   8   11.56    2.21 
  -3  13  -8   11.53    2.33 
   3 -13   8   10.13    1.85 
  -3 -13  -8    8.93    1.88 
   3 -13   8    8.08    1.99 
  -3  13   8   12.42    1.77 
  -3 -13  -8    9.06    2.62 
   3 -13  -9    3.86    1.97 
  -3 -13   9    7.33    1.68 
  -3  13  -9    1.99    2.00 
   3 -13   9    3.98    1.58 
  -3 -13  -9    4.78    1.77 
   3 -13   9    2.81    2.30 
  -3  13   9    3.46    1.83 
  -3 -13  -9    0.54    2.26 
  -3 -13  10    0.27    1.58 
   3 -13 -10    1.15    2.10 
  -3 -13  10   -0.27    1.93 
  -3  13 -10    1.33    1.98 
   3 -13  10   -1.04    1.82 
  -3 -13 -10   -0.04    1.97 
   3 -13  10   -0.28    2.43 
  -3  13  10    0.42    1.96 
  -3 -13 -10    1.11    2.11 
  -3  13 -11   10.92    2.29 
  -3 -13  11   11.34    2.25 
   3 -13  11   12.43    1.92 
   3 -13  11   10.47    2.62 
  -3 -13 -11    9.75    1.50 
  -3 -13 -11   13.46    2.62 
  -3  13 -12    3.28    2.55 
  -3 -13  12    2.65    1.83 
   3 -13  12    7.61    1.80 
   3 -13  12    2.40    1.93 
  -3 -13 -12    3.77    1.38 
  -3 -13  13    7.97    2.24 
   3 -13  13   11.04    2.09 
  -3 -13 -13    7.77    1.48 
   3 -13  13    7.86    2.25 
  -3 -13 -13   10.96    2.45 
   3 -13 -14    7.83    2.99 
  -3 -13 -14    7.81    1.94 
   3 -14   0   10.65    1.67 
   3 -14   0    9.30    2.17 
  -3 -14   0    8.74    2.39 
  -3  14   0   13.35    2.16 
  -3  14   0    4.92    2.66 
   3 -14  -1   28.03    2.16 
  -3  14  -1   28.22    3.11 
  -3  14  -1   32.33    2.45 
  -3 -14   1   30.34    2.46 
  -3  14   1   26.34    2.33 
   3 -14   1   30.35    2.51 
  -3  14   1   30.47    3.12 
   3 -14   1   30.39    2.35 
   3 -14  -2   32.05    2.27 
  -3  14  -2   38.50    3.25 
  -3  14  -2   27.96    2.58 
  -3 -14   2   29.25    2.29 
  -3  14   2   32.58    2.53 
   3 -14   2   30.51    2.73 
  -3  14   2   29.73    2.87 
   3 -14   2   30.24    2.36 
   3 -14  -3    8.57    1.90 
  -3  14  -3    5.61    2.81 
  -3 -14   3    6.61    2.06 
  -3  14  -3    7.72    2.18 
   3 -14   3    8.50    4.26 
  -3  14   3    9.10    2.16 
  -3  14   3    5.62    2.88 
   3 -14   3   11.77    1.92 
   3 -14  -4   16.60    1.86 
  -3  14  -4   15.62    2.16 
  -3 -14   4   20.75    2.29 
  -3  14  -4   15.63    2.32 
   3 -14   4   15.83    2.45 
  -3  14   4   17.30    2.12 
  -3  14   4   11.89    3.11 
   3 -14   4   17.03    2.00 
   3 -14  -5   12.84    1.94 
  -3 -14   5   15.45    2.06 
  -3  14  -5   13.53    2.10 
   3 -14   5   11.32    1.87 
   3 -14   5   12.27    2.02 
  -3  14   5   11.84    2.07 
  -3  14   5   14.20    3.37 
   3 -14  -6   47.05    2.65 
  -3 -14   6   51.05    3.10 
  -3  14  -6   41.90    3.03 
   3 -14   6   45.65    2.45 
   3 -14   6   43.39    2.92 
  -3  14   6   39.94    2.55 
  -3  14  -7   21.23    2.29 
  -3 -14   7   18.90    2.34 
   3 -14   7   20.62    1.96 
   3 -14   7   23.11    2.39 
  -3 -14  -7   21.55    2.08 
  -3  14  -8    4.14    2.30 
  -3 -14   8    6.90    1.71 
   3 -14   8    3.58    1.79 
   3 -14   8    4.91    2.35 
  -3 -14  -8    2.03    1.80 
  -3 -14  -8    4.78    2.53 
  -3  14  -9   11.08    2.32 
  -3 -14   9    9.19    2.11 
   3 -14   9    9.96    2.16 
   3 -14   9   10.78    2.46 
  -3 -14  -9   10.72    1.87 
  -3 -14  -9    9.93    2.22 
  -3  14 -10    1.55    2.49 
  -3 -14  10   -1.33    1.62 
   3 -14  10    0.78    1.98 
   3 -14  10   -3.14    2.16 
  -3 -14 -10   -0.37    1.40 
  -3 -14 -10    0.20    2.41 
  -3 -14  11   10.49    2.36 
  -3 -14 -11    7.47    1.46 
   3 -14  11   10.31    2.40 
  -3 -14 -11    7.32    2.61 
  -3 -14  12    0.70    2.43 
   3 -14 -12    1.37    2.55 
  -3  15   0   24.46    3.19 
  -3 -15   1   14.52    1.94 
  -3  15  -1   13.76    2.57 
  -3  15   1   10.93    3.06 
  -3  15  -2   -2.63    2.42 
  -3  15   2    1.58    2.66 
  -3  15  -3  134.83    4.52 
  -3 -15   3  150.14    4.21 
  -3  15   3  134.88    4.46 
   3 -15   3  146.03    4.11 
  -3 -15   4    0.10    1.99 
  -3  15  -4    1.61    2.55 
   3 -15   4    0.78    2.23 
  -3  15  -5    7.76    2.51 
  -3 -15   5    8.31    2.06 
   3 -15   5    8.44    2.41 
  -3 -15  -5    8.29    1.86 
  -3  15  -6    7.27    2.69 
  -3 -15   6    3.91    1.90 
   3 -15   6    6.16    2.20 
  -3 -15  -6    5.76    1.40 
  -3  15  -7    7.86    2.79 
  -3 -15   7    7.70    1.91 
   3 -15   7    6.08    2.34 
  -3 -15  -7    8.99    1.81 
  -3  15  -8   13.02    3.16 
  -3 -15   8    6.93    1.73 
   3 -15   8    7.41    2.35 
  -3 -15  -8   11.59    1.57 
  -3 -15   9    8.91    2.00 
  -3  15  -9    7.19    3.04 
  -3 -15  -9    8.80    1.71 
  -3 -15  10   -2.36    2.35 
   3 -15 -10    0.82    2.68 
  -3 -15 -10    3.49    3.07 
  -3  16   0   20.34    3.40 
  -3  16  -1   15.13    3.23 
  -3  16   1   14.02    3.23 
  -3 -16   2   18.10    2.24 
  -3  16  -2   16.89    3.10 
  -3 -16   3   -1.24    1.67 
  -3  16  -3   -0.89    2.90 
  -3 -16   4    4.40    1.80 
  -3  16  -4    0.77    2.92 
  -3 -16  -4    6.04    1.96 
  -3 -16   5   12.01    2.08 
  -3  16  -5   13.52    2.86 
  -3 -16  -5   10.09    1.73 
  -3 -16   6    2.54    2.12 
  -3  16  -6    2.86    2.53 
  -3 -16  -6    2.37    1.81 
  -3 -16   7   16.34    2.25 
  -3  16  -7   16.43    3.67 
  -3 -16  -7   16.47    1.73 
  -3 -16   8    2.57    1.56 
  -3  16  -8    4.96    2.24 
  -3 -17   3    2.82    3.21 
  -3 -17  -3    7.74    2.10 
  -3 -17  -4    2.13    1.50 
   4   0   0   21.89    3.03 
  -4   0   0   22.36    2.95 
   4   0  -1  105.70    4.95 
   4   0   1   99.81    5.10 
  -4   0   1  107.79    5.39 
  -4   0  -1  108.03    5.94 
   4   0  -2    1.34    2.27 
   4   0   2    3.47    2.27 
  -4   0   2    4.00    3.06 
  -4   0  -2    3.05    3.17 
   4   0  -3   31.80    3.61 
  -4   0   3   34.21    3.08 
  -4   0  -3   30.14    3.93 
  -4   0  -4  341.30   13.23 
   4   0  -4  366.05    9.28 
  -4   0   4  352.33   14.02 
  -4   0  -4  327.84   14.01 
  -4   0  -5   31.51    3.61 
   4   0  -5   35.41    3.24 
  -4   0  -5   40.35    3.76 
  -4   0  -6   90.88    5.25 
   4   0  -6   78.33    4.66 
  -4   0  -6   88.31    5.24 
  -4   0  -7   34.28    3.43 
   4   0  -7   36.20    3.93 
  -4   0  -7   32.50    4.17 
  -4   0  -8    5.17    2.78 
   4   0  -8    1.55    2.06 
  -4   0  -8    3.88    3.40 
  -4   0  -9   -2.73    2.46 
   4   0  -9   -1.21    3.48 
  -4   0  -9   -0.58    3.65 
  -4   0 -10   28.74    3.77 
   4   0 -10   34.48    4.13 
  -4   0 -10   23.66    4.32 
  -4   0  10   26.76    1.56 
   4   0 -10   28.94    2.21 
  -4   0 -10   26.76    1.97 
  -4   0  10   25.38    1.72 
  -4   0  10   26.06    1.83 
  -4   0  10   27.70    2.42 
  -4   0 -11  103.53    5.96 
   4   0 -11  109.66    6.72 
  -4   0 -11  105.41    6.91 
  -4   0  11   87.67    3.48 
  -4   0 -11   99.22    4.24 
   4   0 -11   90.41    3.87 
  -4   0 -11  100.23    4.33 
  -4   0  11   88.15    3.49 
   4   0  11   85.73    3.54 
  -4   0  11   95.60    3.78 
  -4   0 -11   96.14    4.19 
  -4   0  11   83.85    4.48 
  -4   0  11   89.01    3.53 
  -4   0 -12  383.45   15.32 
   4   0 -12  369.86   15.36 
  -4   0 -12  400.68   16.15 
  -4   0  12  414.56   13.29 
  -4   0 -12  388.36   13.33 
   4   0 -12  398.98   13.36 
  -4   0 -12  394.36   13.24 
   4   0  12  409.73   13.70 
  -4   0  12  393.67   13.10 
  -4   0 -12  398.57   13.44 
  -4   0  12  411.26   14.17 
  -4   0  12  400.85   13.08 
  -4   0 -13   34.44    3.80 
   4   0 -13   41.32    5.00 
  -4   0  13   38.02    1.89 
  -4   0 -13   41.42    2.42 
   4   0 -13   45.91    2.94 
  -4   0 -13   39.53    2.83 
   4   0  13   42.70    2.42 
  -4   0  13   43.22    2.64 
  -4   0 -13   38.89    2.72 
  -4   0  13   37.95    2.80 
  -4   0  13   43.95    2.46 
  -4   0  14   48.89    2.40 
  -4   0 -14   52.41    3.06 
   4   0 -14   49.07    3.16 
  -4   0 -14   47.67    3.13 
   4   0  14   50.57    3.05 
  -4   0  14   48.97    2.53 
  -4   0  14   47.92    3.31 
  -4   0  14   52.16    2.69 
  -4   0  15    1.22    1.35 
   4   0 -15    1.11    1.55 
  -4   0 -15    4.69    2.10 
  -4   0  15   -0.91    1.53 
  -4   0  15   -0.72    1.17 
  -4   0  16    6.94    1.42 
   4   0 -16   -0.99    2.12 
   4   0  16    1.75    1.63 
  -4   0 -16    1.34    2.01 
   4   0 -16    1.01    2.17 
  -4   0  16    1.93    2.08 
  -4   0 -16    3.21    2.20 
  -4   0  16    5.45    1.67 
  -4   0  17    7.62    1.55 
   4   0 -17    4.09    2.13 
   4   0  17   10.05    1.73 
  -4   0 -17    7.34    2.05 
   4   0 -17    3.90    2.20 
  -4   0  17    1.88    1.71 
  -4   0 -17    4.11    2.18 
  -4   0  17    3.76    1.57 
  -4   0  18    0.80    1.29 
   4   0 -18    0.64    1.67 
   4   0  18    2.65    1.80 
  -4   0 -18    2.52    1.91 
   4   0 -18    4.43    2.06 
  -4   0  18    0.85    1.63 
  -4   0 -18   -1.18    2.45 
  -4   0  19    7.12    1.49 
   4   0 -19    8.01    1.95 
   4   0  19    8.30    2.07 
  -4   0 -19    5.90    2.18 
   4   0 -19    6.94    2.06 
  -4   0  19   10.20    1.98 
  -4   0 -19    8.11    2.57 
   4   0 -20    4.54    2.03 
  -4   0 -20    4.19    2.56 
   4   0 -20    3.55    2.56 
  -4   0  20    5.81    2.16 
   4   1   0   29.09    2.99 
   4   1   0   31.74    3.05 
   4  -1   0   27.14    3.44 
  -4  -1   0   32.83    4.04 
  -4   1   0   30.49    3.86 
   4   1   1  113.16    5.46 
   4  -1  -1  105.61    5.33 
   4   1   1  114.75    6.05 
  -4  -1   1  111.91    5.56 
  -4  -1   1  112.77    5.11 
  -4   1  -1  107.26    5.98 
   4   1  -1  113.00    5.52 
   4  -1   1  114.61    6.05 
  -4   1   1  117.00    5.81 
  -4  -1  -1  107.24    6.06 
   4   1   2  152.06    7.03 
   4  -1  -2  161.82    7.45 
   4   1   2  157.26    7.13 
  -4  -1   2  159.85    6.71 
  -4   1  -2  154.02    7.40 
   4   1  -2  165.96    7.38 
   4  -1   2  157.23    7.31 
  -4   1   2  164.76    7.36 
  -4  -1  -2  155.52    7.63 
  -4   1  -3 1343.78   29.18 
   4  -1  -3 1288.61   25.59 
  -4  -1   3 1344.71   27.70 
  -4  -1  -3 1321.90   26.87 
   4  -1   3 1314.25   27.54 
  -4   1   3 1261.34   27.18 
  -4  -1  -3 1391.73   30.02 
   4   1  -3 1314.99   26.96 
  -4   1  -4 1355.68   27.43 
   4  -1  -4 1440.21   28.97 
  -4  -1  -4 1290.92   26.61 
   4   1  -4 1399.64   28.67 
  -4  -1  -4 1391.66   29.46 
  -4   1  -5  440.84   17.25 
  -4   1  -5  431.00   16.93 
   4  -1  -5  393.15   15.65 
  -4  -1  -5  452.36   17.47 
  -4  -1  -5  446.76   17.56 
   4   1  -5  422.06   16.43 
  -4   1  -6  548.93   20.28 
  -4   1  -6  544.79   21.15 
   4  -1  -6  574.23   21.07 
  -4  -1  -6  559.53   20.68 
  -4  -1  -6  566.67   21.54 
   4   1  -6  575.92   20.74 
  -4   1  -7  423.48   16.48 
  -4   1  -7  420.60   16.91 
   4  -1  -7  399.54   15.68 
  -4  -1  -7  441.16   16.75 
  -4  -1  -7  406.72   16.21 
   4   1  -7  429.72   16.36 
  -4   1  -8  297.97   13.04 
  -4   1  -8  281.36   13.16 
   4  -1  -8  288.13   12.59 
   4   1  -8  302.80   13.35 
  -4  -1  -8  283.96   12.52 
  -4  -1  -8  254.89   11.84 
  -4   1  -9    6.54    2.39 
  -4   1  -9    9.99    3.84 
   4  -1  -9    4.63    2.74 
  -4  -1  -9    4.42    3.16 
  -4  -1  -9    3.02    3.17 
   4   1  -9    3.54    3.19 
  -4   1 -10   86.82    6.37 
   4  -1 -10   81.63    5.02 
  -4  -1  10   76.06    4.40 
   4  -1 -10   71.61    5.91 
  -4   1 -10   71.62    6.36 
  -4  -1  10   83.84    4.75 
  -4   1 -10   86.94    5.10 
  -4  -1  10   76.32    4.56 
  -4  -1  10   77.98    4.68 
  -4   1 -10   77.94    4.76 
  -4  -1 -10   83.67    6.44 
  -4   1  10   78.79    4.57 
  -4  -1 -10   87.04    7.42 
  -4  -1 -10   86.63    5.45 
   4   1 -10   91.95    6.62 
  -4   1  10   77.94    4.46 
   4  -1  10   80.22    4.74 
  -4  -1 -10   81.33    4.72 
  -4   1  10   80.56    4.81 
  -4  -1 -10   83.08    4.98 
  -4   1  10   81.82    5.15 
   4   1 -10   80.92    4.79 
  -4   1  10   77.99    4.58 
  -4   1 -11   46.55    5.12 
  -4   1 -11   51.46    2.98 
  -4   1 -11   44.00    2.78 
   4  -1 -11   51.89    4.69 
   4  -1 -11   55.52    2.88 
  -4   1 -11   42.93    5.31 
  -4  -1  11   49.29    2.33 
  -4  -1  11   45.71    3.09 
  -4   1 -11   45.14    2.74 
  -4  -1  11   46.32    2.48 
  -4  -1  11   47.79    2.35 
   4   1  11   45.78    2.55 
  -4   1  11   50.22    2.46 
   4   1 -11   41.98    2.62 
  -4  -1 -11   47.86    4.26 
  -4   1  11   46.89    2.26 
  -4  -1 -11   51.00    5.09 
   4   1 -11   49.63    4.78 
  -4  -1 -11   47.97    2.55 
  -4   1  11   51.74    2.56 
  -4  -1 -11   51.74    2.76 
  -4  -1 -11   43.76    2.74 
   4  -1  11   51.54    2.96 
  -4   1  11   47.74    2.93 
  -4   1  11   46.78    2.30 
  -4   1 -12   24.55    4.20 
  -4   1 -12   20.79    2.17 
   4   1  12   20.35    2.05 
   4  -1 -12   19.16    3.04 
  -4   1 -12   22.00    4.72 
  -4  -1  12   20.56    1.59 
  -4  -1  12   28.51    2.46 
   4  -1 -12   21.52    1.65 
  -4   1 -12   24.30    2.25 
  -4  -1  12   26.01    2.14 
  -4  -1 -12   23.02    3.81 
  -4  -1 -12   23.09    2.30 
  -4  -1 -12   24.96    1.91 
   4  -1  12   26.17    2.10 
   4   1 -12   25.02    3.28 
   4   1 -12   24.99    1.88 
  -4   1  12   23.88    1.82 
  -4  -1 -12   23.12    2.24 
  -4   1  12   24.02    1.48 
  -4   1  12   22.05    2.18 
  -4   1  12   25.01    1.70 
  -4   1 -13   -0.40    2.48 
  -4   1 -13    3.87    1.50 
   4   1  13    1.46    1.57 
   4  -1 -13    4.05    3.53 
  -4   1 -13    4.40    4.12 
  -4  -1  13    3.15    1.47 
  -4  -1  13    3.08    1.90 
   4  -1 -13   -0.67    1.87 
  -4   1 -13    0.42    2.18 
  -4  -1  13    1.71    1.21 
  -4  -1 -13   -0.24    3.81 
  -4  -1 -13    2.51    2.00 
  -4  -1 -13    1.00    2.07 
   4  -1  13    2.39    1.43 
   4   1 -13    1.85    3.72 
   4   1 -13    3.37    1.86 
  -4   1  13   -0.12    1.75 
  -4  -1 -13    1.47    1.91 
  -4   1  13    1.75    1.17 
  -4   1  13    6.46    2.04 
  -4   1  13    2.35    1.48 
  -4  -1  14    5.53    1.38 
   4   1  14    6.36    1.84 
  -4  -1  14    8.48    1.66 
   4  -1 -14    7.99    2.03 
  -4   1 -14    0.44    2.06 
   4   1 -14    7.54    2.29 
  -4  -1 -14    3.31    2.14 
  -4   1  14    6.42    1.37 
  -4  -1 -14    5.92    1.84 
  -4   1  14    2.20    1.55 
  -4  -1 -14    6.04    2.30 
  -4   1  14    6.51    1.92 
  -4   1  14    6.97    1.72 
  -4  -1  15   10.45    1.47 
   4  -1 -15   13.53    1.85 
  -4  -1  15   11.86    1.62 
  -4  -1  15    9.69    1.75 
  -4   1 -15   15.48    2.40 
   4   1  15   13.22    2.08 
  -4   1 -15   16.46    2.47 
  -4  -1 -15   10.50    2.16 
   4  -1  15    9.73    1.36 
  -4   1  15   10.97    1.68 
   4   1 -15   14.23    2.06 
  -4  -1 -15   12.31    2.14 
  -4   1  15   14.19    1.82 
  -4  -1 -15    9.82    1.92 
  -4   1  15   16.34    2.07 
   4   1 -15   10.16    2.13 
  -4   1  15   10.51    1.84 
  -4  -1  16    3.72    1.07 
  -4  -1  16    2.97    1.91 
  -4  -1  16    5.77    1.66 
   4  -1 -16    5.88    2.23 
   4   1  16    6.60    1.68 
  -4   1 -16    0.24    2.19 
   4  -1 -16    0.06    1.55 
  -4   1 -16    8.56    2.39 
  -4   1  16    0.11    1.31 
  -4  -1 -16    4.33    1.76 
   4   1 -16    3.58    2.05 
   4  -1  16    1.54    1.49 
  -4   1  16    2.77    1.62 
  -4  -1 -16    0.35    2.25 
   4   1 -16    2.49    2.28 
  -4   1  16    0.96    1.60 
  -4  -1  17    2.58    1.19 
  -4  -1  17    1.80    1.72 
  -4  -1  17    0.17    1.96 
   4  -1 -17    0.40    2.04 
   4   1  17   -0.93    1.71 
  -4   1 -17    5.70    2.19 
   4  -1 -17   -0.29    2.04 
  -4   1 -17    6.08    2.29 
  -4   1  17    4.85    1.36 
  -4  -1 -17    4.59    1.74 
   4   1 -17    4.43    1.98 
   4  -1  17    1.87    1.35 
  -4   1  17    1.49    1.80 
  -4  -1 -17    1.79    2.27 
   4   1 -17    3.21    1.57 
  -4   1  17    3.03    1.48 
  -4  -1  18    7.13    1.46 
  -4  -1  18    7.69    2.15 
   4   1  18    7.28    1.74 
   4  -1 -18    6.66    2.79 
  -4   1 -18    5.66    2.31 
   4  -1 -18    6.59    1.92 
  -4   1 -18    1.98    2.05 
  -4   1  18    4.59    1.64 
   4   1 -18    2.94    1.94 
  -4  -1 -18    5.80    2.02 
   4   1 -18    6.92    2.17 
   4  -1  18    5.55    1.56 
  -4   1  18    4.14    1.86 
  -4  -1 -18    5.91    2.65 
  -4  -1  19    9.06    1.49 
  -4  -1  19    7.55    1.81 
   4   1  19    8.82    1.96 
   4  -1 -19    7.63    2.21 
  -4   1 -19    7.36    2.46 
   4  -1 -19    5.91    2.28 
  -4   1 -19    7.95    2.51 
  -4   1  19    7.84    1.63 
   4   1 -19   11.65    2.14 
  -4  -1 -19    8.31    2.26 
   4   1 -19    5.95    2.71 
   4  -1  19    9.64    1.75 
  -4   1  19    7.21    1.89 
  -4  -1 -19   10.45    2.62 
  -4  -1  20   19.70    1.96 
   4  -1 -20   22.10    2.45 
  -4   1 -20   20.67    2.78 
  -4  -1  20   22.60    2.13 
  -4   1 -20   23.71    3.05 
   4  -1 -20   21.72    2.44 
  -4  -1 -20   19.52    2.43 
  -4   1  20   18.25    1.97 
   4  -1  20   24.07    2.79 
   4   1 -20   14.23    3.08 
   4  -2   0   58.82    4.24 
  -4  -2   0   57.50    4.39 
  -4   2   0   60.45    5.14 
  -4   2  -1  294.51   12.15 
  -4  -2   1  272.53   11.76 
   4  -2  -1  284.01   11.30 
   4  -2   1  299.17   12.71 
   4   2  -1  275.85   12.00 
  -4  -2  -1  277.88   11.66 
   4   2  -1  283.52   12.01 
  -4  -2   2  578.70   20.70 
   4   2   2  572.52   21.61 
   4  -2  -2  597.76   21.71 
   4   2   2  572.50   22.44 
  -4  -2   2  527.52   20.15 
  -4   2  -2  568.19   22.28 
   4   2  -2  570.86   21.85 
  -4  -2  -2  541.28   20.59 
   4  -2   2  571.85   21.63 
   4  -2  -3  355.87   14.22 
  -4   2  -3  365.29    9.80 
   4   2  -3  356.96   14.39 
   4  -2   3  367.63   10.17 
  -4  -2  -3  358.82   14.53 
  -4   2  -4  223.08    9.31 
  -4   2  -4  222.87   10.35 
   4  -2  -4  208.30    7.66 
  -4  -2  -4  224.85    9.81 
  -4  -2  -4  224.71   10.48 
   4   2  -4  226.46   10.15 
  -4   2  -5   60.55    3.90 
   4  -2  -5   52.85    4.21 
  -4   2  -5   64.67    4.65 
  -4  -2  -5   62.58    4.28 
   4   2  -5   59.36    4.19 
  -4   2   5   59.21    4.40 
  -4  -2  -5   58.95    4.55 
  -4   2  -6  130.05    6.37 
  -4   2  -6  116.26    6.36 
   4  -2  -6  120.51    5.83 
  -4  -2  -6  119.52    5.54 
  -4  -2  -6  107.79    5.85 
   4   2  -6  113.16    5.51 
  -4   2  -7  328.23   13.07 
  -4   2  -7  360.11   15.01 
   4  -2  -7  336.68   12.69 
  -4  -2  -7  348.21   13.85 
  -4  -2  -7  343.29   13.76 
   4   2  -7  319.81   12.79 
  -4   2  -8   41.72    3.43 
  -4   2  -8   44.78    4.25 
   4  -2  -8   47.06    4.26 
  -4  -2  -8   44.11    4.55 
  -4  -2  -8   54.10    5.04 
   4   2  -8   48.32    4.58 
  -4   2  -9   26.62    3.41 
  -4   2  -9   21.88    4.06 
   4  -2  -9   19.39    3.85 
  -4  -2  -9   24.77    3.43 
  -4  -2  -9   20.69    3.44 
   4   2  -9   27.54    3.96 
  -4   2 -10   71.50    5.32 
  -4   2 -10   75.14    5.74 
  -4  -2  10   72.85    3.53 
   4  -2 -10   68.76    5.16 
  -4   2 -10   73.17    3.77 
  -4   2 -10   70.98    3.49 
   4  -2 -10   75.22    3.68 
  -4  -2  10   75.35    3.28 
  -4  -2  10   71.98    3.33 
  -4  -2 -10   80.37    5.65 
   4   2 -10   73.52    3.63 
  -4  -2 -10   80.63    3.67 
  -4   2  10   78.38    3.55 
   4  -2  10   78.10    3.76 
   4   2 -10   68.01    4.97 
  -4   2  10   80.00    3.59 
  -4  -2 -10   74.48    4.42 
  -4   2  10   81.30    3.92 
  -4   2  10   79.66    3.51 
  -4   2  10   71.88    3.39 
  -4   2 -11  321.25   12.79 
  -4  -2  11  316.03   10.16 
  -4  -2  11  318.48    9.79 
  -4   2 -11  291.49   12.34 
   4  -2 -11  289.58    9.40 
  -4  -2  11  313.38    9.57 
  -4   2 -11  295.62    9.63 
  -4  -2 -11  306.21   12.86 
  -4  -2 -11  285.35    9.25 
  -4   2  11  313.54    9.62 
   4   2 -11  331.09   10.54 
  -4   2  11  297.66    9.56 
  -4  -2 -11  305.98   10.36 
  -4   2  11  298.02    9.99 
   4   2 -11  305.59   12.61 
  -4   2  11  300.84    9.38 
  -4   2 -12   18.45    3.20 
  -4  -2  12   13.76    1.86 
   4  -2 -12   12.38    2.86 
  -4   2 -12   15.79    4.38 
  -4  -2  12   19.61    1.47 
  -4  -2  12   15.32    2.11 
  -4  -2  12   17.17    1.69 
   4  -2 -12   12.66    1.46 
  -4   2 -12   19.76    2.36 
  -4   2 -12   19.34    2.01 
  -4  -2  12   16.88    1.86 
   4  -2  12   17.76    1.40 
   4   2 -12   13.50    2.05 
  -4  -2 -12   18.94    1.64 
  -4   2  12   13.05    1.70 
  -4   2  12   17.06    1.55 
  -4  -2 -12   17.74    2.41 
  -4   2  12   18.78    1.49 
  -4   2  12   23.04    2.28 
   4   2 -12   14.96    3.18 
  -4   2  12   16.76    1.47 
  -4   2 -13  164.45    8.47 
   4  -2 -13  170.12    6.14 
   4  -2 -13  162.37    8.94 
  -4   2 -13  172.21    9.20 
  -4  -2  13  192.93    6.26 
  -4  -2  13  187.15    6.37 
  -4  -2  13  177.48    6.30 
  -4   2 -13  177.84    6.48 
  -4   2 -13  168.04    6.56 
  -4  -2  13  174.95    6.03 
   4   2  13  172.11    6.17 
   4   2 -13  170.58   10.65 
   4   2 -13  183.89    6.80 
  -4   2  13  182.81    6.26 
   4  -2  13  181.34    6.22 
  -4  -2 -13  169.20    6.43 
  -4   2  13  171.22    6.27 
  -4   2  13  175.26    5.80 
  -4   2  13  169.35    5.65 
  -4  -2  14   41.70    2.32 
   4   2  14   47.46    3.08 
  -4  -2  14   50.46    2.72 
  -4   2 -14   51.25    3.36 
   4  -2 -14   50.72    3.14 
  -4   2 -14   51.96    3.11 
   4  -2  14   48.23    2.73 
   4   2 -14   43.91    3.02 
  -4  -2 -14   49.28    3.16 
  -4   2  14   46.55    2.73 
  -4   2  14   54.19    2.67 
  -4  -2 -14   46.16    3.17 
  -4   2  14   49.46    2.95 
  -4   2  14   46.12    2.57 
  -4  -2  15   43.11    2.35 
   4  -2 -15   36.45    2.62 
   4   2  15   46.01    3.06 
  -4  -2  15   39.63    2.59 
  -4   2 -15   41.40    3.07 
  -4   2 -15   37.86    2.86 
  -4  -2 -15   39.89    3.06 
   4  -2  15   41.25    2.27 
  -4   2  15   38.45    2.24 
   4   2 -15   41.77    3.04 
  -4  -2 -15   41.93    2.98 
  -4   2  15   42.17    2.44 
   4   2 -15   31.78    2.71 
  -4  -2 -15   40.43    2.78 
  -4   2  15   39.28    2.54 
  -4   2  15   40.33    2.44 
  -4  -2  16    3.55    1.42 
   4  -2 -16    2.60    1.56 
   4  -2 -16    4.46    2.19 
  -4   2 -16    2.03    2.13 
  -4  -2  16    5.81    1.76 
  -4   2 -16    2.68    2.33 
  -4   2  16    5.07    1.38 
   4  -2  16    6.53    1.83 
   4   2 -16    5.25    2.30 
  -4  -2 -16    3.22    2.17 
  -4   2  16    4.77    1.97 
   4   2 -16    2.94    2.30 
  -4  -2 -16    3.59    2.08 
  -4   2  16    3.81    1.60 
  -4  -2  17    1.17    1.10 
  -4  -2  17    0.55    1.31 
   4   2  17    5.26    1.81 
   4  -2 -17    1.30    2.20 
  -4   2 -17    0.27    2.27 
   4  -2 -17    0.18    1.89 
  -4   2 -17    3.63    2.16 
  -4   2  17    1.90    1.24 
   4   2 -17    1.01    2.03 
  -4  -2 -17    1.92    2.43 
   4   2 -17    1.36    2.04 
   4  -2  17    3.79    1.68 
  -4   2  17    3.23    1.88 
  -4  -2 -17    3.09    2.40 
  -4   2  17   -2.43    1.80 
  -4  -2  18   11.99    1.55 
   4  -2 -18    9.53    2.26 
   4  -2 -18   14.38    2.63 
  -4   2 -18   11.90    2.49 
  -4  -2  18   11.89    1.94 
  -4   2 -18    6.02    2.32 
  -4   2  18   11.42    1.59 
   4  -2  18   10.69    1.76 
   4   2 -18    9.71    2.51 
  -4  -2 -18   11.50    2.34 
  -4   2  18   12.55    1.68 
   4   2 -18   13.81    2.44 
  -4  -2  19    3.92    1.27 
  -4  -2  19    5.79    1.89 
   4  -2 -19    2.82    2.13 
  -4   2 -19   -1.68    2.25 
  -4   2 -19    3.48    2.79 
   4  -2 -19    5.57    2.24 
  -4  -2 -19    4.90    2.08 
   4   2 -19    6.30    2.20 
  -4   2  19    2.83    1.82 
   4  -2  19    4.31    1.69 
  -4  -2  20    3.78    1.44 
   4  -2 -20    5.42    2.49 
   4  -2 -20    6.83    2.38 
  -4  -2  20    5.93    2.15 
  -4   2 -20    3.44    2.21 
   4  -2  20    4.02    1.88 
  -4   2  20    4.18    2.02 
  -4  -2 -20    3.91    2.00 
   4   2 -20    2.19    3.05 
   4  -3   0 1131.34   23.36 
  -4  -3   0 1094.93   23.64 
   4  -3  -1 1036.97   22.16 
   4  -3   1 1105.31   23.70 
  -4  -3  -1  994.13   21.84 
   4  -3  -2  309.80   12.86 
   4   3  -2  313.71   13.84 
   4  -3   2  310.70   12.50 
  -4  -3  -2  302.42   12.13 
  -4   3   2  334.65   13.11 
   4  -3  -3  223.91    9.38 
  -4   3  -3  214.57    9.17 
   4   3  -3  239.34   10.80 
  -4   3   3  221.79    9.97 
  -4  -3  -3  226.20   10.45 
   4  -3   3  234.25    9.82 
  -4   3  -4  214.70    9.00 
   4  -3  -4  225.77    9.98 
   4   3  -4  198.18    7.86 
   4  -3   4  202.37    8.25 
  -4   3   4  190.57    7.85 
  -4  -3  -4  215.24    8.17 
  -4  -3  -4  206.38    8.47 
  -4   3  -5  257.46   10.84 
   4  -3  -5  257.89   10.41 
  -4   3  -5  253.77   11.64 
  -4  -3  -5  251.34   10.53 
   4   3  -5  254.87   10.99 
  -4   3   5  271.10   11.56 
  -4  -3  -5  238.08   11.11 
  -4   3  -6  295.22   11.45 
   4  -3  -6  285.66   11.56 
  -4   3  -6  294.43   12.52 
  -4  -3  -6  293.56   11.99 
   4   3  -6  284.62   11.65 
  -4   3   6  290.63   11.57 
  -4  -3  -6  284.07   12.19 
  -4   3  -7  200.37    9.67 
  -4   3  -7  197.40   10.22 
   4  -3  -7  192.26    9.34 
   4   3  -7  177.00    9.26 
  -4  -3  -7  181.09    8.91 
  -4   3  -8   35.48    3.66 
  -4   3  -8   33.42    4.35 
   4  -3  -8   35.47    3.80 
   4   3  -8   28.40    3.21 
  -4  -3  -8   31.34    3.88 
  -4   3  -9  118.90    6.93 
  -4   3  -9  134.27    8.14 
  -4  -3   9  122.24    5.21 
   4  -3  -9  126.75    7.12 
  -4  -3   9  112.79    6.31 
  -4  -3   9  107.27    5.88 
   4  -3  -9  126.05    5.23 
  -4   3  -9  113.78    6.70 
  -4  -3  -9  115.29    6.61 
  -4  -3  -9  113.87    6.41 
   4  -3   9  110.01    6.24 
  -4   3   9  114.47    6.30 
  -4  -3  -9  121.31    5.40 
  -4  -3  -9  113.22    6.62 
   4   3  -9  120.58    7.06 
  -4   3   9  115.52    4.62 
  -4   3   9  108.37    5.85 
  -4   3   9  106.82    6.15 
  -4   3 -10    7.92    2.41 
  -4   3 -10    5.97    1.53 
   4  -3 -10    6.48    2.51 
  -4   3 -10    7.64    4.09 
  -4  -3  10    7.91    1.20 
  -4  -3  10    7.90    1.34 
   4  -3 -10    8.12    1.25 
  -4   3 -10    6.40    2.17 
  -4  -3  10    6.43    1.32 
  -4  -3  10    7.97    2.16 
   4  -3  10    3.96    1.01 
  -4  -3 -10    6.59    1.88 
  -4   3  10    5.34    1.58 
   4   3 -10   10.74    2.63 
  -4  -3 -10    6.36    1.97 
  -4  -3 -10    7.92    1.50 
  -4   3  10   10.42    1.71 
  -4   3  10    3.64    1.30 
  -4   3  10    4.30    1.12 
  -4   3 -11   12.48    4.00 
  -4   3 -11   11.43    2.26 
   4  -3 -11   10.71    2.67 
  -4   3 -11    8.47    3.79 
  -4  -3  11   11.08    1.59 
   4  -3 -11   14.39    1.37 
  -4  -3  11   10.80    1.65 
  -4  -3  11   11.38    1.67 
  -4   3 -11   13.00    2.39 
   4   3 -11   12.10    3.75 
   4  -3  11    9.07    1.57 
  -4   3  11   13.93    1.21 
  -4  -3 -11   12.98    1.64 
  -4   3  11   13.39    1.45 
  -4  -3 -11    7.02    1.94 
  -4  -3 -11   13.22    1.82 
  -4   3  11   11.48    1.65 
   4   3 -11   11.66    2.17 
  -4   3  11   12.67    1.86 
  -4   3 -12   74.47    5.23 
  -4   3 -12   59.51    3.44 
   4  -3 -12   62.24    5.11 
  -4   3 -12   67.53    6.04 
  -4  -3  12   67.43    2.85 
   4  -3 -12   62.24    2.97 
  -4  -3  12   64.11    2.59 
  -4  -3  12   71.08    3.20 
  -4   3 -12   66.17    3.61 
   4   3 -12   67.83    6.15 
   4  -3  12   59.40    2.77 
  -4   3  12   72.00    2.92 
  -4  -3 -12   68.46    2.82 
  -4   3  12   67.36    2.83 
  -4  -3 -12   75.30    3.55 
  -4  -3 -12   67.23    3.51 
  -4   3  12   66.17    3.31 
   4   3 -12   65.32    3.48 
  -4   3  12   67.78    2.72 
  -4   3 -13   34.26    4.29 
  -4  -3  13   27.67    1.77 
   4  -3 -13   34.70    4.54 
  -4   3 -13   32.23    4.92 
  -4  -3  13   27.92    1.58 
  -4   3 -13   32.71    2.69 
  -4  -3  13   35.60    2.16 
   4  -3 -13   33.20    2.48 
  -4  -3  13   36.04    2.16 
  -4   3 -13   32.54    2.50 
   4  -3  13   32.19    2.13 
  -4  -3 -13   29.11    2.12 
  -4   3  13   33.36    2.17 
   4   3 -13   32.81    4.69 
  -4   3  13   33.60    2.25 
  -4  -3 -13   29.63    2.44 
  -4  -3 -13   33.43    2.64 
  -4   3  13   29.31    1.98 
   4   3 -13   29.37    2.58 
  -4   3  13   33.81    2.21 
  -4  -3  14   50.75    2.56 
  -4  -3  14   50.13    3.01 
   4  -3 -14   50.43    3.04 
  -4  -3  14   53.06    2.66 
  -4   3 -14   46.98    3.19 
  -4   3 -14   53.26    3.51 
  -4  -3  14   52.00    2.94 
  -4   3  14   51.74    2.69 
   4  -3  14   57.37    3.09 
  -4  -3 -14   48.21    2.96 
  -4   3  14   58.00    3.17 
   4   3 -14   54.35    3.19 
  -4  -3 -14   54.01    3.07 
  -4   3  14   51.84    3.46 
   4   3 -14   54.54    3.43 
  -4   3  14   55.48    2.92 
  -4  -3  15    3.59    1.34 
  -4  -3  15    7.42    1.89 
  -4   3 -15    3.44    2.25 
   4  -3 -15    3.73    1.49 
  -4  -3  15    4.82    1.70 
  -4   3 -15    4.11    2.60 
   4  -3  15    3.75    1.71 
   4   3 -15    4.24    2.13 
  -4   3  15    4.69    0.96 
  -4   3  15    4.67    1.83 
  -4  -3 -15    6.53    1.82 
  -4   3  15    5.61    2.28 
   4   3 -15    5.56    2.39 
  -4   3  15    6.62    1.29 
  -4  -3  16    3.35    1.40 
  -4   3 -16    1.90    2.15 
   4  -3 -16    0.45    1.70 
  -4   3 -16    0.58    2.56 
  -4  -3  16    0.24    1.86 
  -4  -3  16   -1.40    1.88 
  -4   3  16    2.22    1.32 
   4  -3  16    2.25    1.67 
  -4   3  16    1.04    1.71 
  -4  -3 -16   -0.13    2.02 
  -4   3  16    0.53    2.35 
   4   3 -16   -0.73    1.91 
  -4   3  16   -0.34    1.53 
  -4  -3  17    1.82    1.39 
  -4  -3  17    3.98    1.86 
  -4   3 -17    2.92    2.34 
   4  -3 -17   -1.63    2.18 
   4  -3 -17    2.91    2.12 
  -4   3 -17    3.55    2.31 
   4  -3  17    3.87    1.79 
   4   3 -17    2.09    2.07 
  -4   3  17    3.27    1.67 
  -4   3  17   -0.58    1.81 
  -4  -3 -17   -2.88    2.00 
  -4   3  17    0.21    1.70 
  -4  -3  18   -0.26    1.44 
  -4   3 -18    1.02    2.49 
   4  -3 -18    2.27    1.92 
   4  -3 -18   -0.39    2.08 
  -4  -3  18    3.26    1.89 
   4  -3  18    0.79    2.00 
  -4   3  18    0.63    1.33 
   4   3 -18    3.11    2.20 
  -4  -3  19   15.57    1.41 
   4  -3 -19   18.62    2.20 
  -4  -3  19   19.02    2.07 
   4  -3 -19   16.29    2.13 
  -4   3 -19   13.76    2.40 
   4  -3  19   16.64    1.89 
  -4   3  19   15.71    1.97 
   4   3 -19   11.86    2.69 
  -4  -3  20    5.39    1.43 
   4  -3 -20    5.83    1.88 
  -4   3 -20    5.26    2.34 
   4  -3 -20    6.30    2.41 
   4  -3  20    6.49    1.98 
  -4   3  20    5.20    1.97 
  -4  -3 -20    8.70    2.09 
   4   3 -20    5.52    2.52 
   4  -4   0  164.12    7.72 
  -4   4   0  183.88    7.80 
   4  -4  -1  913.46   20.60 
  -4   4  -1  945.30   22.08 
   4  -4   1  971.48   21.41 
  -4   4   1  934.62   21.30 
   4  -4  -2 3153.04   54.47 
  -4   4   2 3087.18   53.92 
   4  -4  -3  158.59    6.87 
   4   4  -3  158.86    7.14 
   4  -4   3  158.09    7.55 
  -4   4   3  144.97    6.31 
   4  -4  -4   36.40    3.24 
   4   4  -4   39.75    3.65 
   4  -4   4   51.24    4.47 
  -4   4   4   32.37    3.89 
   4  -4  -5   20.73    2.82 
   4   4  -5   15.62    3.23 
   4  -4   5   16.16    3.04 
  -4   4   5   20.58    3.36 
  -4   4  -6   32.45    3.86 
  -4   4  -6   34.73    4.31 
   4  -4  -6   35.23    3.79 
  -4   4   6   36.11    3.54 
   4   4  -6   28.59    3.85 
  -4   4  -7   65.42    5.12 
   4  -4  -7   61.11    5.35 
  -4   4  -7   75.68    6.14 
   4   4  -7   60.91    5.54 
  -4   4  -8    4.17    2.39 
   4  -4  -8    5.82    3.44 
  -4   4  -8    4.55    3.82 
   4   4  -8    4.53    2.91 
  -4   4  -9   93.21    5.73 
  -4   4  -9   77.52    3.89 
   4  -4  -9   89.20    5.77 
  -4   4  -9   86.98    6.31 
  -4  -4   9   87.22    3.83 
  -4  -4   9   81.58    3.64 
   4  -4  -9   82.78    3.67 
  -4  -4   9   89.53    3.92 
   4  -4   9   80.94    3.61 
  -4  -4  -9   77.26    3.47 
  -4  -4  -9   80.94    3.96 
  -4   4   9   81.37    3.49 
  -4   4   9   82.26    3.67 
   4   4  -9   88.70    6.46 
  -4  -4  -9   80.38    4.01 
  -4   4   9   89.80    4.71 
   4  -4   9   73.81    3.18 
  -4   4   9   74.56    3.82 
  -4   4 -10  102.38    6.51 
   4  -4 -10   98.94    3.97 
   4  -4 -10  105.63    5.80 
  -4   4 -10   87.80    6.51 
  -4  -4  10  102.69    3.82 
  -4  -4  10   99.73    3.83 
  -4   4 -10  104.76    4.84 
  -4  -4  10  100.23    3.89 
   4  -4  10   97.02    3.52 
   4   4 -10  100.05    6.41 
  -4   4  10   98.11    3.83 
  -4  -4 -10  104.46    3.97 
  -4   4  10  102.70    3.76 
  -4   4  10  106.27    4.27 
   4  -4  10   99.69    3.86 
  -4  -4 -10  102.67    4.21 
  -4   4  10  106.19    4.45 
  -4  -4 -10  107.38    4.44 
  -4   4  10  101.68    3.97 
  -4   4 -11  138.71    8.06 
   4  -4 -11  130.80    5.12 
   4  -4 -11  143.85    7.90 
  -4   4 -11  136.63    7.92 
  -4  -4  11  145.08    5.24 
  -4  -4  11  137.57    5.03 
  -4   4 -11  138.20    5.77 
  -4  -4  11  148.24    5.44 
   4  -4  11  139.35    5.07 
   4   4 -11  131.50    8.75 
  -4   4  11  139.64    5.16 
  -4  -4 -11  141.88    5.20 
  -4   4  11  140.48    5.19 
  -4   4  11  136.49    5.30 
   4  -4  11  133.25    5.11 
  -4  -4 -11  148.73    5.90 
  -4   4  11  147.40    5.78 
  -4  -4 -11  146.03    5.60 
  -4   4  11  139.08    5.12 
  -4   4 -12   44.28    4.62 
   4  -4 -12   48.51    4.21 
  -4   4 -12   56.02    5.66 
  -4   4 -12   47.89    2.63 
  -4  -4  12   52.88    2.19 
  -4  -4  12   55.40    2.59 
   4  -4 -12   49.06    2.30 
  -4  -4  12   55.62    2.47 
  -4  -4  12   52.30    2.83 
  -4   4  12   52.68    2.44 
   4  -4  12   52.96    2.42 
  -4  -4 -12   56.22    3.08 
  -4   4  12   55.86    2.48 
  -4  -4 -12   57.90    2.65 
  -4   4  12   56.36    2.85 
   4  -4  12   55.65    2.42 
  -4  -4 -12   53.29    3.11 
  -4   4  12   59.62    3.23 
   4   4 -12   52.41    3.17 
  -4   4  12   51.76    2.69 
  -4  -4  13   34.15    1.76 
  -4  -4  13   35.97    2.27 
  -4   4 -13   36.90    3.42 
  -4  -4  13   40.98    2.11 
   4   4 -13   34.94    2.96 
  -4  -4 -13   36.43    2.21 
  -4  -4 -13   34.05    2.46 
  -4   4  13   33.48    1.58 
  -4   4  13   38.11    2.52 
   4  -4  13   37.83    2.37 
  -4  -4 -13   39.11    2.81 
  -4   4  13   35.23    2.84 
   4  -4  13   38.00    2.16 
  -4   4  13   33.58    1.72 
  -4  -4  14   41.35    2.77 
  -4   4 -14   40.81    3.08 
  -4  -4  14   44.28    2.42 
  -4  -4  14   39.81    2.63 
   4   4 -14   43.25    3.17 
  -4  -4 -14   42.28    2.50 
  -4   4  14   44.58    2.36 
  -4   4  14   46.10    2.65 
   4  -4  14   39.87    2.40 
  -4  -4 -14   42.41    3.18 
  -4   4  14   37.91    2.81 
  -4  -4 -14   36.86    2.50 
  -4   4  14   43.61    2.54 
  -4  -4  15    5.37    1.46 
  -4  -4  15    6.12    2.08 
  -4   4 -15    4.82    1.76 
  -4  -4  15    6.79    1.47 
   4  -4 -15    6.62    2.19 
  -4  -4  15    5.84    1.53 
   4   4 -15   10.51    2.16 
  -4  -4 -15    5.69    1.78 
  -4   4  15    8.28    1.53 
  -4   4  15    4.85    1.70 
  -4  -4 -15    5.03    2.02 
  -4   4  15    7.55    2.53 
   4  -4  15    6.06    1.31 
  -4   4  15    6.74    1.59 
  -4  -4  16    2.07    1.61 
  -4   4 -16    1.11    2.36 
   4  -4 -16    0.53    2.10 
  -4  -4  16    2.58    1.98 
  -4  -4 -16    7.09    2.14 
   4   4 -16    5.24    1.88 
   4  -4  16    5.17    1.85 
  -4   4  16    3.03    1.36 
  -4  -4 -16    5.37    1.77 
  -4   4  16    3.58    1.72 
  -4   4  16    2.20    1.82 
  -4  -4  17    2.47    1.33 
  -4   4 -17    1.21    2.46 
   4  -4  17    4.34    1.54 
  -4  -4 -17    0.62    2.14 
  -4  -4 -17    2.21    2.06 
  -4   4  17    1.76    1.69 
  -4  -4  18    1.10    1.35 
  -4   4 -18    2.13    2.01 
  -4  -4  18    0.52    1.90 
  -4  -4 -18    0.18    2.30 
   4  -4  18   -0.13    1.49 
   4   4 -18   -2.95    2.54 
  -4  -4  19    5.24    1.44 
  -4   4 -19    7.44    2.14 
  -4  -4  19    8.31    2.28 
  -4  -4 -19    7.97    1.93 
   4  -4  19   11.66    1.88 
   4   4 -19    8.32    3.56 
  -4  -4  20    1.13    1.42 
  -4   4 -20   -1.38    2.49 
   4  -4  20    2.74    2.20 
   4  -5   0   28.77    3.15 
  -4   5   0   28.83    4.48 
   4  -5  -1  147.50    6.17 
  -4   5  -1  159.51    7.12 
   4  -5   1  169.01    7.40 
   4  -5  -2  162.61    6.57 
  -4   5  -2  166.02    7.22 
   4  -5   2  165.55    7.36 
  -4   5   2  163.18    7.19 
  -4   5  -3  345.51   13.71 
   4  -5   3  327.17   12.75 
  -4   5   3  355.99   13.97 
  -4   5  -4  135.77    6.89 
   4  -5   4  155.19    7.23 
  -4   5   4  174.71    8.24 
  -4   5  -5  115.10    8.46 
   4  -5   5  111.42    8.03 
  -4   5   5  100.31    7.25 
   4  -5   6   47.27    5.06 
  -4   5   6   56.98    4.70 
   4  -5   7   52.51    4.59 
  -4   5  -8   18.41    2.78 
  -4  -5   8   16.39    1.47 
  -4  -5   8   13.35    1.31 
  -4   5  -8   16.70    1.91 
   4  -5   8   15.36    1.31 
   4  -5   8   14.39    1.50 
  -4  -5  -8   14.40    1.75 
  -4   5   8   13.08    1.40 
  -4  -5  -8   16.22    1.65 
  -4  -5  -8   15.45    2.18 
  -4   5   8   12.44    2.61 
  -4   5   8   13.63    1.64 
  -4   5  -9  156.82    8.41 
  -4   5  -9  159.28    9.19 
  -4  -5   9  157.95    6.08 
  -4  -5   9  146.55    5.65 
  -4  -5   9  163.12    6.31 
  -4   5  -9  164.04    6.91 
   4  -5   9  157.01    6.25 
  -4  -5  -9  173.05    7.17 
   4  -5   9  157.35    5.93 
  -4  -5  -9  155.71    6.34 
  -4   5   9  163.76    6.94 
  -4   5   9  173.27    6.59 
  -4   5   9  160.42    6.76 
  -4   5 -10   51.92    4.20 
  -4   5 -10   43.82    4.86 
  -4  -5  10   46.29    2.26 
  -4   5 -10   44.59    2.76 
  -4  -5  10   49.21    2.36 
  -4  -5  10   46.98    2.50 
   4  -5  10   43.50    2.08 
   4  -5  10   50.40    2.48 
  -4  -5 -10   41.82    2.49 
  -4  -5 -10   49.08    3.36 
  -4   5  10   44.61    2.23 
  -4   5  10   44.29    3.01 
  -4   5  10   42.82    2.29 
  -4   5  10   43.62    2.72 
  -4   5 -11    2.31    3.26 
  -4   5 -11    0.31    4.07 
  -4  -5  11    1.35    0.93 
  -4   5 -11    3.32    1.65 
  -4  -5  11    0.87    1.37 
  -4  -5  11    1.59    1.40 
   4  -5  11    1.76    1.24 
   4  -5  11    1.24    1.10 
  -4  -5 -11   -1.44    2.10 
  -4   5  11    0.64    1.30 
  -4   5  11    0.21    1.09 
  -4  -5 -11    2.47    2.00 
  -4   5  11   -0.75    2.16 
  -4  -5 -11    0.67    0.99 
  -4   5  11    2.14    1.56 
  -4   5 -12   15.68    3.18 
  -4   5 -12   14.98    3.60 
  -4  -5  12   13.96    1.63 
  -4   5 -12   17.61    2.92 
  -4  -5  12   15.39    1.63 
  -4  -5  12   15.91    1.80 
   4  -5  12   16.49    1.47 
   4  -5  12   15.54    1.78 
  -4  -5 -12   11.48    2.22 
  -4   5  12   12.73    1.74 
  -4   5  12   13.60    1.26 
  -4  -5 -12   16.53    1.79 
  -4   5  12   14.99    2.15 
  -4  -5 -12   10.40    1.56 
  -4   5  12   15.51    1.49 
  -4  -5  13   52.36    2.91 
  -4  -5  13   49.89    2.41 
  -4  -5  13   50.08    2.99 
  -4   5 -13   44.76    4.82 
  -4  -5  13   50.00    2.48 
   4  -5  13   48.48    2.95 
  -4  -5 -13   42.48    2.48 
  -4  -5 -13   49.40    3.20 
  -4   5  13   45.11    2.59 
   4   5 -13   44.64    3.29 
  -4  -5 -13   51.56    3.00 
  -4   5  13   48.28    3.16 
   4  -5  13   50.21    2.53 
  -4   5  13   48.96    2.80 
  -4  -5  14   23.50    2.16 
  -4   5 -14   27.71    3.08 
  -4  -5  14   20.60    1.71 
   4  -5  14   27.84    1.88 
   4  -5  14   20.15    2.05 
  -4  -5 -14   21.19    1.91 
  -4  -5 -14   23.88    2.40 
  -4   5  14   26.12    1.96 
   4   5 -14   23.21    2.47 
  -4  -5 -14   26.45    2.59 
  -4   5  14   21.00    2.71 
  -4   5  14   22.38    2.05 
   4  -5 -15   16.81    2.36 
  -4   5 -15   11.81    2.38 
  -4  -5  15   13.01    1.52 
   4   5 -15    8.21    2.12 
   4  -5  15    9.10    1.38 
  -4  -5 -15   11.38    2.04 
   4  -5  15   12.48    1.75 
  -4   5  15   11.17    1.47 
  -4  -5 -15   12.60    2.37 
  -4   5  15   13.85    2.68 
  -4   5  15   10.39    1.72 
  -4  -5  16    2.05    1.11 
  -4  -5  16    1.31    1.83 
  -4  -5  16    1.80    1.46 
   4  -5 -16   -0.98    1.82 
  -4   5 -16    1.97    2.42 
   4  -5  16    1.40    1.69 
  -4  -5 -16    5.49    2.12 
   4   5 -16    4.39    2.95 
  -4  -5 -16    1.63    2.23 
  -4   5  16    0.84    2.20 
  -4   5  16    2.13    1.97 
  -4  -5  17    1.38    1.33 
   4  -5 -17   -2.01    2.04 
  -4  -5  17   -0.14    1.57 
  -4   5 -17    0.93    2.57 
  -4  -5 -17    2.38    2.27 
   4  -5  17    1.60    1.66 
   4   5 -17    0.39    2.47 
  -4  -5 -17    0.55    1.99 
  -4  -5  18    1.20    1.15 
   4  -5 -18    1.01    1.96 
  -4   5 -18   -2.23    2.00 
   4  -5 -18   -0.12    1.87 
  -4  -5 -18    2.52    2.24 
   4  -5  18    1.66    1.47 
   4   5 -18   -2.19    2.79 
  -4  -5 -18   -0.85    2.10 
  -4  -5  19    3.11    1.26 
   4  -5 -19   -0.48    1.89 
  -4   5 -19   -1.13    2.25 
   4  -5 -19    1.27    1.81 
  -4  -5 -19    2.16    1.86 
   4  -5  19    1.67    1.49 
   4  -5 -20    1.45    2.92 
   4  -5 -20   -0.45    3.45 
  -4  -5 -20    0.62    3.10 
  -4   5  20    0.37    2.25 
  -4   6   0   15.45    3.87 
  -4   6  -1  126.73    6.14 
  -4   6   1  137.98    6.31 
  -4   6  -2   83.99    6.72 
  -4   6   2  100.69    7.37 
  -4   6  -3  178.82    9.47 
  -4   6   3  163.86    8.49 
  -4   6  -4  318.34   13.97 
  -4   6   4  364.07   15.20 
  -4   6  -5   14.69    3.82 
  -4   6   5   18.04    2.55 
  -4   6  -6  150.42    8.31 
   4  -6  -6  113.46    6.40 
  -4  -6   6  128.86    5.17 
  -4   6  -6  133.40    5.64 
  -4   6   6  144.28    7.86 
   4  -6   6  124.83    5.07 
   4  -6  -7  138.54    7.59 
  -4  -6   7  143.20    5.57 
  -4   6  -7  160.37    8.46 
  -4  -6   7  141.86    5.62 
   4  -6  -7  157.74    6.15 
  -4   6  -7  160.49    6.66 
   4  -6   7  137.53    5.32 
   4  -6   7  143.06    5.81 
  -4  -6  -7  156.94    6.26 
  -4   6   7  147.46    5.71 
   4  -6   7  151.64    8.76 
  -4  -6  -7  151.11    6.29 
  -4   6   7  138.95    6.36 
   4  -6  -8   81.05    5.30 
  -4  -6   8   90.96    3.96 
  -4   6  -8   93.03    6.68 
  -4   6  -8   87.08    4.26 
   4  -6  -8   90.58    4.11 
   4  -6   8   92.27    3.77 
   4  -6   8   89.33    3.96 
   4  -6   8   89.05    6.07 
  -4  -6  -8   87.44    4.15 
  -4   6   8   92.17    3.75 
  -4  -6  -8   89.22    3.95 
  -4  -6  -8   93.52    4.61 
  -4   6   8  103.29    4.95 
  -4   6   8   82.46    3.87 
   4  -6  -9    0.75    2.71 
  -4  -6   9    2.82    1.16 
  -4   6  -9    8.58    3.24 
  -4  -6   9    2.62    1.29 
   4  -6  -9    4.38    1.84 
  -4  -6   9    1.84    1.30 
  -4   6  -9    0.06    2.10 
   4  -6   9    3.38    1.28 
   4  -6   9    0.07    1.58 
   4  -6   9    2.37    3.41 
  -4  -6  -9    1.77    1.80 
  -4   6   9    2.87    1.23 
  -4  -6  -9    1.02    1.62 
  -4   6   9    0.65    1.62 
  -4  -6  -9    3.44    1.17 
  -4   6   9    2.49    1.06 
   4  -6 -10   15.05    2.54 
  -4  -6  10   12.88    1.68 
  -4   6 -10   18.47    2.34 
  -4  -6  10   16.47    1.30 
   4  -6 -10   15.36    1.48 
  -4  -6  10   14.85    1.65 
   4  -6  10   17.32    1.61 
  -4  -6 -10   16.87    1.77 
  -4  -6 -10   15.03    1.90 
  -4   6  10   17.43    1.81 
  -4   6  10   15.17    1.87 
   4  -6  10   14.66    1.75 
  -4   6  10   11.23    2.46 
   4  -6  10   12.57    3.71 
  -4   6  10   15.94    2.14 
   4  -6 -11   27.47    3.73 
  -4  -6  11   28.17    1.91 
   4  -6 -11   24.95    2.04 
  -4  -6  11   31.48    1.86 
  -4   6 -11   33.17    3.09 
  -4  -6  11   28.58    1.60 
  -4   6  11   28.83    1.85 
   4  -6  11   35.76    1.95 
   4  -6  11   28.42    4.37 
  -4  -6 -11   32.04    2.23 
  -4   6  11   35.14    2.17 
  -4   6  11   27.61    2.01 
   4  -6  11   29.78    2.11 
  -4  -6 -11   29.06    2.71 
  -4   6  11   32.04    2.75 
  -4  -6 -11   30.18    2.57 
  -4   6  11   31.46    2.16 
   4  -6 -12   44.64    2.59 
  -4  -6  12   41.12    2.09 
  -4  -6  12   39.02    2.31 
  -4   6 -12   39.69    2.65 
  -4  -6  12   38.10    2.50 
   4  -6  12   43.96    2.34 
  -4   6  12   43.82    2.44 
  -4  -6 -12   38.38    2.52 
  -4   6  12   44.06    2.46 
  -4   6  12   39.08    2.56 
   4  -6  12   36.14    2.39 
  -4  -6 -12   41.73    3.22 
  -4   6  12   36.23    2.76 
  -4  -6 -12   43.21    2.68 
  -4   6  12   42.74    2.57 
   4  -6 -13   26.11    2.32 
  -4  -6  13   24.55    1.80 
  -4  -6  13   24.73    1.80 
  -4   6 -13   25.37    2.71 
   4  -6  13   27.26    2.21 
  -4   6  13   26.12    1.82 
   4  -6  13   25.40    1.65 
  -4  -6 -13   22.05    2.33 
  -4   6  13   27.01    2.18 
  -4  -6 -13   25.29    1.96 
  -4  -6 -13   24.11    2.59 
  -4   6  13   23.98    2.32 
  -4   6  13   21.72    1.84 
  -4   6 -14    6.88    2.53 
  -4  -6  14    7.63    1.11 
   4  -6 -14    5.22    1.87 
  -4  -6  14   11.43    1.58 
   4  -6 -14    3.91    1.65 
   4  -6  14   10.35    1.53 
  -4  -6 -14    6.71    1.28 
  -4  -6 -14    5.48    1.47 
  -4   6  14    7.50    1.82 
   4  -6  14    8.14    1.53 
  -4  -6 -14    5.35    2.32 
  -4   6  14    8.01    2.06 
   4  -6 -15   19.86    2.55 
   4  -6 -15   22.79    2.27 
  -4   6 -15   20.64    2.87 
  -4  -6  15   19.65    1.62 
  -4  -6 -15   19.77    1.78 
  -4  -6 -15   16.43    2.26 
   4  -6  15   21.59    1.73 
  -4   6  15   19.55    1.90 
   4  -6  15   18.30    2.10 
  -4  -6 -15   23.99    2.48 
  -4   6  15   17.85    2.47 
  -4  -6  16   19.47    1.95 
   4  -6 -16   19.03    2.30 
   4  -6 -16   20.22    2.30 
  -4   6 -16   23.26    2.60 
   4  -6  16   22.08    1.94 
   4  -6  16   21.90    2.00 
  -4   6  16   17.00    1.98 
  -4  -6 -16   21.50    1.94 
  -4  -6 -16   16.04    2.24 
  -4   6  16   17.85    2.60 
   4  -6 -17    6.18    1.78 
  -4   6 -17    5.30    2.70 
   4  -6 -17   10.28    2.30 
   4  -6  17    8.86    1.80 
  -4   6  17    8.13    1.89 
  -4  -6 -17    9.28    2.34 
  -4  -6 -17    5.00    1.99 
  -4  -6  18    2.05    1.09 
   4  -6 -18    2.92    1.91 
  -4   6 -18    4.02    2.50 
   4  -6 -18    3.39    2.33 
   4  -6  18    1.82    1.68 
  -4   6  18    0.41    1.70 
  -4  -6 -18    2.15    2.08 
  -4  -6 -18    1.45    1.86 
  -4  -6  19    0.72    1.22 
   4  -6 -19    1.63    2.07 
  -4   6 -19    0.59    2.14 
   4  -6 -19    2.43    2.40 
  -4   6 -19    1.11    2.62 
  -4  -6 -19    0.06    2.17 
   4  -6  19    1.87    1.70 
  -4   6  19    1.46    2.06 
   4  -7   0  178.12    8.46 
  -4   7   0  182.90    8.96 
   4  -7  -1   95.24    7.66 
  -4   7  -1   99.55    7.12 
   4  -7   1   97.96    7.29 
  -4   7   1   98.25    7.24 
   4  -7  -2  269.41   12.07 
  -4   7  -2  263.77   12.44 
  -4   7   2  250.21   11.63 
   4  -7  -3   17.71    3.19 
  -4   7  -3   15.86    2.84 
  -4   7   3   19.55    3.73 
   4  -7  -4  235.54    8.70 
  -4   7  -4  246.91   11.80 
   4  -7   4  218.62    8.19 
  -4   7   4  252.95   11.45 
   4  -7   4  219.26    8.23 
  -4   7   4  247.58    9.31 
   4  -7  -5   71.21    5.46 
   4  -7  -5   62.48    3.74 
  -4   7  -5   67.97    6.42 
  -4  -7   5   67.15    4.01 
   4  -7   5   62.43    3.74 
  -4   7   5   61.69    5.38 
  -4  -7  -5   69.52    4.30 
  -4   7   5   70.15    4.23 
  -4   7   5   62.53    4.16 
   4  -7  -6  296.54   12.67 
   4  -7  -6  279.06   10.34 
  -4  -7   6  289.96   10.46 
  -4  -7   6  262.60    9.70 
  -4   7   6  288.01   12.75 
   4  -7   6  266.24    9.78 
  -4  -7  -6  283.72   10.44 
  -4   7   6  278.94   10.06 
  -4   7   6  277.98   10.22 
  -4   7   6  302.24   11.51 
   4  -7  -7  144.15    7.29 
  -4   7  -7  139.69    7.91 
  -4  -7   7  141.51    5.16 
  -4  -7   7  134.54    4.67 
   4  -7  -7  140.98    5.12 
   4  -7   7  145.94    4.96 
  -4  -7  -7  141.14    5.13 
  -4   7   7  140.24    4.69 
  -4   7   7  134.70    5.31 
  -4   7   7  153.59    6.09 
   4  -7  -8    9.41    3.23 
  -4   7  -8    8.43    4.02 
  -4  -7   8    5.35    1.51 
  -4  -7   8    8.21    1.04 
   4  -7  -8   10.37    1.35 
   4  -7   8   10.12    1.53 
  -4  -7  -8   10.29    1.58 
  -4   7   8    8.09    1.19 
  -4   7   8   12.05    1.35 
  -4  -7  -8    9.54    1.81 
  -4   7   8    9.14    1.87 
   4  -7  -9    5.33    2.65 
  -4   7  -9   14.02    4.54 
  -4  -7   9    7.31    1.34 
   4  -7  -9    6.65    1.64 
   4  -7   9   10.21    1.36 
  -4  -7  -9   10.77    1.65 
  -4  -7  -9   10.47    1.65 
  -4   7   9    7.47    1.34 
  -4   7   9    8.59    2.06 
  -4  -7  -9    6.13    2.51 
  -4   7   9    9.10    2.33 
   4  -7 -10  110.29    6.90 
  -4  -7  10  123.06    4.34 
  -4  -7  10  128.76    4.53 
   4  -7 -10  135.77    5.26 
   4  -7  10  124.61    4.43 
  -4  -7 -10  137.35    4.81 
  -4  -7 -10  127.05    5.10 
  -4   7  10  132.78    4.71 
  -4   7  10  133.51    4.88 
  -4  -7 -10  128.77    5.30 
  -4   7  10  122.29    5.20 
   4  -7 -11    5.11    1.75 
  -4  -7  11    5.25    0.93 
  -4  -7  11    3.85    1.13 
  -4   7  11    4.37    1.41 
   4  -7  11    1.23    1.45 
  -4  -7 -11    3.24    1.18 
  -4  -7 -11    5.01    1.86 
  -4   7  11    4.91    1.36 
  -4   7  11    6.97    1.71 
  -4   7  11    2.32    2.37 
   4  -7 -12   29.20    2.05 
  -4  -7  12   27.26    1.87 
  -4  -7  12   28.83    2.13 
  -4   7  12   25.96    1.90 
   4  -7  12   33.25    2.08 
  -4  -7 -12   33.66    2.15 
  -4  -7 -12   28.52    2.63 
  -4   7  12   27.24    1.93 
  -4  -7 -12   26.99    3.30 
  -4   7  12   29.20    2.85 
   4  -7 -13   24.70    2.48 
  -4  -7  13   21.78    1.49 
   4  -7 -13   20.56    2.27 
  -4  -7  13   19.63    1.69 
  -4  -7 -13   21.96    1.85 
  -4  -7 -13   22.93    2.42 
   4  -7  13   23.21    1.57 
  -4   7  13   24.11    2.18 
  -4  -7 -13   28.72    2.72 
  -4   7  13   22.05    2.51 
   4  -7 -14    8.47    2.08 
  -4  -7  14    2.22    1.45 
   4  -7 -14    5.26    2.03 
  -4  -7  14    4.36    1.38 
  -4  -7 -14    3.73    1.41 
  -4  -7 -14    4.41    2.43 
   4  -7  14    5.38    1.40 
  -4   7  14    8.30    1.98 
  -4  -7 -14    8.16    1.86 
  -4   7  14    3.17    1.97 
  -4  -7  15   41.16    2.51 
  -4  -7  15   39.74    2.22 
   4  -7 -15   40.60    2.70 
  -4   7 -15   35.58    2.96 
   4  -7 -15   37.21    2.81 
   4  -7  15   38.90    2.29 
  -4   7  15   42.15    2.41 
  -4  -7 -15   42.37    2.87 
  -4  -7 -15   33.77    2.75 
  -4   7  15   41.11    3.14 
  -4  -7  16   14.15    1.16 
   4  -7 -16   12.34    2.29 
  -4  -7  16   12.01    1.52 
  -4   7 -16   12.56    2.50 
   4  -7 -16   15.60    2.41 
  -4   7  16    8.63    1.82 
  -4  -7 -16   12.02    2.23 
  -4  -7 -16   12.17    2.30 
   4  -7 -17    3.92    2.02 
  -4   7 -17    2.82    2.31 
   4  -7 -17    2.47    1.82 
  -4   7  17    2.99    1.72 
  -4  -7 -17    1.44    2.07 
  -4  -7 -17    3.49    1.73 
   4  -7 -18    1.77    1.82 
  -4   7 -18    1.80    2.32 
   4  -7 -18    1.99    2.43 
  -4   7 -18    2.09    2.04 
  -4  -7 -18    2.02    1.99 
   4  -7  18    0.63    1.42 
  -4   7  18    1.28    1.79 
  -4  -7 -18    1.49    2.49 
  -4  -7  19    3.06    1.48 
   4  -7 -19    3.71    2.70 
  -4   7 -19    2.01    3.14 
   4  -7  19    2.16    1.96 
  -4   7  19    3.31    2.60 
   4  -8   0  208.72    9.63 
  -4   8   0  183.41    9.29 
   4  -8   0  181.15    7.09 
  -4  -8   0  181.05    7.14 
  -4   8   0  172.86    6.86 
   4  -8  -1   19.14    2.71 
  -4  -8   1   16.27    1.50 
  -4   8  -1   14.63    3.56 
   4  -8  -1   13.76    1.46 
  -4   8  -1   12.03    1.54 
  -4   8   1   12.30    3.55 
   4  -8   1   14.44    1.34 
   4  -8   1   13.44    2.67 
  -4   8   1   17.21    1.88 
  -4  -8  -1   14.38    1.74 
   4  -8  -2   80.65    6.25 
  -4  -8   2   65.18    4.22 
  -4   8  -2   74.89    6.39 
   4  -8  -2   80.24    4.76 
  -4   8  -2   76.04    4.84 
  -4   8   2   90.68    6.76 
   4  -8   2   74.63    4.44 
   4  -8   2   75.13    7.16 
  -4   8   2   71.50    4.71 
  -4  -8  -2   74.54    4.43 
  -4   8   2   70.75    4.78 
   4  -8  -3  120.58    6.90 
   4  -8  -3  103.33    4.26 
  -4  -8   3   99.57    4.66 
  -4   8  -3  118.10    7.17 
  -4   8  -3  115.42    5.27 
  -4  -8   3  112.36    4.48 
   4  -8   3  117.44    4.90 
   4  -8   3  125.79    7.25 
  -4   8   3  119.67    6.81 
  -4   8   3  116.25    4.87 
  -4  -8  -3  109.72    4.71 
  -4   8   3  105.82    5.70 
   4  -8  -4   31.95    3.80 
   4  -8  -4   34.64    2.12 
  -4   8  -4   32.58    3.78 
  -4  -8   4   37.44    1.96 
  -4   8  -4   37.41    2.69 
  -4   8   4   41.07    3.67 
   4  -8   4   41.70    4.49 
   4  -8   4   36.57    2.26 
  -4  -8  -4   36.01    2.21 
  -4   8   4   33.58    2.35 
  -4   8   4   37.20    3.19 
   4  -8  -5   64.83    4.36 
  -4   8  -5   62.30    5.47 
   4  -8  -5   53.14    2.48 
  -4  -8   5   61.86    2.76 
  -4   8  -5   61.34    3.30 
   4  -8   5   65.80    5.32 
   4  -8   5   58.97    2.86 
  -4   8   5   56.83    2.34 
  -4   8   5   57.54    2.79 
  -4  -8  -5   56.57    2.90 
  -4   8   5   62.01    3.40 
   4  -8  -6   61.65    4.89 
  -4  -8   6   65.80    2.77 
  -4   8  -6   74.19    5.20 
  -4   8  -6   72.73    3.65 
  -4  -8   6   60.60    2.83 
   4  -8  -6   57.64    2.76 
  -4   8  -6   59.87    3.22 
   4  -8   6   61.37    2.71 
  -4  -8  -6   61.65    3.09 
  -4   8   6   65.16    2.67 
   4  -8   6   68.64    6.02 
  -4   8   6   67.77    3.14 
   4  -8   6   63.59    3.01 
  -4   8   6   65.57    3.62 
   4  -8  -7  135.91    7.23 
  -4  -8   7  138.49    5.26 
  -4   8  -7  144.17    8.14 
  -4  -8   7  143.95    5.28 
   4  -8  -7  140.00    5.41 
  -4   8  -7  141.90    5.87 
   4  -8   7  141.43    5.18 
   4  -8   7  151.08    5.64 
   4  -8   7  155.01    8.35 
  -4   8   7  141.21    5.06 
  -4   8   7  134.13    5.16 
  -4  -8  -7  142.78    5.60 
  -4  -8  -7  143.52    5.93 
  -4   8   7  144.35    5.99 
   4  -8  -8  121.94    7.48 
  -4  -8   8  137.82    4.58 
  -4   8  -8  132.25    7.46 
  -4  -8   8  138.52    4.74 
   4  -8  -8  152.73    5.02 
  -4   8  -8  139.58    5.24 
   4  -8   8  142.53    4.60 
   4  -8   8  142.14    4.83 
   4  -8   8  138.56    7.93 
  -4   8   8  137.68    4.54 
  -4   8   8  155.05    5.21 
  -4  -8  -8  143.58    4.97 
  -4  -8  -8  142.73    5.54 
  -4   8   8  134.62    5.23 
   4  -8  -9  100.15    7.50 
  -4  -8   9  104.23    3.96 
  -4   8  -9  121.27    9.15 
  -4  -8   9  121.34    4.31 
   4  -8  -9  122.05    4.80 
  -4   8  -9  113.01    4.64 
   4  -8   9  124.70    4.40 
   4  -8   9  116.79    4.42 
   4  -8   9  130.44    7.91 
  -4   8   9  116.21    4.44 
  -4   8   9  113.74    4.49 
  -4  -8  -9  119.64    4.71 
  -4  -8  -9  119.01    5.13 
  -4   8   9  107.75    4.77 
  -4  -8  10   14.95    1.40 
   4  -8 -10   18.30    2.13 
   4  -8  10   16.76    1.71 
   4  -8  10   16.45    1.96 
  -4  -8 -10   17.98    1.82 
  -4   8  10   16.45    1.54 
  -4   8  10   16.90    1.56 
  -4  -8 -10   17.39    2.27 
  -4   8  10   18.53    2.50 
  -4  -8  11   23.09    1.88 
   4  -8 -11   23.65    2.03 
  -4  -8  11   20.81    1.98 
   4  -8  11   20.75    1.78 
   4  -8  11   16.71    1.89 
  -4  -8 -11   16.34    1.67 
  -4  -8 -11   22.70    2.93 
  -4   8  11   17.25    1.88 
  -4   8  11   19.80    2.37 
  -4  -8 -11   18.90    2.46 
  -4   8  11   20.80    2.53 
   4  -8 -12   35.59    2.70 
  -4  -8  12   32.35    2.00 
   4  -8 -12   34.51    2.48 
  -4  -8  12   29.91    2.25 
  -4  -8 -12   31.37    1.96 
  -4  -8 -12   37.59    2.83 
   4  -8  12   29.98    2.01 
  -4   8  12   34.96    2.42 
  -4   8  12   31.22    3.06 
   4  -8 -13    9.89    2.20 
  -4  -8  13    8.08    1.31 
   4  -8 -13   11.62    1.91 
  -4  -8  13   10.10    1.42 
  -4  -8 -13    9.52    1.35 
  -4  -8 -13   13.30    2.53 
   4  -8  13    9.52    1.50 
  -4   8  13   13.73    1.96 
  -4  -8 -13   13.06    2.37 
  -4   8  13   11.66    2.82 
  -4  -8  14   -1.29    1.57 
  -4  -8  14    2.46    1.19 
   4  -8 -14    2.84    1.41 
   4  -8 -14    1.49    1.85 
   4  -8  14    3.18    1.56 
  -4  -8 -14    2.07    2.24 
  -4   8  14    2.30    1.61 
  -4  -8 -14    0.99    2.31 
  -4   8  14    0.27    2.37 
  -4  -8  15    0.83    1.31 
   4  -8 -15   -3.23    2.11 
  -4  -8  15   -0.69    1.40 
   4  -8 -15    0.81    2.13 
  -4  -8 -15   -0.48    2.12 
  -4   8  15    2.21    1.69 
  -4  -8 -15    5.30    2.19 
  -4  -8  16    3.44    1.20 
   4  -8 -16    7.71    2.02 
   4  -8 -16    4.19    2.07 
  -4   8 -16    1.56    2.26 
  -4  -8 -16    4.56    2.17 
  -4   8  16    1.64    1.64 
  -4  -8 -16    1.69    2.09 
  -4  -8  17   11.43    1.25 
   4  -8 -17   10.86    2.01 
   4  -8 -17   12.11    2.41 
  -4  -8 -17    8.50    2.57 
  -4   8  17   11.01    1.68 
  -4  -8 -17    8.58    1.80 
   4  -8 -18    4.23    1.99 
  -4   8  18    3.53    1.94 
  -4  -8 -18    2.99    2.28 
   4  -9   0   37.84    4.02 
  -4   9   0   41.27    4.50 
   4  -9   0   35.73    2.05 
  -4  -9   0   32.39    1.87 
  -4   9   0   31.97    2.38 
   4  -9  -1    3.60    2.54 
  -4  -9   1    6.23    1.65 
  -4   9  -1    4.79    3.38 
   4  -9  -1    6.03    1.26 
  -4   9  -1    7.88    1.52 
  -4   9   1   10.20    3.60 
   4  -9   1    6.61    1.74 
   4  -9   1    9.15    3.11 
  -4   9   1    7.67    1.66 
  -4  -9  -1    7.43    1.79 
  -4   9   1    6.67    2.36 
   4  -9  -2   21.63    2.97 
  -4  -9   2   15.74    1.90 
  -4   9  -2   16.30    3.78 
   4  -9  -2   18.12    1.48 
  -4   9  -2   20.19    2.14 
  -4   9   2   22.30    3.07 
   4  -9   2   17.78    1.90 
   4  -9   2   17.51    3.32 
  -4   9   2   17.27    1.90 
  -4  -9  -2   17.07    1.68 
  -4   9   2   14.30    2.59 
   4  -9  -3   92.91    5.70 
  -4  -9   3  102.41    4.31 
  -4   9  -3  108.40    6.68 
   4  -9  -3  101.30    3.92 
  -4  -9   3   92.94    3.82 
  -4   9  -3  104.21    4.23 
   4  -9   3  103.33    4.20 
   4  -9   3  102.07    6.24 
  -4   9   3   98.33    4.15 
  -4  -9  -3  111.21    4.30 
  -4   9   3  105.18    4.73 
   4  -9  -4  111.22    6.98 
  -4  -9   4  110.31    4.65 
  -4   9  -4  111.74    7.20 
   4  -9  -4  109.66    4.36 
  -4  -9   4  112.75    4.29 
  -4   9  -4  108.69    4.68 
   4  -9   4  117.17    4.77 
   4  -9   4  110.15    7.09 
  -4   9   4  119.57    4.89 
  -4  -9  -4  111.05    4.55 
  -4  -9  -4  111.87    5.01 
  -4   9   4  110.59    5.20 
   4  -9  -5   32.71    3.94 
  -4   9  -5   38.39    2.86 
  -4   9  -5   33.86    4.51 
   4  -9  -5   35.29    2.04 
  -4  -9   5   32.82    1.93 
   4  -9   5   35.26    2.25 
  -4  -9  -5   36.22    2.42 
   4  -9   5   35.90    4.36 
  -4  -9  -5   32.46    2.64 
  -4   9   5   32.80    3.06 
   4  -9  -6   56.49    5.20 
  -4   9  -6   53.96    5.70 
   4  -9  -6   53.45    2.62 
  -4  -9   6   48.07    1.76 
  -4   9  -6   49.36    2.71 
   4  -9   6   50.72    4.57 
   4  -9   6   50.02    2.55 
  -4  -9  -6   49.29    2.59 
  -4   9   6   51.83    2.54 
  -4  -9  -6   52.02    3.25 
  -4   9   6   50.94    3.06 
   4  -9  -7   25.23    3.38 
   4  -9  -7   26.01    1.70 
  -4   9  -7   19.25    4.42 
  -4  -9   7   25.97    1.62 
  -4  -9   7   22.95    1.35 
  -4   9  -7   25.97    2.50 
   4  -9   7   20.85    4.76 
   4  -9   7   23.04    2.15 
  -4  -9  -7   24.57    2.00 
  -4   9   7   25.03    2.24 
  -4  -9  -7   23.20    2.75 
  -4   9   7   25.44    2.75 
   4  -9  -8  112.39    9.01 
  -4  -9   8  124.68    4.90 
  -4   9  -8   99.39    7.18 
  -4  -9   8  115.69    4.41 
   4  -9  -8  124.70    4.94 
  -4   9  -8  113.10    4.93 
   4  -9   8  112.16    4.40 
   4  -9   8  116.94    4.65 
   4  -9   8   97.76    6.30 
  -4   9   8  111.40    4.28 
  -4   9   8  113.36    4.65 
  -4  -9  -8  123.25    4.86 
  -4  -9  -8  118.23    5.31 
  -4   9   8  113.08    4.96 
  -4  -9   9   38.38    2.29 
   4  -9  -9   39.23    2.63 
  -4  -9   9   42.22    2.47 
  -4   9  -9   42.10    2.72 
   4  -9   9   39.60    2.32 
   4  -9   9   38.45    2.28 
  -4   9   9   35.74    2.24 
  -4   9   9   36.34    2.51 
  -4  -9  -9   34.62    2.12 
  -4  -9  -9   34.73    2.85 
  -4   9   9   37.40    3.10 
  -4  -9  10   61.45    2.68 
   4  -9 -10   60.84    3.12 
  -4   9 -10   70.64    3.92 
  -4   9 -10   56.88    3.29 
   4  -9  10   61.70    2.93 
   4  -9  10   56.85    2.98 
  -4   9  10   61.63    3.05 
  -4   9  10   55.74    2.88 
  -4  -9 -10   57.71    3.29 
  -4   9  10   54.27    3.69 
  -4  -9  11   91.21    3.68 
   4  -9 -11   78.36    3.58 
  -4   9 -11   82.17    3.98 
  -4   9 -11   72.95    3.71 
   4  -9  11   89.77    3.85 
   4  -9  11   84.14    3.75 
  -4   9  11   84.40    3.84 
  -4  -9 -11   81.81    3.81 
  -4  -9 -11   79.78    4.18 
  -4   9  11   86.26    4.43 
   4  -9 -12   22.44    2.67 
  -4  -9  12   22.82    1.83 
   4  -9 -12   18.01    2.12 
  -4   9 -12   22.19    2.57 
  -4  -9  12   19.46    1.80 
  -4   9 -12   17.11    2.19 
  -4  -9 -12   21.30    1.91 
   4  -9  12   18.64    1.98 
  -4   9  12   20.21    2.21 
   4  -9  12   21.78    2.02 
  -4  -9 -12   20.17    2.69 
  -4   9  12   18.22    2.55 
  -4   9 -13    4.85    2.43 
  -4  -9  13    7.71    1.25 
   4  -9 -13    7.78    1.63 
  -4  -9  13    9.98    1.52 
   4  -9 -13    8.34    2.28 
  -4   9 -13    8.52    2.12 
   4  -9  13    7.65    1.25 
   4  -9  13    7.89    1.26 
  -4   9  13    7.21    1.37 
  -4   9  13    9.51    2.85 
  -4  -9  14   12.84    1.58 
   4  -9 -14   10.79    2.16 
  -4  -9  14   14.18    1.52 
   4  -9 -14   15.92    2.55 
  -4   9 -14   10.07    2.61 
   4  -9  14   18.53    2.03 
  -4   9  14   14.46    1.85 
  -4  -9  15   13.74    1.52 
   4  -9 -15   15.38    2.17 
  -4  -9  15   14.15    1.55 
   4  -9 -15   16.17    2.53 
  -4   9 -15   13.17    2.37 
   4  -9  15   13.87    1.80 
  -4   9  15   14.72    1.80 
  -4  -9 -15   13.05    2.24 
  -4  -9  16    7.40    1.48 
   4  -9 -16    6.44    2.05 
  -4   9 -16    9.66    2.06 
   4  -9 -16    7.30    2.54 
   4  -9 -16    6.78    2.79 
   4  -9  16   10.03    1.76 
  -4  -9 -16    6.97    1.90 
  -4   9  16   10.03    1.79 
  -4  -9  17    3.38    1.30 
   4  -9 -17    1.56    2.17 
  -4   9 -17   -0.44    2.28 
   4  -9  17    2.24    1.50 
  -4   9  17    2.90    1.96 
  -4  -9 -17    1.80    2.15 
   4 -10   0   45.02    3.82 
   4 -10   0   42.65    2.30 
  -4 -10   0   35.66    2.22 
  -4  10   0   41.80    2.81 
   4 -10  -1   53.25    4.68 
  -4  10  -1   45.31    2.08 
   4 -10  -1   48.55    2.14 
  -4 -10   1   48.16    2.12 
   4 -10   1   48.84    2.16 
  -4 -10  -1   49.55    2.52 
  -4  10   1   52.16    2.82 
   4 -10   1   54.10    4.18 
  -4  10   1   49.40    3.37 
   4 -10  -2   26.26    3.58 
  -4  10  -2   21.49    2.23 
   4 -10  -2   19.29    1.87 
  -4 -10   2   20.78    2.25 
   4 -10   2   23.69    1.81 
  -4 -10  -2   22.24    2.06 
  -4  10   2   25.83    2.28 
   4 -10   2   16.66    3.03 
  -4  10   2   24.11    2.85 
   4 -10  -3   37.37    3.65 
  -4 -10   3   37.28    2.34 
  -4  10  -3   32.41    4.34 
   4 -10  -3   36.93    2.23 
  -4 -10   3   37.55    2.31 
  -4  10  -3   45.20    2.65 
   4 -10   3   43.96    2.67 
   4 -10   3   46.81    4.93 
  -4  10   3   44.43    2.70 
  -4 -10  -3   42.94    2.90 
  -4  10   3   32.19    3.07 
   4 -10  -4    6.05    2.74 
  -4 -10   4    6.89    2.21 
  -4  10  -4    5.33    4.08 
   4 -10  -4    7.01    1.32 
  -4 -10   4    5.06    1.06 
  -4  10  -4    5.60    2.27 
   4 -10   4    7.78    1.62 
   4 -10   4    7.31    3.57 
  -4  10   4    6.81    1.34 
  -4 -10  -4    6.52    1.98 
  -4  10   4    5.74    2.30 
   4 -10  -5   27.44    3.37 
  -4 -10   5   29.40    2.24 
  -4  10  -5   30.04    4.96 
   4 -10  -5   27.85    2.01 
  -4 -10   5   28.29    1.46 
  -4  10  -5   30.98    2.50 
   4 -10   5   25.64    2.12 
   4 -10   5   27.38    4.34 
  -4  10   5   27.53    1.87 
  -4 -10  -5   31.60    2.49 
  -4 -10  -5   23.21    2.66 
  -4  10   5   25.72    2.38 
   4 -10  -6   15.30    3.05 
  -4 -10   6   19.23    2.15 
  -4  10  -6   14.77    4.57 
   4 -10  -6   20.06    1.59 
  -4 -10   6   18.52    1.68 
  -4  10  -6   18.51    2.37 
   4 -10   6   15.17    1.57 
   4 -10   6   16.05    3.41 
  -4  10   6   21.99    1.99 
  -4 -10  -6   17.46    2.00 
  -4 -10  -6   14.54    2.38 
  -4  10   6   17.58    2.70 
   4 -10  -7  123.82    4.95 
  -4 -10   7  123.30    5.17 
  -4  10  -7  123.11    5.51 
   4 -10   7  139.25    5.52 
  -4 -10  -7  126.35    5.22 
  -4  10   7  126.06    5.23 
  -4 -10  -7  126.77    5.71 
  -4  10   7  118.26    5.44 
  -4 -10   8   77.34    3.45 
   4 -10  -8   75.91    3.71 
  -4  10  -8   71.46    3.86 
  -4 -10   8   69.56    3.24 
  -4  10   8   76.67    3.80 
   4 -10   8   75.78    3.70 
  -4 -10  -8   74.05    4.09 
  -4  10   8   78.34    4.26 
  -4 -10   9   22.36    1.46 
   4 -10  -9   24.46    2.05 
  -4 -10   9   25.15    1.58 
  -4  10  -9   26.66    2.77 
  -4 -10  -9   22.18    2.21 
  -4  10   9   26.35    2.29 
  -4 -10  -9   29.61    2.48 
  -4  10   9   22.25    2.95 
  -4 -10  10   39.98    2.25 
   4 -10 -10   43.66    2.62 
  -4 -10  10   36.47    2.14 
  -4  10 -10   36.68    2.53 
   4 -10  10   38.77    2.35 
  -4 -10 -10   35.10    2.48 
  -4  10  10   45.18    2.77 
  -4 -10 -10   38.46    3.06 
  -4  10  10   38.25    3.24 
  -4 -10  11    6.36    1.30 
   4 -10 -11    9.71    1.93 
  -4  10 -11    9.61    2.35 
  -4 -10 -11    6.24    1.63 
  -4  10  11    5.75    1.43 
   4 -10  11    8.83    1.91 
  -4 -10 -11    8.47    1.87 
  -4  10  11    9.30    2.52 
  -4 -10  12    0.18    1.16 
   4 -10 -12    0.62    1.74 
  -4  10 -12    2.00    2.02 
   4 -10  12    1.84    1.54 
  -4  10  12   -0.46    1.81 
  -4 -10 -12   -2.63    2.13 
  -4  10  12    3.74    2.35 
  -4 -10  13   30.78    1.82 
   4 -10 -13   30.59    2.25 
  -4  10 -13   25.44    2.54 
  -4 -10  13   30.31    1.91 
  -4  10  13   27.79    2.17 
   4 -10  13   30.69    1.90 
  -4 -10 -13   29.15    2.69 
  -4 -10  14    5.85    1.31 
   4 -10 -14    6.58    1.53 
  -4 -10  14    2.03    1.39 
  -4 -10  14    4.03    2.49 
  -4  10 -14    4.45    2.15 
   4 -10  14    5.29    1.90 
  -4  10  14    2.38    1.72 
  -4 -10  15    3.18    1.46 
   4 -10 -15    2.00    2.04 
  -4  10 -15   -0.18    2.11 
  -4 -10  15    0.20    2.22 
  -4  10  15    1.78    1.62 
   4 -10  15   -0.33    1.64 
  -4 -10  16    5.00    1.34 
   4 -10 -16    6.13    2.32 
   4 -10 -16    5.27    2.96 
  -4  10 -16    4.30    2.17 
   4 -10  16    4.83    1.91 
  -4 -10 -16    6.55    1.93 
  -4  10  16    5.67    2.30 
   4 -11   0    5.29    3.78 
   4 -11   0    2.08    1.56 
  -4 -11   0    0.52    1.74 
  -4  11   0    4.88    1.77 
  -4  11   0    3.99    2.44 
   4 -11  -1   81.04    6.00 
  -4  11  -1   86.05    4.12 
   4 -11  -1   84.93    3.73 
  -4 -11   1   85.49    3.95 
   4 -11   1   92.27    3.96 
  -4 -11  -1   85.23    3.97 
  -4  11   1   91.05    4.38 
   4 -11   1   83.86    6.52 
  -4  11   1   93.95    4.91 
   4 -11  -2   14.85    3.68 
  -4  11  -2   21.38    1.84 
   4 -11  -2   19.68    1.74 
  -4 -11   2   21.56    1.76 
   4 -11   2   21.86    1.88 
  -4 -11  -2   20.95    2.09 
  -4  11   2   19.82    1.66 
   4 -11   2   16.65    4.58 
  -4  11   2   16.98    2.77 
   4 -11  -3    3.87    1.65 
  -4 -11   3    9.28    1.49 
  -4 -11   3    4.36    1.39 
  -4  11  -3    2.26    1.89 
   4 -11   3    6.61    1.71 
  -4  11   3    3.21    1.70 
  -4 -11  -3    3.82    2.05 
  -4  11   3    4.44    2.78 
   4 -11  -4   61.77    2.84 
  -4  11  -4   65.46    3.60 
  -4 -11   4   58.35    2.87 
  -4 -11   4   67.01    3.63 
  -4 -11  -4   65.38    3.12 
   4 -11   4   54.94    3.12 
  -4  11   4   60.82    3.28 
   4 -11   4   69.77    3.41 
  -4  11   4   60.84    3.88 
   4 -11  -5   -0.04    1.45 
  -4  11  -5    0.89    1.48 
  -4 -11   5    1.13    1.41 
  -4 -11   5    3.60    1.49 
  -4 -11  -5   -2.77    1.94 
   4 -11   5   -0.16    2.11 
  -4  11   5    0.00    1.46 
   4 -11   5   -0.24    1.57 
  -4 -11  -5    0.21    2.08 
  -4  11   5    2.03    2.28 
   4 -11  -6   57.21    3.30 
  -4 -11   6   51.70    2.95 
  -4 -11   6   54.61    2.72 
  -4  11  -6   57.53    3.33 
   4 -11   6   46.46    2.71 
  -4  11   6   51.93    2.70 
  -4 -11  -6   47.09    2.52 
  -4 -11  -6   45.07    3.02 
  -4  11   6   57.15    3.95 
   4 -11  -7   33.67    2.56 
  -4 -11   7   26.71    2.01 
  -4  11  -7   29.68    2.55 
   4 -11   7   31.42    2.31 
  -4 -11  -7   31.37    2.43 
  -4  11   7   28.36    2.00 
  -4 -11  -7   28.54    2.90 
  -4  11   7   30.37    3.07 
  -4 -11   8   27.37    2.05 
   4 -11  -8   26.29    2.18 
  -4 -11   8   35.06    2.90 
  -4 -11   8   30.46    2.28 
  -4  11  -8   30.57    2.67 
   4 -11   8   24.71    2.20 
  -4  11   8   27.03    1.97 
  -4 -11  -8   25.53    1.93 
  -4 -11  -8   25.80    2.60 
  -4  11   8   31.18    2.98 
  -4 -11   9    4.12    1.29 
   4 -11  -9    2.13    1.56 
  -4 -11   9    2.90    2.01 
  -4 -11   9    3.23    1.23 
  -4  11  -9    3.50    1.99 
   4 -11   9   -1.75    1.85 
  -4  11   9    4.51    1.66 
  -4 -11  -9    1.60    1.54 
  -4 -11  -9    1.50    2.75 
  -4  11   9    3.36    2.45 
  -4 -11  10   19.61    1.91 
   4 -11 -10   20.17    2.10 
  -4 -11  10   20.19    2.62 
  -4 -11  10   17.03    1.87 
  -4  11 -10   18.38    2.59 
   4 -11  10   21.13    1.98 
  -4  11  10   21.76    1.95 
  -4 -11 -10   15.16    2.01 
  -4  11  10   18.10    2.67 
  -4 -11  11   17.50    1.74 
   4 -11 -11   18.79    2.46 
  -4 -11  11   18.16    1.71 
  -4 -11  11   24.65    2.41 
  -4  11 -11   19.69    2.37 
   4 -11  11   18.34    1.67 
  -4  11  11   17.51    1.90 
  -4 -11 -11   14.91    2.49 
  -4  11  11   15.78    2.49 
  -4 -11  12   18.94    1.52 
   4 -11 -12   19.99    1.83 
  -4  11 -12   20.10    2.47 
  -4 -11  12   26.77    2.53 
  -4  11  12   23.54    2.08 
   4 -11  12   25.05    2.07 
  -4 -11 -12   16.62    2.45 
  -4 -11  13    7.11    1.45 
   4 -11 -13    5.16    2.32 
  -4  11 -13    4.03    1.97 
  -4 -11  13    4.16    1.88 
  -4  11  13    3.03    1.74 
   4 -11  13    7.43    1.52 
  -4 -11 -13    7.34    2.05 
  -4 -11  14    6.72    1.40 
   4 -11 -14    6.41    2.03 
  -4  11 -14    7.46    2.16 
  -4 -11  14    8.74    2.41 
  -4  11  14    6.26    1.83 
   4 -11  14    8.79    1.73 
  -4 -11 -14    9.79    2.00 
  -4 -11  15   22.28    2.17 
   4 -11 -15   23.23    2.79 
  -4  11 -15   23.19    2.54 
   4 -11 -15   18.93    2.65 
  -4  11  15   25.60    2.34 
   4 -11  15   24.16    1.88 
   4 -11  15   27.04    2.68 
   4 -12   0   -0.33    1.17 
  -4 -12   0   -1.60    1.65 
  -4  12   0   -1.07    1.64 
  -4  12   0    1.64    1.77 
   4 -12  -1   40.54    2.32 
  -4  12  -1   43.26    3.80 
  -4  12  -1   44.19    2.87 
  -4 -12   1   38.16    2.32 
  -4  12   1   44.81    2.77 
  -4 -12  -1   41.13    2.38 
  -4  12   1   31.61    3.17 
   4 -12   1   39.95    2.49 
   4 -12  -2   39.11    2.52 
  -4  12  -2   33.68    2.54 
  -4 -12   2   35.27    2.80 
   4 -12   2   36.89    2.23 
  -4  12   2   39.91    2.71 
  -4 -12  -2   28.73    2.61 
  -4  12   2   27.95    3.36 
   4 -12  -3   65.83    3.21 
  -4  12  -3   65.17    3.35 
  -4 -12   3   70.75    3.65 
   4 -12   3   71.18    3.43 
  -4  12   3   71.77    3.51 
  -4 -12  -3   61.91    3.29 
  -4  12   3   65.76    3.96 
   4 -12  -4    1.42    1.72 
  -4  12  -4   -0.61    1.72 
  -4 -12   4    0.07    1.28 
  -4 -12   4   -0.37    2.02 
  -4 -12  -4   -0.04    2.07 
   4 -12   4    5.02    2.03 
  -4  12   4    1.01    1.64 
   4 -12   4    1.12    1.38 
  -4  12   4   -2.46    2.42 
   4 -12  -5   49.79    2.82 
  -4  12  -5   55.11    3.32 
  -4 -12   5   50.57    2.60 
  -4 -12   5   48.44    2.97 
  -4 -12  -5   49.52    2.98 
   4 -12   5   54.16    3.43 
  -4  12   5   53.25    3.07 
   4 -12   5   52.49    3.03 
  -4  12   5   54.43    3.88 
   4 -12  -6    2.42    1.81 
  -4  12  -6    6.74    1.82 
  -4 -12   6    5.62    1.39 
  -4 -12   6    4.69    1.51 
  -4 -12  -6    5.27    1.96 
   4 -12   6    3.18    2.39 
  -4  12   6    5.25    1.96 
   4 -12   6    6.32    1.74 
  -4 -12  -6    7.27    2.36 
  -4  12   6   -0.48    2.48 
   4 -12  -7   67.72    3.61 
  -4  12  -7   70.79    4.01 
  -4 -12   7   73.48    4.19 
  -4 -12   7   70.35    4.07 
  -4 -12  -7   70.26    3.81 
   4 -12   7   78.85    4.55 
  -4  12   7   74.06    4.01 
   4 -12   7   78.46    3.89 
  -4 -12  -7   74.24    4.43 
  -4  12   7   82.04    4.81 
   4 -12  -8    9.45    1.79 
  -4  12  -8    7.77    1.52 
  -4 -12   8   10.89    1.68 
  -4 -12   8    9.70    1.99 
  -4 -12  -8    9.54    1.59 
   4 -12   8   11.43    2.34 
  -4  12   8   10.84    2.07 
   4 -12   8   11.39    1.91 
  -4 -12  -8    8.58    2.28 
  -4  12   8    8.88    2.64 
   4 -12  -9    1.88    1.88 
  -4  12  -9    1.68    2.05 
  -4 -12   9    2.33    1.50 
  -4 -12   9    1.55    2.37 
  -4 -12  -9    3.63    1.67 
   4 -12   9    5.05    2.47 
  -4  12   9    0.67    1.74 
   4 -12   9    2.88    1.28 
  -4 -12  -9    0.06    2.61 
  -4  12   9    3.03    2.55 
  -4 -12  10   37.64    2.13 
   4 -12 -10   40.84    2.44 
  -4 -12  10   34.13    2.40 
  -4 -12  10   43.70    2.86 
  -4  12 -10   34.80    2.35 
   4 -12  10   42.42    2.37 
   4 -12  10   35.57    3.07 
  -4  12  10   34.87    2.40 
  -4 -12 -10   38.24    2.67 
  -4 -12  11    5.46    1.46 
   4 -12 -11    3.18    1.78 
  -4 -12  11    7.19    2.51 
  -4  12 -11    4.92    2.06 
   4 -12  11    4.04    1.83 
   4 -12  11    6.48    2.41 
  -4  12  11    5.36    1.47 
  -4 -12 -11    3.50    2.40 
  -4 -12  12    9.79    1.65 
   4 -12 -12    5.83    2.14 
  -4 -12  12   10.02    2.58 
  -4  12 -12    9.34    2.40 
   4 -12  12   10.87    1.70 
   4 -12  12    9.45    2.30 
  -4  12  12    7.79    1.76 
  -4 -12 -12    8.81    2.21 
  -4 -12  13    9.10    1.78 
   4 -12 -13    8.14    2.44 
  -4 -12  13   10.20    2.73 
  -4  12 -13   10.26    2.15 
   4 -12  13   10.06    2.25 
  -4  12  13   10.55    2.00 
  -4 -12 -13   10.20    1.93 
  -4  12 -14   12.48    3.47 
  -4  12 -14   15.12    2.41 
   4 -12  14   14.39    1.96 
  -4 -12 -14   11.21    2.15 
  -4 -12 -14   12.09    1.62 
   4 -13   0   10.89    1.76 
  -4 -13   0   17.44    2.30 
  -4  13   0   12.74    2.39 
  -4  13   0    9.94    2.24 
   4 -13  -1   34.35    2.53 
  -4  13  -1   32.27    3.25 
  -4  13  -1   33.57    2.84 
  -4 -13   1   38.03    2.93 
  -4  13   1   37.26    2.70 
  -4 -13  -1   36.68    2.84 
  -4  13   1   35.25    3.55 
   4 -13   1   31.70    2.17 
   4 -13  -2    5.88    1.56 
  -4  13  -2    8.14    2.63 
  -4  13  -2    5.52    1.40 
  -4 -13   2   10.73    2.01 
  -4  13   2    7.30    1.62 
  -4 -13  -2    9.83    2.01 
  -4  13   2    7.60    3.24 
   4 -13   2    5.92    1.81 
   4 -13  -3    7.57    1.77 
  -4  13  -3    6.22    1.73 
  -4  13  -3    9.19    2.68 
  -4 -13  -3    5.08    1.97 
   4 -13   3    7.10    1.58 
  -4  13   3    2.71    2.71 
  -4  13   3    8.78    1.97 
   4 -13  -4   41.31    2.69 
  -4  13  -4   39.16    2.85 
  -4 -13   4   46.88    2.84 
   4 -13   4   40.49    2.60 
  -4  13   4   42.59    2.55 
  -4 -13  -4   44.15    2.72 
  -4  13   4   44.76    3.17 
   4 -13  -5   21.29    1.91 
  -4 -13   5   20.10    1.98 
  -4  13  -5   20.30    2.38 
   4 -13   5   19.99    2.24 
  -4 -13  -5   18.30    2.37 
   4 -13   5   18.56    2.65 
  -4  13   5   26.91    2.23 
  -4  13   5   23.92    2.77 
   4 -13  -6   22.43    2.03 
  -4 -13   6   24.15    2.30 
  -4  13  -6   18.74    2.35 
   4 -13   6   24.60    2.04 
  -4 -13  -6   28.86    2.46 
   4 -13   6   19.95    2.60 
  -4  13   6   22.24    2.21 
  -4  13   6   25.73    3.06 
   4 -13  -7   15.50    2.05 
  -4 -13   7   17.32    2.28 
  -4  13  -7   19.79    2.32 
   4 -13   7   20.80    2.06 
  -4 -13  -7   22.30    2.12 
   4 -13   7   17.22    2.59 
  -4  13   7   20.09    2.02 
  -4 -13  -7   15.91    2.59 
  -4  13   7   22.01    3.01 
   4 -13  -8   22.67    2.06 
  -4 -13   8   21.28    2.18 
  -4  13  -8   24.72    2.22 
   4 -13   8   22.48    2.04 
   4 -13   8   23.09    2.74 
  -4  13   8   22.58    2.30 
  -4 -13  -8   25.39    2.77 
  -4  13   8   22.43    2.76 
   4 -13  -9   53.91    2.45 
  -4 -13   9   57.30    2.76 
  -4  13  -9   50.27    2.67 
   4 -13   9   53.87    2.50 
   4 -13   9   57.02    3.42 
  -4  13   9   51.75    2.56 
  -4 -13  -9   51.98    3.07 
   4 -13 -10    9.65    2.20 
  -4 -13  10   11.03    2.16 
  -4  13 -10    8.82    2.41 
   4 -13  10    7.07    1.79 
   4 -13  10   10.29    2.46 
  -4  13  10    8.63    1.87 
  -4 -13 -10    7.19    2.44 
   4 -13 -11    6.37    2.11 
  -4 -13  11    7.80    2.25 
  -4  13 -11    7.16    2.24 
   4 -13  11    8.37    1.76 
   4 -13  11    9.34    2.47 
  -4  13  11    6.44    2.00 
  -4 -13 -11    7.56    2.19 
  -4 -13  12   10.96    2.52 
  -4  13 -12   10.71    2.43 
  -4  13 -12   11.84    2.77 
   4 -13  12   11.90    1.87 
  -4 -13 -12    8.49    1.87 
  -4  13 -13    0.46    3.77 
  -4 -13 -13    3.30    1.50 
  -4 -13 -13   -0.37    2.49 
   4 -14   0    0.56    1.77 
  -4 -14   0    1.32    1.69 
  -4  14   0   -0.08    1.33 
  -4  14   0   -0.39    2.27 
   4 -14  -1   21.80    2.03 
  -4  14  -1   16.64    2.81 
  -4  14  -1   14.41    2.35 
  -4 -14   1   18.97    2.19 
  -4  14   1   15.20    2.33 
  -4 -14  -1   17.04    1.94 
  -4  14   1   19.81    2.87 
   4 -14   1   16.49    2.04 
   4 -14  -2    9.23    1.77 
  -4  14  -2    2.35    2.92 
  -4  14  -2    5.41    2.21 
  -4 -14   2    7.50    1.99 
  -4  14   2    7.98    2.06 
  -4 -14  -2    9.51    1.98 
  -4  14   2    9.14    2.83 
   4 -14   2    8.68    1.88 
   4 -14  -3    4.86    1.86 
  -4  14  -3    1.19    2.69 
  -4  14  -3    5.92    1.51 
  -4 -14   3    4.27    1.90 
  -4  14   3    5.92    2.01 
  -4 -14  -3    2.98    2.43 
  -4  14   3    8.55    2.78 
   4 -14   3    3.94    1.78 
   4 -14  -4    9.37    1.69 
  -4  14  -4    4.47    2.51 
  -4  14  -4    9.07    1.95 
  -4 -14   4    4.44    2.07 
  -4  14   4    3.85    1.68 
  -4 -14  -4    8.04    1.85 
  -4  14   4    7.57    3.16 
   4 -14   4    7.35    1.88 
   4 -14  -5    4.67    1.68 
  -4  14  -5    8.12    2.59 
  -4  14  -5    5.22    1.80 
  -4 -14   5    5.73    1.96 
  -4  14   5    8.37    2.11 
  -4 -14  -5    4.50    2.08 
  -4  14   5   10.53    2.63 
   4 -14   5    6.53    1.85 
   4 -14  -6    9.69    1.70 
  -4  14  -6    7.09    2.07 
  -4 -14   6    9.91    2.21 
   4 -14   6    9.72    1.77 
  -4  14   6    7.04    2.01 
  -4 -14  -6    6.42    1.86 
  -4  14   6    8.80    2.87 
   4 -14  -7    7.35    1.89 
  -4  14  -7    8.56    2.00 
  -4 -14   7    7.85    1.98 
  -4  14   7    7.40    1.81 
   4 -14   7    8.98    2.07 
  -4  14   7    7.67    2.69 
   4 -14  -8    8.02    2.09 
  -4  14  -8    5.21    2.10 
  -4 -14   8    3.91    1.67 
  -4  14   8    6.45    1.87 
   4 -14   8    6.82    1.84 
   4 -14  -9    3.73    2.48 
  -4  14  -9    2.23    1.87 
  -4 -14   9    3.96    1.87 
  -4  14  -9    2.54    2.47 
  -4  14   9    2.43    2.03 
   4 -14   9    4.87    1.64 
  -4 -14  10    5.69    1.83 
  -4  14 -10    2.76    2.25 
  -4  14 -10    1.93    2.92 
   4 -14  10    2.88    1.94 
  -4 -14 -10    3.92    2.80 
  -4 -14  11    1.39    2.41 
  -4  14 -11    3.02    2.60 
  -4 -14 -12    0.40    1.37 
   4 -15   0    1.07    1.63 
  -4 -15   0    0.50    1.90 
  -4  15   0    2.90    2.27 
  -4  15   0    1.50    2.32 
   4 -15  -1   24.42    2.24 
  -4  15  -1   20.62    2.86 
  -4  15  -1   26.21    2.54 
  -4 -15   1   25.18    2.14 
  -4  15   1   23.73    2.19 
  -4 -15  -1   23.61    2.17 
  -4  15   1   22.16    3.18 
   4 -15   1   27.36    2.12 
   4 -15  -2    2.37    1.96 
  -4  15  -2    1.80    1.99 
  -4 -15   2    1.10    2.39 
  -4  15  -2   -1.96    2.49 
  -4 -15  -2    1.56    1.92 
  -4  15   2   -0.53    2.52 
  -4  15   2    1.87    1.98 
   4 -15  -3    0.94    1.97 
  -4  15  -3   -0.15    2.66 
  -4  15  -3    1.42    2.82 
  -4 -15   3    1.57    1.85 
  -4  15   3    0.34    1.90 
  -4 -15  -3   -1.43    1.54 
  -4  15   3   -1.70    2.81 
   4 -15   3    1.36    1.98 
   4 -15  -4    6.99    1.98 
  -4  15  -4    6.78    2.46 
  -4  15  -4    5.79    2.14 
  -4 -15   4    6.17    1.89 
  -4  15   4    5.47    1.98 
  -4 -15  -4    5.61    2.11 
  -4  15   4    6.33    2.73 
   4 -15   4    4.23    1.75 
  -4  15  -5   22.44    2.45 
  -4 -15   5   22.06    2.31 
  -4  15  -5   18.77    2.72 
  -4 -15  -5   28.15    2.23 
   4 -15   5   28.29    2.13 
  -4  15   5   20.78    2.96 
  -4  15  -6   17.18    2.62 
  -4 -15   6   16.91    2.01 
  -4  15  -6   14.90    2.56 
   4 -15   6   17.68    1.95 
  -4 -15   7    3.97    1.81 
  -4  15  -7    2.14    2.61 
   4 -15   7    2.58    2.07 
  -4 -15   8   11.18    2.26 
  -4 -15   9   16.34    2.52 
  -4 -16   0   15.84    2.15 
  -4  16   0   16.49    2.83 
  -4  16  -1    2.91    2.61 
  -4 -16   1    2.60    2.49 
  -4  16   1   -0.54    2.74 
  -4 -16  -1    3.16    1.74 
  -4  16  -2    6.21    2.83 
  -4 -16   2    7.17    2.39 
  -4  16   2    5.08    2.99 
  -4 -16  -2    4.76    1.86 
  -4 -16   3   14.04    1.90 
  -4  16  -3   15.74    3.34 
  -4 -16  -3   15.84    1.94 
  -4 -16   4   12.18    2.17 
  -4  16  -4   12.36    2.90 
  -4 -16  -4   10.83    1.79 
  -4 -16   5    1.18    2.26 
  -4  16  -5    2.06    2.83 
  -4  16  -6    4.01    5.78 
  -4 -17   1   -1.18    1.95 
   5   0   0    0.12    2.32 
  -5   0   0   -2.72    2.88 
   5   0  -1   96.03    4.98 
   5   0   1   87.93    4.86 
  -5   0   1   94.54    4.81 
  -5   0  -1   87.06    5.62 
   5   0  -2  382.92   15.12 
   5   0   2  372.60   10.09 
  -5   0   2  384.16   15.41 
  -5   0  -2  380.58   15.81 
   5   0  -3    5.84    2.60 
   5   0   3    8.09    2.54 
  -5   0   3   10.35    3.03 
  -5   0  -3    3.19    3.04 
   5   0  -4   25.64    3.00 
   5   0   4   20.92    3.15 
  -5   0   4   23.35    3.50 
  -5   0  -4   22.64    4.48 
  -5   0  -5    2.32    1.75 
   5   0  -5    0.64    1.80 
  -5   0  -5    1.61    3.08 
  -5   0  -6  481.42   18.26 
   5   0  -6  482.06   18.02 
  -5   0  -6  480.98   19.00 
  -5   0  -7    9.10    2.81 
   5   0  -7   11.49    3.06 
  -5   0  -7    7.85    3.35 
  -5   0  -8   19.38    3.35 
   5   0  -8   16.41    2.54 
  -5   0  -8   18.15    3.73 
  -5   0  -9   -0.51    2.61 
   5   0  -9   -1.05    2.94 
  -5   0  -9    2.08    3.70 
  -5   0  -9    0.97    2.12 
  -5   0   9    1.14    1.02 
  -5   0  -9    0.73    1.70 
  -5   0   9   -0.58    1.93 
  -5   0   9    1.33    1.34 
  -5   0 -10   44.24    3.75 
   5   0 -10   41.72    4.41 
  -5   0 -10   48.71    4.78 
   5   0 -10   41.51    2.59 
  -5   0  10   36.82    2.19 
  -5   0 -10   38.98    2.26 
  -5   0  10   43.46    1.93 
  -5   0  10   37.98    2.22 
  -5   0 -10   42.25    2.58 
  -5   0 -11    2.28    3.19 
   5   0 -11   -0.76    3.36 
  -5   0 -11   -1.05    3.31 
  -5   0  11   -1.90    0.98 
   5   0 -11   -0.17    1.59 
  -5   0 -11    1.84    2.17 
  -5   0  11    1.23    0.94 
  -5   0  11    1.76    1.43 
  -5   0 -11   -0.15    1.72 
   5   0 -12   32.07    4.43 
  -5   0  12   42.21    2.29 
   5   0 -12   39.69    2.84 
   5   0  12   38.08    2.27 
  -5   0 -12   41.29    3.01 
  -5   0  12   40.19    2.45 
  -5   0 -12   36.56    2.98 
  -5   0 -12   40.49    2.73 
  -5   0  12   37.87    2.52 
   5   0 -13   -1.46    3.10 
  -5   0  13    0.11    1.28 
   5   0 -13    3.60    2.00 
   5   0  13   -0.35    1.62 
  -5   0 -13   -1.16    1.39 
  -5   0  13    1.38    1.28 
  -5   0 -13    1.36    2.45 
  -5   0 -13   -0.98    1.26 
  -5   0  13   -0.06    1.73 
  -5   0  13   -1.98    1.63 
  -5   0  14   -0.63    0.93 
   5   0 -14   -0.25    1.50 
  -5   0 -14   -1.50    1.97 
  -5   0  14   -0.50    1.54 
  -5   0 -14   -3.13    2.28 
  -5   0 -14    0.78    2.07 
  -5   0  14    0.78    1.57 
  -5   0  14    1.55    1.34 
  -5   0  15    1.62    1.17 
   5   0 -15    1.56    2.45 
   5   0  15   -2.16    1.71 
  -5   0 -15   -1.65    2.18 
  -5   0  15    1.04    1.76 
  -5   0 -15    2.58    2.30 
  -5   0  15   -1.60    1.08 
  -5   0  16   -1.30    1.51 
   5   0 -16   -1.62    1.70 
   5   0  16   -0.28    1.67 
  -5   0 -16    2.26    1.68 
   5   0 -16    0.00    1.92 
  -5   0  16    1.86    1.64 
  -5   0 -16   -1.77    2.50 
  -5   0  16   -0.27    1.35 
  -5   0  17   13.64    1.52 
   5   0 -17   11.13    2.04 
   5   0  17   13.19    2.06 
  -5   0 -17    7.89    2.19 
   5   0 -17    8.93    2.12 
  -5   0  17   13.03    1.87 
  -5   0 -17   15.54    2.65 
  -5   0  17   14.31    1.80 
  -5   0  18    3.86    1.41 
   5   0 -18    4.12    2.24 
   5   0  18    2.31    1.88 
  -5   0 -18    1.63    2.05 
   5   0 -18    1.30    2.10 
  -5   0  18    2.98    1.98 
  -5   0 -18    3.64    2.39 
  -5   0  19    0.66    1.42 
   5   0 -19   -0.31    2.15 
  -5   0 -19    0.66    2.31 
   5   0 -19    2.25    2.45 
  -5   0  19    0.94    1.86 
  -5   0  20    8.10    2.08 
  -5   0 -20   11.78    2.69 
   5   0 -20    7.21    3.24 
   5   1   0  107.10    5.22 
   5  -1   0  108.73    5.24 
  -5  -1   0  104.29    5.51 
  -5   1   0  113.14    6.05 
   5  -1  -1  130.92    6.09 
   5   1   1  121.30    5.76 
  -5  -1   1  128.08    6.24 
  -5   1  -1  136.57    6.98 
   5   1  -1  119.96    5.34 
   5  -1   1  128.78    6.27 
  -5   1   1  121.08    5.48 
  -5  -1  -1  116.56    5.76 
   5  -1  -2  359.14   13.75 
   5   1   2  353.57   13.71 
  -5  -1   2  378.28   15.22 
  -5   1  -2  353.36   14.24 
   5   1  -2  343.48   13.74 
   5  -1   2  375.13    9.91 
  -5   1   2  366.07    9.70 
  -5  -1  -2  368.68   10.48 
   5  -1  -3   48.03    5.47 
   5   1   3   52.01    4.16 
  -5  -1   3   48.16    3.47 
  -5   1  -3   56.92    4.59 
   5   1  -3   49.64    3.82 
   5  -1   3   53.29    3.76 
  -5   1   3   51.46    7.19 
  -5  -1  -3   50.60    3.87 
  -5   1  -4  340.31   13.55 
   5  -1  -4  346.27   13.54 
   5   1   4  332.50   13.19 
   5  -1   4  340.62   13.18 
  -5   1   4  339.71   13.58 
  -5  -1  -4  351.98   14.13 
   5   1  -4  324.69   12.84 
  -5   1  -5  565.59   21.49 
   5  -1  -5  591.39   21.45 
   5   1  -5  552.43   20.35 
   5  -1   5  563.67   20.68 
  -5   1   5  611.24   21.67 
  -5  -1  -5  543.90   20.55 
  -5  -1  -5  558.70   20.71 
  -5   1  -6  114.10    7.90 
  -5   1  -6  101.23    5.35 
   5  -1  -6  105.34    7.12 
  -5  -1  -6  108.14    5.43 
  -5  -1  -6  109.93    5.82 
   5   1  -6   92.23    6.84 
  -5   1  -7   29.37    3.55 
  -5   1  -7   21.34    3.63 
   5  -1  -7   25.44    3.26 
  -5  -1  -7   23.96    3.21 
  -5  -1  -7   26.06    4.13 
   5   1  -7   25.46    3.82 
  -5   1  -8   22.43    3.32 
  -5   1  -8   24.20    3.83 
   5  -1  -8   27.73    3.69 
  -5  -1  -8   23.33    3.49 
  -5  -1  -8   24.50    3.76 
   5   1  -8   25.44    3.31 
  -5   1  -9   15.39    3.27 
  -5  -1   9   16.19    1.43 
   5  -1  -9   12.65    1.71 
   5  -1  -9   13.72    3.56 
  -5   1  -9   11.91    1.87 
  -5   1  -9   14.57    3.99 
  -5  -1   9   18.21    1.39 
  -5  -1   9   13.74    1.51 
  -5   1  -9   16.53    2.13 
  -5  -1   9   15.22    1.66 
  -5  -1   9   15.98    1.95 
  -5  -1  -9   14.72    1.65 
   5   1  -9   19.48    4.34 
  -5  -1  -9   16.56    3.18 
  -5   1   9   12.58    1.19 
  -5   1   9   16.52    1.69 
  -5  -1  -9   12.97    3.66 
  -5  -1  -9   13.05    1.51 
  -5  -1  -9   14.26    1.63 
  -5   1   9   11.56    1.18 
  -5   1 -10  132.92    7.59 
  -5  -1  10  139.09    6.01 
  -5  -1  10  120.59    5.09 
  -5   1 -10  118.44    7.08 
  -5   1 -10  125.53    5.83 
  -5   1 -10  120.50    5.32 
   5  -1 -10  123.32    5.08 
  -5   1 -10  128.85    5.74 
  -5  -1  10  128.17    5.12 
  -5  -1  10  130.88    5.18 
  -5  -1  10  132.01    5.39 
  -5  -1 -10  136.67    7.69 
  -5  -1 -10  125.72    5.16 
  -5   1  10  128.64    4.96 
  -5  -1 -10  122.28    5.52 
  -5   1  10  127.63    5.22 
  -5   1  10  129.31    5.16 
   5   1 -10  128.34    5.38 
  -5  -1 -10  126.01    6.02 
   5  -1  10  132.14    5.40 
   5   1 -10  139.01    7.42 
  -5   1  10  122.52    5.32 
  -5   1 -11   47.92    4.51 
   5  -1 -11   38.27    4.43 
  -5   1 -11   36.73    3.82 
  -5  -1  11   40.68    2.28 
   5  -1 -11   46.16    2.73 
  -5   1 -11   40.87    2.99 
  -5   1 -11   38.20    2.85 
  -5  -1  11   40.04    2.46 
  -5   1 -11   43.31    2.45 
  -5  -1  11   43.79    2.45 
   5   1 -11   42.44    5.04 
  -5   1  11   40.80    2.10 
   5  -1  11   40.03    2.41 
  -5  -1 -11   40.17    2.55 
   5   1 -11   36.80    2.48 
  -5   1  11   39.49    2.41 
  -5   1  11   40.63    2.20 
  -5  -1 -11   39.28    2.48 
  -5   1  11   41.93    2.96 
  -5   1  11   37.13    2.16 
  -5   1 -12  155.87    7.90 
   5  -1 -12  154.13    5.33 
   5  -1 -12  147.66    7.43 
  -5   1 -12  128.29    7.80 
  -5  -1  12  147.95    4.86 
  -5   1 -12  137.79    5.62 
  -5  -1  12  141.50    4.61 
  -5   1 -12  140.77    5.03 
  -5  -1  12  145.98    4.97 
  -5   1 -12  144.69    5.04 
  -5   1  12  145.44    4.73 
   5   1 -12  137.85   10.14 
  -5  -1 -12  162.89    6.12 
  -5   1  12  144.17    5.12 
   5  -1  12  156.17    5.31 
  -5   1  12  145.45    4.79 
  -5  -1 -12  153.36    5.61 
  -5   1  12  149.93    5.59 
   5   1 -12  154.61    5.87 
  -5   1  12  154.13    5.02 
  -5   1 -13   93.16    4.21 
   5  -1 -13   95.00    6.60 
  -5  -1  13   92.32    3.77 
  -5  -1  13   95.57    4.16 
  -5   1 -13  104.16    4.49 
   5  -1 -13  101.74    4.42 
  -5  -1  13   95.20    4.35 
  -5   1 -13   85.03    4.34 
   5  -1  13   93.88    4.11 
   5   1 -13   97.67    4.21 
  -5   1  13   95.10    3.93 
  -5   1  13   99.06    4.28 
   5   1 -13   79.43    6.05 
  -5  -1 -13   92.75    4.04 
  -5  -1 -13  100.72    4.63 
  -5   1  13   93.88    4.20 
  -5   1  13   99.46    4.04 
  -5  -1  14   37.82    2.18 
  -5  -1  14   35.08    2.50 
  -5   1 -14   40.78    3.31 
   5  -1 -14   32.70    2.75 
  -5   1 -14   36.52    3.29 
   5  -1  14   36.54    2.44 
   5   1 -14   38.37    2.46 
  -5   1  14   29.80    1.74 
  -5   1  14   34.18    2.11 
  -5  -1 -14   31.75    2.95 
  -5  -1 -14   34.24    2.64 
  -5   1  14   33.09    2.95 
  -5   1  14   35.21    2.30 
  -5  -1  15   -0.23    1.40 
  -5   1 -15    1.04    2.20 
  -5  -1  15    0.19    1.88 
   5  -1 -15   -4.41    2.16 
   5   1  15   -0.73    1.72 
  -5   1 -15   -4.14    2.13 
  -5   1  15   -0.37    1.00 
  -5  -1 -15    0.72    1.97 
   5   1 -15   -3.42    1.78 
  -5   1  15    2.98    1.69 
   5  -1  15    2.37    1.66 
  -5  -1 -15   -1.39    1.74 
  -5   1  15   -2.18    2.03 
  -5   1  15    2.90    1.65 
  -5  -1  16   -0.28    1.41 
  -5  -1  16   -0.95    1.79 
   5   1  16   -1.35    1.69 
   5  -1 -16    2.19    2.18 
  -5   1 -16    0.59    2.21 
   5  -1 -16   -0.63    1.45 
  -5   1 -16    2.57    2.19 
  -5   1  16   -2.25    1.50 
   5   1 -16    1.74    2.43 
  -5  -1 -16   -0.07    2.07 
   5   1 -16   -3.02    2.05 
   5  -1  16    1.47    1.77 
  -5   1  16   -1.02    1.80 
  -5  -1 -16   -0.07    1.75 
  -5   1  16    0.72    1.75 
  -5  -1  17   -1.91    1.28 
   5  -1 -17    0.18    2.15 
   5  -1 -17    6.51    2.09 
  -5   1 -17    4.28    2.63 
  -5  -1  17    2.38    1.61 
  -5   1 -17    0.08    1.90 
  -5  -1  17    0.29    2.06 
  -5   1  17   -0.34    1.18 
   5  -1  17   -0.10    1.60 
   5   1 -17    2.19    2.34 
  -5   1  17    1.06    1.78 
   5   1 -17    1.47    2.34 
  -5  -1 -17   -1.09    1.87 
  -5   1  17    0.58    1.25 
  -5  -1  18    0.62    1.36 
   5  -1 -18    1.36    2.23 
   5  -1 -18   -0.49    1.86 
  -5   1 -18   -1.52    2.02 
  -5  -1  18    3.63    1.92 
  -5   1 -18    2.91    2.48 
  -5   1  18   -1.31    1.22 
   5  -1  18   -1.18    1.74 
   5   1 -18    1.13    2.39 
  -5  -1 -18    1.39    2.14 
  -5   1  18    1.57    1.65 
   5   1 -18    3.40    1.70 
  -5  -1  19    3.98    1.31 
   5  -1 -19    0.41    1.97 
   5  -1 -19    1.98    1.91 
  -5   1 -19    2.63    2.20 
  -5  -1  19    1.01    2.01 
  -5   1 -19    3.10    2.76 
  -5   1  19    3.47    1.58 
   5  -1  19    1.66    1.96 
   5   1 -19    1.76    2.61 
  -5  -1 -19    1.32    2.24 
  -5   1  19    3.00    1.99 
   5   1 -19    5.01    2.19 
   5  -1 -20   10.34    2.46 
   5  -1 -20    7.72    2.53 
  -5  -1 -20    5.70    2.31 
  -5   1  20    7.84    2.09 
   5  -2   0   -0.40    2.36 
  -5  -2   0   -2.28    2.30 
  -5   2   0    0.21    3.10 
  -5   2  -1   31.81    4.15 
   5  -2  -1   27.08    3.56 
  -5  -2   1   27.33    3.50 
   5  -2   1   23.80    3.36 
  -5  -2  -1   25.59    3.10 
  -5   2   1   24.02    4.39 
   5   2  -1   21.39    3.43 
  -5   2  -2  225.66   10.37 
   5  -2  -2  210.98    8.38 
  -5  -2   2  224.67    9.47 
   5  -2   2  215.70    7.00 
  -5   2   2  214.08    7.04 
  -5  -2  -2  225.92   10.05 
   5   2  -2  212.55    8.74 
   5  -2  -3  219.73    9.91 
  -5   2  -3  225.81   10.38 
   5   2  -3  206.06    8.11 
   5  -2   3  220.97    9.53 
  -5  -2  -3  241.45   10.77 
   5   2   4  148.37    6.76 
   5  -2  -4  147.61    6.48 
  -5   2  -4  146.44    6.75 
   5   2  -4  133.68    6.41 
  -5  -2  -4  145.40    6.89 
   5  -2   4  146.86    7.54 
   5  -2  -5  769.86   17.23 
  -5   2  -5  847.59   20.29 
  -5  -2  -5  770.12   18.16 
   5   2  -5  743.35   26.19 
   5  -2   5  801.95   19.18 
  -5  -2  -5  773.86   18.66 
  -5   2  -6  107.93    7.49 
  -5   2  -6  111.19    8.35 
   5  -2  -6  108.60    7.52 
  -5  -2  -6  103.79    7.60 
   5   2  -6   89.04    6.63 
  -5   2  -7   46.10    3.81 
  -5   2  -7   48.33    4.73 
   5  -2  -7   42.21    3.52 
  -5  -2  -7   49.30    5.02 
   5   2  -7   42.04    4.07 
  -5   2  -8    7.51    3.11 
   5  -2  -8    9.28    2.95 
  -5   2  -8    9.59    3.92 
   5   2  -8    6.44    2.97 
  -5   2  -9   57.24    4.78 
  -5  -2   9   62.79    2.34 
   5  -2  -9   66.00    4.53 
  -5   2  -9   66.81    5.77 
  -5   2  -9   58.59    3.12 
  -5  -2   9   64.56    2.95 
   5  -2  -9   61.77    2.91 
  -5  -2   9   66.29    2.46 
  -5   2  -9   59.91    2.99 
  -5   2  -9   58.06    3.38 
  -5  -2   9   60.17    2.69 
   5   2  -9   65.24    5.29 
   5  -2   9   57.52    2.79 
  -5   2   9   58.97    2.82 
  -5  -2  -9   61.13    3.41 
  -5  -2  -9   66.41    2.34 
  -5  -2  -9   66.27    2.83 
  -5   2   9   63.03    1.99 
  -5   2   9   64.10    2.06 
  -5   2   9   63.99    2.25 
  -5   2 -10   62.13    4.85 
  -5  -2  10   64.76    2.90 
   5  -2 -10   62.72    5.22 
  -5   2 -10   56.41    4.86 
  -5  -2  10   70.65    2.91 
  -5  -2  10   69.85    3.50 
   5  -2 -10   60.96    3.15 
  -5   2 -10   61.41    3.24 
  -5  -2  10   59.74    2.77 
  -5   2 -10   57.49    3.05 
  -5   2 -10   61.34    3.50 
   5   2 -10   72.78    5.37 
  -5   2  10   64.55    2.67 
  -5   2  10   66.71    3.10 
  -5  -2 -10   63.72    3.43 
  -5  -2 -10   68.04    3.13 
  -5  -2 -10   64.64    3.04 
  -5   2  10   62.64    2.75 
  -5   2  10   66.27    3.25 
   5  -2  10   61.22    2.84 
  -5   2  10   61.55    2.91 
  -5   2 -11   -2.29    2.68 
  -5  -2  11    0.46    1.66 
   5  -2 -11    0.92    3.16 
  -5   2 -11   -1.53    2.43 
  -5  -2  11    3.61    1.20 
  -5   2 -11    4.03    1.97 
  -5  -2  11    0.44    1.97 
   5  -2 -11    0.97    1.70 
  -5  -2  11    2.37    1.62 
  -5  -2  11    0.11    1.31 
  -5   2 -11   -0.15    1.16 
  -5   2 -11    0.48    2.26 
  -5   2  11    2.14    1.38 
   5   2 -11    1.89    3.30 
  -5   2  11    1.67    1.76 
  -5   2  11    1.57    1.17 
  -5  -2 -11   -0.22    1.06 
  -5  -2 -11    0.70    1.70 
   5   2 -11    3.81    2.08 
  -5   2  11    2.48    2.01 
   5  -2  11    1.37    1.61 
  -5   2  11    1.68    1.53 
  -5   2 -12    7.97    4.19 
  -5   2 -12    5.34    1.90 
   5  -2 -12    7.58    3.30 
  -5   2 -12   11.02    4.62 
  -5  -2  12    9.65    1.66 
   5  -2 -12    7.61    1.31 
  -5  -2  12    7.76    1.37 
  -5  -2  12    9.50    1.56 
  -5   2 -12    6.10    2.30 
   5   2 -12    7.33    3.56 
   5  -2  12    6.72    1.63 
  -5   2  12    8.07    1.49 
  -5  -2 -12    7.90    1.43 
  -5   2  12    9.44    1.26 
  -5   2  12    5.72    1.35 
  -5  -2 -12    6.30    1.66 
  -5   2  12    7.59    1.67 
   5   2 -12    6.84    2.36 
  -5   2  12    7.23    1.64 
  -5  -2  13   10.81    1.76 
  -5  -2  13   10.52    1.63 
   5  -2 -13   16.88    2.14 
  -5   2 -13   10.52    1.65 
  -5   2 -13    9.94    2.25 
  -5  -2  13    7.37    1.63 
   5  -2  13   15.31    1.77 
   5   2 -13   11.90    2.29 
  -5   2  13   15.23    1.43 
  -5   2  13   13.88    1.91 
  -5  -2 -13   10.51    1.75 
  -5   2  13   14.15    2.19 
  -5   2  13    8.81    1.46 
  -5  -2  14   10.03    1.49 
  -5  -2  14    9.37    1.68 
  -5  -2  14    7.85    1.66 
   5  -2 -14    5.56    1.91 
  -5   2 -14    7.03    2.19 
  -5   2 -14    8.24    2.02 
  -5  -2  14    8.56    1.42 
   5  -2  14    8.87    1.37 
   5   2 -14   11.07    2.33 
  -5   2  14    7.09    1.38 
  -5   2  14   10.83    2.05 
  -5  -2 -14    7.90    1.45 
  -5   2  14   11.86    2.34 
  -5   2  14    8.81    1.60 
  -5  -2  15   33.00    2.14 
  -5  -2  15   28.83    2.15 
  -5  -2  15   30.46    2.36 
   5  -2 -15   32.00    2.28 
  -5   2 -15   26.14    2.43 
  -5   2 -15   31.20    2.69 
  -5  -2 -15   27.33    2.63 
   5   2 -15   31.04    2.43 
   5   2 -15   29.60    3.01 
  -5   2  15   31.03    2.37 
   5  -2  15   28.21    2.25 
  -5  -2 -15   32.10    2.45 
  -5   2  15   27.34    2.84 
  -5   2  15   29.83    1.87 
  -5   2  15   31.96    2.28 
  -5  -2  16    0.94    1.35 
   5  -2 -16    2.86    1.75 
   5  -2 -16    4.63    2.23 
  -5   2 -16    2.06    2.35 
  -5  -2  16    1.91    1.69 
  -5   2 -16    2.75    2.21 
  -5   2  16    1.78    1.36 
   5  -2  16    4.28    2.00 
   5   2 -16    3.46    1.80 
  -5  -2 -16    4.68    2.77 
  -5   2  16    5.10    1.32 
   5   2 -16    6.04    2.11 
  -5  -2 -16    2.28    1.73 
  -5   2  16    2.59    1.80 
  -5  -2  17    7.44    1.44 
   5  -2 -17    6.35    2.24 
   5  -2 -17    3.60    2.15 
  -5   2 -17    6.85    2.45 
  -5  -2  17    2.84    1.80 
  -5   2 -17    4.83    2.14 
  -5   2  17    8.26    1.39 
   5  -2  17    7.69    1.83 
   5   2 -17    6.73    2.33 
  -5  -2 -17    7.01    2.16 
  -5   2  17    5.33    1.67 
   5   2 -17    4.94    2.41 
  -5  -2 -17    7.30    2.07 
  -5   2  17    7.22    1.82 
  -5  -2  18    0.73    1.45 
   5  -2 -18    0.45    2.05 
   5  -2 -18   -2.59    1.85 
  -5   2 -18    0.15    2.69 
  -5  -2  18    0.01    1.81 
  -5   2 -18    2.08    2.37 
  -5   2  18    1.12    1.31 
   5  -2  18    0.52    1.88 
   5   2 -18    2.08    2.40 
  -5  -2 -18    0.36    2.04 
  -5   2  18    0.64    1.68 
   5   2 -18   -1.41    2.16 
  -5   2  18    0.32    1.29 
  -5  -2  19   16.94    1.51 
   5  -2 -19   18.37    2.59 
   5  -2 -19   17.94    2.78 
  -5  -2  19   18.59    2.02 
  -5   2 -19   14.94    2.72 
   5  -2  19   18.45    2.42 
  -5   2  19   15.33    1.89 
  -5  -2 -19   17.01    2.41 
   5   2 -19   17.71    3.12 
   5  -2 -20    3.89    2.11 
   5  -2 -20    3.72    2.34 
  -5  -2 -20    2.87    2.19 
  -5   2  20    3.47    2.20 
   5  -3   0  496.97   18.75 
  -5  -3   0  476.65   17.91 
   5  -3  -1  261.61   10.46 
  -5   3  -1  245.34   10.90 
   5  -3   1  226.60   10.07 
  -5  -3  -1  236.91   10.46 
   5  -3  -2  204.24    7.77 
  -5   3  -2  201.63    8.69 
   5  -3   2  203.80    7.75 
  -5  -3  -2  182.99    7.73 
   5  -3  -3   12.90    2.56 
  -5   3  -3    9.98    3.96 
   5  -3   3   10.24    3.34 
  -5  -3  -3   12.82    3.07 
   5  -3  -4  268.18   10.73 
  -5   3  -4  258.99   11.08 
   5   3  -4  253.69   11.52 
   5  -3   4  271.92   11.31 
  -5   3   4  245.05   10.95 
   5  -3  -5  347.12   14.85 
  -5   3  -5  354.91   15.58 
   5   3  -5  327.40   14.39 
   5  -3   5  332.86   14.27 
  -5   3   5  378.56   15.77 
   5  -3  -6   48.24    3.69 
  -5   3  -6   51.11    4.46 
   5   3  -6   41.46    3.80 
   5  -3   6   43.53    4.27 
  -5   3   6   44.15    4.29 
   5  -3  -7   41.98    3.88 
  -5   3  -7   40.68    4.59 
   5   3  -7   38.77    4.00 
  -5   3  -8    2.11    2.83 
  -5  -3   8    3.19    1.16 
   5  -3  -8    5.58    3.16 
  -5   3  -8    0.16    3.80 
  -5  -3   8    3.74    1.66 
   5  -3  -8    2.27    2.27 
  -5  -3   8    3.16    0.93 
   5   3  -8    1.85    2.86 
  -5   3   8    4.90    1.45 
  -5  -3  -8    5.12    1.30 
  -5  -3  -8    4.88    1.68 
  -5   3   8    1.69    1.35 
  -5   3  -9   84.94    5.45 
  -5   3  -9   77.89    3.59 
   5  -3  -9   81.74    5.67 
  -5   3  -9   87.42    6.47 
  -5  -3   9   82.09    3.68 
   5  -3  -9   85.51    3.96 
  -5   3  -9   77.34    3.92 
  -5  -3   9   81.12    3.50 
  -5  -3   9   78.26    3.67 
  -5   3  -9   81.51    3.89 
  -5  -3   9   73.67    3.85 
  -5  -3  -9   73.71    3.74 
  -5  -3  -9   72.07    3.32 
   5   3  -9   79.53    5.84 
  -5  -3  -9   83.92    4.05 
   5  -3   9   75.80    3.46 
  -5   3   9   76.95    4.15 
  -5   3   9   77.99    3.51 
  -5   3   9   82.00    3.75 
  -5   3 -10   21.28    4.04 
   5  -3 -10   22.19    3.24 
  -5   3 -10   22.62    3.72 
  -5  -3  10   20.66    1.54 
  -5  -3  10   22.15    1.71 
   5  -3 -10   22.21    1.95 
  -5   3 -10   18.23    2.42 
  -5  -3  10   19.03    1.55 
  -5  -3  10   22.82    2.16 
  -5   3 -10   16.06    2.06 
  -5  -3 -10   23.16    2.28 
  -5   3  10   19.37    1.53 
   5  -3  10   20.30    1.88 
  -5  -3 -10   22.52    2.25 
  -5  -3 -10   22.38    1.73 
  -5   3  10   24.56    2.55 
  -5   3  10   22.53    1.99 
  -5   3  10   20.76    1.79 
  -5   3 -11  109.91    6.18 
  -5   3 -11   96.38    6.02 
  -5  -3  11  113.26    3.83 
  -5  -3  11  116.83    3.92 
   5  -3 -11  106.84    4.04 
  -5   3 -11  108.74    4.57 
  -5   3 -11  103.62    4.26 
  -5  -3  11  102.47    3.58 
  -5   3  11  115.11    4.01 
  -5  -3 -11  118.21    4.18 
  -5  -3 -11  116.92    4.68 
  -5   3  11  107.89    3.89 
  -5  -3 -11  116.30    4.58 
  -5   3  11  113.91    4.47 
   5  -3  11  119.55    4.21 
  -5   3  11  109.82    4.03 
  -5   3 -12   42.31    4.85 
   5  -3 -12   40.06    4.62 
  -5   3 -12   34.09    5.05 
  -5  -3  12   45.41    2.28 
  -5  -3  12   44.28    2.30 
  -5  -3  12   35.72    2.12 
   5  -3 -12   41.61    2.62 
  -5   3 -12   35.38    2.82 
  -5   3 -12   43.09    2.96 
   5   3 -12   38.71    2.77 
  -5  -3 -12   45.05    2.77 
  -5  -3 -12   36.32    3.17 
  -5   3  12   43.78    2.58 
   5  -3  12   37.41    2.43 
  -5  -3 -12   36.37    2.78 
  -5   3  12   37.69    2.64 
  -5   3  12   36.37    1.93 
  -5   3  12   42.18    2.59 
  -5  -3  13  114.91    4.70 
  -5  -3  13  106.27    4.75 
   5  -3 -13  108.99    4.79 
  -5   3 -13  101.72    5.10 
  -5  -3  13  111.26    4.46 
  -5   3 -13   93.32    4.46 
  -5  -3 -13  108.33    5.04 
   5   3 -13  104.27    5.00 
  -5   3  13  110.29    4.80 
   5  -3  13  108.57    4.65 
  -5  -3 -13   98.88    4.74 
  -5   3  13  110.51    5.05 
  -5   3  13  102.15    4.22 
  -5   3  13  101.82    4.28 
  -5  -3  14   71.05    3.95 
  -5  -3  14   65.82    3.35 
   5  -3 -14   61.45    3.34 
  -5   3 -14   61.16    3.40 
  -5  -3  14   60.82    3.28 
  -5   3 -14   69.99    4.02 
  -5  -3 -14   69.93    3.59 
   5   3 -14   71.47    3.96 
  -5   3  14   63.08    3.40 
   5  -3  14   66.66    3.07 
  -5  -3 -14   62.41    3.41 
  -5   3  14   68.34    3.71 
  -5   3  14   69.67    3.15 
  -5   3  14   68.85    3.25 
  -5  -3  15   10.80    1.40 
  -5  -3  15    8.25    1.66 
  -5  -3  15    9.43    1.89 
   5  -3 -15   10.99    2.05 
  -5   3 -15    9.93    2.45 
  -5  -3  15    9.66    1.68 
  -5   3 -15    7.69    2.33 
   5   3 -15   10.32    2.50 
   5   3 -15   12.06    2.22 
  -5   3  15   12.39    2.01 
   5  -3  15   10.16    1.75 
  -5  -3 -15    9.29    2.08 
  -5   3  15    9.97    1.73 
  -5   3  15   11.49    1.41 
  -5   3  15   13.19    1.73 
  -5  -3  16    2.79    1.46 
  -5   3 -16    0.44    2.56 
   5  -3 -16    4.76    2.03 
  -5   3 -16    1.48    2.18 
  -5  -3  16    2.39    2.09 
  -5  -3  16    6.43    1.75 
  -5   3  16    2.65    1.42 
   5  -3  16    4.01    1.80 
  -5   3  16    3.41    1.70 
  -5  -3 -16    3.44    1.81 
  -5   3  16    5.43    2.19 
   5   3 -16    0.24    2.12 
  -5   3  16    2.93    1.62 
  -5  -3  17   19.74    1.54 
  -5  -3  17   14.88    2.16 
  -5   3 -17   18.03    2.58 
   5  -3 -17   16.34    2.37 
   5  -3 -17   14.48    2.09 
  -5   3 -17   18.61    2.72 
   5  -3  17   20.04    1.95 
   5   3 -17   24.13    2.50 
  -5   3  17   15.56    1.62 
  -5   3  17   18.55    1.98 
  -5  -3 -17   16.95    2.38 
  -5   3  17   20.46    2.10 
  -5  -3  18   14.15    1.40 
  -5   3 -18   14.06    2.61 
   5  -3 -18   16.30    2.41 
  -5  -3  18   17.66    2.08 
   5  -3 -18   15.20    2.32 
   5  -3  18   17.37    1.94 
  -5   3  18   18.61    1.87 
  -5   3  18   17.68    1.90 
   5   3 -18   12.96    3.05 
  -5  -3  19    4.97    1.56 
   5  -3 -19    3.84    2.13 
  -5   3 -19    2.44    2.31 
   5  -3 -19    5.40    2.07 
  -5   3  19    5.10    1.85 
   5  -3  19    4.41    1.80 
  -5  -3 -20    1.57    2.34 
  -5   3  20    1.91    2.50 
   5  -4   0  127.26    6.23 
  -5   4   0  106.56    5.81 
   5  -4  -1   86.48    4.46 
   5  -4   1   96.40    5.04 
  -5   4   1   94.79    4.99 
   5  -4  -2 1458.93   28.11 
   5  -4   2 1360.47   27.61 
  -5   4   2 1311.40   27.25 
   5  -4  -3  129.44    5.74 
   5  -4   3  119.65    5.58 
  -5   4   3  126.76    6.12 
   5  -4  -4   15.87    3.22 
  -5   4  -4   18.89    3.97 
   5  -4   4   15.03    3.33 
  -5   4   4   19.15    3.54 
   5  -4  -5   82.15    5.97 
  -5   4  -5   81.30    6.88 
   5  -4   5   79.02    6.03 
  -5   4   5   75.19    5.96 
   5  -4  -6  249.90   11.11 
  -5   4  -6  213.28   10.56 
   5  -4   6  208.25   10.11 
  -5   4   6  240.22   10.92 
   5  -4  -7  118.66    7.06 
  -5  -4   7  113.44    6.35 
  -5   4  -7  113.60    8.56 
   5  -4  -7  108.59    6.09 
   5  -4   7  124.87    7.01 
  -5   4   7  118.85    4.63 
  -5   4   7  115.87    4.14 
  -5  -4  -7  118.36    5.38 
   5  -4  -8  457.00   18.54 
  -5  -4   8  406.24   14.50 
  -5   4  -8  429.78   17.96 
  -5  -4   8  434.26   15.46 
   5  -4  -8  401.86   14.44 
  -5   4  -8  430.49   15.65 
  -5  -4   8  421.03   14.83 
  -5  -4  -8  417.14   15.04 
  -5  -4  -8  444.20   16.19 
  -5   4   8  425.89   14.93 
  -5   4   8  466.19   16.55 
   5  -4   8  400.82   14.24 
  -5   4   8  415.07   15.48 
   5  -4   8  475.38   19.64 
  -5   4   8  428.69   15.58 
   5  -4  -9  127.96    7.06 
  -5  -4   9  132.93    4.82 
  -5   4  -9  144.40    8.15 
  -5   4  -9  133.31    5.31 
  -5  -4   9  140.48    4.77 
   5  -4  -9  142.23    5.11 
  -5  -4   9  136.73    4.89 
   5  -4   9  126.85    5.94 
   5  -4   9  136.77    6.87 
  -5  -4  -9  129.80    5.15 
  -5   4   9  138.98    4.84 
  -5   4   9  129.67    4.74 
   5  -4   9  129.07    4.72 
  -5   4   9  147.56    5.78 
  -5  -4  -9  131.87    4.65 
  -5   4   9  129.90    4.78 
  -5   4 -10   27.37    3.28 
   5  -4 -10   32.58    3.31 
  -5   4 -10   28.55    5.11 
  -5  -4  10   32.30    1.67 
  -5  -4  10   34.06    1.86 
   5  -4 -10   33.61    1.80 
  -5   4 -10   33.20    2.14 
  -5  -4  10   33.58    1.80 
  -5   4  10   27.84    1.80 
  -5  -4 -10   31.39    1.79 
  -5   4  10   27.91    1.51 
  -5   4  10   33.88    2.03 
   5  -4  10   29.18    1.67 
  -5  -4 -10   32.87    2.18 
  -5   4  10   25.16    2.61 
  -5  -4 -10   29.30    2.45 
  -5   4  10   30.36    1.71 
  -5   4 -11   18.14    2.97 
   5  -4 -11   12.07    3.15 
  -5   4 -11   13.94    4.81 
  -5  -4  11   17.75    1.55 
  -5  -4  11   15.15    1.65 
   5  -4 -11   17.21    2.10 
  -5   4 -11   13.66    1.85 
  -5  -4  11   17.19    1.79 
  -5   4  11   18.08    1.90 
  -5  -4 -11   18.77    1.78 
  -5   4  11   15.34    1.50 
  -5   4  11   16.73    1.83 
   5  -4  11   16.16    1.48 
  -5  -4 -11   14.78    2.12 
  -5   4  11   15.46    2.57 
  -5  -4 -11   17.52    2.54 
  -5   4  11   17.46    1.74 
   5  -4 -12   38.54    3.94 
  -5   4 -12   33.74    4.28 
  -5  -4  12   39.75    2.22 
  -5  -4  12   34.82    2.44 
   5  -4 -12   34.12    1.95 
  -5   4 -12   35.80    3.02 
  -5  -4  12   35.36    2.38 
  -5   4 -12   38.83    2.98 
  -5  -4 -12   36.49    2.05 
   5  -4  12   32.90    2.11 
  -5   4  12   33.83    1.73 
  -5   4  12   41.17    2.49 
  -5  -4 -12   33.93    2.80 
  -5  -4 -12   34.55    2.61 
  -5   4  12   41.87    3.11 
  -5   4  12   36.00    2.06 
  -5   4  12   37.38    2.07 
  -5  -4  13   25.06    1.90 
  -5  -4  13   20.89    1.61 
   5  -4 -13   20.61    1.84 
  -5   4 -13   26.59    2.32 
  -5   4 -13   26.55    2.56 
  -5  -4  13   24.93    1.95 
  -5   4  13   25.90    1.97 
  -5  -4 -13   21.77    1.99 
  -5  -4 -13   24.94    2.64 
  -5   4  13   18.36    2.26 
  -5  -4 -13   27.76    2.23 
  -5   4  13   17.70    2.80 
   5  -4  13   22.02    1.83 
  -5   4  13   20.43    1.95 
  -5   4 -14   57.64    3.61 
   5  -4 -14   49.10    2.90 
  -5  -4  14   47.74    2.52 
  -5  -4  14   54.42    2.82 
   5  -4  14   52.03    2.88 
  -5  -4 -14   48.98    2.99 
  -5   4  14   51.39    2.97 
  -5  -4 -14   52.85    2.93 
  -5   4  14   42.20    3.43 
  -5   4  14   50.63    2.59 
  -5   4  14   43.75    2.47 
  -5  -4  15   11.61    1.89 
  -5  -4  15   11.02    1.54 
   5  -4 -15    8.03    2.14 
  -5  -4  15   11.44    1.76 
  -5   4 -15   17.06    2.68 
   5  -4  15    9.93    1.66 
   5   4 -15   10.50    2.39 
  -5   4  15   10.94    1.62 
  -5   4  15   10.79    1.81 
  -5  -4 -15    9.91    1.90 
  -5   4  15   12.70    2.21 
  -5  -4 -15   10.13    2.24 
  -5   4  15    9.59    1.59 
   5  -4 -16    4.55    1.83 
  -5  -4  16    1.74    1.90 
   5  -4 -16    8.47    2.50 
  -5   4 -16    3.62    2.20 
  -5  -4  16    4.77    1.78 
  -5  -4 -16    3.83    2.06 
  -5   4  16    4.54    1.50 
   5   4 -16    3.78    2.30 
  -5   4  16    5.30    2.11 
   5  -4  16    2.87    1.59 
  -5  -4 -16    3.40    1.89 
  -5   4  16    5.49    2.12 
  -5   4  16    4.18    1.66 
  -5  -4  17    2.14    1.26 
   5  -4 -17    3.83    1.88 
  -5   4 -17    0.66    2.50 
  -5   4  17    3.33    1.53 
  -5  -4 -17    4.34    2.26 
  -5   4  17    1.08    1.80 
   5  -4  17    0.61    1.72 
  -5  -4 -17    3.12    1.88 
  -5   4  17    2.25    1.83 
  -5  -4  18    6.28    1.34 
   5  -4 -18    6.18    2.34 
  -5   4 -18    6.06    2.18 
  -5  -4 -18    6.36    2.06 
  -5   4  18    7.81    1.90 
   5  -4  18    3.89    1.77 
  -5  -4 -18    5.75    2.14 
  -5  -4  19    2.25    1.09 
   5  -4 -19    3.94    2.07 
  -5   4 -19    0.84    2.37 
  -5  -4 -19    1.81    2.22 
  -5   4  19    0.09    2.04 
   5  -4  19    3.47    1.59 
   5  -5   0  128.18    7.27 
  -5   5   0  127.85    7.29 
   5  -5  -1  103.85    7.65 
  -5   5  -1  110.76    8.09 
   5  -5   1   96.11    7.09 
  -5   5   1   97.15    7.26 
   5  -5  -2   82.77    6.29 
  -5   5  -2   80.76    6.49 
   5  -5   2   85.40    6.65 
  -5   5   2   84.09    6.59 
   5  -5  -3  596.48   22.57 
   5  -5   3  608.27   23.50 
   5  -5  -4   15.65    3.63 
   5  -5   4   10.40    3.37 
  -5   5   4   14.11    3.34 
   5  -5  -5   94.43    6.96 
   5  -5   5   92.64    7.08 
  -5   5   5  104.72    7.43 
  -5   5  -6  116.48    4.71 
   5  -5  -6  113.11    6.35 
  -5  -5   6  116.54    4.72 
   5  -5   6  128.04    7.48 
   5  -5   6  114.08    6.52 
  -5   5   6  105.28    5.71 
  -5   5   6  112.58    6.48 
  -5   5   6  124.71    6.87 
  -5  -5  -6  121.95    5.53 
  -5   5   6  121.04    5.59 
   5  -5  -7   81.07    5.09 
  -5  -5   7   74.49    3.31 
  -5   5  -7   73.40    5.86 
   5  -5  -7   72.36    3.36 
  -5   5  -7   70.35    3.57 
   5  -5   7   73.53    3.57 
   5  -5   7   79.86    5.51 
   5  -5   7   80.11    3.62 
  -5  -5  -7   68.34    3.48 
  -5   5   7   80.12    3.49 
  -5   5   7   73.36    3.37 
  -5  -5  -7   83.49    4.14 
  -5  -5  -7   81.79    4.19 
  -5   5   7   81.97    4.23 
  -5   5   7   73.08    3.40 
   5  -5  -8   31.67    3.67 
  -5  -5   8   28.81    1.55 
  -5   5  -8   32.29    4.60 
  -5  -5   8   27.79    1.75 
  -5  -5   8   28.70    1.70 
   5  -5  -8   28.12    1.95 
  -5   5  -8   30.48    2.52 
   5  -5   8   25.35    3.91 
  -5  -5  -8   29.50    1.62 
  -5  -5  -8   27.36    2.41 
  -5   5   8   28.65    2.16 
  -5   5   8   27.96    2.73 
   5  -5   8   29.07    1.69 
  -5  -5  -8   35.64    2.51 
  -5   5   8   25.21    3.56 
   5  -5   8   29.56    1.87 
  -5   5   8   26.42    2.28 
   5  -5  -9   28.42    3.63 
  -5  -5   9   26.42    1.83 
  -5   5  -9   31.68    4.34 
  -5   5  -9   30.43    2.36 
  -5  -5   9   29.92    1.82 
   5  -5  -9   29.73    1.86 
  -5  -5   9   25.87    1.64 
   5  -5   9   29.38    1.94 
   5  -5   9   27.29    3.68 
  -5  -5  -9   28.08    2.27 
  -5   5   9   34.60    1.71 
  -5   5   9   28.94    1.78 
   5  -5   9   31.96    1.90 
  -5   5   9   28.93    2.70 
  -5  -5  -9   34.17    1.92 
  -5   5   9   30.00    1.85 
   5  -5 -10  156.82    7.62 
  -5  -5  10  160.75    5.07 
  -5   5 -10  157.54    8.39 
  -5   5 -10  172.51    5.90 
  -5  -5  10  161.09    5.22 
   5  -5 -10  152.50    5.04 
  -5  -5  10  154.79    4.99 
   5  -5  10  155.09    4.96 
   5  -5  10  165.39    8.72 
  -5  -5 -10  168.27    6.06 
  -5   5  10  157.90    4.89 
  -5   5  10  173.59    5.75 
   5  -5  10  160.91    5.27 
  -5   5  10  161.68    5.61 
  -5  -5 -10  164.04    5.39 
  -5   5  10  156.78    5.07 
   5  -5 -11   16.02    3.40 
  -5   5 -11   11.63    2.28 
  -5   5 -11   16.76    4.67 
   5  -5 -11   17.55    1.88 
  -5  -5  11   15.33    1.49
[truncated: 427,956 more chars]
